# Supplementary material for: The effects of MicroRNA transfections on global patterns of gene expression in ovarian cancer cells are functionally coordinated
Source: PubMed Central journal article supplement (PMC3481362; doi:10.1186/1755-8794-5-33), 2012-08-01
Supplement: 1755-8794-5-33-S1.pdf [file 1755-8794-5-33-S1.pdf]

# Effects of MicroRNA Transfections on Global Patterns of Gene Expression are Functionally Coordinated

Shubin W. Shahab<sup>1,2</sup>, Lilya V. Matyunina<sup>1,2,3</sup>, Christopher G. Hill<sup>1,2</sup>, Lijuan Wang<sup>1,2</sup>, Roman Mezenцев<sup>1,2</sup>, L. DeEtte Walker<sup>1,2,3</sup> and John F. McDonald<sup>1,2,3</sup>

<sup>1</sup>School of Biology, Georgia Institute of Technology, Atlanta, GA, 30332, USA, <sup>2</sup>Parker H. Petit Institute for Bioengineering and Bioscience, Georgia Institute of Technology, Atlanta, GA, 30332, USA, <sup>3</sup>Ovarian Cancer Institute, Atlanta, GA, 30342, USA.

## Supplementary Information

### Table of Content

#### *Supplementary Figures*

*Page*

Figure 1. Confirmation of successful miR-128 transfection into HEY cells.....3

Figure 2. Confirmation of EGFR down-regulation by siRNA.....4

Figure 3. Deconvolution of DNA content histograms for Hey cells.....5

#### *Supplementary Tables*

Table 1. Differentially expressed genes in miR-7 transfected HEY cells.....6

Table 2. Differentially expressed genes in miR-128 transfected HEY cells.....41

Table 3. Differentially expressed genes in siRNA transfected HEY cells.....107

Table 4. miRNA target enrichment analysis for up-regulated genes after miR-128 transfection.....108

Table 5. Microarray expression levels of pre-transfected HEY cell miRNAs.....117

Table 6. miRNA target enrichment analysis for up-regulated genes following miR-7 transfection.....139

|                                                                                                              |     |
|--------------------------------------------------------------------------------------------------------------|-----|
| Table 7. Hub genes and their targets affected by miR-7 in HEY cells.....                                     | 140 |
| Table 8. Hub genes and their targets affected by miR-128 in HEY cells.....                                   | 151 |
| Table 9. Differentially expressed genes that are targeted by NF- $\kappa$ B or IL-1 Beta.....                | 250 |
| Table 10. Direct downstream targets of Caveolin-1 and SMAD2.....                                             | 251 |
| Table 11. GeneGo pathway maps following miR-7 transfection into HEY cells.....                               | 252 |
| Table 12. GeneGo pathway maps following miR-128 transfection into HEY cells.....                             | 255 |
| Table 13. GeneGo pathway maps for down-regulated genes following miR-7 transfection<br>into HEY cells.....   | 262 |
| Table 14. GeneGo pathway maps for down-regulated genes following miR-128 transfection<br>into HEY cells..... | 266 |
| Table 15. GeneGo pathway maps for up-regulated genes following miR-7 transfection<br>into HEY cells.....     | 268 |
| Table 16. GeneGo pathway maps for up-regulated genes following miR-128 transfection into<br>HEY cells.....   | 269 |

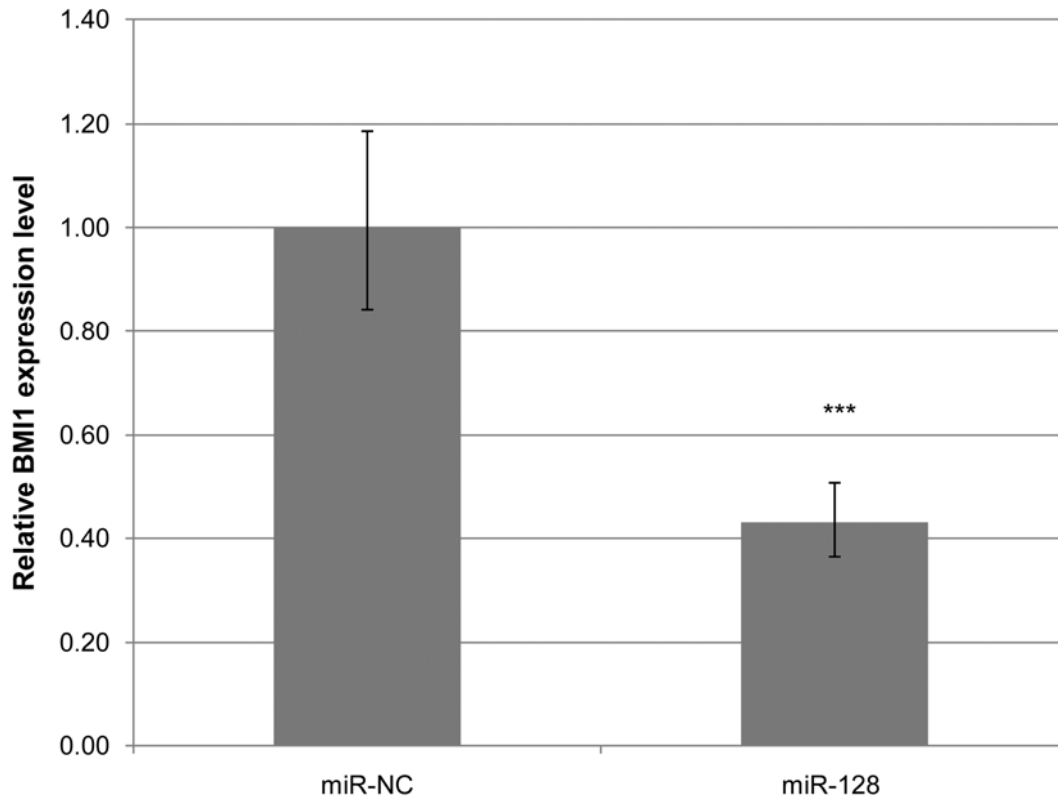

**Supplementary Figure 1. Confirmation of successful miR-128 transfection into HEY cells.**

Successful transfection of miR-128 was confirmed by assaying the relative down-regulation of its validated target BMI1. Here we confirmed successful transfection of the miRNA into HEY cells by measuring BMI1 RNA level using qPCR following transfection of either miR-NC or miR-128 into HEY cells. Transfection of miR-128 down-regulated BMI1 by ~60 % relative to miR-NC. \*\*\* p <0.005.

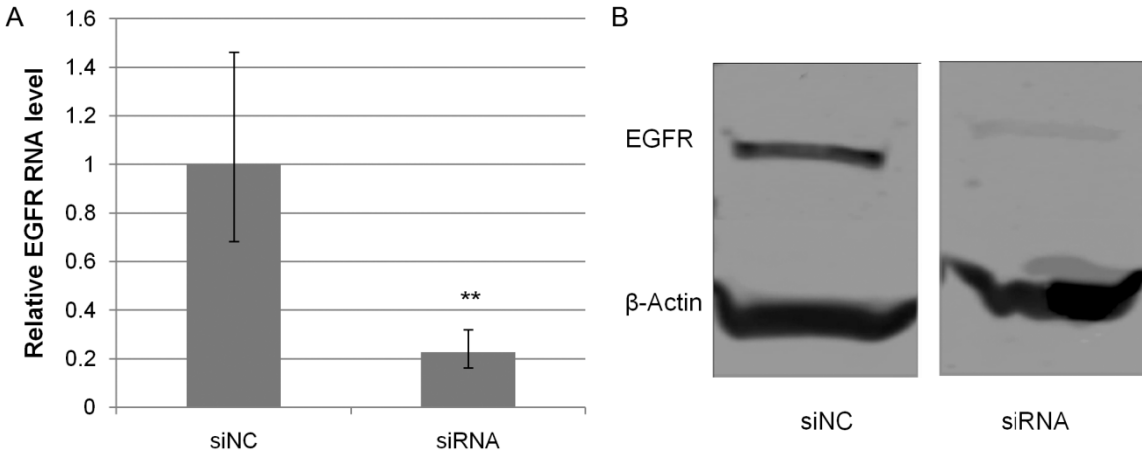

**Supplementary Figure 2. Confirmation of EGFR down-regulation by siRNA.** (A) Relative EGFR RNA levels determined by qPCR following transfection of EGFR siRNA (siRNA) or negative control siRNA (siNC) in HEY cells using GAPDH as endogenous control. Error bars show standard deviations from the mean based on RNA levels of 3 independent biological replicates. Statistical analysis was done using randomization with the help of REST 2008 software with at least 1000 iterations. \*\*  $p < 0.05$ . (B) Representative image of Western blot analysis of EGFR protein levels after transfection with EGFR siRNA or negative control siRNA (siNC).  $\beta$ -Actin is used as loading control for the immunoblot.

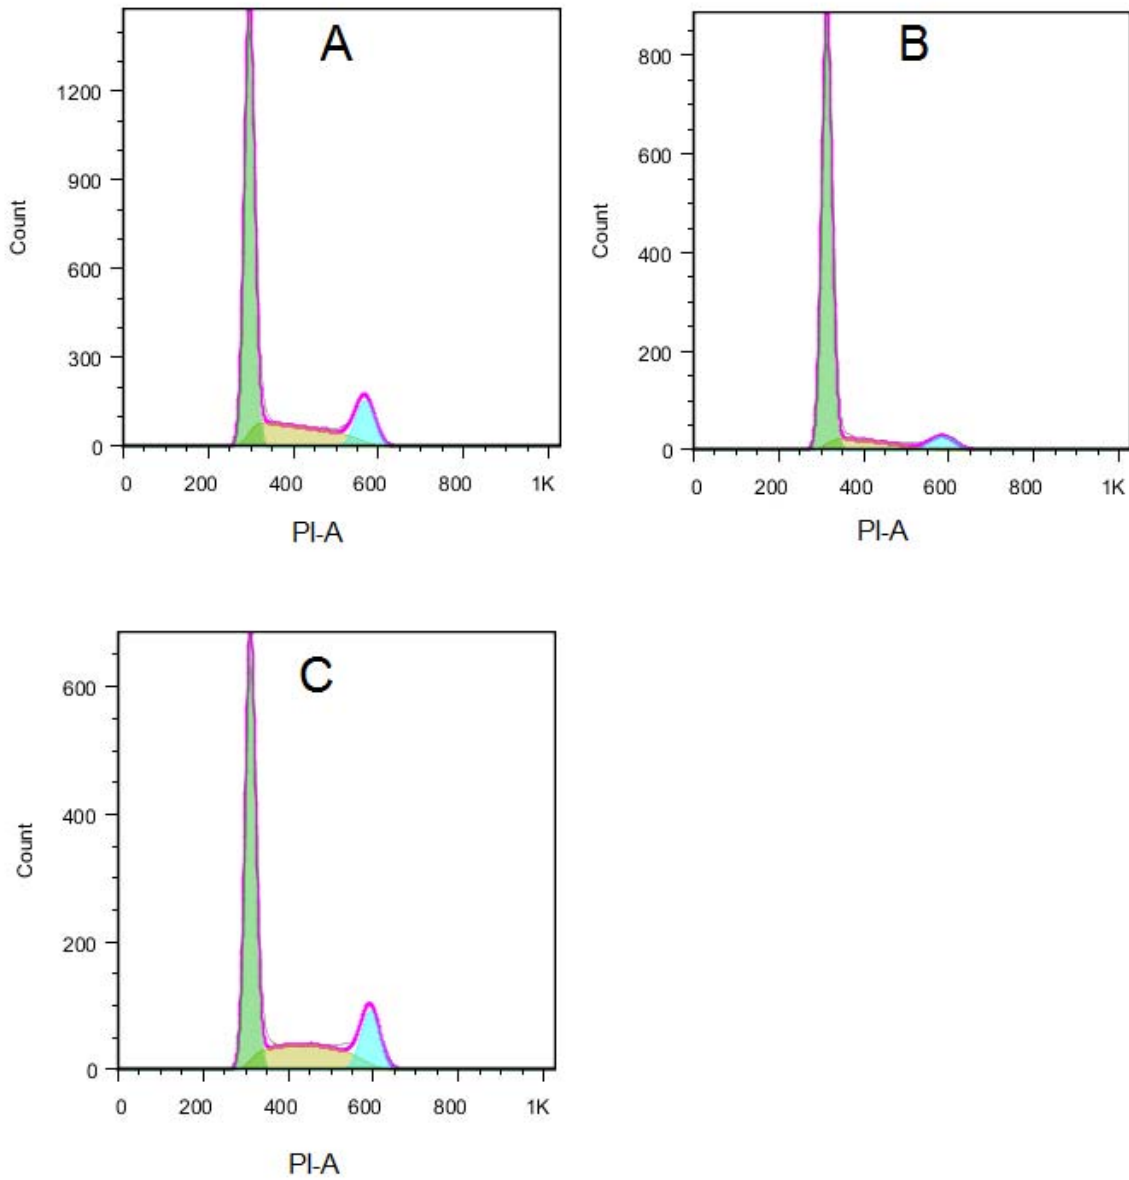

**Supplementary Figure 3. Deconvolution of DNA content histograms for Hey cells transfected with (A) negative control miRNA, (B) miR-7, and (C) miR-128 by the Watson Pragmatic model.** Green, yellow and cyan areas correspond to cells in G0/G1, S and G2/M phases of the cell cycle, respectively. PI-A: fluorescence intensity of propidium iodide (CV<6% for all G0/G1 peaks).

**Supplementary Table 1. Differentially expressed genes in miR-7 transfected HEY cells.** Genes differentially expressed (fold change  $\geq 1.4$ , FDR  $\leq 5\%$ ) in HEY ovarian cancer cells transfected with miR-7 compared to HEY cells transfected with negative control miRNA (miR-NC). ‘Probeset ID’ refers to Affymetrix HG-U133 Plus 2.0 probeset identifier. ‘Gene Symbol’ shows the official gene symbol for the corresponding Probeset ID. ‘miR7-miR-NC’ refers to the difference between average  $\log_2$  signal values (*i.e.* the  $\log_2$  of the ratio of signal values) of the miR-7 transfected group and the miR-NC transfected group. ‘q-value (%)’ shows the false discovery rate calculated using the SAM algorithm. miRanda predicted targets of miR-7 are listed in the column titled ‘miR7tgts\_M’, TargetScan predicted targets of miR-7 are listed under the heading miR-7tgts\_TS, and predicted PicTar targets of miR-7 are listed under the heading miR-7tgts\_PT.

| Probeset ID | Gene Symbol | miR7-miRNC   | q-value(%)  | miR-7 tgts_M | miR-7 tgts_TS | miR-7 tgts_PT |
|-------------|-------------|--------------|-------------|--------------|---------------|---------------|
| 235348_at   | ABHD13      | -0.934249333 | 3.671565177 | ABHD13       |               |               |
| 207268_x_at | ABI2        | 0.503142     | 4.235240967 |              | ABI2          |               |
| 225098_at   | ABI2        | 0.589023333  | 3.075356134 |              | ABI2          |               |
| 231321_s_at | ACER3       | -0.942571333 | 0.587554882 | ACER3        |               |               |
| 222687_s_at | ACER3       | -0.742688333 | 1.259835547 | ACER3        |               |               |
| 222688_at   | ACER3       | -0.648128667 | 1.259835547 | ACER3        |               |               |
| 227776_at   | ACER3       | -1.250583667 | 0           | ACER3        |               |               |
| 200793_s_at | ACO2        | -1.451693667 | 1.164891419 | ACO2         |               |               |
| 201963_at   | ACSL1       | -0.630158    | 3.121720166 |              |               |               |
| 209765_at   | ADAM19      | -1.124628667 | 1.79815454  |              |               |               |
| 220866_at   | ADAMTS6     | -0.849758333 | 1.79815454  |              |               |               |
| 237217_at   | ADAMTSL1    | -1.236878333 | 3.671565177 |              |               |               |
| 224371_at   | ADAMTSL1    | -1.150468    | 2.485389855 |              |               |               |

| Probeset ID  | Gene Symbol | miR7-<br>miRNC | q-value(%)  | miR-7<br>tgts_M | miR-7<br>tgts_TS | miR-7<br>tgts_PT |
|--------------|-------------|----------------|-------------|-----------------|------------------|------------------|
| 227113_at    | ADHFE1      | 0.555978       | 1.79815454  |                 |                  |                  |
| 212500_at    | ADO         | -1.253696      | 0           |                 |                  |                  |
| 212502_at    | ADO         | -0.924597333   | 0.884241011 |                 |                  |                  |
| 225108_at    | AGPS        | -0.914143333   | 3.267378371 | AGPS            |                  |                  |
| 238855_at    | AHNAK       | -1.076481667   | 4.235240967 | AHNAK           |                  |                  |
| 226665_at    | AHSA2       | -0.623571333   | 3.121720166 |                 |                  |                  |
| 232810_at    | AIG1        | -1.203369      | 0.587554882 | AIG1            |                  |                  |
| 230520_at    | AIG1        | -0.606927      | 4.522982336 | AIG1            |                  |                  |
| 225342_at    | AK3L1       | -0.991323333   | 2.485389855 |                 |                  |                  |
| 204347_at    | AK3L1       | -0.664979333   | 4.235240967 |                 |                  |                  |
| 222862_s_at  | AK5         | 0.533551       | 1.79815454  |                 |                  |                  |
| 210517_s_at  | AKAP12      | 0.697011667    | 1.79815454  |                 |                  |                  |
| 1556841_a_at | ALDH1L2     | -1.716318      | 0           |                 |                  |                  |
| 231202_at    | ALDH1L2     | -1.628134667   | 0           |                 |                  |                  |
| 1559393_at   | ALDH1L2     | -1.517756667   | 0           |                 |                  |                  |
| 204174_at    | ALOX5AP     | -0.74708       | 4.235240967 |                 |                  |                  |
| 202920_at    | ANK2        | -1.192487      | 0           | ANK2            |                  |                  |
| 202921_s_at  | ANK2        | -0.666925333   | 1.79815454  | ANK2            |                  |                  |
| 1554471_a_at | ANKRD13C    | -0.912919333   | 1.79815454  |                 |                  |                  |
| 223418_x_at  | ANKRD13C    | -0.702445667   | 4.522982336 |                 |                  |                  |
| 229307_at    | ANKRD28     | -1.261974667   | 0           | ANKRD28         |                  |                  |
| 226025_at    | ANKRD28     | -0.9043        | 2.345471612 | ANKRD28         |                  |                  |
| 213035_at    | ANKRD28     | -0.779184      | 0.587554882 | ANKRD28         |                  |                  |
| 225735_at    | ANKRD50     | -0.929331333   | 1.202805955 |                 |                  |                  |
| 227660_at    | ANTXR1      | -0.839906667   | 3.121720166 |                 |                  |                  |
| 213454_at    | APITD1      | 0.858506667    | 1.336284421 |                 |                  |                  |
| 211404_s_at  | APLP2       | -0.681913333   | 3.671565177 | APLP2           |                  |                  |
| 221087_s_at  | APOL3       | -1.624035333   | 0.884241011 |                 |                  |                  |

| Probeset ID | Gene Symbol | miR7-<br>miRNC | q-value(%)  | miR-7<br>tgts_M | miR-7<br>tgts_TS | miR-7<br>tgts_PT |
|-------------|-------------|----------------|-------------|-----------------|------------------|------------------|
| 1557236_at  | APOL6       | -1.268496      | 0.587554882 |                 |                  |                  |
| 219716_at   | APOL6       | -0.982219333   | 1.259835547 |                 |                  |                  |
| 201096_s_at | ARF4        | -0.6237        | 3.121720166 | ARF4            |                  | ARF4             |
| 225171_at   | ARHGAP18    | -0.913321667   | 3.267378371 |                 |                  |                  |
| 225166_at   | ARHGAP18    | -0.798673667   | 1.79815454  |                 |                  |                  |
| 1560821_at  | ARHGAP22    | -0.719731      | 2.485389855 |                 |                  |                  |
| 211716_x_at | ARHGDI A    | 0.612537333    | 2.485389855 |                 |                  |                  |
| 202206_at   | ARL4C       | -0.804041333   | 1.259835547 |                 | ARL4C            | ARL4C            |
| 219637_at   | ARMC9       | 1.366374667    | 1.79815454  |                 |                  |                  |
| 206129_s_at | ARSB        | -1.019458333   | 1.259835547 | ARSB            |                  |                  |
| 205047_s_at | ASNS        | -1.40403       | 0           |                 |                  |                  |
| 225008_at   | ASPH        | -0.920992      | 4.235240967 | ASPH            |                  |                  |
| 218857_s_at | ASRGL1      | 1.82704        | 1.79815454  |                 |                  |                  |
| 207076_s_at | ASS1        | -1.785531333   | 2.652723034 |                 |                  |                  |
| 222709_at   | ATG7        | -0.915890667   | 1.164891419 |                 |                  |                  |
| 209281_s_at | ATP2B1      | -0.509994      | 4.235240967 |                 |                  |                  |
| 212136_at   | ATP2B4      | -1.032477667   | 4.235240967 | ATP2B4          |                  |                  |
| 212135_s_at | ATP2B4      | -0.897951667   | 4.235240967 | ATP2B4          |                  |                  |
| 226302_at   | ATP8B1      | -0.588692      | 2.345471612 |                 |                  |                  |
| 205416_s_at | ATXN3       | -0.548166667   | 4.235240967 |                 |                  |                  |
| 212475_at   | AVL9        | -0.728865667   | 2.345471612 |                 |                  |                  |
| 212471_at   | AVL9        | -0.684653333   | 1.164891419 |                 |                  |                  |
| 203188_at   | B3GNT1      | 0.594666333    | 1.336284421 |                 |                  |                  |
| 206233_at   | B4GALT6     | 0.565187       | 3.671565177 |                 |                  |                  |
| 206232_s_at | B4GALT6     | 0.875351667    | 2.485389855 |                 |                  |                  |
| 224335_s_at | BACE1       | -1.073999      | 4.235240967 | BACE1           | BACE1            | BACE1            |
| 228189_at   | BAG4        | -0.792539333   | 1.259835547 |                 |                  |                  |
| 227896_at   | BCCIP       | -0.838288      | 2.652723034 | BCCIP           |                  |                  |



| Probeset ID | Gene Symbol       | miR7-<br>miRNC | q-value(%)  | miR-7<br>tgts_M | miR-7<br>tgts_TS | miR-7<br>tgts_PT |
|-------------|-------------------|----------------|-------------|-----------------|------------------|------------------|
| 218264_at   | BCCIP             | -0.762422333   | 4.235240967 | BCCIP           |                  |                  |
| 227143_s_at | BID               | -0.692035      | 3.121720166 |                 |                  |                  |
| 205289_at   | BMP2              | -1.512856667   | 3.121720166 |                 |                  |                  |
| 209308_s_at | BNIP2             | -0.643826667   | 2.345471612 |                 |                  |                  |
| 231960_at   | BRWD1             | -0.595151      | 4.235240967 | BRWD1           | BRWD1            |                  |
| 207485_x_at | BTN3A1            | -1.359866333   | 0           |                 |                  |                  |
| 209846_s_at | BTN3A2            | -1.026154333   | 0           |                 |                  |                  |
| 212613_at   | BTN3A2            | -1.009746      | 1.259835547 |                 |                  |                  |
| 204820_s_at | BTN3A2 /// BTN3A3 | -0.925859      | 2.345471612 |                 |                  |                  |
| 38241_at    | BTN3A3            | -1.032930333   | 3.671565177 |                 |                  |                  |
| 225192_at   | C10orf46          | 0.861095333    | 2.485389855 |                 |                  |                  |
| 227257_s_at | C10orf46          | 1.360522333    | 2.652723034 |                 |                  |                  |
| 52164_at    | C11orf24          | -1.032017667   | 1.164891419 | C11orf24        |                  |                  |
| 221534_at   | C11orf68          | -1.249860667   | 4.522982336 | C11orf68        |                  |                  |
| 204521_at   | C12orf24          | 0.734646333    | 2.652723034 |                 |                  |                  |
| 229778_at   | C12orf39          | -1.621159333   | 4.522982336 |                 |                  |                  |
| 1553987_at  | C12orf47          | -0.709361      | 3.671565177 |                 |                  |                  |
| 1560426_at  | C12orf55          | -0.722036667   | 4.235240967 |                 |                  |                  |
| 219563_at   | C14orf139         | -0.858455      | 4.235240967 |                 |                  |                  |
| 212736_at   | C16orf45          | 1.336602667    | 0           |                 |                  |                  |
| 230721_at   | C16orf52          | -0.570776333   | 2.485389855 |                 |                  |                  |
| 229071_at   | C17orf100         | 0.913176333    | 3.075356134 |                 |                  |                  |
| 228452_at   | C17orf39          | -1.333441667   | 0.884241011 | C17orf39        |                  |                  |
| 220058_at   | C17orf39          | -0.676747      | 4.522982336 | C17orf39        |                  |                  |
| 238166_s_at | C17orf51          | -0.807785333   | 4.235240967 |                 |                  |                  |
| 228146_at   | C17orf51          | -0.684836      | 4.235240967 |                 |                  |                  |
| 212055_at   | C18orf10          | -0.600639333   | 4.235240967 | C18orf10        |                  |                  |
| 1553338_at  | C1orf55           | -0.724618333   | 4.235240967 | C1orf55         |                  |                  |

| Probeset ID  | Gene Symbol      | miR7-<br>miRNC | q-value(%)  | miR-7<br>tgts_M | miR-7<br>tgts_TS | miR-7<br>tgts_PT |
|--------------|------------------|----------------|-------------|-----------------|------------------|------------------|
| 224693_at    | C20orf108        | 0.707014333    | 0.967238362 |                 |                  |                  |
| 224690_at    | C20orf108        | 0.830417667    | 0.967238362 |                 |                  |                  |
| 1554818_s_at | C20orf12         | 0.634711333    | 3.671565177 |                 |                  |                  |
| 225313_at    | C20orf177        | -1.010335667   | 1.336284421 | C20orf177       |                  |                  |
| 1553311_at   | C20orf197        | -1.755140333   | 4.235240967 |                 |                  |                  |
| 223951_at    | C21orf116        | -0.715518667   | 3.121720166 |                 |                  |                  |
| 1559901_s_at | C21orf34         | -0.874869333   | 1.259835547 | C21orf34        |                  |                  |
| 242565_x_at  | C21orf57         | 1.240048333    | 0.488023728 |                 |                  |                  |
| 36552_at     | C2CD3            | 0.561834667    | 1.79815454  |                 |                  |                  |
| 1553158_at   | C3orf34          | 0.535698667    | 3.671565177 |                 |                  |                  |
| 1562953_s_at | C4orf12          | -0.748492333   | 0           |                 |                  |                  |
| 227856_at    | C4orf32          | -0.756391333   | 4.235240967 |                 |                  |                  |
| 203738_at    | C5orf22          | -1.322204333   | 0           | C5orf22         | C5orf22          |                  |
| 1552660_a_at | C5orf22          | -1.218008333   | 0           | C5orf22         | C5orf22          |                  |
| 219029_at    | C5orf28          | -0.755382333   | 1.259835547 |                 |                  |                  |
| 238635_at    | C5orf28          | -1.090266667   | 0.884241011 |                 |                  |                  |
| 220324_at    | C6orf155         | -0.708793333   | 1.259835547 |                 |                  |                  |
| 210410_s_at  | C6orf26 /// MSH5 | 0.691512       | 3.075356134 |                 |                  |                  |
| 227000_at    | C7orf41          | 0.663013667    | 2.345471612 |                 |                  |                  |
| 235866_at    | C9orf85          | 0.911754333    | 3.267378371 |                 |                  |                  |
| 213688_at    | CALM1            | 0.710425       | 1.336284421 |                 |                  |                  |
| 200623_s_at  | CALM3            | -1.321739      | 1.164891419 | CALM3           |                  |                  |
| 200622_x_at  | CALM3            | -1.054822333   | 4.522982336 | CALM3           |                  |                  |
| 200757_s_at  | CALU             | -0.83004       | 1.336284421 | CALU            | CALU             | CALU             |
| 200756_x_at  | CALU             | -0.7102        | 2.485389855 | CALU            | CALU             | CALU             |
| 200755_s_at  | CALU             | -0.592016667   | 3.267378371 | CALU            | CALU             | CALU             |
| 214845_s_at  | CALU             | -0.566416667   | 4.235240967 | CALU            | CALU             | CALU             |
| 224994_at    | CAMK2D           | -1.020761      | 0           | CAMK2D          | CAMK2D           |                  |

| Probeset ID  | Gene Symbol | miR7-<br>miRNC | q-value(%)  | miR-7<br>tgts_M | miR-7<br>tgts_TS | miR-7<br>tgts_PT |
|--------------|-------------|----------------|-------------|-----------------|------------------|------------------|
| 225019_at    | CAMK2D      | -0.86719       | 4.522982336 | CAMK2D          | CAMK2D           |                  |
| 210787_s_at  | CAMKK2      | -1.347015333   | 0           | CAMKK2          |                  |                  |
| 208838_at    | CAND1       | -0.800467      | 1.336284421 | CAND1           |                  | CAND1            |
| 239771_at    | CAND1       | -0.884525333   | 1.259835547 | CAND1           |                  | CAND1            |
| 213547_at    | CAND2       | -0.896886667   | 4.522982336 |                 |                  |                  |
| 208374_s_at  | CAPZA1      | -0.964162333   | 1.164891419 | CAPZA1          |                  | CAPZA1           |
| 204950_at    | CARD8       | -0.792443333   | 4.235240967 |                 |                  |                  |
| 1554479_a_at | CARD8       | -0.820563667   | 3.671565177 |                 |                  |                  |
| 206011_at    | CASP1       | -0.887094667   | 3.121720166 | CASP1           |                  |                  |
| 212097_at    | CAV1        | -0.892259333   | 2.485389855 | CAV1            |                  |                  |
| 225231_at    | CBL         | -0.769676      | 0.884241011 |                 |                  |                  |
| 243475_at    | CBL         | -0.742550667   | 4.522982336 |                 |                  |                  |
| 212816_s_at  | CBS         | -1.027109667   | 0.884241011 | CBS             |                  |                  |
| 1553972_a_at | CBS         | -0.907156667   | 0.587554882 | CBS             |                  |                  |
| 1555920_at   | CBX3        | -0.713528      | 1.336284421 |                 |                  |                  |
| 1560599_a_at | CCDC123     | 0.677689       | 2.652723034 |                 |                  |                  |
| 1554512_a_at | CCDC123     | 0.976173       | 3.075356134 |                 |                  |                  |
| 232489_at    | CCDC76      | -0.913534333   | 2.485389855 | CCDC76          | CCDC76           | CCDC76           |
| 218175_at    | CCDC92      | 1.032029333    | 4.235240967 |                 |                  |                  |
| 205899_at    | CCNA1       | 1.717766333    | 0           | CCNA1           |                  |                  |
| 200952_s_at  | CCND2       | -0.905452333   | 0           |                 |                  |                  |
| 211434_s_at  | CCRL2       | -1.093904667   | 4.235240967 |                 |                  |                  |
| 229900_at    | CD109       | -0.85771       | 3.121720166 |                 |                  |                  |
| 226545_at    | CD109       | -0.784628      | 2.652723034 |                 |                  |                  |
| 210743_s_at  | CDC14A      | 0.848836333    | 1.336284421 | CDC14A          |                  |                  |
| 209288_s_at  | CDC42EP3    | -0.704293333   | 4.235240967 |                 |                  |                  |
| 224428_s_at  | CDCA7       | -0.766242333   | 2.485389855 |                 |                  |                  |
| 234932_s_at  | CDCP1       | -0.815387667   | 1.164891419 |                 |                  |                  |

| Probeset ID | Gene Symbol | miR7-miRNC   | q-value(%)  | miR-7 tgts_M | miR-7 tgts_TS | miR-7 tgts_PT |
|-------------|-------------|--------------|-------------|--------------|---------------|---------------|
| 224851_at   | CDK6        | -0.772117333 | 1.259835547 |              |               |               |
| 209112_at   | CDKN1B      | -0.569535667 | 3.267378371 |              |               |               |
| 212864_at   | CDS2        | 0.750268     | 0.884241011 |              |               |               |
| 226449_at   | CEP120      | -0.726862667 | 2.485389855 |              |               |               |
| 224352_s_at | CFL2        | -0.791701    | 0           |              |               |               |
| 219270_at   | CHAC1       | -1.550980333 | 2.485389855 | CHAC1        |               |               |
| 228999_at   | CHD2        | -0.948332333 | 1.164891419 |              |               |               |
| 226350_at   | CHML        | -0.694081667 | 4.235240967 |              |               |               |
| 226314_at   | CHST14      | 1.39496      | 0           |              |               |               |
| 200998_s_at | CKAP4       | -1.215276667 | 1.259835547 | CKAP4        | CKAP4         | CKAP4         |
| 200999_s_at | CKAP4       | -1.190297667 | 1.164891419 | CKAP4        | CKAP4         | CKAP4         |
| 212306_at   | CLASP2      | -0.683096333 | 4.235240967 | CLASP2       | CLASP2        |               |
| 211709_s_at | CLEC11A     | -1.119912667 | 0.884241011 |              |               |               |
| 201560_at   | CLIC4       | -0.584176667 | 3.671565177 | CLIC4        |               |               |
| 226017_at   | CMTM7       | -0.783440333 | 1.259835547 |              |               |               |
| 202163_s_at | CNOT8       | -1.345856333 | 0           | CNOT8        | CNOT8         | CNOT8         |
| 202164_s_at | CNOT8       | -1.266676667 | 1.202805955 | CNOT8        | CNOT8         | CNOT8         |
| 202162_s_at | CNOT8       | -0.735841    | 1.164891419 | CNOT8        | CNOT8         | CNOT8         |
| 226751_at   | CNRIP1      | -1.187306333 | 0           |              |               |               |
| 203073_at   | COG2        | -0.737239333 | 3.121720166 |              |               |               |
| 211343_s_at | COL13A1     | -1.633290333 | 0           | COL13A1      |               |               |
| 225293_at   | COL27A1     | -0.730513    | 4.235240967 |              |               |               |
| 221729_at   | COL5A2      | -0.991497    | 1.202805955 | COL5A2       |               |               |
| 226934_at   | CPSF6       | -0.928021667 | 3.121720166 |              |               |               |
| 201990_s_at | CREBL2      | 0.731282333  | 4.235240967 |              |               |               |
| 209967_s_at | CREM        | -0.603597333 | 3.267378371 |              |               |               |
| 207630_s_at | CREM        | -0.521365    | 2.652723034 |              |               |               |
| 226656_at   | CRTAP       | -1.402645333 | 1.202805955 |              |               |               |

| Probeset ID  | Gene Symbol                        | miR7-<br>miRNC | q-value(%)  | miR-7<br>tgts_M | miR-7<br>tgts_TS | miR-7<br>tgts_PT |
|--------------|------------------------------------|----------------|-------------|-----------------|------------------|------------------|
| 1555889_a_at | CRTAP                              | -1.377131667   | 0           |                 |                  |                  |
| 227138_at    | CRTAP                              | -1.153451333   | 4.522982336 |                 |                  |                  |
| 201380_at    | CRTAP                              | -1.061394667   | 0           |                 |                  |                  |
| 1554464_a_at | CRTAP                              | -0.80016       | 2.485389855 |                 |                  |                  |
| 240221_at    | CSNK1A1                            | -0.942355667   | 3.121720166 |                 |                  |                  |
| 229665_at    | CSTF3                              | -0.793617      | 1.259835547 |                 |                  |                  |
| 208735_s_at  | CTDSP2                             | -1.067301333   | 1.336284421 |                 | CTDSP2           |                  |
| 201904_s_at  | CTDSPL                             | -1.043472667   | 1.336284421 | CTDSPL          |                  |                  |
| 206085_s_at  | CTH                                | -0.906001667   | 1.164891419 |                 |                  |                  |
| 219080_s_at  | CTPS2                              | -0.933936      | 3.267378371 |                 |                  |                  |
| 201370_s_at  | CUL3                               | -0.823882667   | 4.522982336 |                 |                  |                  |
| 232466_at    | CUL4A                              | -0.778637667   | 1.79815454  |                 |                  |                  |
| 203531_at    | CUL5                               | -0.710311333   | 3.267378371 | CUL5            | CUL5             |                  |
| 203533_s_at  | CUL5                               | -0.548173667   | 3.671565177 | CUL5            | CUL5             |                  |
| 204470_at    | CXCL1                              | -1.523311333   | 0           |                 |                  |                  |
| 209774_x_at  | CXCL2                              | -1.359100333   | 0           | CXCL2           |                  |                  |
| 219179_at    | DACT1                              | -1.111032333   | 1.164891419 |                 |                  |                  |
| 200794_x_at  | DAZAP2                             | -0.855724      | 3.121720166 | DAZAP2          |                  |                  |
| 218094_s_at  | DBNDD2 /// SYS1 ///<br>SYS1-DBNDD2 | 0.898224       | 2.652723034 |                 |                  |                  |
| 228106_at    | DCAF16                             | -0.531252      | 4.522982336 |                 |                  |                  |
| 220172_at    | DCAF17                             | -1.034532667   | 0.587554882 |                 |                  |                  |
| 224730_at    | DCAF7                              | -1.500802      | 3.121720166 | DCAF7           |                  |                  |
| 222925_at    | DCDC2                              | -0.855561      | 2.485389855 |                 |                  |                  |
| 204296_at    | DCTN1                              | -0.958904      | 3.671565177 |                 |                  |                  |
| 243711_at    | DDAH1                              | -0.60428       | 3.671565177 |                 |                  |                  |
| 209383_at    | DDIT3 /// NR1H3                    | -0.761831      | 4.235240967 |                 |                  |                  |
| 202887_s_at  | DDIT4                              | -2.187503667   | 0.884241011 | DDIT4           | DDIT4            | DDIT4            |

| Probeset ID  | Gene Symbol  | miR7-<br>miRNC | q-value(%)  | miR-7<br>tgts_M | miR-7<br>tgts_TS | miR-7<br>tgts_PT |
|--------------|--------------|----------------|-------------|-----------------|------------------|------------------|
| 205168_at    | DDR2         | -0.720583333   | 2.345471612 |                 |                  |                  |
| 227561_at    | DDR2         | -0.714136667   | 4.522982336 |                 |                  |                  |
| 225442_at    | DDR2         | -0.649201667   | 4.522982336 |                 |                  |                  |
| 224654_at    | DDX21        | -0.88558       | 4.235240967 |                 |                  |                  |
| 219641_at    | DET1         | -1.007442667   | 4.522982336 | DET1            |                  |                  |
| 202533_s_at  | DHFR         | 0.634782667    | 4.522982336 |                 |                  |                  |
| 202532_s_at  | DHFR         | 0.658043333    | 3.075356134 |                 |                  |                  |
| 1558342_x_at | DIXDC1       | 0.857792667    | 0           |                 |                  |                  |
| 214724_at    | DIXDC1       | 0.886852       | 3.671565177 |                 |                  |                  |
| 1558340_at   | DIXDC1       | 0.898065667    | 0           |                 |                  |                  |
| 220572_at    | DKFZp547G183 | -0.935759667   | 1.79815454  |                 |                  |                  |
| 230229_at    | DLG1         | -0.849842      | 1.79815454  |                 |                  |                  |
| 243938_x_at  | DNAH5        | 1.165058667    | 0.884241011 |                 |                  |                  |
| 212817_at    | DNAJB5       | 0.804281333    | 2.345471612 |                 |                  |                  |
| 205003_at    | DOCK4        | -0.844925667   | 2.652723034 |                 |                  |                  |
| 209691_s_at  | DOK4         | 0.713829667    | 0.967238362 |                 |                  |                  |
| 203716_s_at  | DPP4         | -1.017578667   | 4.522982336 |                 |                  |                  |
| 201430_s_at  | DPYSL3       | 0.933444333    | 0           | DPYSL3          |                  |                  |
| 225228_at    | DRAM2        | -0.821912      | 4.522982336 |                 |                  |                  |
| 203635_at    | DSCR3        | -0.654742667   | 4.522982336 |                 |                  |                  |
| 211493_x_at  | DTNA         | 0.596403333    | 2.345471612 | DTNA            |                  |                  |
| 225415_at    | DTX3L        | -0.741281333   | 3.267378371 |                 |                  |                  |
| 219469_at    | DYNC2H1      | 0.692893       | 2.652723034 | DYNC2H1         |                  |                  |
| 1561939_at   | DYNC2H1      | 0.752620667    | 2.485389855 | DYNC2H1         |                  |                  |
| 225494_at    | DYNLL2       | 1.000013       | 0.967238362 |                 |                  |                  |
| 241713_s_at  | DYX1C1       | 1.064675       | 4.235240967 |                 |                  |                  |
| 211607_x_at  | EGFR         | -0.616986667   | 4.522982336 | EGFR            | EGFR             |                  |
| 209037_s_at  | EHD1         | -1.432172      | 4.522982336 | EHD1            | EHD1             |                  |

| Probeset ID  | Gene Symbol | miR7-<br>miRNC | q-value(%)  | miR-7<br>tgts_M | miR-7<br>tgts_TS | miR-7<br>tgts_PT |
|--------------|-------------|----------------|-------------|-----------------|------------------|------------------|
| 233660_at    | EHD4        | -1.571905      | 0           |                 |                  |                  |
| 1556607_at   | EHD4        | -1.166487333   | 3.267378371 |                 |                  |                  |
| 209536_s_at  | EHD4        | -0.87014       | 3.671565177 |                 |                  |                  |
| 228967_at    | EIF1        | -0.686682333   | 2.652723034 |                 |                  |                  |
| 201017_at    | EIF1AX      | -0.548122      | 4.235240967 |                 |                  |                  |
| 222576_s_at  | EIF2C1      | -0.564634333   | 4.235240967 |                 | EIF2C1           | EIF2C1           |
| 224936_at    | EIF2S3      | -0.578356667   | 3.121720166 | EIF2S3          |                  |                  |
| 224935_at    | EIF2S3      | -0.542473333   | 3.121720166 | EIF2S3          |                  |                  |
| 214805_at    | EIF4A1      | -0.843098      | 3.121720166 |                 |                  |                  |
| 1555996_s_at | EIF4A2      | -0.665303333   | 1.259835547 |                 |                  |                  |
| 31845_at     | ELF4        | 0.839981       | 2.345471612 |                 |                  |                  |
| 203490_at    | ELF4        | 0.652643667    | 2.652723034 |                 |                  |                  |
| 226099_at    | ELL2        | -0.859892667   | 3.121720166 |                 |                  |                  |
| 226982_at    | ELL2        | -0.576571667   | 4.522982336 |                 |                  |                  |
| 213895_at    | EMP1        | -1.271489667   | 1.336284421 |                 |                  |                  |
| 225078_at    | EMP2        | 0.671409667    | 2.345471612 |                 |                  |                  |
| 212336_at    | EPB41L1     | 0.729266333    | 3.075356134 |                 |                  |                  |
| 206114_at    | EPHA4       | -0.785929333   | 0           | EPHA4           |                  |                  |
| 210753_s_at  | EPHB1       | -1.588063      | 0           | EPHB1           |                  |                  |
| 230425_at    | EPHB1       | -1.49045       | 0           | EPHB1           |                  |                  |
| 211898_s_at  | EPHB1       | -1.189079667   | 3.121720166 | EPHB1           |                  |                  |
| 210385_s_at  | ERAP1       | -0.614447      | 3.267378371 |                 |                  |                  |
| 212580_at    | ERAP1       | -0.578651      | 4.522982336 |                 |                  |                  |
| 228131_at    | ERCC1       | -1.06454       | 1.79815454  |                 |                  |                  |
| 213365_at    | ERI2        | -0.641929333   | 3.267378371 | ERI2            |                  |                  |
| 221543_s_at  | ERLIN2      | -1.380031667   | 0           | ERLIN2          |                  |                  |
| 208958_at    | ERP44       | -0.761450333   | 0           | ERP44           |                  |                  |
| 224657_at    | ERRFI1      | -0.968132333   | 1.79815454  |                 |                  |                  |

| Probeset ID  | Gene Symbol | miR7-<br>miRNC | q-value(%)  | miR-7<br>tgts_M | miR-7<br>tgts_TS | miR-7<br>tgts_PT |
|--------------|-------------|----------------|-------------|-----------------|------------------|------------------|
| 201574_at    | ETF1        | 0.560095333    | 3.267378371 |                 |                  |                  |
| 204774_at    | EVI2A       | -0.838887      | 4.235240967 |                 |                  |                  |
| 204603_at    | EXO1        | 0.909993333    | 0.884241011 |                 |                  |                  |
| 214507_s_at  | EXOSC2      | -0.854102      | 2.485389855 | EXOSC2          | EXOSC2           |                  |
| 209527_at    | EXOSC2      | -0.607609333   | 4.522982336 | EXOSC2          | EXOSC2           |                  |
| 217490_at    | EXOSC6      | -0.613708667   | 1.336284421 |                 |                  |                  |
| 209537_at    | EXTL2       | -0.739207667   | 1.259835547 |                 |                  |                  |
| 203358_s_at  | EZH2        | 0.515519667    | 3.267378371 |                 |                  |                  |
| 226905_at    | FAM101B     | -0.633648333   | 3.121720166 |                 |                  |                  |
| 223059_s_at  | FAM107B     | -0.674381      | 2.652723034 |                 | FAM17B           |                  |
| 223058_at    | FAM107B     | -0.669111      | 3.121720166 |                 | FAM17B           |                  |
| 1557129_a_at | FAM111B     | 1.175139333    | 3.671565177 |                 |                  |                  |
| 1557128_at   | FAM111B     | 1.204887667    | 1.202805955 |                 |                  |                  |
| 1569024_at   | FAM13A      | -1.238234      | 0           | FAM13A          |                  |                  |
| 1569025_s_at | FAM13A      | -0.939806667   | 0           | FAM13A          |                  |                  |
| 1557385_at   | FAM161A     | 0.797169667    | 2.345471612 |                 |                  |                  |
| 212017_at    | FAM168B     | -0.856380333   | 3.121720166 | FAM168B         | FAM168B          |                  |
| 226752_at    | FAM174A     | -0.581110667   | 3.121720166 |                 |                  |                  |
| 243011_at    | FAM55C      | 0.819736667    | 1.79815454  |                 |                  |                  |
| 235030_at    | FAM55C      | 0.897649667    | 0.967238362 |                 |                  |                  |
| 243606_at    | FAM55C      | 0.958509333    | 1.336284421 |                 |                  |                  |
| 203184_at    | FBN2        | -0.808324      | 4.522982336 |                 |                  |                  |
| 241736_at    | FBXW2       | -0.537070667   | 3.671565177 |                 | FBXW2            |                  |
| 229419_at    | FBXW7       | -0.681468      | 4.235240967 |                 |                  |                  |
| 1552721_a_at | FGF1        | -1.803147667   | 0           |                 |                  |                  |
| 208240_s_at  | FGF1        | -1.712672667   | 0           |                 |                  |                  |
| 205117_at    | FGF1        | -1.349569      | 0.587554882 |                 |                  |                  |
| 210973_s_at  | FGFR1       | -0.907155667   | 4.522982336 |                 |                  |                  |



| Probeset ID | Gene Symbol | miR7-<br>miRNC | q-value(%)  | miR-7<br>tgts_M | miR-7<br>tgts_TS | miR-7<br>tgts_PT |
|-------------|-------------|----------------|-------------|-----------------|------------------|------------------|
| 222956_at   | FIGN        | 0.852729       | 0.967238362 |                 |                  |                  |
| 1558308_at  | FLJ33297    | -0.848847333   | 4.522982336 |                 |                  |                  |
| 1556033_at  | FLJ39739    | -1.138749      | 0           |                 |                  |                  |
| 232249_at   | FMNL3       | -0.743451667   | 3.671565177 |                 |                  |                  |
| 215245_x_at | FMR1        | -0.516229667   | 4.522982336 |                 |                  |                  |
| 212464_s_at | FN1         | -0.655773333   | 2.652723034 |                 |                  |                  |
| 211719_x_at | FN1         | -0.63965       | 3.267378371 |                 |                  |                  |
| 216442_x_at | FN1         | -0.62945       | 2.652723034 |                 |                  |                  |
| 210495_x_at | FN1         | -0.62431       | 3.121720166 |                 |                  |                  |
| 213056_at   | FRMD4B      | -1.004611667   | 3.121720166 | FRMD4B          |                  |                  |
| 225464_at   | FRMD6       | -0.607033333   | 4.235240967 |                 |                  |                  |
| 208782_at   | FSTL1       | -0.821716667   | 1.79815454  | FSTL1           |                  |                  |
| 214211_at   | FTH1        | -0.831765333   | 3.267378371 |                 |                  |                  |
| 222811_at   | FTSJD1      | -0.750995      | 3.671565177 |                 |                  |                  |
| 214094_at   | FUBP1       | -1.357703      | 0           |                 |                  |                  |
| 214093_s_at | FUBP1       | -0.576453667   | 1.336284421 |                 |                  |                  |
| 208841_s_at | G3BP2       | -0.847398      | 4.235240967 | G3BP2           | G3BP2            | G3BP2            |
| 221759_at   | G6PC3       | 0.65483        | 3.267378371 |                 |                  |                  |
| 227428_at   | GABPA       | -0.638312333   | 4.235240967 |                 |                  |                  |
| 218313_s_at | GALNT7      | -0.890303667   | 2.652723034 | GALNT7          |                  | GALNT7           |
| 227517_s_at | GAS5        | -0.730173333   | 1.79815454  |                 |                  |                  |
| 1560402_at  | GAS5        | -0.588273333   | 3.267378371 |                 |                  |                  |
| 225430_at   | GATC        | 0.508744       | 4.522982336 |                 |                  |                  |
| 231577_s_at | GBP1        | -1.154603      | 0.587554882 |                 |                  |                  |
| 202269_x_at | GBP1        | -1.026829667   | 1.164891419 |                 |                  |                  |
| 223434_at   | GBP3        | -0.62089       | 4.235240967 |                 |                  |                  |
| 203765_at   | GCA         | -1.18384       | 4.235240967 |                 |                  |                  |
| 219821_s_at | GFOD1       | -0.636643333   | 3.121720166 |                 |                  |                  |

| Probeset ID  | Gene Symbol | miR7-<br>miRNC | q-value(%)  | miR-7<br>tgts_M | miR-7<br>tgts_TS | miR-7<br>tgts_PT |
|--------------|-------------|----------------|-------------|-----------------|------------------|------------------|
| 205100_at    | GFPT2       | -0.669665667   | 1.336284421 |                 |                  |                  |
| 243502_at    | GJC1        | -0.612254      | 1.164891419 | GJC1            | GJC1             |                  |
| 228776_at    | GJC1        | -0.573069667   | 4.235240967 | GJC1            | GJC1             |                  |
| 214430_at    | GLA         | 0.652549       | 2.652723034 |                 |                  |                  |
| 200681_at    | GLO1        | -0.909495667   | 3.671565177 | GLO1            |                  |                  |
| 221447_s_at  | GLT8D2      | -1.130248667   | 0           |                 |                  |                  |
| 235371_at    | GLT8D4      | -0.742504667   | 0           |                 |                  |                  |
| 215001_s_at  | GLUL        | -0.864536      | 2.652723034 |                 |                  |                  |
| 221628_s_at  | GLYR1       | 0.671594667    | 1.202805955 |                 |                  |                  |
| 235233_s_at  | GMEB1       | -0.760359667   | 3.671565177 |                 |                  |                  |
| 235232_at    | GMEB1       | -1.000150333   | 3.267378371 |                 |                  |                  |
| 225420_at    | GPAM        | -0.886147      | 3.267378371 | GPAM            |                  |                  |
| 225424_at    | GPAM        | -0.793781      | 2.652723034 | GPAM            |                  |                  |
| 230369_at    | GPR161      | 0.716365333    | 2.652723034 |                 |                  |                  |
| 209409_at    | GRB10       | -0.864713      | 2.345471612 |                 |                  |                  |
| 218469_at    | GREM1       | -1.651188      | 0           | GREM1           |                  |                  |
| 218468_s_at  | GREM1       | -1.632119333   | 0           | GREM1           |                  |                  |
| 226881_at    | GRPEL2      | -0.671769667   | 1.164891419 |                 |                  |                  |
| 225276_at    | GSPT1       | -1.136835333   | 0.884241011 | GSPT1           |                  |                  |
| 219770_at    | GTDC1       | 0.549109       | 4.235240967 |                 |                  |                  |
| 221892_at    | H6PD        | -0.959188667   | 0.587554882 |                 |                  |                  |
| 226160_at    | H6PD        | -0.917473333   | 3.267378371 |                 |                  |                  |
| 222685_at    | HAUS6       | -0.853378667   | 1.164891419 |                 |                  |                  |
| 203821_at    | HBEGF       | -1.063623      | 2.652723034 |                 |                  |                  |
| 38037_at     | HBEGF       | -1.058676      | 3.121720166 |                 |                  |                  |
| 1568746_a_at | hCG_1654703 | -2.137198      | 0           |                 |                  |                  |
| 238422_at    | hCG_1811732 | 0.977125       | 1.233540637 |                 |                  |                  |
| 225012_at    | HDLBP       | -1.070912667   | 0           | HDLBP           | HDLBP            |                  |

| Probeset ID  | Gene Symbol | miR7-miRNC   | q-value(%)  | miR-7 tgts_M | miR-7 tgts_TS | miR-7 tgts_PT |
|--------------|-------------|--------------|-------------|--------------|---------------|---------------|
| 233642_s_at  | HEATR5B     | -0.623326667 | 4.235240967 | HEATR5B      |               |               |
| 44783_s_at   | HEY1        | -1.550026667 | 0           |              |               |               |
| 218839_at    | HEY1        | -1.070523    | 1.164891419 |              |               |               |
| 1553402_a_at | HFE         | -0.741104667 | 2.652723034 |              |               |               |
| 223073_at    | HIATL1      | -1.112165    | 3.671565177 | HIATL1       |               |               |
| 212291_at    | HIPK1       | 0.617595333  | 1.79815454  | HIPK1        |               |               |
| 202934_at    | HK2         | -1.224419    | 2.345471612 | HK2          |               |               |
| 209068_at    | HNRPDL      | -0.863323667 | 0           |              |               |               |
| 205601_s_at  | HOXB5       | -0.758956    | 3.121720166 | HOXB5        |               | HOXB5         |
| 202557_at    | HSPA13      | -0.740381667 | 3.267378371 |              |               |               |
| 200690_at    | HSPA9       | -0.594157    | 0.587554882 |              |               |               |
| 203960_s_at  | HSPB11      | 0.656703333  | 2.345471612 |              |               |               |
| 219998_at    | HSPC159     | 0.844315667  | 1.336284421 |              |               |               |
| 215485_s_at  | ICAM1       | -0.851862333 | 3.121720166 |              |               |               |
| 204569_at    | ICK         | -0.701909    | 4.522982336 |              |               |               |
| 225615_at    | IFFO2       | 0.825340333  | 1.202805955 |              |               |               |
| 214453_s_at  | IFI44       | -1.689571    | 2.652723034 |              |               |               |
| 222519_s_at  | IFT57       | 0.664064333  | 0.967238362 |              |               |               |
| 212143_s_at  | IGFBP3      | 1.917721667  | 0.967238362 |              |               |               |
| 39402_at     | IL1B        | -1.452849    | 0           |              |               |               |
| 205067_at    | IL1B        | -1.467005333 | 0           |              |               |               |
| 205227_at    | IL1RAP      | -1.550110667 | 0           |              |               |               |
| 206693_at    | IL7         | -0.983392667 | 1.79815454  |              |               |               |
| 205798_at    | IL7R        | -1.179825333 | 0           |              |               |               |
| 211506_s_at  | IL8         | -1.644915    | 0           |              |               |               |
| 202859_x_at  | IL8         | -2.790871667 | 1.79815454  |              |               |               |
| 214493_s_at  | INADL       | 0.605393     | 2.652723034 |              |               |               |
| 213643_s_at  | INPP5B      | -0.884047    | 1.259835547 | INPP5B       |               |               |

| Probeset ID  | Gene Symbol       | miR7-<br>miRNC | q-value(%)  | miR-7<br>tgts_M | miR-7<br>tgts_TS | miR-7<br>tgts_PT |
|--------------|-------------------|----------------|-------------|-----------------|------------------|------------------|
| 235283_at    | INTS6             | -0.628273667   | 3.121720166 |                 |                  |                  |
| 200994_at    | IPO7              | -1.064822667   | 0           | IPO7            |                  |                  |
| 200995_at    | IPO7              | -0.993921667   | 3.121720166 | IPO7            |                  |                  |
| 200993_at    | IPO7              | -0.699516667   | 3.121720166 | IPO7            |                  |                  |
| 1554739_at   | IPP               | -0.561747333   | 4.522982336 |                 |                  |                  |
| 215130_s_at  | IQCK              | 1.093483       | 0           |                 |                  |                  |
| 213392_at    | IQCK              | 1.144875667    | 2.345471612 |                 |                  |                  |
| 204686_at    | IRS1              | -0.880808667   | 3.267378371 | IRS1            | IRS1             |                  |
| 235057_at    | ITCH              | -0.649007667   | 4.235240967 | ITCH            |                  | ITCH             |
| 227792_at    | ITPRIPL2          | -1.271248667   | 1.79815454  |                 |                  |                  |
| 1568619_s_at | ITPRIPL2          | -0.888665333   | 3.267378371 |                 |                  |                  |
| 225142_at    | JHDM1D            | -1.039806333   | 0.587554882 |                 | JHDM1D           |                  |
| 218418_s_at  | KANK2             | 1.068694667    | 0.884241011 |                 |                  |                  |
| 212447_at    | KBTBD2            | -0.692199      | 2.485389855 | KBTBD2          | KBTBD2           |                  |
| 214595_at    | KCNG1             | -0.991521667   | 2.652723034 |                 |                  |                  |
| 212188_at    | KCTD12            | -0.78182       | 4.235240967 |                 |                  |                  |
| 218310_at    | KCTD7 /// RABGEF1 | -0.653316333   | 3.671565177 |                 |                  |                  |
| 201549_x_at  | KDM5B             | -0.662096333   | 3.267378371 | KDM5B           |                  |                  |
| 211202_s_at  | KDM5B             | -0.729085      | 0           | KDM5B           |                  |                  |
| 231031_at    | KGFLP2            | -1.521108      | 0           |                 |                  |                  |
| 212056_at    | KIAA0182          | 0.584176667    | 2.652723034 | KIAA0182        | KIAA182          |                  |
| 202181_at    | KIAA0247          | -1.090836      | 3.267378371 | KIAA0247        | KIAA247          |                  |
| 212314_at    | KIAA0746          | -1.868745      | 0           |                 |                  |                  |
| 212311_at    | KIAA0746          | -1.410239      | 0           |                 |                  |                  |
| 230232_at    | KIAA0746          | -1.249311333   | 0.587554882 |                 |                  |                  |
| 1559601_at   | KIAA2018          | -0.937686      | 0.587554882 |                 | KIAA218          |                  |
| 227433_at    | KIAA2018          | -0.873415333   | 1.164891419 |                 | KIAA218          |                  |
| 224662_at    | KIF5B             | -0.59615       | 3.121720166 | KIF5B           |                  |                  |

| Probeset ID  | Gene Symbol               | miR7-<br>miRNC | q-value(%)  | miR-7<br>tgts_M | miR-7<br>tgts_TS | miR-7<br>tgts_PT |
|--------------|---------------------------|----------------|-------------|-----------------|------------------|------------------|
| 220825_s_at  | KIRREL                    | -0.772344      | 1.202805955 |                 |                  |                  |
| 225140_at    | KLF3                      | -0.638833667   | 3.121720166 |                 |                  |                  |
| 225133_at    | KLF3                      | -0.60824       | 4.235240967 |                 |                  |                  |
| 221841_s_at  | KLF4                      | -1.294014667   | 0           | KLF4            | KLF4             | KLF4             |
| 220266_s_at  | KLF4                      | -1.064316333   | 1.259835547 | KLF4            | KLF4             | KLF4             |
| 209255_at    | KLHDC10                   | -0.670668333   | 2.345471612 |                 |                  |                  |
| 212882_at    | KLHL18                    | -0.910570333   | 0.587554882 |                 |                  |                  |
| 218587_s_at  | KTELC1                    | 0.506082667    | 3.267378371 |                 |                  |                  |
| 209270_at    | LAMB3                     | -0.580993333   | 4.522982336 |                 |                  |                  |
| 200771_at    | LAMC1                     | -0.73233       | 2.652723034 |                 |                  |                  |
| 202267_at    | LAMC2                     | -1.270863333   | 0           |                 |                  |                  |
| 223380_s_at  | LATS2                     | 0.597402667    | 1.336284421 |                 |                  |                  |
| 218604_at    | LEMD3                     | -0.729039667   | 3.121720166 | LEMD3           | LEMD3            | LEMD3            |
| 207170_s_at  | LETMD1                    | -0.70346       | 3.671565177 |                 |                  |                  |
| 227771_at    | LIFR                      | -0.661857      | 3.671565177 |                 |                  |                  |
| 218850_s_at  | LIMD1                     | -0.927072333   | 2.652723034 | LIMD1           |                  |                  |
| 200706_s_at  | LITAF                     | -1.526414      | 0           |                 |                  |                  |
| 200704_at    | LITAF                     | -1.270465      | 0           |                 |                  |                  |
| 202674_s_at  | LMO7                      | -0.662218      | 2.485389855 |                 |                  |                  |
| 227578_at    | LOC100128191              | 0.956306667    | 1.336284421 |                 |                  |                  |
| 227406_at    | LOC100129387              | -0.579716333   | 3.671565177 |                 |                  |                  |
| 1558782_a_at | LOC100130557              | -0.834155      | 3.267378371 |                 |                  |                  |
| 226526_s_at  | LOC100130905              | -1.078553      | 1.202805955 |                 |                  |                  |
| 227074_at    | LOC100131564              | -1.027196667   | 1.164891419 |                 |                  |                  |
| 1557783_at   | LOC100133991              | 0.606983667    | 3.671565177 |                 |                  |                  |
| 229685_at    | LOC100134937              | 0.952088667    | 2.485389855 |                 |                  |                  |
| 225785_at    | LOC100289942 ///<br>REEP3 | -1.107265333   | 1.259835547 |                 |                  |                  |

| Probeset ID  | Gene Symbol         | miR7-<br>miRNC | q-value(%)  | miR-7<br>tgts_M | miR-7<br>tgts_TS | miR-7<br>tgts_PT |
|--------------|---------------------|----------------|-------------|-----------------|------------------|------------------|
| 243092_at    | LOC100290367        | -1.005412      | 4.522982336 |                 |                  |                  |
| 227136_s_at  | LOC100292024        | 1.33364        | 3.075356134 |                 |                  |                  |
| 235191_at    | LOC148189           | -0.972376667   | 3.121720166 |                 |                  |                  |
| 230502_s_at  | LOC149832           | 0.674781333    | 4.522982336 |                 |                  |                  |
| 1555847_a_at | LOC284454           | -1.289552667   | 0           |                 |                  |                  |
| 233737_s_at  | LOC284561           | -1.723565667   | 0           |                 |                  |                  |
| 232689_at    | LOC284561           | -1.700749      | 0           |                 |                  |                  |
| 1556896_at   | LOC284751           | 0.507893333    | 0.488023728 |                 |                  |                  |
| 235606_at    | LOC344595           | 0.935697667    | 1.233540637 | LOC344595       |                  |                  |
| 239466_at    | LOC344595           | 1.020400667    | 0.488023728 | LOC344595       |                  |                  |
| 235205_at    | LOC346887           | -0.706917667   | 2.652723034 |                 |                  |                  |
| 232001_at    | LOC439949           | -0.600382333   | 1.202805955 |                 |                  |                  |
| 1555858_at   | LOC440944           | -0.768911667   | 3.671565177 |                 |                  |                  |
| 227474_at    | LOC654433           | -0.820439      | 2.485389855 | LOC654433       |                  |                  |
| 228425_at    | LOC654433           | -0.713548333   | 4.522982336 | LOC654433       |                  |                  |
| 231247_s_at  | LOC727820           | -0.788250667   | 1.259835547 |                 |                  |                  |
| 227384_s_at  | LOC727820           | -0.773393667   | 1.259835547 |                 |                  |                  |
| 227383_at    | LOC727820           | -0.714555333   | 2.345471612 |                 |                  |                  |
| 1568763_s_at | LOC728613 /// PDCD6 | -0.589180667   | 3.267378371 |                 |                  |                  |
| 214291_at    | LOC729046 /// RPL17 | -0.963140667   | 2.652723034 |                 |                  |                  |
| 231808_at    | LOC729082           | -0.778646      | 0           | LOC729082       |                  |                  |
| 228808_s_at  | LOXL2               | -1.743451667   | 0.587554882 |                 |                  |                  |
| 220816_at    | LPAR3               | -1.267253667   | 4.522982336 |                 |                  |                  |
| 213615_at    | LPCAT3              | -0.756959333   | 2.652723034 |                 |                  |                  |
| 1557360_at   | LRPPRC              | -1.338582667   | 3.121720166 |                 |                  |                  |
| 229231_at    | LRRC37B             | 0.550703       | 4.522982336 |                 |                  |                  |
| 201932_at    | LRRC41              | -0.829756667   | 3.267378371 |                 |                  |                  |
| 218364_at    | LRRFIP2             | -0.764148333   | 4.235240967 |                 |                  |                  |

| Probeset ID  | Gene Symbol     | miR7-<br>miRNC | q-value(%)  | miR-7<br>tgts_M | miR-7<br>tgts_TS | miR-7<br>tgts_PT |
|--------------|-----------------|----------------|-------------|-----------------|------------------|------------------|
| 220099_s_at  | LUC7L2          | -0.918849333   | 0           | LUC7L2          |                  |                  |
| 212449_s_at  | LYPLA1          | -0.816624667   | 2.345471612 | LYPLA1          |                  |                  |
| 203897_at    | LYRM1           | -1.038915      | 2.485389855 |                 |                  |                  |
| 221311_x_at  | LYRM2           | 0.715663       | 3.075356134 |                 |                  |                  |
| 226321_at    | LYSMD3          | -0.725042      | 4.235240967 |                 | LYSMD3           |                  |
| 226538_at    | MAN2A1          | -0.907624667   | 3.121720166 |                 |                  |                  |
| 205105_at    | MAN2A1          | -0.645298      | 3.671565177 |                 |                  |                  |
| 235103_at    | MAN2A1          | -0.593864333   | 3.121720166 |                 |                  |                  |
| 205447_s_at  | MAP3K12         | 1.114845       | 0.884241011 |                 |                  |                  |
| 218582_at    | MARCH5          | -0.620779667   | 1.79815454  | MARCH5          |                  |                  |
| 215512_at    | MARCH6          | -0.647366333   | 1.202805955 |                 |                  |                  |
| 221047_s_at  | MARK1           | 0.551930667    | 3.671565177 |                 |                  |                  |
| 200768_s_at  | MAT2A           | -1.299810333   | 1.202805955 |                 |                  |                  |
| 242260_at    | MATR3           | -1.638601      | 4.235240967 |                 |                  |                  |
| 1564907_s_at | MATR3 /// SNHG4 | -0.883998333   | 0.884241011 |                 |                  |                  |
| 228938_at    | MBP             | 0.907891667    | 0.967238362 |                 |                  |                  |
| 209087_x_at  | MCAM            | 0.934544667    | 3.075356134 |                 |                  |                  |
| 211340_s_at  | MCAM            | 0.990582333    | 1.79815454  |                 |                  |                  |
| 204058_at    | ME1             | -0.905962      | 4.522982336 |                 |                  |                  |
| 1555300_a_at | MED12L          | 0.951143       | 1.233540637 |                 |                  |                  |
| 215897_at    | MED25           | 1.190249667    | 0.488023728 |                 |                  |                  |
| 214831_at    | MED28           | -0.624068333   | 3.671565177 |                 |                  |                  |
| 212830_at    | MEGF9           | -0.770316667   | 1.259835547 | MEGF9           | MEGF9            |                  |
| 212831_at    | MEGF9           | -0.678113      | 3.121720166 | MEGF9           | MEGF9            |                  |
| 225955_at    | METRNL          | -1.328199333   | 1.259835547 |                 |                  |                  |
| 1552312_a_at | MFAP3           | -0.755696      | 0           |                 |                  |                  |
| 203102_s_at  | MGAT2           | -0.766612      | 3.121720166 | MGAT2           |                  |                  |
| 223974_at    | MGC11082        | -0.718998      | 2.485389855 |                 |                  |                  |

| Probeset ID  | Gene Symbol | miR7-<br>miRNC | q-value(%)  | miR-7<br>tgts_M | miR-7<br>tgts_TS | miR-7<br>tgts_PT |
|--------------|-------------|----------------|-------------|-----------------|------------------|------------------|
| 1560019_at   | MGC11082    | -0.811882667   | 3.121720166 |                 |                  |                  |
| 228235_at    | MGC16121    | -1.903165333   | 0           |                 |                  |                  |
| 229784_at    | MGC16121    | -1.791946333   | 0           |                 |                  |                  |
| 228040_at    | MGC21881    | 0.621571667    | 2.652723034 |                 |                  |                  |
| 200899_s_at  | MGEA5       | -0.601610667   | 3.121720166 |                 |                  |                  |
| 211026_s_at  | MGLL        | -1.341348      | 3.121720166 |                 |                  |                  |
| 225102_at    | MGLL        | -1.248998      | 0           |                 |                  |                  |
| 55081_at     | MICALL1     | -0.718769667   | 3.671565177 | MICALL1         |                  |                  |
| 229437_at    | MIR155HG    | -0.842209667   | 1.164891419 |                 |                  |                  |
| 232291_at    | MIR17HG     | -1.230599333   | 0           |                 |                  |                  |
| 233636_at    | MIR17HG     | -1.048502667   | 1.164891419 |                 |                  |                  |
| 224917_at    | MIR21       | -1.244892333   | 0           |                 |                  |                  |
| 1570202_a_at | MKL2        | 0.802457667    | 3.267378371 |                 |                  |                  |
| 239468_at    | MKX         | -1.029428667   | 3.121720166 |                 |                  |                  |
| 215904_at    | MLLT4       | 0.683659333    | 3.671565177 |                 |                  |                  |
| 202827_s_at  | MMP14       | -1.209085333   | 2.345471612 |                 |                  |                  |
| 214812_s_at  | MOBKL1B     | -0.998477667   | 3.121720166 |                 |                  |                  |
| 226790_at    | MORN2       | 0.653373667    | 4.522982336 | MORN2           |                  |                  |
| 217942_at    | MRPS35      | 0.568166667    | 1.79815454  |                 |                  |                  |
| 201761_at    | MTHFD2      | -1.131021667   | 2.485389855 |                 |                  |                  |
| 203433_at    | MTHFS       | 0.531792333    | 3.267378371 |                 |                  |                  |
| 216095_x_at  | MTMR1       | -0.567174      | 2.345471612 | MTMR1           |                  |                  |
| 210360_s_at  | MTSS1       | -1.153246667   | 0           |                 |                  |                  |
| 203036_s_at  | MTSS1       | -1.005807      | 1.336284421 |                 |                  |                  |
| 210359_at    | MTSS1       | -0.963849667   | 0           |                 |                  |                  |
| 202364_at    | MXI1        | -0.726356333   | 1.79815454  |                 |                  |                  |
| 227342_s_at  | MYEOV       | -0.914498667   | 3.121720166 |                 |                  |                  |
| 223130_s_at  | MYLIP       | -1.184893      | 0.587554882 |                 |                  |                  |



| Probeset ID  | Gene Symbol     | miR7-<br>miRNC | q-value(%)  | miR-7<br>tgts_M | miR-7<br>tgts_TS | miR-7<br>tgts_PT |
|--------------|-----------------|----------------|-------------|-----------------|------------------|------------------|
| 212365_at    | MYO1B           | -0.52789       | 3.121720166 |                 |                  |                  |
| 212364_at    | MYO1B           | -0.679782667   | 3.121720166 |                 |                  |                  |
| 222018_at    | NACA /// NACAP1 | -0.767312667   | 2.485389855 |                 |                  |                  |
| 229757_at    | NAF1            | -0.778863333   | 3.121720166 | NAF1            |                  |                  |
| 202944_at    | NAGA            | -0.536860333   | 3.671565177 |                 |                  |                  |
| 1556121_at   | NAP1L1          | -0.577026333   | 3.671565177 |                 |                  |                  |
| 225448_at    | NAPG            | -1.056599333   | 0           | NAPG            |                  |                  |
| 219217_at    | NARS2           | 0.632544333    | 3.075356134 |                 |                  |                  |
| 224771_at    | NAV1            | 0.766265333    | 3.075356134 | NAV1            |                  |                  |
| 225847_at    | NCEH1           | -0.900574      | 4.235240967 |                 |                  | NCEH1            |
| 211063_s_at  | NCK1            | -0.580914667   | 3.267378371 | NCK1            |                  |                  |
| 203245_s_at  | NCRNA00094      | 0.847156333    | 4.522982336 |                 |                  |                  |
| 220399_at    | NCRNA00115      | -0.713692333   | 3.267378371 |                 |                  |                  |
| 227249_at    | NDE1            | -0.628478333   | 1.336284421 |                 |                  |                  |
| 200632_s_at  | NDRG1           | -1.709222667   | 3.121720166 |                 |                  |                  |
| 209159_s_at  | NDRG4           | 1.357064333    | 0           |                 |                  |                  |
| 217773_s_at  | NDUFA4          | -1.048018333   | 0.884241011 | NDUFA4          | NDUFA4           |                  |
| 240391_at    | NDUFB2          | -0.695622667   | 3.671565177 |                 |                  |                  |
| 243357_at    | NEGR1           | 1.012096667    | 3.267378371 |                 |                  |                  |
| 1553194_at   | NEGR1           | 1.428915667    | 2.345471612 |                 |                  |                  |
| 1555082_a_at | NEK11           | 1.192521667    | 1.233540637 |                 |                  |                  |
| 226806_s_at  | NFIA            | -1.207506      | 3.267378371 |                 |                  |                  |
| 224976_at    | NFIA            | -0.881994      | 0.587554882 |                 |                  |                  |
| 223217_s_at  | NFKBIZ          | -0.640763      | 3.121720166 |                 |                  |                  |
| 227040_at    | NHLRC3          | -0.755338667   | 2.652723034 |                 |                  |                  |
| 202007_at    | NID1            | -0.71996       | 2.652723034 | NID1            |                  |                  |
| 234299_s_at  | NIN             | -0.552763667   | 2.652723034 | NIN             |                  |                  |
| 205851_at    | NME6            | -0.759152667   | 1.79815454  |                 |                  |                  |

| Probeset ID | Gene Symbol | miR7-miRNC   | q-value(%)  | miR-7 tgts_M | miR-7 tgts_TS | miR-7 tgts_PT |
|-------------|-------------|--------------|-------------|--------------|---------------|---------------|
| 209755_at   | NMNAT2      | -1.098375667 | 0           | NMNAT2       |               |               |
| 202443_x_at | NOTCH2      | -0.711596667 | 4.522982336 | NOTCH2       |               |               |
| 212377_s_at | NOTCH2      | -0.672263333 | 3.267378371 | NOTCH2       |               |               |
| 213462_at   | NPAS2       | -0.853028    | 3.121720166 |              |               |               |
| 201468_s_at | NQO1        | -1.087051667 | 2.652723034 | NQO1         |               |               |
| 212298_at   | NRP1        | -0.53694     | 3.121720166 | NRP1         |               |               |
| 1555468_at  | NRP2        | -0.857637333 | 0.587554882 |              |               |               |
| 227486_at   | NT5E        | -0.52182     | 4.522982336 |              |               |               |
| 224581_s_at | NUCKS1      | -0.687386667 | 3.121720166 | NUCKS1       |               |               |
| 201270_x_at | NUDCD3      | -1.075437667 | 4.235240967 | NUDCD3       |               |               |
| 224938_at   | NUFIP2      | -0.937140667 | 3.267378371 |              |               |               |
| 209230_s_at | NUPR1       | -2.358642667 | 0           |              |               |               |
| 209628_at   | NXT2        | -1.030856    | 0.884241011 | NXT2         | NXT2          | NXT2          |
| 220594_at   | OGT         | -1.670188    | 0           | OGT          | OGT           | OGT           |
| 209240_at   | OGT         | -1.176701333 | 0           | OGT          | OGT           | OGT           |
| 207563_s_at | OGT         | -1.083406667 | 0.587554882 | OGT          | OGT           | OGT           |
| 212307_s_at | OGT         | -1.08238     | 1.259835547 | OGT          | OGT           | OGT           |
| 207564_x_at | OGT         | -0.88482     | 3.121720166 | OGT          | OGT           | OGT           |
| 229787_s_at | OGT         | -0.730873667 | 3.121720166 | OGT          | OGT           | OGT           |
| 214306_at   | OPA1        | -0.575459333 | 3.267378371 |              |               |               |
| 208158_s_at | OSBPL1A     | -0.891697333 | 3.121720166 |              |               |               |
| 226507_at   | PAK1        | -1.119439333 | 0.587554882 | PAK1         |               |               |
| 209615_s_at | PAK1        | -0.928915    | 1.164891419 | PAK1         |               |               |
| 214607_at   | PAK3        | 1.307822333  | 0.488023728 |              |               |               |
| 201981_at   | PAPPA       | -1.232375    | 0           |              | PAPPA         | PAPPA         |
| 224941_at   | PAPPA       | -1.065846333 | 3.121720166 |              | PAPPA         | PAPPA         |
| 228237_at   | PAPPA2      | -1.675025    | 4.235240967 |              |               |               |
| 203060_s_at | PAPSS2      | -0.640308    | 1.164891419 |              |               |               |

| Probeset ID  | Gene Symbol | miR7-miRNC   | q-value(%)  | miR-7 tgts_M | miR-7 tgts_TS | miR-7 tgts_PT |
|--------------|-------------|--------------|-------------|--------------|---------------|---------------|
| 219033_at    | PARP8       | -0.525855667 | 3.121720166 |              |               |               |
| 235795_at    | PAX6        | -0.648552    | 4.522982336 | PAX6         | PAX6          |               |
| 214528_s_at  | PAX8        | -0.565310667 | 1.79815454  | PAX8         |               |               |
| 224152_s_at  | PBRM1       | 0.790726667  | 4.522982336 |              |               |               |
| 223899_at    | PBRM1       | 0.955391333  | 0.967238362 |              |               |               |
| 223900_s_at  | PBRM1       | 1.002770667  | 1.79815454  |              |               |               |
| 212151_at    | PBX1        | 1.134571667  | 0.884241011 | PBX1         |               |               |
| 202847_at    | PCK2        | -1.310621    | 0           |              |               |               |
| 224399_at    | PDCD1LG2    | -0.930666    | 3.121720166 |              |               |               |
| 204134_at    | PDE2A       | -1.22719     | 4.522982336 |              |               |               |
| 204491_at    | PDE4D       | -0.903938    | 4.522982336 | PDE4D        | PDE4D         | PDE4D         |
| 210836_x_at  | PDE4D       | -0.838599333 | 1.202805955 | PDE4D        | PDE4D         | PDE4D         |
| 210837_s_at  | PDE4D       | -0.675686333 | 4.522982336 | PDE4D        | PDE4D         | PDE4D         |
| 211840_s_at  | PDE4D       | -0.515351    | 4.235240967 | PDE4D        | PDE4D         | PDE4D         |
| 210305_at    | PDE4DIP     | 0.973508333  | 2.652723034 |              |               |               |
| 1553175_s_at | PDE5A       | -0.853903    | 3.267378371 |              |               |               |
| 221994_at    | PDLIM5      | -0.558823    | 4.235240967 | PDLIM5       |               |               |
| 208233_at    | PDPN        | -0.569332333 | 1.259835547 |              |               |               |
| 1555131_a_at | PER3        | 0.623034667  | 1.233540637 |              |               |               |
| 226823_at    | PHACTR4     | -0.588172333 | 2.652723034 | PHACTR4      | PHACTR4       |               |
| 238131_at    | PHC2        | -0.950204333 | 3.267378371 |              |               |               |
| 1554472_a_at | PHF20L1     | -0.628621333 | 2.485389855 | PHF20L1      |               |               |
| 201397_at    | PHGDH       | -0.909055667 | 1.164891419 |              |               |               |
| 217996_at    | PHLDA1      | -0.831013333 | 4.522982336 |              |               |               |
| 215285_s_at  | PHTF1       | 0.824159333  | 4.235240967 |              |               |               |
| 210191_s_at  | PHTF1       | 0.94547      | 0           |              |               |               |
| 212511_at    | PICALM      | -0.863357667 | 2.652723034 | PICALM       |               |               |
| 213070_at    | PIK3C2A     | -0.788261333 | 4.235240967 |              |               |               |

| Probeset ID  | Gene Symbol | miR7-<br>miRNC | q-value(%)  | miR-7<br>tgts_M | miR-7<br>tgts_TS | miR-7<br>tgts_PT |
|--------------|-------------|----------------|-------------|-----------------|------------------|------------------|
| 212688_at    | PIK3CB      | -0.875460333   | 2.485389855 |                 |                  |                  |
| 217620_s_at  | PIK3CB      | -0.765261333   | 3.121720166 |                 |                  |                  |
| 203879_at    | PIK3CD      | -1.244866667   | 0           | PIK3CD          | PIK3CD           |                  |
| 206369_s_at  | PIK3CG      | -0.690495667   | 3.671565177 |                 |                  |                  |
| 226864_at    | PKIA        | 0.932049333    | 0.884241011 |                 |                  |                  |
| 235110_at    | PLA2G16     | 1.19783        | 0.967238362 | PLA2G16         |                  |                  |
| 216971_s_at  | PLEC1       | -1.295646      | 3.121720166 |                 |                  | PLEC1            |
| 200827_at    | PLOD1       | -1.450998      | 3.671565177 | PLOD1           |                  |                  |
| 202620_s_at  | PLOD2       | -0.78531       | 3.671565177 |                 |                  |                  |
| 213030_s_at  | PLXNA2      | -1.456791333   | 0.587554882 |                 |                  |                  |
| 227032_at    | PLXNA2      | -0.717524333   | 2.652723034 |                 |                  |                  |
| 207290_at    | PLXNA2      | -0.689534667   | 3.121720166 |                 |                  |                  |
| 222449_at    | PMEPA1      | 0.777452333    | 3.075356134 |                 |                  |                  |
| 212037_at    | PNN         | -0.968072667   | 1.259835547 |                 |                  |                  |
| 1567213_at   | PNN         | -0.69586       | 4.235240967 |                 |                  |                  |
| 1567214_a_at | PNN         | -0.626216667   | 3.121720166 |                 |                  |                  |
| 233030_at    | PNPLA3      | -0.722142667   | 1.336284421 |                 |                  |                  |
| 204835_at    | POLA1       | 0.607854667    | 2.345471612 |                 |                  |                  |
| 208828_at    | POLE3       | -1.165725      | 1.79815454  | POLE3           |                  |                  |
| 225844_at    | POLE4       | -1.224073333   | 0           | POLE4           | POLE4            | POLE4            |
| 1553587_a_at | POLE4       | -1.04295       | 0.884241011 | POLE4           | POLE4            | POLE4            |
| 231041_at    | POLR1E      | -0.630361      | 3.121720166 |                 |                  |                  |
| 222402_at    | POMP        | -0.744544667   | 4.235240967 |                 |                  |                  |
| 212226_s_at  | PPAP2B      | -1.558204667   | 2.652723034 |                 |                  |                  |
| 212230_at    | PPAP2B      | -1.658872333   | 0           |                 |                  |                  |
| 227025_at    | PPHLN1      | -0.838864667   | 2.345471612 |                 |                  |                  |
| 227728_at    | PPM1A       | -0.552715      | 4.235240967 |                 |                  |                  |
| 1552670_a_at | PPP1R3B     | 0.921723667    | 0.884241011 |                 |                  |                  |

| Probeset ID  | Gene Symbol | miR7-<br>miRNC | q-value(%)  | miR-7<br>tgts_M | miR-7<br>tgts_TS | miR-7<br>tgts_PT |
|--------------|-------------|----------------|-------------|-----------------|------------------|------------------|
| 202886_s_at  | PPP2R1B     | -0.509599333   | 3.267378371 | PPP2R1B         |                  |                  |
| 225066_at    | PPP2R2D     | -1.361326      | 0.587554882 |                 |                  |                  |
| 201877_s_at  | PPP2R5C     | -0.705693333   | 3.671565177 |                 |                  |                  |
| 225426_at    | PPP6C       | 0.759816333    | 0.488023728 |                 |                  |                  |
| 212527_at    | PPPDE2      | -0.706798      | 1.79815454  |                 |                  |                  |
| 230708_at    | PRICKLE1    | -1.076491      | 0.587554882 |                 |                  |                  |
| 226065_at    | PRICKLE1    | -0.801137      | 2.485389855 |                 |                  |                  |
| 225984_at    | PRKAA1      | -0.626598333   | 3.121720166 |                 |                  |                  |
| 240349_at    | PRKAA2      | 0.572097667    | 2.485389855 |                 |                  |                  |
| 218236_s_at  | PRKD3       | -0.64267       | 2.652723034 | PRKD3           |                  |                  |
| 209323_at    | PRKRIR      | -0.724386      | 4.522982336 |                 |                  |                  |
| 210476_s_at  | PRLR        | -1.336604      | 0           |                 |                  |                  |
| 211917_s_at  | PRLR        | -1.330297667   | 1.79815454  |                 |                  |                  |
| 1554867_a_at | PRR16       | 0.915686333    | 0.884241011 |                 |                  |                  |
| 205618_at    | PRRG1       | -1.043651333   | 2.652723034 | PRRG1           |                  |                  |
| 229073_at    | PRTG        | -0.840633      | 4.235240967 |                 |                  |                  |
| 220892_s_at  | PSAT1       | -1.427263333   | 3.267378371 |                 |                  |                  |
| 223062_s_at  | PSAT1       | -1.25579       | 0.587554882 |                 |                  |                  |
| 208257_x_at  | PSG1        | 0.767003       | 3.267378371 |                 |                  |                  |
| 200988_s_at  | PSME3       | -1.050206      | 0           | PSME3           | PSME3            | PSME3            |
| 226110_at    | PTAR1       | -0.970493333   | 0.884241011 |                 | PTAR1            |                  |
| 235484_at    | PTAR1       | -0.800085667   | 1.259835547 |                 | PTAR1            |                  |
| 203555_at    | PTPN18      | 0.539818333    | 3.267378371 |                 |                  |                  |
| 205712_at    | PTPRD       | -0.670422667   | 4.235240967 | PTPRD           |                  |                  |
| 206157_at    | PTX3        | -2.092085667   | 0           |                 |                  |                  |
| 201607_at    | PWP1        | -0.603019667   | 1.259835547 |                 |                  |                  |
| 225796_at    | PXK         | -1.049763333   | 0           |                 |                  |                  |
| 215520_at    | PYGO1       | -0.831292667   | 1.79815454  |                 |                  |                  |

| Probeset ID  | Gene Symbol | miR7-<br>miRNC | q-value(%)  | miR-7<br>tgts_M | miR-7<br>tgts_TS | miR-7<br>tgts_PT |
|--------------|-------------|----------------|-------------|-----------------|------------------|------------------|
| 214541_s_at  | QKI         | -1.009615      | 1.164891419 |                 |                  |                  |
| 212636_at    | QKI         | -0.785281      | 3.121720166 |                 |                  |                  |
| 212265_at    | QKI         | -0.680450333   | 4.235240967 |                 |                  |                  |
| 219178_at    | QTRTD1      | -0.873926667   | 0           | QTRTD1          | QTRTD1           |                  |
| 203831_at    | R3HDM2      | -0.847478      | 3.267378371 | R3HDM2          |                  |                  |
| 34478_at     | RAB11B      | 0.535157667    | 4.522982336 |                 |                  |                  |
| 210879_s_at  | RAB11FIP5   | -1.132019333   | 3.267378371 | RAB11FIP5       | RAB11FIP5        |                  |
| 209514_s_at  | RAB27A      | 0.587926       | 2.652723034 |                 |                  |                  |
| 210951_x_at  | RAB27A      | 0.595969333    | 3.075356134 |                 |                  |                  |
| 227123_at    | RAB3B       | 0.734701       | 4.522982336 |                 |                  |                  |
| 228432_at    | RAB3IP      | 0.603784       | 4.235240967 |                 |                  |                  |
| 213704_at    | RABGGTB     | -1.683975333   | 0           |                 |                  |                  |
| 209181_s_at  | RABGGTB     | -0.92422       | 1.164891419 |                 |                  |                  |
| 209180_at    | RABGGTB     | -0.73812       | 3.121720166 |                 |                  |                  |
| 204478_s_at  | RABIF       | 0.607254       | 2.345471612 |                 |                  |                  |
| 210255_at    | RAD51L1     | 0.715874       | 2.652723034 |                 |                  |                  |
| 201244_s_at  | RAF1        | -0.749153333   | 1.202805955 | RAF1            | RAF1             | RAF1             |
| 221809_at    | RANBP10     | 0.749035333    | 1.336284421 | RANBP10         |                  |                  |
| 53987_at     | RANBP10     | 0.867540333    | 2.345471612 | RANBP10         |                  |                  |
| 208530_s_at  | RARB        | 0.729352       | 2.485389855 |                 |                  |                  |
| 210550_s_at  | RASGRF1     | 1.056664667    | 0           |                 |                  |                  |
| 236613_at    | RBM25       | -0.948649333   | 1.164891419 |                 |                  |                  |
| 226272_at    | RCAN3       | 0.641638667    | 1.79815454  |                 |                  |                  |
| 230202_at    | RELA        | -0.884386333   | 4.235240967 | RELA            |                  |                  |
| 201783_s_at  | RELA        | -1.084247667   | 0.884241011 | RELA            |                  |                  |
| 1552651_a_at | RFFL        | -0.864844333   | 4.235240967 | RFFL            |                  |                  |
| 228980_at    | RFFL        | -0.758182667   | 0           | RFFL            |                  |                  |
| 203823_at    | RGS3        | -0.966549      | 2.652723034 |                 |                  |                  |

| Probeset ID  | Gene Symbol   | miR7-<br>miRNC | q-value(%)  | miR-7<br>tgts_M | miR-7<br>tgts_TS | miR-7<br>tgts_PT |
|--------------|---------------|----------------|-------------|-----------------|------------------|------------------|
| 1554897_s_at | RHBDL2        | -0.890074667   | 3.121720166 |                 |                  |                  |
| 35685_at     | RING1         | 0.577007       | 2.485389855 |                 |                  |                  |
| 208371_s_at  | RING1         | 0.692315       | 2.485389855 |                 |                  |                  |
| 211678_s_at  | RNF114        | -1.054624667   | 1.164891419 | RNF114          |                  | RNF114           |
| 200867_at    | RNF114        | -0.963122      | 0           | RNF114          |                  | RNF114           |
| 225414_at    | RNF149        | -0.831801333   | 3.267378371 |                 |                  |                  |
| 218528_s_at  | RNF38         | -0.731113      | 3.671565177 | RNF38           |                  |                  |
| 209111_at    | RNF5          | -0.983915667   | 4.522982336 |                 |                  |                  |
| 227268_at    | RNFT1         | -0.944572667   | 1.259835547 |                 |                  |                  |
| 226877_at    | RPL32P3       | -0.834382667   | 4.235240967 |                 |                  |                  |
| 213459_at    | RPL37A        | -0.727465      | 3.671565177 |                 |                  |                  |
| 214097_at    | RPS21         | -0.715312333   | 1.259835547 |                 |                  |                  |
| 227722_at    | RPS23         | 0.953195667    | 2.485389855 |                 |                  |                  |
| 1555878_at   | RPS24         | -0.808988333   | 3.121720166 | RPS24           |                  |                  |
| 201890_at    | RRM2          | 1.162881       | 0           |                 |                  |                  |
| 225773_at    | RSPRY1        | -1.128661667   | 0.587554882 |                 |                  |                  |
| 225774_at    | RSPRY1        | -0.801426333   | 3.121720166 |                 |                  |                  |
| 201980_s_at  | RSU1          | -0.855856667   | 1.164891419 | RSU1            |                  |                  |
| 238550_at    | RUFY2         | -0.959559333   | 1.336284421 |                 |                  |                  |
| 232231_at    | RUNX2         | -1.122809      | 3.121720166 |                 |                  |                  |
| 218377_s_at  | RWDD2B        | 0.552812333    | 3.267378371 |                 |                  |                  |
| 202853_s_at  | RYK           | -1.072854      | 1.259835547 | RYK             |                  |                  |
| 214172_x_at  | RYK           | -1.063804667   | 3.121720166 | RYK             |                  |                  |
| 228923_at    | S100A6        | -1.461995667   | 3.671565177 |                 |                  |                  |
| 214456_x_at  | SAA1 /// SAA2 | -2.610745667   | 1.202805955 |                 |                  |                  |
| 208607_s_at  | SAA1 /// SAA2 | -2.395396333   | 2.345471612 |                 |                  |                  |
| 202797_at    | SACM1L        | -0.876779      | 2.485389855 | SACM1L          |                  |                  |
| 234491_s_at  | SAV1          | -0.890352      | 1.259835547 | SAV1            |                  |                  |

| <b>Probeset ID</b> | <b>Gene Symbol</b> | <b>miR7-<br/>miRNC</b> | <b>q-value(%)</b> | <b>miR-7<br/>tgts_M</b> | <b>miR-7<br/>tgts_TS</b> | <b>miR-7<br/>tgts_PT</b> |
|--------------------|--------------------|------------------------|-------------------|-------------------------|--------------------------|--------------------------|
| 222573_s_at        | SAV1               | -0.619433333           | 3.267378371       | SAV1                    |                          |                          |
| 224983_at          | SCARB2             | -1.611795              | 2.652723034       | SCARB2                  |                          |                          |
| 201646_at          | SCARB2             | -1.117837667           | 0                 | SCARB2                  |                          |                          |
| 201647_s_at        | SCARB2             | -1.013853333           | 0.587554882       | SCARB2                  |                          |                          |
| 228930_at          | SCARNA15           | -1.030062              | 1.164891419       |                         |                          |                          |
| 212900_at          | SEC24A             | -0.960971              | 3.121720166       | SEC24A                  |                          |                          |
| 230215_at          | SEC61A2            | -0.504135667           | 3.267378371       |                         |                          |                          |
| 230265_at          | SEL1L              | -0.666486667           | 3.671565177       | SEL1L                   |                          |                          |
| 229427_at          | SEMA5A             | -1.243511333           | 2.485389855       |                         |                          |                          |
| 212698_s_at        | SEPT10             | -0.742979667           | 4.522982336       | SEPT10                  |                          |                          |
| 212190_at          | SERPINE2           | -1.344465333           | 0                 |                         |                          |                          |
| 227487_s_at        | SERPINE2           | -0.952465667           | 1.259835547       |                         |                          |                          |
| 207714_s_at        | SERPINH1           | -1.461419              | 0                 | SERPINH1                |                          |                          |
| 202657_s_at        | SERTAD2            | -0.799201              | 1.79815454        |                         |                          |                          |
| 202656_s_at        | SERTAD2            | -0.660977333           | 4.522982336       |                         |                          |                          |
| 235684_s_at        | SESN3              | 1.015411667            | 1.336284421       |                         |                          |                          |
| 235683_at          | SESN3              | 1.016083333            | 1.336284421       |                         |                          |                          |
| 220200_s_at        | SETD8              | -1.073348667           | 3.121720166       | SETD8                   | SETD8                    | SETD8                    |
| 210172_at          | SF1                | -0.555828              | 3.121720166       |                         |                          |                          |
| 213370_s_at        | SFMBT1             | 0.738469667            | 2.652723034       |                         |                          |                          |
| 202037_s_at        | SFRP1              | -0.597836333           | 1.202805955       |                         |                          |                          |
| 212322_at          | SGPL1              | -1.100033333           | 1.259835547       |                         |                          |                          |
| 212321_at          | SGPL1              | -0.979887667           | 1.259835547       |                         |                          |                          |
| 208381_s_at        | SGPL1              | -0.903334667           | 0.587554882       |                         |                          |                          |
| 203320_at          | SH2B3              | -0.698961667           | 3.121720166       |                         |                          |                          |
| 209371_s_at        | SH3BP2             | -0.881833667           | 2.485389855       |                         |                          |                          |
| 217257_at          | SH3BP2             | -0.690330333           | 3.121720166       |                         |                          |                          |
| 225162_at          | SH3D19             | -0.722483667           | 3.121720166       |                         |                          |                          |



| Probeset ID | Gene Symbol | miR7-<br>miRNC | q-value(%)  | miR-7<br>tgts_M | miR-7<br>tgts_TS | miR-7<br>tgts_PT |
|-------------|-------------|----------------|-------------|-----------------|------------------|------------------|
| 220563_s_at | SHANK1      | -1.360337      | 1.164891419 |                 |                  |                  |
| 213308_at   | SHANK2      | -1.913073333   | 0           | SHANK2          | SHANK2           | SHANK2           |
| 214095_at   | SHMT2       | -0.629882667   | 3.267378371 |                 |                  |                  |
| 214096_s_at | SHMT2       | -0.613566667   | 4.522982336 |                 |                  |                  |
| 210135_s_at | SHOX2       | -0.721773333   | 0.884241011 |                 |                  |                  |
| 215856_at   | SIGLEC15    | 0.800166667    | 2.345471612 |                 |                  |                  |
| 206934_at   | SIRPB1      | -1.561482333   | 0           | SIRPB1          |                  |                  |
| 229796_at   | SIX4        | -0.973481333   | 1.79815454  |                 |                  |                  |
| 200711_s_at | SKP1        | -0.957986667   | 1.259835547 | SKP1            | SKP1             | SKP1             |
| 224844_at   | SLAIN2      | -0.751258333   | 1.259835547 | SLAIN2          |                  |                  |
| 203124_s_at | SLC11A2     | -0.941557333   | 1.164891419 |                 |                  |                  |
| 209681_at   | SLC19A2     | -0.682479333   | 2.485389855 |                 |                  |                  |
| 1569054_at  | SLC1A3      | -1.199367333   | 0           |                 |                  |                  |
| 209610_s_at | SLC1A4      | -1.000477667   | 1.259835547 |                 |                  |                  |
| 212811_x_at | SLC1A4      | -0.916372333   | 1.336284421 |                 |                  |                  |
| 212810_s_at | SLC1A4      | -1.918650667   | 0           |                 |                  |                  |
| 201920_at   | SLC20A1     | -1.074550667   | 1.164891419 |                 |                  |                  |
| 230494_at   | SLC20A1     | -0.985977      | 1.164891419 |                 |                  |                  |
| 218653_at   | SLC25A15    | -1.189347667   | 1.259835547 | SLC25A15        | SLC25A15         |                  |
| 222705_s_at | SLC25A15    | -0.809075333   | 2.652723034 | SLC25A15        | SLC25A15         |                  |
| 226217_at   | SLC30A7     | 0.937776333    | 3.267378371 |                 |                  |                  |
| 218519_at   | SLC35A5     | -0.697916      | 4.522982336 | SLC35A5         |                  |                  |
| 209711_at   | SLC35D1     | -0.770836333   | 3.267378371 |                 |                  |                  |
| 240335_at   | SLC35F5     | -1.441292      | 0           |                 |                  |                  |
| 222982_x_at | SLC38A2     | -0.710633333   | 3.121720166 | SLC38A2         | SLC38A2          | SLC38A2          |
| 227046_at   | SLC39A11    | -1.651654667   | 0           | SLC39A11        |                  |                  |
| 224596_at   | SLC44A1     | -0.877535333   | 4.522982336 |                 |                  |                  |
| 224595_at   | SLC44A1     | -0.869039333   | 2.652723034 |                 |                  |                  |

| <b>Probeset ID</b> | <b>Gene Symbol</b> | <b>miR7-<br/>miRNC</b> | <b>q-value(%)</b> | <b>miR-7<br/>tgts_M</b> | <b>miR-7<br/>tgts_TS</b> | <b>miR-7<br/>tgts_PT</b> |
|--------------------|--------------------|------------------------|-------------------|-------------------------|--------------------------|--------------------------|
| 227620_at          | SLC44A1            | -0.753985333           | 3.121720166       |                         |                          |                          |
| 1552779_a_at       | SLC44A5            | 1.104580667            | 1.233540637       |                         |                          |                          |
| 234976_x_at        | SLC4A5             | -1.197857667           | 2.485389855       |                         |                          |                          |
| 209884_s_at        | SLC4A7             | -0.865813              | 1.336284421       | SLC4A7                  |                          | SLC4A7                   |
| 1554113_a_at       | SLC4A8             | 1.238314333            | 1.79815454        |                         |                          |                          |
| 212944_at          | SLC5A3             | -0.852218667           | 1.336284421       |                         | SLC5A3                   |                          |
| 240419_at          | SLC6A15            | -0.632446              | 4.235240967       | SLC6A15                 |                          |                          |
| 217678_at          | SLC7A11            | -0.918763333           | 2.652723034       |                         |                          |                          |
| 207626_s_at        | SLC7A2             | -0.961542667           | 4.522982336       | SLC7A2                  |                          |                          |
| 225516_at          | SLC7A2             | -1.160175              | 1.202805955       | SLC7A2                  |                          |                          |
| 209679_s_at        | SMAGP              | -1.26137               | 3.121720166       | SMAGP                   |                          |                          |
| 201589_at          | SMC1A              | 0.622566               | 4.522982336       | SMC1A                   | SMC1A                    |                          |
| 204240_s_at        | SMC2               | 0.813537667            | 1.336284421       | SMC2                    |                          |                          |
| 212569_at          | SMCHD1             | -0.730611333           | 2.485389855       |                         |                          |                          |
| 212579_at          | SMCHD1             | -0.689383667           | 2.485389855       |                         |                          |                          |
| 224842_at          | SMG1               | -0.639944              | 4.522982336       | SMG1                    | SMG1                     |                          |
| 222597_at          | SNAP29             | -0.920544333           | 1.336284421       |                         |                          |                          |
| 237833_s_at        | SNCAIP             | 0.719812667            | 0.967238362       |                         |                          |                          |
| 224610_at          | SNHG1              | -0.855842667           | 4.522982336       |                         |                          |                          |
| 238691_at          | SNHG10             | -0.872975              | 4.235240967       |                         |                          |                          |
| 215011_at          | SNHG3              | -1.181054333           | 3.267378371       |                         |                          |                          |
| 1564911_at         | SNHG4              | -1.700191667           | 4.235240967       |                         |                          |                          |
| 225220_at          | SNHG8              | -1.486193333           | 4.522982336       |                         |                          |                          |
| 215224_at          | SNORA21            | -0.948382              | 2.485389855       |                         |                          |                          |
| 227655_at          | SNORD123           | -0.562317333           | 1.336284421       |                         |                          |                          |
| 242146_at          | SNRPA1             | -0.854699667           | 3.121720166       |                         |                          |                          |
| 231723_at          | SNX12              | -0.765689              | 4.522982336       |                         |                          |                          |
| 227031_at          | SNX13              | -0.525005333           | 3.267378371       |                         |                          |                          |

| Probeset ID  | Gene Symbol | miR7-<br>miRNC | q-value(%)  | miR-7<br>tgts_M | miR-7<br>tgts_TS | miR-7<br>tgts_PT |
|--------------|-------------|----------------|-------------|-----------------|------------------|------------------|
| 226178_at    | SOCS4       | -0.751036333   | 1.336284421 |                 |                  |                  |
| 226572_at    | SOCS7       | -0.792216      | 3.267378371 | SOCS7           |                  |                  |
| 221477_s_at  | SOD2        | -1.007411      | 1.336284421 |                 |                  |                  |
| 222513_s_at  | SORBS1      | -0.869642333   | 2.485389855 | SORBS1          |                  |                  |
| 212870_at    | SOS2        | -0.672741333   | 2.485389855 |                 |                  |                  |
| 223980_s_at  | SP110       | -0.779145333   | 4.235240967 |                 |                  |                  |
| 222154_s_at  | SPATS2L     | 0.80286        | 3.267378371 | SPATS2L         |                  |                  |
| 1555882_at   | SPIN3       | -0.618602333   | 2.652723034 |                 |                  |                  |
| 224995_at    | SPIRE1      | -1.154054      | 4.522982336 | SPIRE1          |                  |                  |
| 209436_at    | SPON1       | -0.856228667   | 4.235240967 |                 |                  |                  |
| 209875_s_at  | SPP1        | 1.132586       | 2.652723034 |                 |                  |                  |
| 1568574_x_at | SPP1        | 1.345295667    | 0.967238362 |                 |                  |                  |
| 226837_at    | SPRED1      | -0.651784333   | 4.522982336 |                 |                  |                  |
| 204011_at    | SPRY2       | -0.815825      | 1.79815454  |                 |                  |                  |
| 208920_at    | SRI         | -0.904760333   | 2.652723034 |                 |                  |                  |
| 229744_at    | SSFA2       | -0.813521333   | 2.652723034 |                 |                  |                  |
| 225033_at    | ST3GAL1     | -0.661016667   | 2.345471612 |                 |                  |                  |
| 214971_s_at  | ST6GAL1     | -1.215393333   | 0.587554882 |                 |                  |                  |
| 201998_at    | ST6GAL1     | -1.131418      | 4.235240967 |                 |                  |                  |
| 214970_s_at  | ST6GAL1     | -1.091385333   | 3.121720166 |                 |                  |                  |
| 1569788_at   | ST8SIA1     | -1.829504      | 0.884241011 |                 |                  |                  |
| 215505_s_at  | STRN3       | -0.510956333   | 3.121720166 | STRN3           | STRN3            | STRN3            |
| 224700_at    | STT3B       | -0.806815333   | 3.267378371 |                 |                  |                  |
| 221727_at    | SUB1        | -0.928042      | 1.336284421 |                 |                  |                  |
| 233827_s_at  | SUPT16H     | 0.601263333    | 3.671565177 |                 |                  |                  |
| 232387_at    | SYNRG       | 0.608817667    | 2.345471612 |                 |                  |                  |
| 227891_s_at  | TAF15       | -0.954017333   | 3.671565177 | TAF15           |                  |                  |
| 234168_at    | TAF15       | -0.758936667   | 1.79815454  | TAF15           |                  |                  |

| <b>Probeset ID</b> | <b>Gene Symbol</b> | <b>miR7-<br/>miRNC</b> | <b>q-value(%)</b> | <b>miR-7<br/>tgts_M</b> | <b>miR-7<br/>tgts_TS</b> | <b>miR-7<br/>tgts_PT</b> |
|--------------------|--------------------|------------------------|-------------------|-------------------------|--------------------------|--------------------------|
| 235020_at          | TAF4B              | -0.548757667           | 4.522982336       | TAF4B                   |                          |                          |
| 225973_at          | TAP2               | -0.700565667           | 1.259835547       |                         |                          |                          |
| 227407_at          | TAPT1              | -0.857053333           | 4.522982336       |                         |                          |                          |
| 240206_at          | TARS               | -1.103299333           | 4.235240967       |                         |                          |                          |
| 211052_s_at        | TBCD               | -0.815536              | 4.235240967       | TBCD                    |                          |                          |
| 233633_at          | TBL1XR1            | -0.842313667           | 3.267378371       |                         |                          |                          |
| 229706_at          | TCERG1             | -0.708525333           | 4.522982336       | TCERG1                  |                          | TCERG1                   |
| 223274_at          | TCF19              | 0.708475333            | 2.345471612       |                         |                          |                          |
| 212386_at          | TCF4               | -0.594426333           | 3.267378371       | TCF4                    | TCF4                     |                          |
| 212761_at          | TCF7L2             | -0.678958667           | 4.522982336       |                         |                          |                          |
| 232258_at          | TCTE3              | -1.536918333           | 3.121720166       |                         |                          |                          |
| 1557945_at         | TCTE3              | -1.719009              | 0                 |                         |                          |                          |
| 242939_at          | TFDP1              | -0.541832333           | 4.522982336       | TFDP1                   |                          |                          |
| 213258_at          | TFPI               | -1.07711               | 3.267378371       | TFPI                    |                          |                          |
| 209676_at          | TFPI               | -1.040796667           | 3.671565177       | TFPI                    |                          |                          |
| 208691_at          | TFRC               | -1.004519667           | 2.652723034       | TFRC                    | TFRC                     | TFRC                     |
| 207332_s_at        | TFRC               | -0.745543333           | 3.267378371       | TFRC                    | TFRC                     | TFRC                     |
| 211258_s_at        | TGFA               | -1.06985               | 0                 | TGFA                    |                          |                          |
| 205016_at          | TGFA               | -1.210024333           | 1.259835547       | TGFA                    |                          |                          |
| 220407_s_at        | TGFB2              | 1.448298               | 0                 | TGFB2                   |                          |                          |
| 208944_at          | TGFBR2             | -0.54384               | 2.485389855       |                         |                          |                          |
| 218724_s_at        | TGIF2              | 0.577946667            | 2.652723034       |                         |                          |                          |
| 201042_at          | TGM2               | -0.633246667           | 4.522982336       |                         |                          |                          |
| 203888_at          | THBD               | -1.395412333           | 1.164891419       |                         |                          |                          |
| 201109_s_at        | THBS1              | 0.632441333            | 4.235240967       |                         |                          | THBS1                    |
| 226117_at          | TIFA               | -0.918779              | 0.587554882       |                         |                          |                          |
| 1553099_at         | TIGD1              | -0.731421667           | 3.267378371       |                         |                          |                          |
| 217612_at          | TIMM50             | -1.267004667           | 4.522982336       | TIMM50                  |                          |                          |

| Probeset ID | Gene Symbol | miR7-<br>miRNC | q-value(%)  | miR-7<br>tgts_M | miR-7<br>tgts_TS | miR-7<br>tgts_PT |
|-------------|-------------|----------------|-------------|-----------------|------------------|------------------|
| 201149_s_at | TIMP3       | -2.195775667   | 0           |                 |                  |                  |
| 201150_s_at | TIMP3       | -2.729882667   | 0           |                 |                  |                  |
| 201147_s_at | TIMP3       | -1.849861667   | 0           |                 |                  |                  |
| 212665_at   | TIPARP      | -0.60784       | 4.235240967 |                 |                  |                  |
| 203220_s_at | TLE1        | 0.634178667    | 3.075356134 |                 |                  |                  |
| 203222_s_at | TLE1        | 0.750021667    | 2.652723034 |                 |                  |                  |
| 204872_at   | TLE4        | -0.619784667   | 4.522982336 |                 |                  |                  |
| 215033_at   | TM4SF1      | -1.542192667   | 3.121720166 | TM4SF1          |                  |                  |
| 224755_at   | TM9SF3      | -0.719110333   | 2.485389855 | TM9SF3          |                  |                  |
| 212352_s_at | TMED10      | -0.73499       | 3.121720166 | TMED10          |                  |                  |
| 200929_at   | TMED10      | -0.514016667   | 4.235240967 | TMED10          |                  |                  |
| 239627_at   | TMED9       | -1.077871333   | 4.235240967 | TMED9           | TMED9            | TMED9            |
| 220169_at   | TMEM156     | -0.901984      | 3.671565177 |                 |                  |                  |
| 241844_x_at | TMEM156     | -0.864624333   | 1.336284421 |                 |                  |                  |
| 213338_at   | TMEM158     | -1.41653       | 0           |                 |                  |                  |
| 212164_at   | TMEM183A    | -0.942255333   | 3.121720166 |                 |                  |                  |
| 212623_at   | TMEM41B     | -0.702701      | 4.235240967 |                 |                  |                  |
| 219410_at   | TMEM45A     | -1.440164333   | 0           |                 |                  |                  |
| 234672_s_at | TMEM48      | -0.936111667   | 1.202805955 |                 |                  |                  |
| 231697_s_at | TMEM49      | -0.974991667   | 0           |                 |                  |                  |
| 227936_at   | TMEM68      | -0.733142      | 2.485389855 | TMEM68          |                  |                  |
| 207196_s_at | TNIP1       | -0.600812667   | 4.235240967 |                 |                  |                  |
| 225765_at   | TNPO1       | -0.519644667   | 3.121720166 |                 |                  |                  |
| 235602_at   | TP53INP1    | 0.626663667    | 3.671565177 |                 |                  |                  |
| 202479_s_at | TRIB2       | -0.628485667   | 1.259835547 | TRIB2           |                  |                  |
| 202478_at   | TRIB2       | -1.429087667   | 0.587554882 | TRIB2           |                  |                  |
| 203148_s_at | TRIM14      | -0.906431333   | 1.79815454  |                 |                  |                  |
| 210995_s_at | TRIM23      | 0.865646333    | 0.488023728 | TRIM23          |                  |                  |

| Probeset ID | Gene Symbol | miR7-<br>miRNC | q-value(%)  | miR-7<br>tgts_M | miR-7<br>tgts_TS | miR-7<br>tgts_PT |
|-------------|-------------|----------------|-------------|-----------------|------------------|------------------|
| 210994_x_at | TRIM23      | 0.954428       | 0.967238362 | TRIM23          |                  |                  |
| 224806_at   | TRIM25      | -0.984163333   | 3.267378371 |                 |                  |                  |
| 221897_at   | TRIM52      | -0.694048333   | 2.485389855 | TRIM52          |                  |                  |
| 223132_s_at | TRIM8       | -1.142103667   | 2.345471612 |                 |                  |                  |
| 223131_s_at | TRIM8       | -1.016276      | 3.267378371 |                 |                  |                  |
| 221012_s_at | TRIM8       | -0.985976667   | 0           |                 |                  |                  |
| 221229_s_at | TRMT61B     | -0.721347333   | 3.267378371 |                 |                  |                  |
| 213027_at   | TROVE2      | -0.796343      | 0           |                 |                  |                  |
| 212839_s_at | TROVE2      | -0.63592       | 4.235240967 |                 |                  |                  |
| 209109_s_at | TSPAN6      | 0.649963333    | 3.267378371 |                 |                  |                  |
| 221493_at   | TSPYL1      | -0.700732667   | 4.522982336 | TSPYL1          |                  |                  |
| 225180_at   | TTC14       | -0.759574      | 0.587554882 |                 |                  |                  |
| 213174_at   | TTC9        | 0.5964         | 1.336284421 |                 |                  |                  |
| 230891_at   | TUBE1       | -1.557673667   | 0           | TUBE1           |                  |                  |
| 226181_at   | TUBE1       | -1.349856667   | 0           | TUBE1           |                  |                  |
| 201010_s_at | TXNIP       | 1.039912333    | 3.671565177 |                 |                  |                  |
| 221490_at   | UBAP1       | -0.831219333   | 1.202805955 |                 |                  |                  |
| 46270_at    | UBAP1       | -0.669415      | 1.164891419 |                 |                  |                  |
| 211764_s_at | UBE2D1      | -0.601746667   | 3.267378371 |                 |                  |                  |
| 217823_s_at | UBE2J1      | -0.560476667   | 4.522982336 | UBE2J1          |                  |                  |
| 222656_at   | UBE2W       | -0.774379667   | 1.202805955 |                 |                  |                  |
| 227413_at   | UBLCP1      | -1.130022333   | 3.121720166 | UBLCP1          | UBLCP1           | UBLCP1           |
| 212934_at   | UBXN2B      | -0.829024333   | 3.671565177 | UBXN2B          |                  |                  |
| 233245_at   | UHRF1BP1    | -1.043952667   | 2.485389855 | UHRF1BP1        |                  |                  |
| 236272_at   | UNC119B     | 0.857203       | 2.652723034 |                 |                  |                  |
| 229672_at   | UQCC        | -0.854922333   | 0.884241011 |                 |                  |                  |
| 241755_at   | UQCRC2      | -0.590119333   | 3.671565177 |                 |                  |                  |
| 209475_at   | USP15       | -0.565263667   | 1.164891419 |                 |                  |                  |

| Probeset ID  | Gene Symbol | miR7-<br>miRNC | q-value(%)  | miR-7<br>tgts_M | miR-7<br>tgts_TS | miR-7<br>tgts_PT |
|--------------|-------------|----------------|-------------|-----------------|------------------|------------------|
| 203869_at    | USP46       | -0.576425      | 4.522982336 |                 |                  |                  |
| 219675_s_at  | UXS1        | 0.543583333    | 2.652723034 |                 |                  |                  |
| 204254_s_at  | VDR         | 0.971318       | 2.345471612 |                 |                  |                  |
| 211527_x_at  | VEGFA       | -0.811529      | 3.267378371 |                 |                  |                  |
| 209946_at    | VEGFC       | -1.068400667   | 1.259835547 |                 |                  |                  |
| 212399_s_at  | VGLL4       | -0.720984333   | 2.485389855 | VGLL4           |                  |                  |
| 1555938_x_at | VIM         | -1.249948667   | 1.259835547 |                 |                  |                  |
| 209822_s_at  | VLDLR       | -1.197247      | 0.587554882 |                 |                  |                  |
| 200628_s_at  | WARS        | -0.873239      | 4.235240967 |                 |                  |                  |
| 200629_at    | WARS        | -0.768625333   | 1.79815454  |                 |                  |                  |
| 204042_at    | WASF3       | -1.427599333   | 0           | WASF3           | WASF3            |                  |
| 213836_s_at  | WIPI1       | -0.650241667   | 3.267378371 |                 |                  |                  |
| 226182_s_at  | WISP3       | -0.759793333   | 1.259835547 |                 |                  |                  |
| 212637_s_at  | WWP1        | -0.746545333   | 4.235240967 |                 | WWP1             | WWP1             |
| 212638_s_at  | WWP1        | -0.610333333   | 3.267378371 |                 | WWP1             | WWP1             |
| 228363_at    | XIAP        | -0.937778667   | 1.336284421 |                 | XIAP             |                  |
| 235222_x_at  | XIAP        | -0.797038667   | 4.522982336 |                 | XIAP             |                  |
| 212048_s_at  | YARS        | -1.029342333   | 1.259835547 |                 |                  |                  |
| 224953_at    | YIPF5       | -0.674397      | 3.267378371 | YIPF5           |                  |                  |
| 215150_at    | YOD1        | -0.689149667   | 1.164891419 | YOD1            |                  |                  |
| 218647_s_at  | YRDC        | -0.704336333   | 2.652723034 |                 |                  |                  |
| 222430_s_at  | YTHDF2      | 0.542036       | 2.485389855 |                 |                  |                  |
| 204799_at    | ZBED4       | -0.687751667   | 0.587554882 |                 |                  |                  |
| 225629_s_at  | ZBTB4       | -0.763684333   | 4.522982336 | ZBTB4           |                  | ZBTB4            |
| 231899_at    | ZC3H12C     | -0.920977333   | 0           |                 |                  |                  |
| 212402_at    | ZC3H13      | -0.535861      | 4.235240967 | ZC3H13          |                  |                  |
| 222451_s_at  | ZDHHC9      | -1.396425667   | 0.587554882 | ZDHHC9          |                  |                  |
| 228317_at    | ZFAND5      | -0.825508333   | 3.121720166 |                 |                  |                  |

| <b>Probeset ID</b> | <b>Gene Symbol</b> | <b>miR7-<br/>miRNC</b> | <b>q-value(%)</b> | <b>miR-7<br/>tgts_M</b> | <b>miR-7<br/>tgts_TS</b> | <b>miR-7<br/>tgts_PT</b> |
|--------------------|--------------------|------------------------|-------------------|-------------------------|--------------------------|--------------------------|
| 213065_at          | ZFC3H1             | -0.924743              | 4.522982336       | ZFC3H1                  |                          |                          |
| 1559270_at         | ZFHX4              | 0.522322               | 3.267378371       | ZFHX4                   |                          |                          |
| 201368_at          | ZFP36L2            | -0.638609333           | 4.235240967       |                         |                          |                          |
| 226581_at          | ZFYVE20            | -0.653507              | 1.164891419       | ZFYVE20                 |                          |                          |
| 210282_at          | ZMYM2              | -1.003531667           | 3.267378371       | ZMYM2                   |                          |                          |
| 228157_at          | ZNF207             | -0.942706              | 3.121720166       | ZNF207                  |                          |                          |
| 231848_x_at        | ZNF207             | -0.904013333           | 1.164891419       | ZNF207                  |                          |                          |
| 1556035_s_at       | ZNF207             | -0.877426333           | 2.345471612       | ZNF207                  |                          |                          |
| 219826_at          | ZNF419             | -0.830149333           | 3.267378371       |                         |                          |                          |
| 205964_at          | ZNF426             | -0.674046333           | 1.336284421       |                         |                          |                          |
| 219711_at          | ZNF586             | -0.710133              | 3.267378371       |                         |                          |                          |
| 241499_at          | ZNF621             | -0.679997333           | 3.671565177       |                         |                          |                          |
| 227122_at          | ZNF791             | -0.595340333           | 3.121720166       |                         |                          |                          |



**Supplementary Table 2. Differentially expressed genes in miR-128 transfected HEY cells.**

Differentially expressed genes (fold change  $\geq 1.4$ , FDR  $\leq 5\%$ ) in miR-128 transfected cells, compared to miR-NC transfected cells. ‘Probeset ID’ refers to Affymetrix HG-U133 Plus 2.0 probeset identifier. ‘Gene Symbol’ shows the official gene symbol for the corresponding Probeset ID. ‘miR128-miR-NC’ refers to the difference between average  $\log_2$  signal values of the miR-128 transfected group and the miR-NC transfected group. ‘q-value (%)’ shows the false discovery rate calculated using the SAM algorithm. miRanda predicted targets of miR-128 are listed in the column titled ‘miR-128tgts\_M’, TargetScan predicted targets of miR-128 are listed under the heading miR-128tgts\_TS, and PicTar predicted targets of miR-128 are listed under the heading miR-128tgts\_PT.

| Probe Set ID | Gene Symbol | miR-128-miRNC | q value (%) | miR-128 tgts_M | miR-128 tgts_TS | miR-128 tgts_PT |
|--------------|-------------|---------------|-------------|----------------|-----------------|-----------------|
| 203504_s_at  | ABCA1       | -1.2890325    | 0           | ABCA1          | ABCA1           | ABCA1           |
| 203505_at    | ABCA1       | -1.448058167  | 0           | ABCA1          | ABCA1           | ABCA1           |
| 216066_at    | ABCA1       | -1.554447667  | 3.701646186 | ABCA1          | ABCA1           | ABCA1           |
| 223320_s_at  | ABCB10      | -1.301568833  | 0.393887585 | ABCB10         |                 |                 |
| 208561_at    | ABCC9       | 1.917778      | 0           |                |                 |                 |
| 208562_s_at  | ABCC9       | 1.1849265     | 3.029425085 |                |                 |                 |
| 202850_at    | ABCD3       | 0.540919167   | 3.701646186 | ABCD3          |                 |                 |
| 213935_at    | ABHD5       | 0.5595905     | 3.701646186 |                |                 |                 |
| 221679_s_at  | ABHD6       | 0.820912167   | 0.796301331 |                |                 |                 |
| 205730_s_at  | ABLIM3      | 0.510903333   | 0.550502435 |                |                 |                 |
| 213497_at    | ABTB2       | 0.636957333   | 0.230227638 |                |                 |                 |
| 205412_at    | ACAT1       | -0.527562     | 3.701646186 |                |                 |                 |
| 202323_s_at  | ACBD3       | 0.555013333   | 1.123589586 |                |                 |                 |
| 202324_s_at  | ACBD3       | 0.6097835     | 0.550502435 |                |                 |                 |
| 222688_at    | ACER3       | 0.579175      | 1.123589586 |                |                 |                 |
| 231321_s_at  | ACER3       | 0.53604       | 0.137080273 |                |                 |                 |
| 205942_s_at  | ACSM3       | 1.900536833   | 3.701646186 |                |                 |                 |
| 219616_at    | ACSS3       | 1.1664155     | 0           |                |                 |                 |
| 229222_at    | ACSS3       | 0.7010045     | 3.701646186 |                |                 |                 |
| 200974_at    | ACTA2       | 0.57388       | 1.123589586 |                | ACTA2           |                 |
| 211995_x_at  | ACTG1       | -0.520146667  | 2.499099453 |                |                 |                 |
| 212988_x_at  | ACTG1       | -0.519393333  | 3.029425085 |                |                 |                 |
| 205209_at    | ACVR1B      | 0.717875333   | 3.029425085 |                |                 |                 |
| 208218_s_at  | ACVR1B      | 0.814223833   | 0           |                |                 |                 |
| 208223_s_at  | ACVR1B      | 0.746774833   | 3.701646186 |                |                 |                 |
| 213198_at    | ACVR1B      | 0.981891      | 0           |                |                 |                 |
| 1559548_at   | ACVR2B      | 2.1022055     | 0           |                |                 |                 |
| 220028_at    | ACVR2B      | 1.981403667   | 0           |                |                 |                 |

| Probe Set ID | Gene Symbol                               | miR-128-miRNC | q value (%) | miR-128 tgts_M | miR-128 tgts_TS | miR-128 tgts_PT |
|--------------|-------------------------------------------|---------------|-------------|----------------|-----------------|-----------------|
| 203504 s at  | ABCA1                                     | -1.2890325    | 0           | ABCA1          | ABCA1           | ABCA1           |
| 236126 at    | ACVR2B                                    | 2.224874      | 0           |                |                 |                 |
| 205260 s at  | ACYP1                                     | 0.625475333   | 1.455154512 |                |                 |                 |
| 216705 s at  | ADA                                       | 1.012514833   | 0.230227638 |                |                 |                 |
| 244463 at    | ADAM23                                    | 0.594664167   | 3.701646186 |                |                 |                 |
| 220866 at    | ADAMTS6                                   | -0.664578667  | 0           | ADAMTS6        |                 |                 |
| 1554697 at   | ADAMTS9                                   | 0.718192333   | 3.029425085 | ADAMTS9        |                 |                 |
| 226426 at    | ADNP                                      | -0.5487835    | 1.455154512 | ADNP           |                 |                 |
| 205891 at    | ADORA2B                                   | -0.877400167  | 0           | ADORA2B        | ADORA2B         | ADORA2B         |
| 206170 at    | ADRB2                                     | -1.272666833  | 0           | ADRB2          |                 |                 |
| 204184 s at  | ADRBK2                                    | 0.509439      | 0.796301331 |                |                 |                 |
| 227310 at    | ADSS                                      | 0.691361667   | 0.796301331 |                |                 |                 |
| 201792 at    | AEBP1                                     | 0.817765      | 0.137080273 |                |                 |                 |
| 1565034_s_at | AFF3 ///<br>MLL                           | 0.6259095     | 0.796301331 |                |                 |                 |
| 217939 s at  | AFTPH                                     | 0.910508333   | 0           |                |                 |                 |
| 222472 at    | AFTPH                                     | 0.767316333   | 3.701646186 |                |                 |                 |
| 218096 at    | AGPAT5                                    | 0.612708667   | 3.701646186 |                |                 |                 |
| 232007 at    | AGPAT5                                    | 1.3494965     | 0           |                |                 |                 |
| 204500 s at  | AGTPBP1                                   | 0.513328333   | 3.029425085 |                |                 |                 |
| 226115 at    | AHCTF1                                    | -0.654191667  | 0.393887585 |                |                 |                 |
| 215672 s at  | AHCYL2                                    | 0.682438833   | 2.499099453 | AHCYL2         |                 |                 |
| 211986 at    | AHNAK                                     | -0.626413333  | 0.550502435 |                |                 |                 |
| 212992 at    | AHNAK2                                    | -0.7592465    | 1.123589586 |                |                 |                 |
| 205996 s at  | AK2                                       | -1.22597      | 0           | AK2            | AK2             | AK2             |
| 212173 at    | AK2                                       | -0.58158      | 2.499099453 | AK2            | AK2             | AK2             |
| 212174 at    | AK2                                       | -1.338656     | 0           | AK2            | AK2             | AK2             |
| 212175 s at  | AK2                                       | -1.071963333  | 0           | AK2            | AK2             | AK2             |
| 204347 at    | AK3L1                                     | 0.985481667   | 0.230227638 |                |                 |                 |
| 1553502_a_at | AKAP2 ///<br>PALM2 ///<br>PALM2-<br>AKAP2 | 1.255804167   | 0           |                |                 |                 |
| 1564002 a at | AKD1                                      | 0.571346333   | 1.810509752 |                |                 |                 |
| 225701 at    | AKNA                                      | 0.607305      | 1.810509752 |                |                 |                 |
| 201272 at    | AKR1B1                                    | -0.803764833  | 1.123589586 |                |                 |                 |
| 202139 at    | AKR7A2                                    | -0.605714667  | 3.701646186 | AKR7A2         |                 |                 |
| 212607 at    | AKT3                                      | 0.596703333   | 1.455154512 | AKT3           |                 |                 |
| 212609 s at  | AKT3                                      | 0.668008      | 1.123589586 | AKT3           |                 |                 |
| 219393 s at  | AKT3                                      | 0.532755      | 1.810509752 | AKT3           |                 |                 |
| 222880 at    | AKT3                                      | 0.707581667   | 0.550502435 | AKT3           |                 |                 |
| 218373 at    | AKTIP                                     | 0.7816065     | 0.796301331 |                |                 |                 |
| 223894 s at  | AKTIP                                     | 0.710029333   | 0.05396551  |                |                 |                 |
| 203180 at    | ALDH1A3                                   | 1.718034333   | 0           |                |                 |                 |
| 1559393 at   | ALDH1L2                                   | 0.636991667   | 1.123589586 | ALDH1L2        |                 |                 |
| 202053 s at  | ALDH3A2                                   | 0.51599       | 1.810509752 | ALDH3A2        |                 |                 |
| 205640 at    | ALDH3B1                                   | -1.051461167  | 0.137080273 |                |                 |                 |
| 219015 s at  | ALG13                                     | 0.5435515     | 0.393887585 |                |                 |                 |
| 219649 at    | ALG6                                      | 0.634426      | 1.123589586 | ALG6           |                 |                 |
| 203545 at    | ALG8                                      | 0.662311667   | 1.123589586 |                |                 |                 |
| 225625 at    | ALKBH2                                    | 0.714164      | 3.029425085 |                |                 |                 |

| Probe Set ID | Gene Symbol | miR-128-miRNC | q value (%) | miR-128 tgts_M | miR-128 tgts_TS | miR-128 tgts_PT |
|--------------|-------------|---------------|-------------|----------------|-----------------|-----------------|
| 203504 s at  | ABCA1       | -1.2890325    | 0           | ABCA1          | ABCA1           | ABCA1           |
| 204174 at    | ALOX5AP     | 1.664466333   | 0           |                |                 |                 |
| 209424 s at  | AMACR       | 0.610616333   | 1.810509752 |                |                 |                 |
| 222108 at    | AMIGO2      | -0.744633     | 1.123589586 |                |                 |                 |
| 1553219 a at | AMMECR1     | 1.631660167   | 0           |                |                 |                 |
| 204976 s at  | AMMECR1     | 1.336621667   | 0.05396551  |                |                 |                 |
| 226421 at    | AMMECR1     | 1.7951395     | 0           |                |                 |                 |
| 225450 at    | AMOTL1      | 0.516324833   | 0.393887585 |                |                 |                 |
| 203002 at    | AMOTL2      | -0.73718      | 0.550502435 |                |                 |                 |
| 207992 s at  | AMPD3       | 0.621892167   | 1.123589586 |                |                 |                 |
| 239651 at    | ANAPC5      | 1.174939833   | 0           |                |                 |                 |
| 225521 at    | ANAPC7      | -0.8982025    | 1.455154512 |                |                 |                 |
| 211148 s at  | ANGPT2      | 1.234888833   | 3.701646186 | ANGPT2         |                 |                 |
| 205391 x at  | ANK1        | 1.516891167   | 3.701646186 |                | ANK1            | ANK1            |
| 208353 x at  | ANK1        | 1.352047667   | 1.455154512 |                | ANK1            | ANK1            |
| 206385 s at  | ANK3        | 1.148116333   | 0.137080273 | ANK3           |                 |                 |
| 207950 s at  | ANK3        | 0.72788       | 0           | ANK3           |                 |                 |
| 209442 x at  | ANK3        | 0.648911333   | 1.455154512 | ANK3           |                 |                 |
| 223092 at    | ANKH        | 0.74677       | 0           |                |                 |                 |
| 223094 s at  | ANKH        | 0.520049      | 1.810509752 |                |                 |                 |
| 210486 at    | ANKMY1      | 0.740091167   | 0.393887585 |                |                 |                 |
| 223251 s at  | ANKRD10     | -0.700433333  | 0           | ANKRD10        |                 |                 |
| 212289 at    | ANKRD12     | 0.593848667   | 3.029425085 |                |                 |                 |
| 238642 at    | ANKRD13D    | 0.846839333   | 0.05396551  | ANKRD13D       |                 |                 |
| 1561079 at   | ANKRD28     | -0.902397     | 0.137080273 | ANKRD28        |                 |                 |
| 213035 at    | ANKRD28     | -0.878198167  | 0           | ANKRD28        |                 |                 |
| 226025 at    | ANKRD28     | -0.84847      | 0.230227638 | ANKRD28        |                 |                 |
| 229307 at    | ANKRD28     | -1.210447     | 0.05396551  | ANKRD28        |                 |                 |
| 238332 at    | ANKRD29     | 0.54824       | 3.029425085 |                |                 |                 |
| 223542 at    | ANKRD32     | -0.656516667  | 0.796301331 |                |                 |                 |
| 227337 at    | ANKRD37     | 1.047029833   | 0.550502435 |                |                 |                 |
| 212731 at    | ANKRD46     | 1.246949667   | 0           |                |                 |                 |
| 222951 s at  | ANKRD5      | 1.621154      | 0           |                |                 |                 |
| 219496 at    | ANKRD57     | 0.923220667   | 0.393887585 |                |                 |                 |
| 227034 at    | ANKRD57     | 0.519715833   | 3.701646186 |                |                 |                 |
| 204672 s at  | ANKRD6      | 0.849068      | 0.137080273 |                |                 |                 |
| 212747 at    | ANKS1A      | 0.973421667   | 0.05396551  | ANKS1A         | ANKS1A          |                 |
| 218910 at    | ANO10       | 0.694600167   | 3.701646186 | ANO10          |                 |                 |
| 202888 s at  | ANPEP       | -0.6315255    | 1.123589586 |                |                 |                 |
| 227660 at    | ANTXR1      | -0.533176667  | 2.499099453 |                |                 |                 |
| 1553150 at   | AOF1        | 1.299071333   | 0           |                |                 |                 |
| 227021 at    | AOF1        | 1.090397833   | 0           |                |                 |                 |
| 225754 at    | AP1G1       | 0.746894      | 1.810509752 | AP1G1          |                 |                 |
| 203300 x at  | AP1S2       | 0.565851667   | 0.550502435 | AP1S2          |                 |                 |
| 231714 s at  | AP4B1       | 0.564187833   | 1.455154512 | AP4B1          |                 |                 |
| 231962 at    | AP4B1       | 0.8295375     | 2.499099453 | AP4B1          |                 |                 |
| 236221 at    | AP4B1       | 1.221504833   | 0           | AP4B1          |                 |                 |
| 220229 s at  | AP4E1       | 0.5321625     | 3.029425085 |                |                 |                 |
| 228164 at    | AP4E1       | 0.664016333   | 1.455154512 |                |                 |                 |
| 206679 at    | APBA1       | 1.432571167   | 0           |                |                 |                 |
| 228101 at    | APBA1       | 1.238016      | 0.550502435 |                |                 |                 |

| Probe Set ID | Gene Symbol | miR-128-miRNC | q value (%) | miR-128 tgts_M | miR-128 tgts_TS | miR-128 tgts_PT |
|--------------|-------------|---------------|-------------|----------------|-----------------|-----------------|
| 203504 s at  | ABCA1       | -1.2890325    | 0           | ABCA1          | ABCA1           | ABCA1           |
| 235548 at    | APCDD1L     | 0.534763833   | 2.499099453 | APCDD1L        |                 |                 |
| 221087 s at  | APOL3       | 1.027558667   | 0           |                |                 |                 |
| 1557116 at   | APOL6       | 0.610134167   | 3.701646186 |                |                 |                 |
| 219716 at    | APOL6       | 0.747502667   | 1.810509752 |                |                 |                 |
| 221031 s at  | APOLD1      | -0.518254     | 3.029425085 | APOLD1         | APOLD1          |                 |
| 214102 at    | ARAP2       | -0.677203833  | 0.05396551  |                |                 |                 |
| 200011 s at  | ARF3        | -0.646139167  | 0.393887585 |                | ARF3            |                 |
| 207606 s at  | ARHGAP12    | -0.575668333  | 0.796301331 | ARHGAP12       | ARHGAP12        | ARHGAP12        |
| 1560821 at   | ARHGAP22    | -0.579054333  | 0.550502435 |                |                 |                 |
| 205068 s at  | ARHGAP26    | 1.3401365     | 0           |                |                 |                 |
| 215955 x at  | ARHGAP26    | 1.16964       | 0.393887585 |                |                 |                 |
| 226906 s at  | ARHGAP9     | 0.923947167   | 0.796301331 |                |                 |                 |
| 215139 at    | ARHGEF10    | 1.1584695     | 3.701646186 | ARHGEF10       |                 |                 |
| 213039 at    | ARHGEF18    | 0.505324      | 2.499099453 |                |                 |                 |
| 204765 at    | ARHGEF5     | 1.196906833   | 0.05396551  |                |                 |                 |
| 235412 at    | ARHGEF7     | 1.077317167   | 0           |                |                 |                 |
| 223111 x at  | ARID4B      | 0.616460333   | 2.499099453 | ARID4B         |                 | ARID4B          |
| 238068 at    | ARIH2       | -0.617525167  | 0.230227638 |                |                 |                 |
| 229028 s at  | ARL17       | -0.648820167  | 1.810509752 |                |                 |                 |
| 202092 s at  | ARL2BP      | -0.546442     | 0           | ARL2BP         |                 |                 |
| 202206 at    | ARL4C       | -0.802072167  | 0.550502435 |                |                 |                 |
| 202207 at    | ARL4C       | -0.666493333  | 0.393887585 |                |                 |                 |
| 202208 s at  | ARL4C       | -0.696847667  | 0.796301331 |                |                 |                 |
| 213759 at    | ARL4C       | -1.044259333  | 0.550502435 |                |                 |                 |
| 218150 at    | ARL5A       | 0.694795      | 3.701646186 |                |                 |                 |
| 242727 at    | ARL5B       | 0.866140667   | 2.499099453 |                |                 |                 |
| 223735 at    | ARL6        | 0.721361667   | 1.455154512 | ARL6           |                 |                 |
| 211935 at    | ARL6IP1     | -0.603885     | 1.123589586 |                |                 |                 |
| 217852 s at  | ARL8B       | 0.589111667   | 1.455154512 | ARL8B          |                 | ARL8B           |
| 1555279 at   | ARMC8       | -0.803865     | 0           | ARMC8          | ARMC8           | ARMC8           |
| 1555281 x at | ARMC8       | -0.822949667  | 0           | ARMC8          | ARMC8           | ARMC8           |
| 219094 at    | ARMC8       | -1.360451     | 0           | ARMC8          | ARMC8           | ARMC8           |
| 219636 s at  | ARMC9       | 0.514447      | 3.701646186 |                |                 |                 |
| 227444 at    | ARMCX4      | -0.502335833  | 1.455154512 | ARMCX4         |                 |                 |
| 1563101 at   | ARNTL2      | 0.613378333   | 2.499099453 |                |                 |                 |
| 220658 s at  | ARNTL2      | 0.712288333   | 0           |                |                 |                 |
| 223586 at    | ARNTL2      | 1.000428      | 0           |                |                 |                 |
| 224204 x at  | ARNTL2      | 0.839825      | 0           |                |                 |                 |
| 223665 at    | ARPM1       | 0.734451167   | 0.05396551  |                |                 |                 |
| 218832 x at  | ARRB1       | -0.625153833  | 3.701646186 |                |                 |                 |
| 223695 s at  | ARSD        | 0.894769      | 0.796301331 |                |                 |                 |
| 223696 at    | ARSD        | 0.9920135     | 3.701646186 |                |                 |                 |
| 239147 at    | ARSK        | 0.819457167   | 0           |                |                 |                 |
| 205808 at    | ASPH        | -0.622569833  | 1.123589586 | ASPH           |                 |                 |
| 209135 at    | ASPH        | -1.100363333  | 0           | ASPH           |                 |                 |
| 210896 s at  | ASPH        | -1.195448333  | 0           | ASPH           |                 |                 |
| 225008 at    | ASPH        | -1.059891333  | 0.230227638 | ASPH           |                 |                 |
| 214993 at    | ASPHD1      | 0.507827333   | 3.029425085 |                |                 |                 |
| 219918 s at  | ASPM        | -0.541938833  | 0.550502435 |                |                 |                 |
| 232238 at    | ASPM        | -0.788898333  | 0.796301331 |                |                 |                 |

| Probe Set ID | Gene Symbol | miR-128-miRNC | q value (%) | miR-128 tgts_M | miR-128 tgts_TS | miR-128 tgts_PT |
|--------------|-------------|---------------|-------------|----------------|-----------------|-----------------|
| 203504 s at  | ABCA1       | -1.2890325    | 0           | ABCA1          | ABCA1           | ABCA1           |
| 209693 at    | ASTN2       | 0.520120167   | 3.701646186 |                |                 |                 |
| 224850 at    | ATAD1       | 0.522581667   | 3.701646186 |                |                 |                 |
| 232908 at    | ATAD2B      | 1.053269667   | 3.701646186 |                |                 |                 |
| 1558233 s at | ATF1        | 0.804484167   | 0.796301331 |                |                 |                 |
| 1565269 s at | ATF1        | 0.675098333   | 0.550502435 |                |                 |                 |
| 202672 s at  | ATF3        | 0.566412667   | 0.230227638 | ATF3           |                 |                 |
| 203952 at    | ATF6        | 0.509225      | 1.455154512 | ATF6           |                 |                 |
| 206684 s at  | ATF7        | 1.0602145     | 0           |                |                 |                 |
| 228830 s at  | ATF7        | 0.931         | 0.05396551  |                |                 |                 |
| 235160 at    | ATF7        | 0.933074667   | 0           |                |                 |                 |
| 244587 at    | ATF7        | 1.034226      | 0.137080273 |                |                 |                 |
| 232612 s at  | ATG16L1     | 0.9980395     | 0.550502435 |                |                 |                 |
| 229389 at    | ATG16L2     | 0.894641833   | 0.550502435 | ATG16L2        |                 |                 |
| 1559485 at   | ATG2B       | 0.5678935     | 0.796301331 |                |                 |                 |
| 223340 at    | ATL1        | -0.5054       | 3.701646186 |                |                 |                 |
| 1570352 at   | ATM         | 1.043292667   | 3.029425085 |                |                 |                 |
| 201855 s at  | ATMIN       | 1.086113333   | 0.05396551  |                |                 |                 |
| 213238 at    | ATP10D      | 0.541074833   | 0.550502435 |                |                 |                 |
| 212362 at    | ATP2A2      | 0.501221833   | 2.499099453 |                |                 |                 |
| 205410 s at  | ATP2B4      | 0.973074667   | 0.230227638 |                |                 |                 |
| 212135 s at  | ATP2B4      | 0.764658833   | 0.393887585 |                |                 |                 |
| 212136 at    | ATP2B4      | 0.782377833   | 0.796301331 |                |                 |                 |
| 211137 s at  | ATP2C1      | -0.645667833  | 1.455154512 |                |                 |                 |
| 236171 at    | ATP2C2      | -0.567798167  | 3.029425085 |                |                 |                 |
| 214132 at    | ATP5C1      | 1.110065333   | 0           |                |                 |                 |
| 208745 at    | ATP5L       | -0.765475833  | 0.137080273 |                |                 |                 |
| 221504 s at  | ATP6V1H     | -0.509387333  | 3.029425085 | ATP6V1H        |                 |                 |
| 219659 at    | ATP8A2      | 1.64259       | 0           |                |                 |                 |
| 219660 s at  | ATP8A2      | 1.137993333   | 3.701646186 |                |                 |                 |
| 212062 at    | ATP9A       | 0.500751667   | 2.499099453 |                | ATP9A           |                 |
| 203231 s at  | ATXN1       | 1.9079905     | 0           |                |                 |                 |
| 203232 s at  | ATXN1       | 1.1217165     | 0           |                |                 |                 |
| 208832 at    | ATXN10      | -1.053695167  | 0.137080273 | ATXN10         | ATXN1           | ATXN10          |
| 208833 s at  | ATXN10      | -0.74774      | 0.05396551  | ATXN10         | ATXN1           | ATXN10          |
| 226095 s at  | ATXN1L      | 0.626971      | 0.550502435 |                |                 |                 |
| 227373 at    | ATXN1L      | 0.761206167   | 3.701646186 |                |                 |                 |
| 205415 s at  | ATXN3       | 0.561828333   | 0.550502435 |                |                 |                 |
| 204516 at    | ATXN7       | 0.650414      | 1.810509752 | ATXN7          |                 |                 |
| 204092 s at  | AURKA       | -0.934966667  | 0.137080273 |                |                 |                 |
| 208079 s at  | AURKA       | -0.736003333  | 0.393887585 |                |                 |                 |
| 208080 at    | AURKA       | -0.852462667  | 1.455154512 |                |                 |                 |
| 218580 x at  | AURKAIP1    | -0.582230667  | 3.701646186 |                |                 |                 |
| 225552 x at  | AURKAIP1    | -0.6224585    | 3.701646186 |                |                 |                 |
| 225555 x at  | AURKAIP1    | -0.705009     | 1.810509752 |                |                 |                 |
| 219366 at    | AVEN        | 0.7664865     | 0.05396551  |                |                 |                 |
| 227100 at    | B3GALTL     | -0.753492167  | 1.455154512 |                |                 |                 |
| 222870 s at  | B3GNT2      | 0.768843      | 1.455154512 |                |                 |                 |
| 1554835 a at | B3GNT5      | 1.126444667   | 0           |                |                 |                 |
| 225612 s at  | B3GNT5      | 0.635103      | 2.499099453 |                |                 |                 |
| 201882 x at  | B4GALT1     | -0.963641     | 1.123589586 | B4GALT1        |                 |                 |

| Probe Set ID | Gene Symbol | miR-128-miRNC | q value (%) | miR-128 tgts_M | miR-128 tgts_TS | miR-128 tgts_PT |
|--------------|-------------|---------------|-------------|----------------|-----------------|-----------------|
| 203504_s_at  | ABCA1       | -1.2890325    | 0           | ABCA1          | ABCA1           | ABCA1           |
| 201883_s_at  | B4GALT1     | -1.288009833  | 0           | B4GALT1        |                 |                 |
| 211631_x_at  | B4GALT1     | -0.56589      | 1.123589586 | B4GALT1        |                 |                 |
| 216627_s_at  | B4GALT1     | -0.718119333  | 0.550502435 | B4GALT1        |                 |                 |
| 229403_at    | B4GALT1     | -0.728685     | 1.455154512 | B4GALT1        |                 |                 |
| 206232_s_at  | B4GALT6     | 1.256677167   | 0.137080273 |                |                 |                 |
| 206233_at    | B4GALT6     | 1.1835125     | 1.123589586 |                |                 |                 |
| 235333_at    | B4GALT6     | 1.098508167   | 0           |                |                 |                 |
| 234315_at    | BACH1       | -0.8152985    | 0           |                |                 |                 |
| 1558662_s_at | BANK1       | 1.502779833   | 0           |                |                 |                 |
| 222915_s_at  | BANK1       | 1.58909       | 0           |                |                 |                 |
| 212384_at    | BAT1        | 0.575168167   | 1.455154512 |                |                 |                 |
| 201255_x_at  | BAT3        | 0.645265      | 1.123589586 |                |                 |                 |
| 210208_x_at  | BAT3        | 0.584468333   | 1.455154512 |                |                 |                 |
| 213318_s_at  | BAT3        | 0.584495      | 1.455154512 |                |                 |                 |
| 209958_s_at  | BBS9        | 0.567023      | 0.796301331 |                |                 |                 |
| 37549_g_at   | BBS9        | 0.6530195     | 1.123589586 |                |                 |                 |
| 205084_at    | BCAP29      | 0.597771      | 0.550502435 |                |                 |                 |
| 218264_at    | BCCIP       | -0.582171833  | 0.796301331 |                |                 |                 |
| 219497_s_at  | BCL11A      | 1.159932667   | 0           | BCL11A         |                 | BCL11A          |
| 219498_s_at  | BCL11A      | 1.105578      | 1.810509752 | BCL11A         |                 | BCL11A          |
| 222891_s_at  | BCL11A      | 0.7592285     | 1.810509752 | BCL11A         |                 | BCL11A          |
| 222895_s_at  | BCL11B      | 1.708575      | 1.123589586 |                |                 |                 |
| 206665_s_at  | BCL2L1      | -0.661481667  | 3.701646186 |                |                 |                 |
| 212312_at    | BCL2L1      | -1.257424667  | 2.499099453 |                |                 |                 |
| 217955_at    | BCL2L13     | 0.560507667   | 0.05396551  |                |                 |                 |
| 209311_at    | BCL2L2      | 0.950831667   | 0           |                |                 |                 |
| 203796_s_at  | BCL7A       | 1.629843      | 0.550502435 |                |                 |                 |
| 1560683_at   | BCL8        | 0.896146333   | 3.701646186 |                |                 |                 |
| 228065_at    | BCL9L       | -0.698508667  | 1.810509752 |                |                 |                 |
| 206382_s_at  | BDNF        | -0.839541667  | 0           |                |                 |                 |
| 239367_at    | BDNF        | -0.846116333  | 1.455154512 |                |                 |                 |
| 1567359_at   | BDNFOS      | -1.722383667  | 0.393887585 |                |                 |                 |
| 227920_at    | BEND3       | 0.6663145     | 0.393887585 |                |                 |                 |
| 218056_at    | BFAR        | 0.716290667   | 1.455154512 |                |                 |                 |
| 1556051_a_at | BICD1       | 0.878193333   | 0.393887585 |                |                 |                 |
| 210538_s_at  | BIRC3       | 1.860895667   | 0           |                |                 |                 |
| 202094_at    | BIRC5       | -1.040222667  | 1.455154512 | BIRC5          |                 |                 |
| 202095_s_at  | BIRC5       | -0.947665833  | 1.810509752 | BIRC5          |                 |                 |
| 221478_at    | BNIP3L      | 0.625123      | 2.499099453 |                |                 |                 |
| 203502_at    | BPGM        | 0.786627833   | 0.796301331 |                |                 |                 |
| 213473_at    | BRAP        | 0.5462015     | 3.701646186 | BRAP           |                 |                 |
| 202227_s_at  | BRD8        | -0.914730167  | 0           |                |                 |                 |
| 223376_s_at  | BRI3        | -0.562231167  | 1.810509752 |                |                 |                 |
| 221703_at    | BRIP1       | -0.708904167  | 2.499099453 |                |                 |                 |
| 219280_at    | BRWD1       | 0.541428667   | 0.796301331 |                |                 |                 |
| 1553252_a_at | BRWD3       | 0.854608333   | 0.05396551  |                |                 |                 |
| 244738_at    | BRWD3       | 1.146628333   | 0.137080273 |                |                 |                 |
| 205715_at    | BST1        | -0.529531667  | 2.499099453 |                |                 |                 |
| 225389_at    | BTBD6       | 0.626390167   | 1.123589586 |                |                 |                 |
| 1556000_s_at | BTBD7       | 0.847543333   | 0           |                |                 |                 |

| Probe Set ID | Gene Symbol           | miR-128-miRNC | q value (%) | miR-128 tgts_M | miR-128 tgts_TS | miR-128 tgts_PT |
|--------------|-----------------------|---------------|-------------|----------------|-----------------|-----------------|
| 203504_s_at  | ABCA1                 | -1.2890325    | 0           | ABCA1          | ABCA1           | ABCA1           |
| 224943_at    | BTBD7                 | 1.1045675     | 0.796301331 |                |                 |                 |
| 224945_at    | BTBD7                 | 1.1410855     | 0.393887585 |                |                 |                 |
| 1569693_at   | BTBD8                 | 0.644544      | 3.701646186 |                |                 |                 |
| 238675_x_at  | BTF3L4                | 0.562466667   | 2.499099453 |                |                 |                 |
| 207485_x_at  | BTN3A1                | 0.697536167   | 1.455154512 |                |                 |                 |
| 209770_at    | BTN3A1                | 1.152715333   | 0           |                |                 |                 |
| 209846_s_at  | BTN3A2                | 0.825626667   | 0.393887585 | BTN3A2         |                 |                 |
| 212613_at    | BTN3A2                | 0.9276005     | 0.05396551  | BTN3A2         |                 |                 |
| 204820_s_at  | BTN3A2 ///<br>BTN3A3  | 0.7487675     | 0           |                |                 |                 |
| 204821_at    | BTN3A3                | 0.638410667   | 1.123589586 |                |                 |                 |
| 204901_at    | BTRC                  | 0.819848667   | 1.123589586 |                |                 |                 |
| 216091_s_at  | BTRC                  | 0.682468333   | 0.550502435 |                |                 |                 |
| 216277_at    | BUB1                  | -0.521303333  | 2.499099453 | BUB1           |                 |                 |
| 201458_s_at  | BUB3                  | -0.687018333  | 1.123589586 | BUB3           |                 |                 |
| 209974_s_at  | BUB3                  | -0.72436      | 0.393887585 | BUB3           |                 |                 |
| 223853_at    | BVES                  | 0.747241333   | 0.550502435 | BVES           |                 |                 |
| 234243_at    | BXDC5                 | -1.09763      | 3.701646186 |                |                 |                 |
| 234244_at    | BXDC5                 | -1.845528167  | 3.029425085 |                |                 |                 |
| 224664_at    | C10orf104             | 0.599195833   | 3.029425085 |                |                 |                 |
| 223703_at    | C10orf11              | 0.529778333   | 2.499099453 |                |                 |                 |
| 229399_at    | C10orf118             | 0.583668333   | 1.455154512 |                |                 |                 |
| 219601_s_at  | C10orf12              | 0.527707167   | 1.123589586 |                |                 |                 |
| 202808_at    | C10orf26              | -0.915817333  | 0           | C10orf26       | C1orf26         |                 |
| 225192_at    | C10orf46              | 0.756811      | 0.393887585 |                |                 |                 |
| 227257_s_at  | C10orf46              | 1.122039      | 0.05396551  |                |                 |                 |
| 230051_at    | C10orf47              | -0.709367167  | 1.455154512 | C10orf47       |                 |                 |
| 224435_at    | C10orf58              | 0.622309      | 1.123589586 | C10orf58       |                 |                 |
| 228155_at    | C10orf58              | 0.514093167   | 0.796301331 | C10orf58       |                 |                 |
| 232230_at    | C10orf75              | 0.5606105     | 0.796301331 |                |                 |                 |
| 238794_at    | C10orf78              | 0.742217667   | 1.810509752 |                |                 |                 |
| 219240_s_at  | C10orf88              | 0.590501333   | 0.796301331 |                |                 |                 |
| 222852_at    | C10orf88              | 0.590055833   | 1.810509752 |                |                 |                 |
| 220987_s_at  | C11orf17 ///<br>NUAK2 | 0.99237       | 1.123589586 |                |                 |                 |
| 52164_at     | C11orf24              | 0.604069      | 3.701646186 |                |                 |                 |
| 228331_at    | C11orf31              | 1.236574833   | 3.029425085 |                |                 |                 |
| 235486_at    | C11orf41              | -0.9285525    | 0           | C11orf41       | C11orf41        |                 |
| 1553787_at   | C11orf45              | -0.855273833  | 0           | C11orf45       |                 |                 |
| 221652_s_at  | C12orf11              | 0.56542       | 0.796301331 |                |                 |                 |
| 224759_s_at  | C12orf23              | 0.682026      | 1.810509752 | C12orf23       |                 |                 |
| 204521_at    | C12orf24              | 0.6092735     | 0.230227638 |                |                 |                 |
| 229018_at    | C12orf26              | 0.74395       | 0.550502435 |                |                 |                 |
| 227245_at    | C12orf30              | 0.560622      | 1.810509752 |                |                 |                 |
| 229778_at    | C12orf39              | 1.055458333   | 0.393887585 |                |                 |                 |
| 225772_s_at  | C12orf62              | -0.8025565    | 1.123589586 |                |                 |                 |
| 223476_s_at  | C12orf65              | 0.613259167   | 1.455154512 |                |                 |                 |
| 1553141_at   | C13orf31              | 0.920970333   | 0.393887585 | C13orf31       |                 |                 |
| 1553142_at   | C13orf31              | 1.221167833   | 0.137080273 | C13orf31       |                 |                 |
| 228937_at    | C13orf31              | 0.897141333   | 0.550502435 | C13orf31       |                 |                 |

| Probe Set ID | Gene Symbol | miR-128-miRNC | q value (%) | miR-128 tgts_M | miR-128 tgts_TS | miR-128 tgts_PT |
|--------------|-------------|---------------|-------------|----------------|-----------------|-----------------|
| 203504 s at  | ABCA1       | -1.2890325    | 0           | ABCA1          | ABCA1           | ABCA1           |
| 219757 s at  | C14orf101   | 0.502255167   | 2.499099453 |                |                 |                 |
| 226630 at    | C14orf106   | -0.519193667  | 2.499099453 |                |                 |                 |
| 241816 at    | C14orf106   | -0.6827525    | 1.455154512 |                |                 |                 |
| 219720 s at  | C14orf118   | 0.733957667   | 0.393887585 |                |                 |                 |
| 229520 s at  | C14orf118   | 0.6133365     | 3.701646186 |                |                 |                 |
| 219563 at    | C14orf139   | 1.3673325     | 0           |                |                 |                 |
| 223273 at    | C14orf142   | -0.552032     | 1.455154512 |                |                 |                 |
| 232635 at    | C14orf145   | -0.949005167  | 0.230227638 | C14orf145      |                 |                 |
| 225514 at    | C14orf21    | 0.573385167   | 3.029425085 |                |                 |                 |
| 223474 at    | C14orf4     | 0.861723167   | 3.701646186 | C14orf4        |                 |                 |
| 235430 at    | C14orf43    | 0.676577333   | 3.701646186 |                |                 |                 |
| 228666 at    | C15orf38    | -0.782378167  | 1.810509752 | C15orf38       |                 |                 |
| 1552310 at   | C15orf40    | -0.603085     | 0.393887585 |                |                 |                 |
| 232506 s at  | C15orf41    | 0.574771667   | 0.137080273 |                |                 |                 |
| 1560814 a at | C15orf57    | 0.735607      | 0           |                |                 |                 |
| 230281 at    | C16orf46    | 1.070141      | 0.230227638 | C16orf46       |                 |                 |
| 225088 at    | C16orf63    | 0.676668667   | 0.393887585 |                |                 |                 |
| 1568954 s at | C16orf72    | 0.575273167   | 1.123589586 |                |                 |                 |
| 228373 at    | C16orf72    | 0.873286333   | 0           |                |                 |                 |
| 213235 at    | C16orf88    | 0.641108833   | 3.029425085 |                |                 |                 |
| 229071 at    | C17orf100   | 0.562540833   | 3.701646186 |                |                 |                 |
| 220058 at    | C17orf39    | 0.862032333   | 0           |                |                 |                 |
| 223401 at    | C17orf48    | 0.5420905     | 3.029425085 | C17orf48       |                 |                 |
| 224574 at    | C17orf49    | 0.519571667   | 3.701646186 |                |                 |                 |
| 238166 s at  | C17orf51    | 1.198373      | 0           |                |                 |                 |
| 238167 at    | C17orf51    | 0.568287      | 0.393887585 |                |                 |                 |
| 218464 s at  | C17orf63    | 0.601171333   | 0.550502435 |                | C17orf63        |                 |
| 222641 s at  | C17orf63    | 0.759881667   | 0           |                | C17orf63        |                 |
| 219435 at    | C17orf68    | 0.824358      | 1.810509752 |                |                 |                 |
| 222779 s at  | C17orf85    | -0.583936167  | 0.230227638 | C17orf85       | C17orf85        | C17orf85        |
| 224957 at    | C18orf32    | 1.209317167   | 0.137080273 |                |                 |                 |
| 1553652 a at | C18orf54    | -0.602908667  | 0.550502435 |                |                 |                 |
| 229442 at    | C18orf54    | -0.709159167  | 1.810509752 |                |                 |                 |
| 244324 at    | C18orf54    | -0.857066167  | 0.796301331 |                |                 |                 |
| 221764 at    | C19orf22    | 0.773414167   | 2.499099453 |                |                 |                 |
| 223631 s at  | C19orf33    | -0.643989333  | 3.701646186 |                |                 |                 |
| 221988 at    | C19orf42    | 1.399458667   | 0           |                |                 |                 |
| 1552862 at   | C1orf104    | 0.8347065     | 0           |                |                 |                 |
| 230256 at    | C1orf104    | 0.874281667   | 0.796301331 |                |                 |                 |
| 204699 s at  | C1orf107    | 0.648977833   | 1.123589586 | C1orf107       |                 |                 |
| 204700 x at  | C1orf107    | 1.031022667   | 0.550502435 | C1orf107       |                 |                 |
| 1555112 a at | C1orf114    | 1.3301925     | 0.550502435 |                |                 |                 |
| 223124 s at  | C1orf128    | -0.534750167  | 3.029425085 | C1orf128       | C1orf128        |                 |
| 212002 at    | C1orf144    | -1.119380667  | 0.550502435 | C1orf144       | C1orf144        | C1orf144        |
| 212003 at    | C1orf144    | -1.2811905    | 0.137080273 | C1orf144       | C1orf144        | C1orf144        |
| 212004 at    | C1orf144    | -0.997545     | 0           | C1orf144       | C1orf144        | C1orf144        |
| 212005 at    | C1orf144    | -1.264864667  | 0.05396551  | C1orf144       | C1orf144        | C1orf144        |
| 233750 s at  | C1orf25     | 0.883453667   | 0.137080273 |                |                 |                 |
| 221222 s at  | C1orf56     | 1.109096      | 0           |                |                 |                 |
| 209006 s at  | C1orf63     | 0.622700167   | 1.123589586 |                |                 |                 |



| Probe Set ID | Gene Symbol | miR-128-miRNC | q value (%) | miR-128 tgts_M | miR-128 tgts_TS | miR-128 tgts_PT |
|--------------|-------------|---------------|-------------|----------------|-----------------|-----------------|
| 203504_s_at  | ABCA1       | -1.2890325    | 0           | ABCA1          | ABCA1           | ABCA1           |
| 1554660_a_at | C1orf71     | 0.677947      | 1.810509752 |                |                 |                 |
| 1554661_s_at | C1orf71     | 0.704310667   | 0.230227638 |                |                 |                 |
| 225551_at    | C1orf71     | 0.532476333   | 0.796301331 |                |                 |                 |
| 218448_at    | C2orf11     | 0.526951667   | 3.029425085 |                |                 |                 |
| 1554818_s_at | C2orf12     | 0.945855833   | 0.393887585 |                |                 |                 |
| 223951_at    | C2orf116    | 0.747951333   | 0.796301331 |                |                 |                 |
| 1552604_at   | C2orf74     | -0.7464275    | 3.029425085 |                |                 |                 |
| 1552605_s_at | C2orf74     | -0.623754167  | 1.455154512 |                |                 |                 |
| 220941_s_at  | C2orf91     | 1.208649333   | 0           |                |                 |                 |
| 226109_at    | C2orf91     | 1.383326333   | 0           |                |                 |                 |
| 224695_at    | C2orf29     | -0.573965     | 1.123589586 |                |                 |                 |
| 219128_at    | C2orf42     | 1.1022195     | 0           |                |                 |                 |
| 231252_at    | C2orf67     | -0.865234833  | 3.701646186 |                |                 |                 |
| 238768_at    | C2orf68     | 0.833830833   | 0           |                |                 |                 |
| 1558094_s_at | C3orf19     | 0.838474667   | 0           |                |                 |                 |
| 226891_at    | C3orf21     | -0.602704     | 0.230227638 |                |                 |                 |
| 1553158_at   | C3orf34     | 0.600208667   | 2.499099453 |                |                 |                 |
| 219474_at    | C3orf52     | 1.236992833   | 0.230227638 |                |                 |                 |
| 241817_at    | C3orf62     | 0.819931      | 0.796301331 |                |                 |                 |
| 1562953_s_at | C4orf12     | 0.6713295     | 2.499099453 |                |                 |                 |
| 231010_at    | C4orf16     | 1.007322333   | 0           |                |                 |                 |
| 242753_x_at  | C4orf16     | 0.998847333   | 0           |                |                 |                 |
| 219450_at    | C4orf19     | 0.559093167   | 1.810509752 |                |                 |                 |
| 228859_at    | C4orf21     | -0.596592167  | 2.499099453 |                |                 |                 |
| 231204_at    | C4orf21     | -0.5022575    | 3.029425085 |                |                 |                 |
| 219747_at    | C4orf31     | 2.971016      | 0           |                |                 |                 |
| 238015_at    | C4orf46     | -0.973276     | 0           |                |                 |                 |
| 238411_x_at  | C5orf13     | 1.474635      | 0           | C5orf13        | C5orf13         | C5orf13         |
| 1553108_at   | C5orf24     | 0.893259333   | 1.123589586 |                |                 |                 |
| 229886_at    | C5orf34     | -0.675788833  | 3.701646186 |                |                 |                 |
| 1554229_at   | C5orf41     | 0.699487833   | 0           |                | C5orf41         | C5orf41         |
| 225956_at    | C5orf41     | 0.541032667   | 3.701646186 |                | C5orf41         | C5orf41         |
| 225957_at    | C5orf41     | 1.0642765     | 0.550502435 |                | C5orf41         | C5orf41         |
| 238476_at    | C5orf41     | 1.0436475     | 2.499099453 |                | C5orf41         | C5orf41         |
| 226977_at    | C5orf53     | 0.889788167   | 0           |                |                 |                 |
| 241874_at    | C5orf53     | 0.535202833   | 0.796301331 |                |                 |                 |
| 229070_at    | C6orf105    | 0.520293333   | 1.455154512 |                |                 |                 |
| 205457_at    | C6orf106    | 0.641718333   | 1.810509752 |                |                 |                 |
| 217924_at    | C6orf106    | 1.241839833   | 0           |                |                 |                 |
| 217925_s_at  | C6orf106    | 1.006578      | 0           |                |                 |                 |
| 1554486_a_at | C6orf114    | -1.103231667  | 2.499099453 |                |                 |                 |
| 1559051_s_at | C6orf150    | 0.797299667   | 0.550502435 |                |                 |                 |
| 220324_at    | C6orf155    | -1.008844167  | 2.499099453 |                |                 |                 |
| 1553726_s_at | C6orf170    | 1.414555833   | 3.701646186 |                |                 |                 |
| 223576_at    | C6orf203    | 0.76587       | 0.137080273 |                |                 |                 |
| 229762_at    | C7orf38     | 1.205118333   | 0           |                |                 |                 |
| 218008_at    | C7orf42     | -0.926695833  | 0           | C7orf42        | C7orf42         |                 |
| 224688_at    | C7orf42     | -0.703197333  | 0.137080273 | C7orf42        | C7orf42         |                 |
| 206497_at    | C7orf44     | 0.5493235     | 3.029425085 |                |                 |                 |
| 209446_s_at  | C7orf44     | 0.778491667   | 0           |                |                 |                 |

| Probe Set ID | Gene Symbol      | miR-128-miRNC | q value (%) | miR-128 tgts_M | miR-128 tgts_TS | miR-128 tgts_PT |
|--------------|------------------|---------------|-------------|----------------|-----------------|-----------------|
| 203504_s_at  | ABCA1            | -1.2890325    | 0           | ABCA1          | ABCA1           | ABCA1           |
| 228728_at    | C7orf58          | -0.621921167  | 1.810509752 | C7orf58        |                 |                 |
| 244569_at    | C8orf37          | 0.738647667   | 3.701646186 |                |                 |                 |
| 1556571_at   | C8orf38          | -0.704999167  | 2.499099453 | C8orf38        |                 |                 |
| 220038_at    | C8orf44 /// SGK3 | 0.957291167   | 1.123589586 |                |                 |                 |
| 224158_s_at  | C8orf83          | 0.662110667   | 3.029425085 |                |                 |                 |
| 223007_s_at  | C9orf5           | 0.648513333   | 1.123589586 | C9orf5         |                 |                 |
| 227831_at    | C9orf5           | 0.570615      | 3.029425085 | C9orf5         |                 |                 |
| 218998_at    | C9orf6           | -0.565850833  | 1.810509752 | C9orf6         |                 |                 |
| 1554708_s_at | C9orf68          | 0.965647333   | 0.05396551  |                |                 |                 |
| 221865_at    | C9orf91          | 1.075579333   | 0           |                |                 |                 |
| 219147_s_at  | C9orf95          | 1.043053667   | 0           |                |                 |                 |
| 231270_at    | CA13             | 1.047719333   | 0.796301331 |                |                 |                 |
| 235899_at    | CA13             | 0.757779333   | 3.029425085 |                |                 |                 |
| 239106_at    | CA5BP            | 0.933861333   | 0.393887585 |                |                 |                 |
| 243173_at    | CABP7            | -0.579264333  | 3.701646186 |                |                 |                 |
| 207050_at    | CACNA2D1         | 0.778586167   | 0.137080273 |                |                 |                 |
| 34726_at     | CACNB3           | 0.703218      | 1.455154512 |                |                 |                 |
| 207693_at    | CACNB4           | 0.913894833   | 0.230227638 |                |                 |                 |
| 209002_s_at  | CALCOCO1         | 0.517841      | 1.455154512 |                |                 |                 |
| 206331_at    | CALCRL           | 2.013195      | 0           |                |                 |                 |
| 210815_s_at  | CALCRL           | 2.137966833   | 0           |                |                 |                 |
| 201615_x_at  | CALD1            | 0.59426       | 0.550502435 | CALD1          |                 |                 |
| 211984_at    | CALM1            | 0.533213333   | 1.810509752 |                |                 |                 |
| 211985_s_at  | CALM1            | 0.683415      | 0.393887585 |                |                 |                 |
| 213688_at    | CALM1            | 0.746340333   | 0.550502435 |                |                 |                 |
| 200623_s_at  | CALM3            | -0.905597667  | 0.230227638 |                |                 |                 |
| 224994_at    | CAMK2D           | -0.583965667  | 0.05396551  | CAMK2D         |                 |                 |
| 210787_s_at  | CAMKK2           | 0.512802667   | 1.455154512 | CAMKK2         |                 |                 |
| 212763_at    | CAMSAP1L1        | 0.617231667   | 0.230227638 |                |                 |                 |
| 217196_s_at  | CAMSAP1L1        | 0.819017333   | 0.796301331 |                |                 |                 |
| 208838_at    | CAND1            | -0.686739     | 1.123589586 | CAND1          |                 |                 |
| 208839_s_at  | CAND1            | -0.807773667  | 0.393887585 | CAND1          |                 |                 |
| 238034_at    | CANX             | 0.628186167   | 2.499099453 | CANX           |                 |                 |
| 212551_at    | CAP2             | 0.73764       | 0.230227638 | CAP2           |                 |                 |
| 1555608_at   | CAPRIN2          | 0.775828667   | 0.137080273 |                |                 |                 |
| 218456_at    | CAPRIN2          | 0.748045      | 0.230227638 |                |                 |                 |
| 208374_s_at  | CAPZA1           | -0.918563333  | 0.05396551  | CAPZA1         |                 | CAPZA1          |
| 1552701_a_at | CARD16           | 1.142377167   | 0.05396551  |                |                 |                 |
| 1552703_s_at | CARD16 /// CASP1 | 1.065073333   | 0           |                |                 |                 |
| 1554479_a_at | CARD8            | 0.781267667   | 1.455154512 |                |                 |                 |
| 204950_at    | CARD8            | 0.8491945     | 0           |                |                 |                 |
| 240983_s_at  | CARS             | 0.636835333   | 1.810509752 |                |                 |                 |
| 207842_s_at  | CASC3            | -0.696716167  | 0.796301331 | CASC3          | CASC3           | CASC3           |
| 211208_s_at  | CASK             | -0.549386667  | 1.810509752 |                |                 |                 |
| 1552689_at   | CASKIN1          | -0.819886     | 0.550502435 |                |                 |                 |
| 206011_at    | CASP1            | 0.951063167   | 0.550502435 | CASP1          |                 |                 |

| Probe Set ID | Gene Symbol | miR-128-miRNC | q value (%) | miR-128 tgts_M | miR-128 tgts_TS | miR-128 tgts_PT |
|--------------|-------------|---------------|-------------|----------------|-----------------|-----------------|
| 203504 s at  | ABCA1       | -1.2890325    | 0           | ABCA1          | ABCA1           | ABCA1           |
| 209970 x at  | CASP1       | 0.789382333   | 0.05396551  | CASP1          |                 |                 |
| 211366 x at  | CASP1       | 0.7275155     | 0           | CASP1          |                 |                 |
| 211367 s at  | CASP1       | 0.798197333   | 0.137080273 | CASP1          |                 |                 |
| 211368 s at  | CASP1       | 0.885092333   | 0           | CASP1          |                 |                 |
| 213596 at    | CASP4       | 0.646818      | 0.393887585 |                |                 |                 |
| 207181 s at  | CASP7       | 0.81774       | 0.550502435 |                |                 |                 |
| 203065 s at  | CAV1        | -0.94296      | 0           | CAV1           |                 |                 |
| 212097 at    | CAV1        | -1.287760333  | 0           | CAV1           |                 |                 |
| 202370 s at  | CBFB        | -0.690856667  | 1.123589586 | CBFB           |                 | CBFB            |
| 209682 at    | CBLB        | 0.526430333   | 3.029425085 |                |                 |                 |
| 209715 at    | CBX5        | -0.504221667  | 1.455154512 |                |                 |                 |
| 212126 at    | CBX5        | -0.609386833  | 0.796301331 |                |                 |                 |
| 48117 at     | CCDC101     | 0.652898833   | 3.701646186 |                |                 |                 |
| 225320 at    | CCDC109A    | 0.676608      | 2.499099453 | CCDC109A       |                 |                 |
| 225644 at    | CCDC117     | 0.5578445     | 2.499099453 |                |                 |                 |
| 235330 at    | CCDC117     | 0.53485       | 1.123589586 |                |                 |                 |
| 1553542 at   | CCDC125     | 0.627834333   | 0.796301331 | CCDC125        |                 |                 |
| 229082 at    | CCDC125     | 0.853334      | 0.550502435 | CCDC125        |                 |                 |
| 1554217 a at | CCDC132     | 0.593985      | 1.455154512 |                |                 |                 |
| 1561054 a at | CCDC14      | 0.602107333   | 1.810509752 |                |                 |                 |
| 226723 at    | CCDC23      | 0.6289405     | 1.123589586 |                |                 |                 |
| 218655 s at  | CCDC49      | 0.560745      | 0.230227638 |                |                 |                 |
| 226713 at    | CCDC50      | -1.389393833  | 0           |                |                 |                 |
| 228693 at    | CCDC50      | -1.229145     | 0           |                |                 |                 |
| 235051 at    | CCDC50      | -0.969500667  | 0           |                |                 |                 |
| 236831 at    | CCDC50      | -0.647403167  | 3.701646186 |                |                 |                 |
| 218026 at    | CCDC56      | -0.561048333  | 2.499099453 |                |                 |                 |
| 1553102 a at | CCDC69      | 1.311803      | 0           |                |                 |                 |
| 212886 at    | CCDC69      | 1.512974333   | 0           |                |                 |                 |
| 1553214 a at | CCDC7       | 1.025811167   | 0.230227638 | CCDC7          |                 |                 |
| 221791 s at  | CCDC72      | -0.502466667  | 1.123589586 | CCDC72         |                 |                 |
| 1559893 at   | CCDC75      | 0.530986167   | 1.810509752 |                |                 |                 |
| 228495 at    | CCDC75      | 0.519269333   | 2.499099453 |                |                 |                 |
| 232489 at    | CCDC76      | 0.545562      | 3.029425085 |                |                 |                 |
| 204609 at    | CCDC85B     | -1.131246167  | 0.796301331 |                |                 |                 |
| 222809 x at  | CCDC85C     | -0.563827333  | 3.029425085 |                |                 |                 |
| 238759 at    | CCDC88A     | 0.828843833   | 3.029425085 | CCDC88A        | CCDC88A         | CCDC88A         |
| 215343 at    | CCDC88C     | 1.09639       | 0.796301331 | CCDC88C        | CCDC88C         |                 |
| 209689 at    | CCDC93      | 0.888924333   | 0.550502435 |                |                 |                 |
| 221685 s at  | CCDC99      | -0.614070333  | 2.499099453 |                |                 |                 |
| 205899 at    | CCNA1       | 1.912486833   | 0           |                |                 |                 |
| 213226 at    | CCNA2       | -0.578099167  | 0.393887585 |                |                 |                 |
| 200952 s at  | CCND2       | 0.715329      | 0.137080273 |                |                 |                 |
| 200953 s at  | CCND2       | 0.812153167   | 1.123589586 |                |                 |                 |
| 223084 s at  | CCNDBP1     | 0.821         | 0           |                |                 |                 |
| 204826 at    | CCNF        | -0.712188833  | 3.029425085 | CCNF           |                 |                 |
| 227299 at    | CCNI        | 0.559256667   | 1.810509752 |                |                 |                 |
| 206967 at    | CCNT1       | 0.656729333   | 0.796301331 |                |                 |                 |
| 220671 at    | CCRN4L      | 0.7249915     | 0.393887585 |                |                 |                 |
| 226545 at    | CD109       | -0.933740833  | 0           |                |                 |                 |

| Probe Set ID | Gene Symbol          | miR-128-miRNC | q value (%) | miR-128 tgts_M | miR-128 tgts_TS | miR-128 tgts_PT |
|--------------|----------------------|---------------|-------------|----------------|-----------------|-----------------|
| 203504 s at  | ABCA1                | -1.2890325    | 0           | ABCA1          | ABCA1           | ABCA1           |
| 229900 at    | CD109                | -0.724272     | 0.796301331 |                |                 |                 |
| 239719 at    | CD109                | -0.633131667  | 1.810509752 |                |                 |                 |
| 223834 at    | CD274                | 1.149527333   | 0.05396551  | CD274          |                 |                 |
| 205264 at    | CD3EAP               | 1.272541667   | 0           |                |                 |                 |
| 215346 at    | CD40                 | 0.643827333   | 1.810509752 | CD40           |                 |                 |
| 222292 at    | CD40                 | 1.172888167   | 0           | CD40           |                 |                 |
| 205173 x at  | CD58                 | 0.549958333   | 0.796301331 |                |                 |                 |
| 211744 s at  | CD58                 | 0.6218485     | 0.230227638 |                |                 |                 |
| 216322 at    | CD58                 | 0.527794333   | 3.029425085 |                |                 |                 |
| 216942 s at  | CD58                 | 0.524745167   | 3.029425085 |                |                 |                 |
| 204440 at    | CD83                 | 1.138902667   | 3.701646186 |                |                 |                 |
| 233825 s at  | CD99L2               | -0.684472333  | 0           |                |                 |                 |
| 210440 s at  | CDC14A               | 1.028181333   | 0           |                |                 |                 |
| 210743 s at  | CDC14A               | 1.399892833   | 0           |                |                 |                 |
| 203213 at    | CDC2                 | -0.8156515    | 0.550502435 |                |                 |                 |
| 203214 x at  | CDC2                 | -0.697675333  | 1.123589586 |                |                 |                 |
| 210559 s at  | CDC2                 | -0.7739345    | 0.230227638 |                |                 |                 |
| 201853 s at  | CDC25B               | -0.987032833  | 0           |                |                 |                 |
| 205167 s at  | CDC25C               | -0.916745667  | 0.393887585 |                |                 |                 |
| 216914 at    | CDC25C               | -0.9046735    | 0.230227638 |                |                 |                 |
| 217010 s at  | CDC25C               | -0.828959     | 1.810509752 |                |                 |                 |
| 212897 at    | CDC2L6               | 0.567536      | 0.393887585 |                |                 |                 |
| 219343 at    | CDC37L1              | 0.8256225     | 0.230227638 |                |                 |                 |
| 228561 at    | CDC37L1              | 0.8667225     | 0           |                |                 |                 |
| 209286 at    | CDC42EP3             | -0.570335     | 1.123589586 |                |                 |                 |
| 209287 s at  | CDC42EP3             | -0.72657      | 0.05396551  |                |                 |                 |
| 209288 s at  | CDC42EP3             | -0.543801667  | 3.701646186 |                |                 |                 |
| 1552612 at   | CDC42SE2             | 0.734813333   | 0.393887585 |                |                 |                 |
| 1552613 s at | CDC42SE2             | 0.684968      | 1.455154512 |                |                 |                 |
| 221436 s at  | CDCA3                | -0.531626833  | 3.701646186 |                |                 |                 |
| 224753 at    | CDCA5                | -0.7588185    | 3.029425085 |                |                 |                 |
| 221520 s at  | CDCA8                | -1.217812833  | 0.393887585 |                |                 |                 |
| 213348 at    | CDKN1C               | -1.656151167  | 0.230227638 | CDKN1C         |                 |                 |
| 218929 at    | CDKN2AIP             | 0.532022833   | 3.701646186 |                |                 |                 |
| 207276 at    | CDR1                 | 1.220619833   | 1.810509752 |                |                 |                 |
| 228482_at    | CDRT4 ///<br>FAM18B2 | 0.708701833   | 3.029425085 |                |                 |                 |
| 213003 s at  | CEBPD                | -1.084828167  | 0.393887585 |                |                 |                 |
| 204962 s at  | CENPA                | -0.728420833  | 0           |                |                 |                 |
| 210821 x at  | CENPA                | -0.7493255    | 1.810509752 |                |                 |                 |
| 204739 at    | CENPC1               | -0.6884365    | 1.810509752 |                |                 |                 |
| 205046 at    | CENPE                | -0.695516167  | 0           |                |                 |                 |
| 207828 s at  | CENPF                | -0.51944      | 2.499099453 |                |                 |                 |
| 209172 s at  | CENPF                | -0.871221833  | 0           |                |                 |                 |
| 207590 s at  | CENPI                | -0.676614833  | 0.393887585 |                |                 |                 |
| 214804 at    | CENPI                | -0.857710833  | 0.550502435 |                |                 |                 |
| 242916 at    | CEP110               | 0.780606667   | 1.455154512 |                |                 |                 |
| 239413 at    | CEP152               | -0.875257     | 0.05396551  |                |                 |                 |
| 1558953 s at | CEP164               | 0.64779       | 0.393887585 |                |                 |                 |
| 218542 at    | CEP55                | -0.767978333  | 0.796301331 | CEP55          |                 |                 |

| Probe Set ID | Gene Symbol          | miR-128-miRNC | q value (%) | miR-128 tgts_M | miR-128 tgts_TS | miR-128 tgts_PT |
|--------------|----------------------|---------------|-------------|----------------|-----------------|-----------------|
| 203504_s at  | ABCA1                | -1.2890325    | 0           | ABCA1          | ABCA1           | ABCA1           |
| 200021 at    | CFL1                 | -0.766976667  | 1.810509752 |                |                 |                 |
| 224352_s at  | CFL2                 | -0.605789167  | 1.123589586 |                |                 |                 |
| 215105 at    | CG030                | -0.500110667  | 1.810509752 |                |                 |                 |
| 203975_s at  | CHAF1A               | -0.848992167  | 1.123589586 |                |                 |                 |
| 229808 at    | CHAF1A               | -0.658164     | 2.499099453 |                |                 |                 |
| 218642_s at  | CHCHD7               | -0.712799667  | 0           |                |                 |                 |
| 220619 at    | CHD7                 | -0.764704     | 1.455154512 |                |                 |                 |
| 1559481 at   | CHIC1                | 0.828066833   | 3.701646186 |                |                 |                 |
| 210069_at    | CHKB-CPT1B /// CPT1B | 1.214557      | 0           |                |                 |                 |
| 218178_s at  | CHMP1B               | -0.521118333  | 1.455154512 |                |                 |                 |
| 218571_s at  | CHMP4A               | 0.535305      | 3.701646186 |                |                 |                 |
| 226803 at    | CHMP4C               | 1.292847167   | 0           |                |                 |                 |
| 215916 at    | CHRNE                | 0.5258635     | 3.701646186 |                |                 |                 |
| 226368 at    | CHST11               | 0.64679       | 1.455154512 | CHST11         |                 |                 |
| 226314 at    | CHST14               | 0.833012167   | 1.455154512 |                |                 |                 |
| 208252_s at  | CHST3                | 0.522639667   | 3.029425085 |                |                 |                 |
| 200810_s at  | CIRBP                | -1.456406333  | 0.230227638 | CIRBP          |                 |                 |
| 200811 at    | CIRBP                | -1.447496833  | 0.137080273 | CIRBP          |                 |                 |
| 212801 at    | CIT                  | -0.835518667  | 1.123589586 |                |                 | CIT             |
| 207980_s at  | CITED2               | -1.2153855    | 0           | CITED2         | CITED2          | CITED2          |
| 209357 at    | CITED2               | -0.826916167  | 0.05396551  | CITED2         | CITED2          | CITED2          |
| 213976 at    | CIZ1                 | 0.734210167   | 3.701646186 |                |                 |                 |
| 1554264 at   | CKAP2                | -0.862949     | 0.393887585 |                |                 |                 |
| 218252 at    | CKAP2                | -0.657015667  | 1.810509752 |                |                 |                 |
| 201897_s at  | CKS1B                | -0.700498333  | 3.029425085 |                |                 |                 |
| 204170_s at  | CKS2                 | -0.689175     | 0.796301331 |                |                 |                 |
| 1555543_a at | CLCC1                | 0.633232      | 1.455154512 |                |                 |                 |
| 207855_s at  | CLCC1                | 0.539232833   | 1.810509752 |                |                 |                 |
| 201733 at    | CLCN3                | 0.827458667   | 0.796301331 | CLCN3          |                 | CLCN3           |
| 201734 at    | CLCN3                | 0.598912333   | 1.455154512 | CLCN3          |                 | CLCN3           |
| 201735_s at  | CLCN3                | 0.599272      | 2.499099453 | CLCN3          |                 | CLCN3           |
| 223249 at    | CLDN12               | 1.262943667   | 0           |                |                 |                 |
| 220332 at    | CLDN16               | 0.762344667   | 1.123589586 |                |                 |                 |
| 209732 at    | CLEC2B               | 1.09108       | 0           |                |                 |                 |
| 219944 at    | CLIP4                | 0.665638333   | 0.137080273 | CLIP4          |                 |                 |
| 204084_s at  | CLN5                 | 0.621242833   | 0.393887585 |                |                 |                 |
| 214252_s at  | CLN5                 | 0.875791333   | 0           |                |                 |                 |
| 222539 at    | CLN6                 | -0.677670667  | 3.701646186 |                |                 |                 |
| 204980 at    | CLOCK                | 1.004254833   | 0.137080273 |                |                 |                 |
| 1566151 at   | CLP1                 | -1.869829833  | 0           | CLP1           |                 |                 |
| 204370 at    | CLP1                 | -0.703512167  | 0           | CLP1           |                 |                 |
| 202799 at    | CLPP                 | -0.741013     | 3.029425085 | CLPP           | CLPP            |                 |
| 204809 at    | CLPX                 | 0.523236667   | 1.123589586 |                |                 |                 |
| 223507 at    | CLPX                 | 0.683203      | 1.810509752 |                |                 |                 |
| 224733 at    | CMTM3                | -0.819308333  | 0           |                |                 |                 |
| 217752_s at  | CNDP2                | 0.514230333   | 2.499099453 |                |                 |                 |
| 200860_s at  | CNOT1                | -0.505276667  | 1.123589586 |                |                 |                 |
| 210203 at    | CNOT4                | 0.643418167   | 0.550502435 | CNOT4          |                 |                 |

| Probe Set ID | Gene Symbol                         | miR-128-miRNC | q value (%) | miR-128 tgts_M | miR-128 tgts_TS | miR-128 tgts_PT |
|--------------|-------------------------------------|---------------|-------------|----------------|-----------------|-----------------|
| 203504 s at  | ABCA1                               | -1.2890325    | 0           | ABCA1          | ABCA1           | ABCA1           |
| 210866 s at  | CNOT4                               | 0.638982      | 1.123589586 | CNOT4          |                 |                 |
| 217970 s at  | CNOT6                               | -0.748280833  | 0           | CNOT6          | CNOT6           | CNOT6           |
| 222476 at    | CNOT6                               | -0.797902667  | 1.123589586 | CNOT6          | CNOT6           | CNOT6           |
| 208597_at    | CNTF ///<br>ZFP91 ///<br>ZFP91-CNTF | -0.753585333  | 3.029425085 |                |                 |                 |
| 239989 at    | CNTLN                               | -0.874934333  | 1.455154512 | CNTLN          |                 |                 |
| 203641 s at  | COBLL1                              | 0.665418833   | 1.123589586 | COBLL1         |                 |                 |
| 215393 s at  | COBLL1                              | 0.612853333   | 3.029425085 | COBLL1         |                 |                 |
| 225769 at    | COG6                                | 0.513846667   | 2.499099453 |                |                 |                 |
| 231766 s at  | COL12A1                             | -0.707477167  | 1.810509752 |                |                 |                 |
| 211343 s at  | COL13A1                             | 0.782471667   | 0.796301331 |                |                 |                 |
| 1556499 s at | COL1A1                              | 1.265750667   | 0           |                |                 |                 |
| 202310 s at  | COL1A1                              | 0.9854575     | 0           |                |                 |                 |
| 225293 at    | COL27A1                             | 0.856627833   | 0.550502435 |                |                 |                 |
| 221019 s at  | COLEC12                             | -2.1475835    | 0           |                |                 |                 |
| 218439 s at  | COMMMD10                            | 0.696526667   | 0.230227638 |                |                 |                 |
| 222637 at    | COMMMD10                            | 0.986193167   | 0.393887585 |                |                 |                 |
| 214337 at    | COPA                                | 1.049311333   | 0.137080273 |                |                 |                 |
| 219397 at    | COQ10B                              | 0.7087455     | 0.796301331 |                |                 |                 |
| 221676 s at  | CORO1C                              | -0.556356667  | 0.796301331 | CORO1C         | CORO1C          | CORO1C          |
| 214277 at    | COX11                               | 0.758090667   | 3.029425085 |                |                 |                 |
| 203880 at    | COX17                               | 0.607345      | 0.550502435 |                |                 |                 |
| 235533 at    | COX19                               | 1.061341667   | 0.393887585 |                |                 |                 |
| 218057 x at  | COX4NB                              | -0.563154333  | 1.455154512 |                |                 |                 |
| 222504 s at  | COX4NB                              | -0.7147105    | 0.796301331 |                |                 |                 |
| 227323 at    | COX4NB                              | -0.8814145    | 1.455154512 |                |                 |                 |
| 227363 s at  | COX4NB                              | -0.515366333  | 1.123589586 |                |                 |                 |
| 202110 at    | COX7B                               | -0.623295     | 0.393887585 | COX7B          |                 |                 |
| 201119 s at  | COX8A                               | -0.940352167  | 0.137080273 | COX8A          |                 |                 |
| 204662 at    | CP110                               | -0.675386167  | 3.701646186 |                |                 |                 |
| 222903 s at  | CPEB1                               | 0.993935833   | 0           |                |                 |                 |
| 226939 at    | CPEB2                               | -0.520029333  | 1.810509752 |                |                 |                 |
| 224828 at    | CPEB4                               | 0.576125333   | 1.810509752 |                | CPEB4           | CPEB4           |
| 224829 at    | CPEB4                               | 0.964438167   | 0.393887585 |                | CPEB4           | CPEB4           |
| 217557 s at  | CPM                                 | -1.926951667  | 0           |                |                 |                 |
| 243727 at    | CPNE8                               | 0.95158       | 0.230227638 | CPNE8          |                 |                 |
| 204920 at    | CPS1                                | 0.632080333   | 3.701646186 |                |                 |                 |
| 217564 s at  | CPS1                                | 1.039897833   | 1.455154512 |                |                 |                 |
| 225565 at    | CREB1                               | 0.758965333   | 0.393887585 |                |                 | CREB1           |
| 225572 at    | CREB1                               | 0.698837667   | 3.701646186 |                |                 | CREB1           |
| 229228 at    | CREB5                               | 1.021611667   | 1.810509752 |                |                 |                 |
| 201988 s at  | CREBL2                              | 0.804431667   | 0           |                |                 |                 |
| 201989 s at  | CREBL2                              | 0.601861667   | 0.796301331 |                |                 |                 |
| 201990 s at  | CREBL2                              | 0.903065667   | 0           |                |                 |                 |
| 202978 s at  | CREBZF                              | 0.557802      | 2.499099453 |                |                 |                 |
| 201200 at    | CREG1                               | 0.742873333   | 0.796301331 |                |                 |                 |
| 203368 at    | CRELD1                              | 0.813908167   | 0.550502435 |                |                 |                 |
| 241741 at    | CRLS1                               | -0.685174     | 0.550502435 | CRLS1          |                 |                 |
| 202517 at    | CRMP1                               | -0.560566167  | 1.810509752 |                |                 |                 |

| Probe Set ID | Gene Symbol                       | miR-128-miRNC | q value (%) | miR-128 tgts_M | miR-128 tgts_TS | miR-128 tgts_PT |
|--------------|-----------------------------------|---------------|-------------|----------------|-----------------|-----------------|
| 203504_s_at  | ABCA1                             | -1.2890325    | 0           | ABCA1          | ABCA1           | ABCA1           |
| 201380_at    | CRTAP                             | -0.510595167  | 1.810509752 |                |                 |                 |
| 226656_at    | CRTAP                             | -0.514678333  | 3.029425085 |                |                 |                 |
| 227138_at    | CRTAP                             | -1.0478285    | 0           |                |                 |                 |
| 209674_at    | CRY1                              | 0.574908      | 3.701646186 |                |                 |                 |
| 212695_at    | CRY2                              | 1.161649333   | 3.029425085 |                |                 |                 |
| 206777_s_at  | CRYBB2 ///<br>CRYBB2P1            | 0.580601      | 1.455154512 |                |                 |                 |
| 239077_at    | CSGALNAC<br>T2                    | 0.701412333   | 1.123589586 |                |                 |                 |
| 222235_s_at  | CSGALNAC<br>T2 /// RP1-<br>19N1.1 | 0.743008333   | 3.701646186 |                |                 |                 |
| 208865_at    | CSNK1A1                           | 0.850478333   | 0.393887585 | CSNK1A1        |                 |                 |
| 208866_at    | CSNK1A1                           | 0.778447333   | 0.137080273 | CSNK1A1        |                 |                 |
| 208867_s_at  | CSNK1A1                           | 0.692675      | 0.230227638 | CSNK1A1        |                 |                 |
| 231920_s_at  | CSNK1G1                           | 0.636494167   | 1.455154512 |                |                 |                 |
| 212073_at    | CSNK2A1 ///<br>CSNK2A1P           | 0.602668333   | 3.701646186 |                |                 |                 |
| 221260_s_at  | CSRNP2                            | 0.9531435     | 0.796301331 |                |                 |                 |
| 225042_s_at  | CSRNP2                            | 0.5178905     | 1.810509752 |                |                 |                 |
| 202190_at    | CSTF1                             | -0.628886333  | 1.455154512 |                |                 |                 |
| 238821_at    | CSTF2                             | 0.519454167   | 3.029425085 |                |                 |                 |
| 203445_s_at  | CTDSP2                            | -0.699894667  | 0           | CTDSP2         | CTDSP2          | CTDSP2          |
| 201906_s_at  | CTDSPL                            | -0.820845     | 0           |                | CTDSPL          | CTDSPL          |
| 225681_at    | CTHRC1                            | 0.532535      | 1.810509752 |                |                 |                 |
| 223679_at    | CTNNB1                            | 0.859392333   | 1.455154512 |                |                 |                 |
| 219080_s_at  | CTPS2                             | -0.660626333  | 0.796301331 | CTPS2          |                 |                 |
| 202060_at    | CTR9                              | -0.7882465    | 0.550502435 |                |                 |                 |
| 201487_at    | CTSC                              | -0.533928333  | 0.393887585 |                |                 |                 |
| 225647_s_at  | CTSC                              | -0.6533015    | 1.455154512 |                |                 |                 |
| 202901_x_at  | CTSS                              | 1.715497167   | 0.796301331 |                |                 |                 |
| 202902_s_at  | CTSS                              | 1.227022833   | 0           |                |                 |                 |
| 214073_at    | CTTN                              | 1.0625095     | 0           |                |                 |                 |
| 241747_s_at  | CUL7                              | 0.942785      | 0.230227638 |                |                 |                 |
| 218970_s_at  | CUTC                              | -0.522719833  | 0.550502435 |                |                 |                 |
| 1569203_at   | CXCL2                             | 1.029807833   | 0           | CXCL2          | CXCL2           |                 |
| 219355_at    | CXorf57                           | 0.6428385     | 3.701646186 |                |                 |                 |
| 205073_at    | CYP2J2                            | 1.465791167   | 0           |                |                 |                 |
| 202314_at    | CYP51A1                           | 0.535478333   | 1.123589586 |                |                 |                 |
| 1555842_at   | CYTH2                             | 0.864977833   | 1.123589586 |                |                 |                 |
| 212480_at    | CYTSA                             | 0.824798833   | 0           |                |                 |                 |
| 226666_at    | DAAM1                             | -0.9139395    | 0           |                |                 |                 |
| 226020_s_at  | DAB1 ///<br>OMA1                  | 0.866582      | 0.393887585 |                |                 |                 |
| 228942_s_at  | DAB2IP                            | 1.044189167   | 0           |                |                 |                 |
| 219179_at    | DACT1                             | 0.688756833   | 0           | DACT1          |                 |                 |
| 202428_x_at  | DBI                               | -0.915615     | 0.05396551  | DBI            |                 |                 |
| 209389_x_at  | DBI                               | -0.854556667  | 0           | DBI            |                 |                 |
| 211070_x_at  | DBI                               | -1.006536667  | 0           | DBI            |                 |                 |
| 205369_x_at  | DBT                               | 0.977485167   | 0.550502435 |                |                 |                 |
| 244687_at    | DBT                               | 0.954439      | 0           |                |                 |                 |

| Probe Set ID | Gene Symbol    | miR-128-miRNC | q value (%) | miR-128 tgts_M | miR-128 tgts_TS | miR-128 tgts_PT |
|--------------|----------------|---------------|-------------|----------------|-----------------|-----------------|
| 203504 s at  | ABCA1          | -1.2890325    | 0           | ABCA1          | ABCA1           | ABCA1           |
| 219001 s at  | DCAF10         | 0.759336667   | 0.796301331 |                |                 |                 |
| 226938 at    | DCAF4          | 0.896120167   | 0.393887585 |                |                 |                 |
| 221744 at    | DCAF7          | -0.690145     | 0.393887585 | DCAF7          |                 | DCAF7           |
| 224730 at    | DCAF7          | -0.6085725    | 3.029425085 | DCAF7          |                 | DCAF7           |
| 224748 at    | DCAF7          | -0.56786      | 0.550502435 | DCAF7          |                 | DCAF7           |
| 222925 at    | DCDC2          | -1.001533833  | 0.05396551  | DCDC2          |                 |                 |
| 205399 at    | DCLK1          | 1.4085605     | 0.393887585 |                |                 |                 |
| 232505 at    | DCTN2          | 0.7957755     | 0.393887585 |                |                 |                 |
| 212855 at    | DCUN1D4        | -0.783080167  | 1.455154512 | DCUN1D4        | DCUN1D4         | DCUN1D4         |
| 1553565 s at | DDAH1          | -0.566136667  | 0.796301331 | DDAH1          | DDAH1           |                 |
| 209094 at    | DDAH1          | -0.63342      | 1.455154512 | DDAH1          | DDAH1           |                 |
| 229456 s at  | DDAH1          | -1.043041667  | 0           | DDAH1          | DDAH1           |                 |
| 243711 at    | DDAH1          | -1.001291167  | 0.05396551  | DDAH1          | DDAH1           |                 |
| 220694 at    | DDEF1IT1       | -1.47998      | 0.550502435 |                |                 |                 |
| 225965 at    | DDHD1          | 0.669032167   | 0.796301331 |                |                 |                 |
| 225970 at    | DDHD1          | 0.776318167   | 0           |                |                 |                 |
| 244154 at    | DDHD1          | 0.6768685     | 2.499099453 |                |                 |                 |
| 208151 x at  | DDX17          | 0.67629       | 0.230227638 | DDX17          |                 |                 |
| 208719 s at  | DDX17          | 0.649405      | 1.123589586 | DDX17          |                 |                 |
| 213998 s at  | DDX17          | 0.681205      | 1.810509752 | DDX17          |                 |                 |
| 201584 s at  | DDX39          | -0.765082333  | 2.499099453 |                |                 |                 |
| 218943 s at  | DDX58          | 0.720401      | 0.796301331 |                |                 |                 |
| 218986 s at  | DDX60          | 0.6380575     | 2.499099453 |                |                 |                 |
| 219763 at    | DENND1A        | -1.179005833  | 0.796301331 | DENND1A        |                 |                 |
| 226980 at    | DEPDC1B        | -0.848204667  | 0.796301331 |                |                 |                 |
| 1561114 a at | DEPDC4         | 1.167598667   | 1.810509752 |                |                 |                 |
| 203733 at    | DEXI           | 0.563202333   | 3.029425085 |                |                 |                 |
| 202534 x at  | DHFR           | -0.616917167  | 1.123589586 | DHFR           |                 |                 |
| 48808 at     | DHFR           | -0.7676895    | 0.05396551  | DHFR           |                 |                 |
| 202802 at    | DHPS           | 0.653674167   | 3.701646186 |                |                 |                 |
| 218756 s at  | DHRS11         | -0.523269333  | 1.455154512 |                |                 |                 |
| 202481 at    | DHRS3          | 0.689101667   | 3.029425085 |                |                 |                 |
| 227094 at    | DHTKD1         | -0.758441833  | 0           | DHTKD1         |                 |                 |
| 205603 s at  | DIAPH2         | 0.51177       | 1.455154512 |                |                 |                 |
| 205726 at    | DIAPH2         | 0.7391735     | 0           |                |                 |                 |
| 217246 s at  | DIAPH2         | 0.805049      | 0.230227638 |                |                 |                 |
| 212888 at    | DICER1         | 0.8405485     | 0.137080273 |                |                 |                 |
| 213229 at    | DICER1         | 0.703863667   | 3.701646186 |                |                 |                 |
| 1555301 a at | DIP2A          | 0.973043      | 0.550502435 | DIP2A          |                 |                 |
| 1561286 a at | DIP2A          | 0.959651833   | 0.137080273 | DIP2A          |                 |                 |
| 224872 at    | DIP2B          | 0.698047333   | 0.796301331 |                |                 |                 |
| 212504 at    | DIP2C          | 0.631051333   | 3.701646186 |                |                 |                 |
| 214717_at    | DKFZp434H1419  | -0.573467333  | 0.230227638 |                |                 |                 |
| 229715_at    | DKFZp686O24166 | 0.614608833   | 0.393887585 |                |                 |                 |
| 219908 at    | DKK2           | 1.3448525     | 1.455154512 | DKK2           | DKK2            | DKK2            |
| 202196 s at  | DKK3           | 0.698371667   | 0.796301331 |                |                 |                 |
| 216870 x at  | DLEU2          | -1.008364167  | 0.393887585 |                |                 |                 |
| 215629 s at  | DLEU2 ///      | -1.000967333  | 0           |                |                 |                 |



| Probe Set ID | Gene Symbol | miR-128-miRNC | q value (%) | miR-128 tgts_M | miR-128 tgts_TS | miR-128 tgts_PT |
|--------------|-------------|---------------|-------------|----------------|-----------------|-----------------|
| 203504 s at  | ABCA1       | -1.2890325    | 0           | ABCA1          | ABCA1           | ABCA1           |
|              | DLEU2L      |               |             |                |                 |                 |
| 230229 at    | DLG1        | -1.021478833  | 0           |                |                 |                 |
| 210684 s at  | DLG4        | 1.129636333   | 0.550502435 |                |                 |                 |
| 208086 s at  | DMD         | 0.577513833   | 1.123589586 | DMD            |                 |                 |
| 1554333 at   | DNAJA4      | 1.287140167   | 0           | DNAJA4         |                 |                 |
| 209015 s at  | DNAJB6      | 0.796515333   | 0.137080273 |                |                 |                 |
| 1554462 a at | DNAJB9      | 1.857629      | 0           |                |                 |                 |
| 202842 s at  | DNAJB9      | 1.750745333   | 0           |                |                 |                 |
| 202843 at    | DNAJB9      | 2.188857      | 0           |                |                 |                 |
| 222620 s at  | DNAJC1      | 0.948597      | 0           |                |                 |                 |
| 222621 at    | DNAJC1      | 0.815874167   | 0.796301331 |                |                 |                 |
| 221782 at    | DNAJC10     | 0.501178      | 3.029425085 |                |                 |                 |
| 212908 at    | DNAJC16     | 0.662416833   | 1.455154512 | DNAJC16        |                 |                 |
| 212911 at    | DNAJC16     | 0.629164667   | 2.499099453 | DNAJC16        |                 |                 |
| 213853 at    | DNAJC24     | 0.566112833   | 3.701646186 |                |                 |                 |
| 1556053 at   | DNAJC7      | 1.099284167   | 0.230227638 |                |                 |                 |
| 240144 at    | DNASE1      | 0.6966625     | 0.796301331 |                |                 |                 |
| 203912 s at  | DNASE1L1    | 0.713374667   | 1.455154512 | DNASE1L1       |                 |                 |
| 218457 s at  | DNMT3A      | 0.7893145     | 0.230227638 |                |                 |                 |
| 219279 at    | DOCK10      | 1.020011333   | 0           |                |                 |                 |
| 215237 at    | DOCK9       | 0.654685      | 0.796301331 | DOCK9          |                 |                 |
| 209691 s at  | DOK4        | 0.944619      | 0.05396551  |                |                 |                 |
| 40612 at     | DOPEY1      | 0.566782833   | 2.499099453 | DOPEY1         |                 |                 |
| 204514 at    | DPH2        | 0.594276833   | 2.499099453 |                |                 |                 |
| 1560916 a at | DPY19L1     | 0.712951667   | 0.230227638 |                |                 |                 |
| 212792 at    | DPY19L1     | 1.007990667   | 0           |                |                 |                 |
| 213391 at    | DPY19L4     | -0.60687      | 3.029425085 | DPY19L4        |                 |                 |
| 204751 x at  | DSC2        | -0.870040333  | 0.550502435 | DSC2           |                 |                 |
| 226817 at    | DSC2        | -0.815042667  | 0.393887585 | DSC2           |                 |                 |
| 219000 s at  | DSCC1       | 0.7342775     | 0.230227638 |                |                 |                 |
| 232825 s at  | DSEL        | -0.706623     | 0.796301331 |                |                 |                 |
| 204455 at    | DST         | -0.902813333  | 0           | DST            |                 |                 |
| 218585 s at  | DTL         | -0.7779795    | 0.137080273 |                |                 |                 |
| 222680 s at  | DTL         | -0.719125     | 0.796301331 |                |                 |                 |
| 208430 s at  | DTNA        | 1.2542555     | 0           | DTNA           |                 | DTNA            |
| 210736 x at  | DTNA        | 1.273778667   | 0           | DTNA           |                 | DTNA            |
| 211493 x at  | DTNA        | 1.431123667   | 0           | DTNA           |                 | DTNA            |
| 227084 at    | DTNA        | 0.991009833   | 0           | DTNA           |                 | DTNA            |
| 236649 at    | DTWD1       | 0.906457167   | 0           |                |                 |                 |
| 1553984 s at | DTYMK       | -0.951497     | 0.137080273 |                |                 |                 |
| 226440 at    | DUSP22      | 0.6542235     | 0.796301331 |                |                 |                 |
| 209457 at    | DUSP5       | -0.519385667  | 1.810509752 |                | DUSP5           | DUSP5           |
| 201908 at    | DVL3        | 1.082679333   | 0           |                |                 |                 |
| 223171 at    | DYM         | 0.960408167   | 0           |                |                 |                 |
| 211928 at    | DYNC1H1     | -0.520808333  | 3.701646186 |                |                 |                 |
| 219469 at    | DYNC2H1     | -0.5417395    | 0.796301331 | DYNC2H1        |                 |                 |
| 201999 s at  | DYNLT1      | -0.657522667  | 1.123589586 | DYNLT1         |                 |                 |
| 204557 s at  | DZIP1       | 0.630069333   | 2.499099453 | DZIP1          |                 |                 |
| 228033 at    | E2F7        | -0.946692     | 0.796301331 | E2F7           | E2F7            | E2F7            |
| 241725 at    | E2F7        | -0.51414      | 1.810509752 | E2F7           | E2F7            | E2F7            |

| Probe Set ID | Gene Symbol | miR-128-miRNC | q value (%) | miR-128 tgts_M | miR-128 tgts_TS | miR-128 tgts_PT |
|--------------|-------------|---------------|-------------|----------------|-----------------|-----------------|
| 203504 s at  | ABCA1       | -1.2890325    | 0           | ABCA1          | ABCA1           | ABCA1           |
| 219551 at    | EAF2        | 1.062586333   | 0.05396551  | EAF2           |                 |                 |
| 227374 at    | EARS2       | 0.516359167   | 3.701646186 | EARS2          |                 |                 |
| 201750 s at  | ECE1        | -1.116269167  | 0.550502435 | ECE1           | ECE1            |                 |
| 201135 at    | ECHS1       | -0.64408      | 3.029425085 |                |                 |                 |
| 227780 s at  | ECSCR       | -0.576438833  | 1.810509752 |                |                 |                 |
| 221399 at    | EDA2R       | 0.502463333   | 3.029425085 | EDA2R          |                 |                 |
| 220342 x at  | EDEM3       | 0.568167833   | 1.455154512 |                | EDEM3           | EDEM3           |
| 204840 s at  | EEA1        | 0.655246667   | 2.499099453 |                |                 |                 |
| 1553392 at   | EFCAB3      | 1.5158365     | 3.029425085 |                |                 |                 |
| 226800 at    | EFCAB7      | 0.690949667   | 0.137080273 |                |                 |                 |
| 202668 at    | EFNB2       | 1.05726       | 1.123589586 |                |                 |                 |
| 202669 s at  | EFNB2       | 0.856393      | 0           |                |                 |                 |
| 218973 at    | EFTUD1      | 0.761323      | 0           |                |                 |                 |
| 1565483 at   | EGFR        | -0.537320667  | 3.701646186 |                |                 | EGFR            |
| 201693 s at  | EGR1        | 4.9807615     | 0           |                |                 |                 |
| 201694 s at  | EGR1        | 5.650494333   | 0           |                |                 |                 |
| 227404 s at  | EGR1        | 5.54022       | 0           |                |                 |                 |
| 208669 s at  | EID1        | -0.64464      | 1.455154512 | EID1           |                 |                 |
| 211698 at    | EID1        | -0.7358825    | 1.810509752 | EID1           |                 |                 |
| 231292 at    | EID3        | -1.069109667  | 0.550502435 | EID3           |                 |                 |
| 219426 at    | EIF2C3      | 0.577047333   | 3.029425085 | EIF2C3         |                 |                 |
| 208725 at    | EIF2S2      | -1.246912167  | 0           | EIF2S2         | EIF2S2          |                 |
| 242550 at    | EIF3B       | 1.064920833   | 2.499099453 |                |                 |                 |
| 208770 s at  | EIF4EBP2    | 0.700755      | 0.550502435 |                |                 |                 |
| 224645 at    | EIF4EBP2    | 0.741945667   | 0.05396551  |                |                 |                 |
| 208707 at    | EIF5        | -0.651520333  | 0.05396551  |                | EIF5            |                 |
| 220198 s at  | EIF5A2      | 0.777270167   | 0.796301331 |                |                 |                 |
| 235296 at    | EIF5A2      | 0.595167333   | 3.701646186 |                |                 |                 |
| 203490 at    | ELF4        | 0.956906667   | 0.05396551  | ELF4           |                 |                 |
| 31845 at     | ELF4        | 0.9510475     | 0           | ELF4           |                 |                 |
| 220363 s at  | ELMO2       | 0.5114775     | 2.499099453 | ELMO2          |                 |                 |
| 218028 at    | ELOVL1      | -0.717112167  | 1.810509752 | ELOVL1         |                 |                 |
| 57163 at     | ELOVL1      | -0.756754333  | 0.393887585 | ELOVL1         |                 |                 |
| 227075 at    | ELP3        | 0.841878167   | 0.137080273 |                |                 |                 |
| 204398 s at  | EML2        | 0.670081833   | 1.810509752 |                |                 |                 |
| 201324 at    | EMP1        | -0.52266      | 2.499099453 |                |                 |                 |
| 201325 s at  | EMP1        | -0.587843333  | 1.810509752 |                |                 |                 |
| 213895 at    | EMP1        | -0.735138333  | 0.550502435 |                |                 |                 |
| 201341 at    | ENC1        | 0.531054167   | 1.810509752 |                |                 |                 |
| 201313 at    | ENO2        | 0.833903      | 0           | ENO2           |                 |                 |
| 228682 at    | ENOPH1      | 0.619921167   | 1.123589586 |                |                 |                 |
| 204160 s at  | ENPP4       | 1.238764      | 0           |                |                 |                 |
| 220153 at    | ENTPD7      | 0.632297167   | 0           |                |                 |                 |
| 226775 at    | ENY2        | -0.680133667  | 1.455154512 |                |                 |                 |
| 217050 at    | EPAG        | 0.70165       | 0.137080273 |                |                 |                 |
| 1554481 a at | EPB41       | 0.716         | 0.796301331 |                | EPB41           |                 |
| 214530 x at  | EPB41       | 0.7301445     | 1.455154512 |                | EPB41           |                 |
| 220161 s at  | EPB41L4B    | 0.952618167   | 1.455154512 |                |                 |                 |
| 223427 s at  | EPB41L4B    | 1.109225333   | 0           |                |                 |                 |
| 206114 at    | EPHA4       | 1.284071333   | 0           |                |                 |                 |

| Probe Set ID | Gene Symbol | miR-128-miRNC | q value (%) | miR-128 tgts_M | miR-128 tgts_TS | miR-128 tgts_PT |
|--------------|-------------|---------------|-------------|----------------|-----------------|-----------------|
| 203504 s at  | ABCA1       | -1.2890325    | 0           | ABCA1          | ABCA1           | ABCA1           |
| 227449 at    | EPHA4       | 1.390955833   | 1.810509752 |                |                 |                 |
| 228948 at    | EPHA4       | 1.837396833   | 0           |                |                 |                 |
| 229374 at    | EPHA4       | 1.160378833   | 0.137080273 |                |                 |                 |
| 210753 s at  | EPHB1       | -1.273425667  | 0           | EPHB1          |                 |                 |
| 211898 s at  | EPHB1       | -1.411022667  | 0           | EPHB1          |                 |                 |
| 230425 at    | EPHB1       | -1.2920955    | 0           | EPHB1          |                 |                 |
| 209589 s at  | EPHB2       | 0.676266167   | 1.810509752 | EPHB2          | EPHB2           | EPHB2           |
| 203463 s at  | EPN2        | 0.867781833   | 1.810509752 |                |                 |                 |
| 1555826 at   | EPR1        | -0.9612655    | 3.029425085 |                |                 |                 |
| 210385 s at  | ERAP1       | 0.609392      | 0.393887585 |                |                 |                 |
| 1554273 a at | ERAP2       | 0.798373333   | 0.796301331 |                |                 |                 |
| 219759 at    | ERAP2       | 0.611111333   | 1.123589586 |                |                 |                 |
| 217941 s at  | ERBB2IP     | -0.618632167  | 0.796301331 | ERBB2IP        |                 |                 |
| 222473 s at  | ERBB2IP     | -0.630966667  | 0.550502435 | ERBB2IP        |                 |                 |
| 215606 s at  | ERC1        | 0.844471      | 0.137080273 |                |                 |                 |
| 228131 at    | ERCC1       | -1.287743833  | 0           |                |                 |                 |
| 230108 at    | ERCC6       | 0.680196333   | 1.810509752 |                |                 |                 |
| 202441 at    | ERLIN1      | 0.530608      | 0.550502435 | ERLIN1         |                 |                 |
| 202444 s at  | ERLIN1      | 0.578411667   | 0.796301331 | ERLIN1         |                 |                 |
| 218342 s at  | ERMP1       | 0.568858333   | 1.123589586 |                |                 |                 |
| 222603 at    | ERMP1       | 0.650387333   | 1.810509752 |                |                 |                 |
| 207061 at    | ERN1        | 1.088482      | 3.029425085 |                |                 |                 |
| 220012 at    | ERO1LB      | 1.342514833   | 0           | ERO1LB         |                 |                 |
| 235588 at    | ESCO2       | -0.6973165    | 1.123589586 | ESCO2          |                 |                 |
| 208394 x at  | ESM1        | 0.839423333   | 2.499099453 |                |                 |                 |
| 219121 s at  | ESRP1       | 1.784737833   | 0           |                |                 |                 |
| 208858 s at  | ESYT1       | 0.644788333   | 1.123589586 |                |                 |                 |
| 1555829 at   | ESYT2       | 1.672979167   | 0           |                |                 |                 |
| 201574 at    | ETF1        | 0.904732667   | 0           |                |                 |                 |
| 224454 at    | ETNK1       | -0.806979167  | 0.550502435 |                |                 |                 |
| 219432 at    | EVC         | -0.580122667  | 0.796301331 | EVC            |                 |                 |
| 204774 at    | EVI2A       | -0.606490833  | 1.123589586 |                |                 |                 |
| 218363 at    | EXD2        | 0.591619833   | 1.455154512 |                |                 |                 |
| 224253 at    | EXOC5       | 0.830283      | 1.810509752 |                |                 |                 |
| 233924 s at  | EXOC6       | 0.933500167   | 0           |                |                 |                 |
| 1559044 at   | EXOSC1      | 0.798506      | 1.123589586 | EXOSC1         |                 |                 |
| 227696 at    | EXOSC6      | 0.578764833   | 1.123589586 |                |                 |                 |
| 1552314 a at | EYA3        | 0.813835833   | 0.393887585 |                |                 |                 |
| 206379 at    | EYA3        | 0.813787333   | 0.393887585 |                |                 |                 |
| 226170 at    | EYA3        | 0.6192655     | 3.701646186 |                |                 |                 |
| 211310 at    | EZH1        | 1.518325      | 0           | EZH1           |                 |                 |
| 32259 at     | EZH1        | 0.674427167   | 0.230227638 | EZH1           |                 |                 |
| 221664 s at  | F11R        | 0.904291667   | 0.137080273 |                |                 |                 |
| 206429 at    | F2RL1       | 2.696702667   | 0           |                |                 |                 |
| 213506 at    | F2RL1       | 2.320999833   | 0           |                |                 |                 |
| 204363 at    | F3          | -0.764963333  | 0.137080273 | F3             | F3              |                 |
| 220285 at    | FAM108B1    | -0.7099855    | 2.499099453 | FAM108B1       | FAM18B1         |                 |
| 228872 at    | FAM108B1    | -0.690726333  | 3.701646186 | FAM108B1       | FAM18B1         |                 |
| 226697 at    | FAM114A1    | 0.556128333   | 1.455154512 |                |                 |                 |
| 218588 s at  | FAM114A2    | 0.789795      | 1.123589586 |                |                 |                 |

| Probe Set ID | Gene Symbol                  | miR-128-miRNC | q value (%) | miR-128 tgts_M | miR-128 tgts_TS | miR-128 tgts_PT |
|--------------|------------------------------|---------------|-------------|----------------|-----------------|-----------------|
| 203504_s_at  | ABCA1                        | -1.2890325    | 0           | ABCA1          | ABCA1           | ABCA1           |
| 219629_at    | FAM118A                      | 0.659096333   | 1.810509752 |                |                 |                 |
| 1553743_at   | FAM119A                      | 0.756456      | 1.810509752 |                |                 |                 |
| 235177_at    | FAM119A                      | 0.5399755     | 3.701646186 |                |                 |                 |
| 235931_at    | FAM119A                      | 0.5401475     | 3.029425085 |                |                 |                 |
| 226774_at    | FAM120B                      | -0.517241333  | 0.393887585 |                |                 |                 |
| 222673_x_at  | FAM122B                      | -0.8918295    | 0.796301331 | FAM122B        |                 |                 |
| 225361_x_at  | FAM122B                      | -0.870126833  | 1.123589586 | FAM122B        |                 |                 |
| 201828_x_at  | FAM127A                      | -0.793982833  | 1.455154512 |                |                 |                 |
| 212995_x_at  | FAM128B                      | -0.721113333  | 1.123589586 |                |                 |                 |
| 221904_at    | FAM131A                      | 0.5389135     | 2.499099453 |                |                 |                 |
| 218037_at    | FAM134A                      | 0.5148375     | 3.029425085 |                |                 |                 |
| 221983_at    | FAM134A                      | 0.655427333   | 0.230227638 |                |                 |                 |
| 221984_s_at  | FAM134A                      | 0.5386775     | 1.455154512 |                |                 |                 |
| 223497_at    | FAM135A                      | 0.877333      | 3.029425085 | FAM135A        |                 |                 |
| 213896_x_at  | FAM149B1                     | 0.554656667   | 1.810509752 |                |                 |                 |
| 238859_at    | FAM149B1                     | 0.567387333   | 1.455154512 |                |                 |                 |
| 214825_at    | FAM155A                      | -0.544078833  | 1.810509752 | FAM155A        | FAM155A         |                 |
| 1569465_at   | FAM160A1                     | 1.270455833   | 1.455154512 |                |                 |                 |
| 242687_at    | FAM160A1                     | 1.107036333   | 0.550502435 |                |                 |                 |
| 226155_at    | FAM160B1                     | 0.858650833   | 0           |                |                 |                 |
| 231615_at    | FAM164A                      | 0.639974333   | 3.701646186 |                |                 |                 |
| 233971_at    | FAM166A                      | -1.223355833  | 0.137080273 |                |                 |                 |
| 226614_s_at  | FAM167A                      | -0.518301667  | 1.123589586 |                |                 |                 |
| 213954_at    | FAM169A                      | 0.538367833   | 1.810509752 |                |                 |                 |
| 242762_s_at  | FAM171B                      | 0.541995167   | 2.499099453 |                |                 |                 |
| 226521_s_at  | FAM175A                      | 0.644715667   | 2.499099453 |                |                 |                 |
| 227828_s_at  | FAM176A                      | -0.5067735    | 2.499099453 | FAM176A        |                 |                 |
| 1557141_at   | FAM188B /// INMT             | 0.628622667   | 3.029425085 |                |                 |                 |
| 217896_s_at  | FAM192A                      | -0.506375333  | 2.499099453 | FAM192A        |                 |                 |
| 223791_at    | FAM27A /// FAM27B /// FAM27C | 0.6170755     | 3.701646186 |                |                 |                 |
| 201889_at    | FAM3C                        | 1.405462667   | 0.05396551  |                |                 |                 |
| 218023_s_at  | FAM53C                       | -0.683539167  | 0.137080273 |                |                 |                 |
| 234944_s_at  | FAM54A                       | -0.567979667  | 2.499099453 |                |                 |                 |
| 217540_at    | FAM55C                       | 1.021577833   | 0.796301331 |                |                 |                 |
| 235030_at    | FAM55C                       | 0.869890667   | 0.550502435 |                |                 |                 |
| 243011_at    | FAM55C                       | 0.901166      | 0.230227638 |                |                 |                 |
| 243606_at    | FAM55C                       | 0.700376667   | 3.029425085 |                |                 |                 |
| 223038_s_at  | FAM60A /// LOC728115         | 0.599896667   | 1.123589586 |                |                 |                 |
| 216044_x_at  | FAM69A                       | -0.691249667  | 0.137080273 |                |                 |                 |
| 222665_at    | FAM82B                       | -0.523494667  | 2.499099453 |                |                 |                 |
| 1563900_at   | FAM83B                       | 1.350681833   | 0           |                |                 |                 |
| 225687_at    | FAM83D                       | -0.792328333  | 0.230227638 |                |                 |                 |
| 226448_at    | FAM89A                       | 0.634665      | 2.499099453 |                |                 |                 |
| 203420_at    | FAM8A1                       | 0.671458333   | 1.455154512 |                |                 |                 |
| 203564_at    | FANCG                        | -0.7518485    | 1.123589586 |                |                 |                 |
| 213007_at    | FANCI                        | -0.5225415    | 2.499099453 |                |                 |                 |

| Probe Set ID | Gene Symbol | miR-128-miRNC | q value (%) | miR-128 tgts_M | miR-128 tgts_TS | miR-128 tgts_PT |
|--------------|-------------|---------------|-------------|----------------|-----------------|-----------------|
| 203504 s at  | ABCA1       | -1.2890325    | 0           | ABCA1          | ABCA1           | ABCA1           |
| 209955 s at  | FAP         | 0.554273333   | 0.230227638 |                |                 |                 |
| 224865 at    | FAR1        | -0.7257585    | 0.393887585 | FAR1           |                 | FAR1            |
| 227996 at    | FARP1       | 0.605374333   | 1.810509752 | FARP1          |                 |                 |
| 239246 at    | FARP1       | 0.611992667   | 0.137080273 | FARP1          |                 |                 |
| 212218 s at  | FASN        | -0.758701     | 2.499099453 |                |                 |                 |
| 1555480 a at | FBLIM1      | 0.688801167   | 2.499099453 | FBLIM1         |                 |                 |
| 225258 at    | FBLIM1      | 0.772166833   | 0.05396551  | FBLIM1         |                 |                 |
| 229247 at    | FBLN7       | 0.637008      | 0           |                |                 |                 |
| 1553798 a at | FBXL13      | 1.058953333   | 0.05396551  |                |                 |                 |
| 242034 at    | FBXL17      | 0.8820765     | 1.810509752 |                |                 |                 |
| 212229 s at  | FBXO21      | -0.667261167  | 3.029425085 | FBXO21         | FBXO21          |                 |
| 225803 at    | FBXO32      | 1.088443667   | 0           |                |                 |                 |
| 241763 s at  | FBXO32      | 0.9184085     | 0.393887585 |                |                 |                 |
| 225099 at    | FBXO45      | 0.512836667   | 0.550502435 |                |                 |                 |
| 242294 at    | FBXO45      | 1.262634833   | 0           |                |                 |                 |
| 209630 s at  | FBXW2       | -0.676158333  | 1.123589586 | FBXW2          |                 |                 |
| 1555153 s at | FCHO2       | 0.661533333   | 0.393887585 |                |                 |                 |
| 1554360 at   | FCHSD2      | 0.648006333   | 0.550502435 |                |                 |                 |
| 204767 s at  | FEN1        | -0.916958333  | 0.137080273 |                |                 |                 |
| 204768 s at  | FEN1        | -1.21914      | 0           |                |                 |                 |
| 206412 at    | FER         | 0.746803667   | 0           |                |                 |                 |
| 209210 s at  | FERMT2      | 0.500631667   | 1.810509752 |                |                 |                 |
| 214212 x at  | FERMT2      | 0.698858667   | 0.796301331 |                |                 |                 |
| 230559 x at  | FGD4        | 1.314932      | 0           |                |                 |                 |
| 242445 at    | FGD4        | 0.58947       | 3.029425085 |                |                 |                 |
| 1552721 a at | FGF1        | -0.691226833  | 1.455154512 | FGF1           |                 |                 |
| 205117 at    | FGF1        | -0.9124515    | 0.230227638 | FGF1           |                 |                 |
| 208240 s at  | FGF1        | -0.521666     | 0.393887585 | FGF1           |                 |                 |
| 207501 s at  | FGF12       | 0.945248833   | 0           |                |                 |                 |
| 205014 at    | FGFBP1      | -0.627925833  | 0           |                |                 |                 |
| 1556282 at   | FGFR1OP2    | 1.102928333   | 0           |                |                 |                 |
| 243619 at    | FGFR1OP2    | 0.945357667   | 1.455154512 |                |                 |                 |
| 206492 at    | FHIT        | 1.102788      | 1.123589586 |                |                 |                 |
| 218980 at    | FHOD3       | 0.592187167   | 1.123589586 |                |                 |                 |
| 219249 s at  | FKBP10      | 0.9156675     | 0.393887585 |                |                 |                 |
| 219117 s at  | FKBP11      | 0.550765333   | 0.230227638 |                |                 |                 |
| 219390 at    | FKBP14      | 0.898667167   | 0.137080273 |                |                 |                 |
| 235311 at    | FKBP14      | 0.815646167   | 0.796301331 |                |                 |                 |
| 1568717 a at | FKBP15      | 0.654986167   | 0.796301331 |                |                 |                 |
| 200894 s at  | FKBP4       | 0.760743333   | 1.123589586 |                |                 |                 |
| 200895 s at  | FKBP4       | 0.904828      | 0.393887585 |                |                 |                 |
| 224856 at    | FKBP5       | 0.742598833   | 0.230227638 |                |                 |                 |
| 224002 s at  | FKBP7       | 1.668450333   | 0           |                |                 |                 |
| 212169 at    | FKBP9       | -1.402643     | 0           | FKBP9          |                 |                 |
| 235291 s at  | FLJ32255    | 1.108581      | 0           |                |                 |                 |
| 235292 at    | FLJ32255    | 0.604698      | 3.701646186 |                |                 |                 |
| 230047 at    | FLJ32810    | 0.707257      | 3.029425085 |                |                 |                 |
| 239421 at    | FLJ35776    | 0.706133      | 2.499099453 |                |                 |                 |
| 1559614 at   | FLJ38773    | -0.538285     | 3.029425085 |                |                 |                 |
| 221944 at    | FLJ42627    | 0.8218485     | 0.393887585 |                |                 |                 |

| Probe Set ID | Gene Symbol   | miR-128-miRNC | q value (%) | miR-128 tgts_M | miR-128 tgts_TS | miR-128 tgts_PT |
|--------------|---------------|---------------|-------------|----------------|-----------------|-----------------|
| 203504 s at  | ABCA1         | -1.2890325    | 0           | ABCA1          | ABCA1           | ABCA1           |
| 226419 s at  | FLJ44342      | 0.561832167   | 3.029425085 |                |                 |                 |
| 1565786 x at | FLJ45482      | -0.638126167  | 1.810509752 |                |                 |                 |
| 213746 s at  | FLNA          | -0.857509333  | 1.810509752 |                |                 |                 |
| 214752 x at  | FLNA          | -1.060998     | 2.499099453 |                |                 |                 |
| 240259 at    | FLRT2         | -0.940517833  | 0.05396551  |                | FLRT2           | FLRT2           |
| 1570156 s at | FMN1          | 0.610484167   | 3.029425085 |                |                 |                 |
| 1569257 at   | FMNL1         | 0.925775      | 1.123589586 |                |                 |                 |
| 232249 at    | FMNL3         | 0.972789      | 0           |                |                 |                 |
| 1558199 at   | FN1           | 0.748224      | 0.796301331 | FN1            |                 |                 |
| 202304 at    | FNDC3A        | 0.505753333   | 3.701646186 | FNDC3A         |                 |                 |
| 238961 s at  | FNDC3A        | 0.592138333   | 0.05396551  | FNDC3A         |                 |                 |
| 241611 s at  | FNDC3A        | 0.679973333   | 0           | FNDC3A         |                 |                 |
| 218618 s at  | FNDC3B        | 0.540646667   | 2.499099453 |                |                 |                 |
| 222692 s at  | FNDC3B        | 0.908008333   | 0.393887585 |                |                 |                 |
| 222693 at    | FNDC3B        | 0.806825      | 1.123589586 |                |                 |                 |
| 225922 at    | FNIP2         | 0.700633667   | 1.123589586 |                |                 |                 |
| 225924 at    | FNIP2         | 1.015592667   | 0           |                |                 |                 |
| 226460 at    | FNIP2         | 0.922404667   | 0.137080273 |                |                 |                 |
| 211074 at    | FOLR1         | -0.895653333  | 0.796301331 |                |                 |                 |
| 213972 at    | FOXD1         | -0.638863333  | 1.810509752 |                |                 |                 |
| 206377 at    | FOXF2         | 0.839572333   | 0.230227638 |                |                 |                 |
| 217310 s at  | FOXJ3         | 0.649958667   | 0.550502435 |                |                 |                 |
| 202580 x at  | FOXM1         | -0.671247167  | 3.029425085 |                |                 |                 |
| 224889 at    | FOXO3         | 0.574267333   | 1.455154512 |                |                 |                 |
| 231548 at    | FOXO3         | 0.568736333   | 1.455154512 |                |                 |                 |
| 224837 at    | FOXP1         | 0.527543      | 0.230227638 |                |                 |                 |
| 224838 at    | FOXP1         | 0.506790333   | 1.123589586 |                |                 |                 |
| 209864 at    | FRAT2         | 0.818052      | 1.455154512 |                |                 |                 |
| 213056 at    | FRMD4B        | 0.567706333   | 3.701646186 |                |                 |                 |
| 1569470 a at | FRMD5         | 0.722294      | 0           |                |                 |                 |
| 238486 at    | FRS2          | 0.689439333   | 1.123589586 |                |                 |                 |
| 212548 s at  | FRYL          | -0.8388505    | 1.455154512 | FRYL           | FRYL            |                 |
| 214211 at    | FTH1          | -0.534325     | 0.796301331 |                |                 |                 |
| 205324 s at  | FTSJ1         | -0.525879167  | 0           |                |                 |                 |
| 223042 s at  | FUNDC2        | 0.6225445     | 0.550502435 |                |                 |                 |
| 1565717_s_at | FUS /// NR1H3 | -0.567770833  | 3.029425085 |                |                 |                 |
| 206109 at    | FUT1          | 2.0536745     | 3.029425085 |                |                 |                 |
| 239020 at    | FUT10         | 0.509116667   | 1.455154512 |                |                 |                 |
| 238551 at    | FUT11         | 0.76352       | 0           | FUT11          |                 |                 |
| 209892 at    | FUT4          | 0.739183167   | 3.701646186 |                |                 |                 |
| 209893 s at  | FUT4          | 0.674763833   | 3.701646186 |                |                 |                 |
| 1554930 a at | FUT8          | 0.543743333   | 0.796301331 | FUT8           |                 |                 |
| 203988 s at  | FUT8          | 0.510815333   | 3.029425085 | FUT8           |                 |                 |
| 1555523 a at | FYCO1         | 0.548814833   | 3.029425085 |                |                 |                 |
| 218204 s at  | FYCO1         | 0.929706333   | 0.137080273 |                |                 |                 |
| 227405 s at  | FZD8          | 0.948250167   | 1.123589586 |                |                 |                 |
| 223254 s at  | G2E3          | 0.529837      | 2.499099453 |                |                 |                 |
| 207112 s at  | GAB1          | -0.942176667  | 0.05396551  |                |                 |                 |
| 225998 at    | GAB1          | -0.534278667  | 3.029425085 |                |                 |                 |

| Probe Set ID | Gene Symbol         | miR-128-miRNC | q value (%) | miR-128 tgts_M | miR-128 tgts_TS | miR-128 tgts_PT |
|--------------|---------------------|---------------|-------------|----------------|-----------------|-----------------|
| 203504 s at  | ABCA1               | -1.2890325    | 0           | ABCA1          | ABCA1           | ABCA1           |
| 203146 s at  | GABBR1              | 0.619830667   | 1.123589586 | GABBR1         |                 |                 |
| 238569 at    | GABBR1              | 1.328126167   | 0           | GABBR1         |                 |                 |
| 205219 s at  | GALK2               | 0.598981667   | 1.123589586 |                |                 |                 |
| 207357 s at  | GALNT10             | 0.6230045     | 1.455154512 | GALNT10        |                 |                 |
| 212256 at    | GALNT10             | 0.638681667   | 1.123589586 | GALNT10        |                 |                 |
| 229555 at    | GALNT5              | 0.849871167   | 3.701646186 | GALNT5         |                 |                 |
| 219956 at    | GALNT6              | 1.11698       | 0           |                |                 |                 |
| 228303 at    | GALNT6              | 1.034632333   | 2.499099453 |                |                 |                 |
| 220124 at    | GAN                 | 0.988345      | 1.455154512 |                |                 |                 |
| 216990 at    | GART                | 0.500018333   | 1.810509752 |                |                 |                 |
| 230097 at    | GART                | 0.984167333   | 0.137080273 |                |                 |                 |
| 244822 at    | GART                | 0.972771833   | 0           |                |                 |                 |
| 1598 g at    | GAS6                | -0.856268     | 0.393887585 |                |                 |                 |
| 214711 at    | GATC                | 0.760762667   | 0.550502435 |                |                 |                 |
| 225430 at    | GATC                | 0.526358333   | 0.230227638 |                |                 |                 |
| 224627 at    | GBA2                | 0.902226      | 0.393887585 |                |                 |                 |
| 202269 x at  | GBP1                | 1.144951167   | 0           |                |                 |                 |
| 231577 s at  | GBP1                | 1.436445667   | 0           |                |                 |                 |
| 202748 at    | GBP2                | 0.791088667   | 0           |                |                 |                 |
| 203765 at    | GCA                 | 1.0933865     | 0.137080273 | GCA            |                 |                 |
| 211020 at    | GCNT2               | -0.547862667  | 1.123589586 | GCNT2          | GCNT2           |                 |
| 230788 at    | GCNT2               | -0.538286333  | 3.029425085 | GCNT2          | GCNT2           |                 |
| 226271 at    | GDAP1               | -0.508718     | 2.499099453 | GDAP1          |                 |                 |
| 201864 at    | GDI1                | 0.557404333   | 1.455154512 |                |                 |                 |
| 1555606 a at | GDPD1               | 0.989425833   | 0.550502435 |                |                 |                 |
| 219722 s at  | GDPD3               | 0.7409955     | 0.230227638 |                |                 |                 |
| 225712 at    | GEMIN5              | 0.731786333   | 0.796301331 |                |                 |                 |
| 225158 at    | GFM1                | -0.686365833  | 0.796301331 | GFM1           |                 |                 |
| 205100 at    | GFPT2               | -1.125707667  | 0           |                | GFPT2           | GFPT2           |
| 232024 at    | GIMAP2              | 1.804540167   | 0.05396551  |                |                 |                 |
| 1554345 a at | GIN1                | 0.638484833   | 1.455154512 |                |                 |                 |
| 206102 at    | GINS1               | -0.9834965    | 1.455154512 |                |                 |                 |
| 229311 at    | GKAP1               | 0.851190167   | 1.123589586 |                |                 |                 |
| 229312 s at  | GKAP1               | 0.875646667   | 0.796301331 |                |                 |                 |
| 213552 at    | GLCE                | 1.093316833   | 0           |                |                 |                 |
| 226136 at    | GLIPR1              | -0.583114667  | 0.550502435 |                |                 |                 |
| 230258 at    | GLIS3               | 1.256774833   | 0           |                |                 |                 |
| 221932 s at  | GLRX5               | -0.8668455    | 0.550502435 | GLRX5          |                 |                 |
| 203158 s at  | GLS                 | 1.189056333   | 0.137080273 |                |                 |                 |
| 221447 s at  | GLT8D2              | 0.56287       | 1.123589586 |                |                 |                 |
| 227070 at    | GLT8D2              | 0.818315333   | 0.550502435 |                |                 |                 |
| 219267 at    | GLTP                | -0.845503333  | 0.550502435 | GLTP           | GLTP            | GLTP            |
| 226177 at    | GLTP                | -0.9609485    | 0           | GLTP           | GLTP            | GLTP            |
| 218506 x at  | GLYR1               | 0.617311167   | 3.701646186 |                |                 |                 |
| 221628 s at  | GLYR1               | 0.860622833   | 0.230227638 |                |                 |                 |
| 234488_s_at  | GMCL1 ///<br>GMCL1L | 0.611697833   | 3.029425085 |                |                 |                 |
| 220938_s_at  | GMEB1               | 0.561123833   | 3.029425085 |                |                 |                 |
| 224681 at    | GNA12               | -0.663404167  | 3.029425085 | GNA12          |                 |                 |
| 224861 at    | GNAQ                | 0.6131945     | 3.029425085 |                |                 |                 |

| Probe Set ID | Gene Symbol                                                  | miR-128-miRNC | q value (%) | miR-128 tgts_M | miR-128 tgts_TS | miR-128 tgts_PT |
|--------------|--------------------------------------------------------------|---------------|-------------|----------------|-----------------|-----------------|
| 203504_s_at  | ABCA1                                                        | -1.2890325    | 0           | ABCA1          | ABCA1           | ABCA1           |
| 212294_at    | GNG12                                                        | -0.572563333  | 0.137080273 |                | GNG12           | GNG12           |
| 222834_s_at  | GNG12                                                        | -0.503745     | 1.123589586 |                | GNG12           | GNG12           |
| 238487_at    | GNL1                                                         | -0.751193333  | 2.499099453 |                |                 |                 |
| 239068_at    | GNL1                                                         | -0.796985833  | 0.230227638 |                |                 |                 |
| 1553067_a_at | GNRHR2                                                       | -0.511494833  | 2.499099453 |                |                 |                 |
| 226949_at    | GOLGA3                                                       | 0.514736167   | 0.796301331 |                |                 |                 |
| 208797_s_at  | GOLGA8A                                                      | 0.640476667   | 1.123589586 | GOLGA8A        |                 |                 |
| 213650_at    | GOLGA8A<br>///<br>GOLGA8B                                    | 0.537438333   | 3.029425085 |                |                 |                 |
| 213020_at    | GOSR1                                                        | 0.8339595     | 0.796301331 | GOSR1          |                 |                 |
| 200708_at    | GOT2                                                         | -0.615498333  | 0.393887585 | GOT2           |                 |                 |
| 225424_at    | GPAM                                                         | -0.574378333  | 1.455154512 | GPAM           | GPAM            | GPAM            |
| 236026_at    | GPATCH2                                                      | -0.548504833  | 0.796301331 | GPATCH2        |                 |                 |
| 222452_s_at  | GPBP1L1                                                      | 0.586271667   | 0.230227638 |                |                 |                 |
| 212510_at    | GPD1L                                                        | 0.533826667   | 0.550502435 |                |                 |                 |
| 211613_s_at  | GPD2                                                         | -0.785762     | 0.796301331 | GPD2           | GPD2            |                 |
| 225447_at    | GPD2                                                         | -0.651808333  | 0           | GPD2           | GPD2            |                 |
| 201141_at    | GPNMB                                                        | -1.255051667  | 0           | GPNMB          |                 |                 |
| 211977_at    | GPR107                                                       | 0.624134833   | 0.796301331 |                |                 |                 |
| 221814_at    | GPR124                                                       | 1.2945825     | 0.393887585 |                |                 |                 |
| 204137_at    | GPR137B                                                      | 0.9410395     | 1.123589586 |                |                 |                 |
| 230369_at    | GPR161                                                       | 1.030728      | 0           | GPR161         |                 |                 |
| 212070_at    | GPR56                                                        | 1.307611667   | 0           |                |                 |                 |
| 220993_s_at  | GPR63                                                        | 0.576157      | 2.499099453 |                |                 |                 |
| 203108_at    | GPRC5A                                                       | -0.776711667  | 0           |                |                 |                 |
| 201348_at    | GPX3                                                         | 0.815852833   | 1.123589586 |                |                 |                 |
| 206204_at    | GRB14                                                        | 1.3526055     | 0           |                |                 |                 |
| 218468_s_at  | GREM1                                                        | -1.6777955    | 0           | GREM1          | GREM1           | GREM1           |
| 218469_at    | GREM1                                                        | -1.675781333  | 0           | GREM1          | GREM1           | GREM1           |
| 229883_at    | GRIN2D                                                       | -1.226445     | 0.550502435 |                | GRIN2D          |                 |
| 238427_at    | GRPEL2                                                       | 0.507318333   | 1.123589586 |                |                 |                 |
| 219233_s_at  | GSDMB                                                        | 0.685728667   | 1.810509752 |                |                 |                 |
| 225276_at    | GSPT1                                                        | -0.684118833  | 0.05396551  |                |                 | GSPT1           |
| 243325_at    | GSTK1                                                        | 1.338129833   | 0           |                |                 |                 |
| 204149_s_at  | GSTM4                                                        | 2.044851667   | 0           |                |                 |                 |
| 210912_x_at  | GSTM4                                                        | 1.672022      | 0           |                |                 |                 |
| 200824_at    | GSTP1                                                        | -0.795384167  | 3.701646186 |                |                 |                 |
| 219770_at    | GTDC1                                                        | 1.140108      | 0           |                |                 |                 |
| 238585_at    | GTDC1                                                        | 1.112458333   | 0           |                |                 |                 |
| 202678_at    | GTF2A2                                                       | -0.73523      | 0.796301331 | GTF2A2         |                 | GTF2A2          |
| 205930_at    | GTF2E1                                                       | 0.7167185     | 0.393887585 |                |                 |                 |
| 221540_x_at  | GTF2H2<br>///<br>GTF2H2B<br>///<br>GTF2H2C<br>///<br>GTF2H2D | -0.505755333  | 3.701646186 |                |                 |                 |
| 215470_at    | GTF2H2B                                                      | 0.5689435     | 1.810509752 | GTF2H2B        |                 |                 |
| 215569_at    | GTF2IRD2<br>///<br>GTF2IRD2B                                 | 0.828984      | 2.499099453 |                |                 |                 |
| 204318_s_at  | GTSE1                                                        | -0.6601145    | 1.455154512 |                |                 |                 |



| Probe Set ID | Gene Symbol | miR-128-miRNC | q value (%) | miR-128 tgts_M | miR-128 tgts_TS | miR-128 tgts_PT |
|--------------|-------------|---------------|-------------|----------------|-----------------|-----------------|
| 203504_s_at  | ABCA1       | -1.2890325    | 0           | ABCA1          | ABCA1           | ABCA1           |
| 215915_at    | GULP1       | -0.782919667  | 0.230227638 |                |                 |                 |
| 1555568_at   | GUSBL1      | 0.549692833   | 0.796301331 |                |                 |                 |
| 212205_at    | H2AFV       | -1.381255167  | 0           |                |                 |                 |
| 212206_s_at  | H2AFV       | -0.7695525    | 0.05396551  |                |                 |                 |
| 205436_s_at  | H2AFX       | -1.504254333  | 0.05396551  |                |                 |                 |
| 213344_s_at  | H2AFX       | -1.3971905    | 0           |                |                 |                 |
| 214500_at    | H2AFY       | -0.857136667  | 0.550502435 | H2AFY          |                 |                 |
| 214501_s_at  | H2AFY       | -0.588381667  | 1.123589586 | H2AFY          |                 |                 |
| 211998_at    | H3F3B       | -0.9749575    | 0.137080273 | H3F3B          | H3F3B           | H3F3B           |
| 209252_at    | HARS2       | -0.6125955    | 1.810509752 |                |                 |                 |
| 222685_at    | HAUS6       | -1.077225     | 0           |                |                 |                 |
| 1555673_at   | hCG_1749898 | 1.211810667   | 0.05396551  |                |                 |                 |
| 242141_at    | HDAC2       | 0.803699333   | 1.455154512 |                |                 |                 |
| 206846_s_at  | HDAC6       | 0.686516      | 3.029425085 |                |                 |                 |
| 1552758_at   | HDAC9       | 0.585769      | 0.393887585 | HDAC9          |                 |                 |
| 1552760_at   | HDAC9       | 1.251275      | 0           | HDAC9          |                 |                 |
| 234393_at    | HDAC9       | 1.072839833   | 0           | HDAC9          |                 |                 |
| 222916_s_at  | HDLBP       | -0.9167365    | 1.455154512 |                |                 |                 |
| 225012_at    | HDLBP       | -0.775575833  | 0           |                |                 |                 |
| 1554478_a_at | HEATR3      | 0.951359833   | 1.810509752 |                |                 |                 |
| 232498_at    | HEATR7A     | 0.845603167   | 1.455154512 |                |                 |                 |
| 203430_at    | HEBP2       | 0.530570667   | 1.810509752 |                |                 |                 |
| 218603_at    | HECA        | 0.514885333   | 1.455154512 |                |                 |                 |
| 232080_at    | HECW2       | 0.966497833   | 0.137080273 |                |                 |                 |
| 213069_at    | HEG1        | -0.705301667  | 0           |                | HEG1            |                 |
| 1552787_at   | HELB        | 1.3801945     | 0           | HELB           |                 |                 |
| 1552788_a_at | HELB        | 1.0877875     | 0           | HELB           |                 |                 |
| 220085_at    | HELLS       | -0.5625335    | 0.796301331 |                |                 |                 |
| 223556_at    | HELLS       | -1.023520667  | 0.137080273 |                |                 |                 |
| 227349_at    | HELLS       | -1.358494     | 0           |                |                 |                 |
| 228736_at    | HELQ        | 1.2035745     | 0           |                |                 |                 |
| 1553402_a_at | HFE         | 0.811214167   | 1.455154512 | HFE            |                 |                 |
| 220387_s_at  | HHLA3       | 1.567653333   | 0           |                |                 |                 |
| 234665_x_at  | HHLA3       | 0.711887      | 3.701646186 |                |                 |                 |
| 234703_at    | HHLA3       | 1.411044      | 1.123589586 |                |                 |                 |
| 223073_at    | HIATL1      | -0.587603333  | 3.701646186 |                |                 |                 |
| 226648_at    | HIF1AN      | 0.668576667   | 1.455154512 |                |                 |                 |
| 1555960_at   | HINT1       | 0.5679615     | 3.701646186 |                |                 |                 |
| 205425_at    | HIP1        | 1.386643667   | 0           | HIP1           | HIP1            |                 |
| 1552516_a_at | HIPK1       | 1.370240333   | 0           |                |                 |                 |
| 212291_at    | HIPK1       | 1.589518667   | 0           |                |                 |                 |
| 212293_at    | HIPK1       | 1.228114833   | 0           |                |                 |                 |
| 204578_at    | HISPPD2A    | 0.7036855     | 0.550502435 |                |                 |                 |
| 214534_at    | HIST1H1B    | -1.048957333  | 0           |                |                 |                 |
| 208553_at    | HIST1H1E    | -1.320174833  | 0.796301331 |                |                 |                 |
| 208569_at    | HIST1H2AB   | -0.7483065    | 1.123589586 |                |                 |                 |
| 208583_x_at  | HIST1H2AJ   | -1.0089545    | 0.796301331 |                |                 |                 |
| 222067_x_at  | HIST1H2BD   | -0.606986167  | 3.029425085 |                |                 |                 |
| 208527_x_at  | HIST1H2BE   | -0.632988333  | 2.499099453 |                |                 |                 |

| Probe Set ID | Gene Symbol                  | miR-128-miRNC | q value (%) | miR-128 tgts_M | miR-128 tgts_TS | miR-128 tgts_PT |
|--------------|------------------------------|---------------|-------------|----------------|-----------------|-----------------|
| 203504_s_at  | ABCA1                        | -1.2890325    | 0           | ABCA1          | ABCA1           | ABCA1           |
| 208490_x_at  | HIST1H2BF                    | -0.893058333  | 0.550502435 |                |                 |                 |
| 215779_s_at  | HIST1H2BG                    | -0.7014015    | 3.029425085 |                |                 |                 |
| 208546_x_at  | HIST1H2BH                    | -0.947511667  | 0.393887585 |                |                 |                 |
| 208523_x_at  | HIST1H2BI                    | -0.756486     | 2.499099453 |                |                 |                 |
| 208576_s_at  | HIST1H3B                     | -1.6626765    | 0           |                |                 |                 |
| 208577_at    | HIST1H3C                     | -1.153892333  | 0           |                |                 |                 |
| 206951_at    | HIST1H4E                     | -0.550901667  | 0.137080273 |                |                 |                 |
| 218279_s_at  | HIST2H2AA3                   | -1.357884167  | 0.05396551  |                |                 |                 |
| 214290_s_at  | HIST2H2AA3 ///<br>HIST2H2AA4 | -1.337889     | 0.550502435 |                |                 |                 |
| 218280_x_at  | HIST2H2AA3 ///<br>HIST2H2AA4 | -1.0537915    | 0.550502435 |                |                 |                 |
| 218726_at    | HJURP                        | -1.0162495    | 0.230227638 |                |                 |                 |
| 215313_x_at  | HLA-A                        | 0.539791667   | 2.499099453 | HLA-A          |                 |                 |
| 209140_x_at  | HLA-B                        | 0.544056667   | 2.499099453 | HLA-B          |                 |                 |
| 208812_x_at  | HLA-C                        | 0.666533333   | 1.123589586 |                |                 |                 |
| 214459_x_at  | HLA-C                        | 0.609155      | 2.499099453 |                |                 |                 |
| 1558561_at   | HM13                         | 0.776145333   | 1.455154512 |                |                 |                 |
| 219269_at    | HMBOX1                       | 0.561059667   | 1.455154512 | HMBOX1         |                 |                 |
| 210719_s_at  | HMG20B                       | -1.004254167  | 3.701646186 |                |                 |                 |
| 1567223_at   | HMGA2                        | -0.700883333  | 1.455154512 | HMGA2          |                 |                 |
| 1567224_at   | HMGA2                        | -0.71614      | 1.810509752 | HMGA2          |                 |                 |
| 224731_at    | HMGB1                        | -0.659675     | 1.455154512 |                |                 |                 |
| 203744_at    | HMGB3                        | -0.63104      | 0.393887585 | HMGB3          | HMGB3           | HMGB3           |
| 225601_at    | HMGB3                        | -0.608409333  | 3.029425085 | HMGB3          | HMGB3           | HMGB3           |
| 208668_x_at  | HMG2                         | -0.803446667  | 0.550502435 |                |                 |                 |
| 209377_s_at  | HMG3                         | -0.5778445    | 3.029425085 | HMG3           |                 |                 |
| 207456_at    | HNF4G                        | 1.375739333   | 0           |                | HNF4G           |                 |
| 222040_at    | HNRNPA1                      | -0.587354     | 0.796301331 | HNRNPA1        |                 |                 |
| 200072_s_at  | HNRNPM                       | -0.521988333  | 3.701646186 |                |                 |                 |
| 209068_at    | HNRPD                        | -0.572977     | 1.455154512 |                |                 |                 |
| 225386_s_at  | HNRPLL                       | 1.05398       | 0           | HNRPLL         |                 |                 |
| 226651_at    | HOMER1                       | 0.9924535     | 1.123589586 | HOMER1         |                 |                 |
| 226395_at    | HOOK3                        | 0.753454      | 1.455154512 |                |                 |                 |
| 214639_s_at  | HOXA1                        | 0.734355      | 3.029425085 |                |                 |                 |
| 205453_at    | HOXB2                        | -0.574344     | 2.499099453 |                |                 |                 |
| 1554251_at   | HP1BP3                       | -0.7042245    | 1.810509752 | HP1BP3         |                 |                 |
| 224591_at    | HP1BP3                       | -0.521819     | 0.550502435 | HP1BP3         |                 |                 |
| 224592_x_at  | HP1BP3                       | -0.522267333  | 3.029425085 | HP1BP3         |                 |                 |
| 219403_s_at  | HPSE                         | 2.261590667   | 0           |                |                 |                 |
| 205579_at    | HRH1                         | 1.071519167   | 0.05396551  |                |                 |                 |
| 205580_s_at  | HRH1                         | 0.706685333   | 1.810509752 |                |                 |                 |
| 205404_at    | HSD11B1                      | 0.714428667   | 0           |                |                 |                 |
| 204818_at    | HSD17B2                      | 0.615541667   | 1.455154512 |                |                 |                 |
| 201413_at    | HSD17B4                      | 0.511663333   | 0.796301331 |                |                 |                 |
| 214434_at    | HSPA12A                      | 1.047420833   | 0           |                |                 |                 |

| Probe Set ID | Gene Symbol | miR-128-miRNC | q value (%) | miR-128 tgts_M | miR-128 tgts_TS | miR-128 tgts_PT |
|--------------|-------------|---------------|-------------|----------------|-----------------|-----------------|
| 203504_s_at  | ABCA1       | -1.2890325    | 0           | ABCA1          | ABCA1           | ABCA1           |
| 227650_at    | HSPA14      | -0.535013667  | 1.123589586 | HSPA14         |                 |                 |
| 200799_at    | HSPA1A      | 0.912225833   | 0.550502435 |                |                 |                 |
| 201841_s_at  | HSPB1       | -0.901319667  | 3.029425085 |                |                 |                 |
| 219998_at    | HSPC159     | 0.527871167   | 0.550502435 |                |                 |                 |
| 226188_at    | HSPC159     | 1.208141333   | 0.05396551  |                |                 |                 |
| 236281_x_at  | HTR7        | 1.420861833   | 0           |                |                 |                 |
| 204883_s_at  | HUS1        | 0.718440667   | 0.796301331 | HUS1           |                 |                 |
| 202637_s_at  | ICAM1       | 1.12393       | 0           |                |                 |                 |
| 202638_s_at  | ICAM1       | 1.2194745     | 0           |                |                 |                 |
| 215485_s_at  | ICAM1       | 1.187157333   | 0           |                |                 |                 |
| 213620_s_at  | ICAM2       | 1.449273      | 0           |                |                 |                 |
| 212221_x_at  | IDS         | 0.729525833   | 0.796301331 | IDS            |                 |                 |
| 212223_at    | IDS         | 0.594967833   | 3.701646186 | IDS            |                 |                 |
| 36030_at     | IFFO1       | 1.231476333   | 0           |                |                 |                 |
| 225615_at    | IFFO2       | 1.078455167   | 0           | IFFO2          |                 |                 |
| 214453_s_at  | IFI44       | 1.190017333   | 0           |                |                 |                 |
| 219209_at    | IFIH1       | 1.2112655     | 0           |                |                 |                 |
| 201315_x_at  | IFITM2      | -0.552058333  | 3.029425085 |                |                 |                 |
| 204191_at    | IFNAR1      | 0.711883167   | 3.029425085 |                |                 |                 |
| 202727_s_at  | IFNGR1      | 0.761679333   | 0.550502435 |                |                 |                 |
| 211676_s_at  | IFNGR1      | 0.506792      | 1.455154512 |                |                 |                 |
| 201642_at    | IFNGR2      | 1.088279667   | 0           |                |                 |                 |
| 219174_at    | IFT74       | 0.574445333   | 2.499099453 |                |                 |                 |
| 61732_r_at   | IFT74       | 0.5241475     | 1.810509752 |                |                 |                 |
| 204703_at    | IFT88       | 0.847187      | 0           | IFT88          |                 |                 |
| 1563098_at   | IGFN1       | 1.072268333   | 0.796301331 |                |                 |                 |
| 202491_s_at  | IKBKAP      | 0.51449       | 1.810509752 | IKBKAP         |                 |                 |
| 209341_s_at  | IKBKB       | 0.5322755     | 0.550502435 | IKBKB          |                 |                 |
| 217371_s_at  | IL15        | 1.52344       | 0.796301331 |                |                 |                 |
| 207375_s_at  | IL15RA      | 0.826986167   | 1.123589586 |                |                 |                 |
| 227997_at    | IL17RD      | 0.980954167   | 3.701646186 |                |                 |                 |
| 205067_at    | IL1B        | 0.707715      | 0.05396551  |                |                 |                 |
| 39402_at     | IL1B        | 0.762493333   | 0           |                |                 |                 |
| 205926_at    | IL27RA      | 1.2808145     | 0           |                |                 |                 |
| 1553032_at   | IL31RA      | 0.9586405     | 0.550502435 |                |                 |                 |
| 1555431_a_at | IL31RA      | 0.559295667   | 0.550502435 |                |                 |                 |
| 243541_at    | IL31RA      | 1.04411       | 0           |                |                 |                 |
| 205945_at    | IL6R        | 0.734516      | 0.550502435 |                |                 |                 |
| 205798_at    | IL7R        | -0.641750667  | 1.810509752 |                |                 |                 |
| 211506_s_at  | IL8         | -0.533047333  | 0.796301331 | IL8            |                 |                 |
| 214493_s_at  | INADL       | 0.9581035     | 0.230227638 |                |                 |                 |
| 205070_at    | ING3        | 0.549569833   | 1.810509752 | ING3           |                 |                 |
| 228287_at    | ING5        | 1.1775015     | 0           |                | ING5            | ING5            |
| 204926_at    | INHBA       | 0.691301667   | 1.123589586 |                |                 |                 |
| 210511_s_at  | INHBA       | 0.543061667   | 1.123589586 |                |                 |                 |
| 210587_at    | INHBE       | 1.5613865     | 1.455154512 |                |                 |                 |
| 231152_at    | INO80D      | 0.660243833   | 1.810509752 |                |                 |                 |
| 204552_at    | INPP4A      | 0.888526833   | 0.230227638 |                |                 |                 |
| 204553_x_at  | INPP4A      | 0.810150167   | 0.137080273 |                |                 |                 |
| 208363_s_at  | INPP4A      | 0.672058      | 0.550502435 |                |                 |                 |

| Probe Set ID | Gene Symbol | miR-128-miRNC | q value (%) | miR-128 tgts_M | miR-128 tgts_TS | miR-128 tgts_PT |
|--------------|-------------|---------------|-------------|----------------|-----------------|-----------------|
| 203504 s at  | ABCA1       | -1.2890325    | 0           | ABCA1          | ABCA1           | ABCA1           |
| 237056 at    | INSC        | 1.547815333   | 0.393887585 |                |                 |                 |
| 201626 at    | INSIG1      | 0.530025333   | 3.029425085 |                |                 |                 |
| 1553670 at   | INTS4       | 0.600876833   | 2.499099453 |                |                 |                 |
| 225169 at    | INTS4       | 0.572596333   | 1.123589586 |                |                 |                 |
| 222250 s at  | INTS7       | 0.625879167   | 2.499099453 |                |                 |                 |
| 221185 s at  | IQCG        | 1.069745      | 0           |                |                 |                 |
| 1569061 at   | IQGAP3      | -1.1421335    | 0           | IQGAP3         |                 |                 |
| 1569062 s at | IQGAP3      | -0.939022667  | 0.550502435 | IQGAP3         |                 |                 |
| 229538 s at  | IQGAP3      | -0.592498833  | 0.393887585 | IQGAP3         |                 |                 |
| 241939 at    | IQGAP3      | -1.179525     | 0.796301331 | IQGAP3         |                 |                 |
| 238599 at    | IRAK1BP1    | 0.6510935     | 3.701646186 | IRAK1BP1       |                 |                 |
| 231779 at    | IRAK2       | 1.8337835     | 0           |                |                 |                 |
| 203275 at    | IRF2        | 0.512943333   | 0.796301331 |                |                 |                 |
| 203882 at    | IRF9        | 0.638458      | 1.455154512 |                |                 |                 |
| 1555833 a at | IRGQ        | 1.045915167   | 1.123589586 |                |                 |                 |
| 239177 at    | IRGQ        | 1.2818645     | 0.796301331 |                |                 |                 |
| 64488 at     | IRGQ        | 1.068586667   | 1.123589586 |                |                 |                 |
| 208114 s at  | ISG20L2     | 0.992689667   | 0.796301331 |                |                 |                 |
| 205032 at    | ITGA2       | 0.999658333   | 0           |                | ITGA2           |                 |
| 227314 at    | ITGA2       | 0.880578167   | 1.810509752 |                | ITGA2           |                 |
| 204626 s at  | ITGB3       | 1.445504      | 0           |                |                 |                 |
| 204627 s at  | ITGB3       | 1.453644333   | 0           |                |                 |                 |
| 204628 s at  | ITGB3       | 1.3837095     | 0           |                |                 |                 |
| 216261 at    | ITGB3       | 1.250216333   | 0.550502435 |                |                 |                 |
| 205176 s at  | ITGB3BP     | -0.546495833  | 0.393887585 |                |                 |                 |
| 201124 at    | ITGB5       | -0.681106833  | 0.137080273 |                |                 |                 |
| 205816 at    | ITGB8       | -2.003437167  | 1.810509752 |                |                 |                 |
| 211323 s at  | ITPR1       | 1.063213333   | 0           | ITPR1          |                 |                 |
| 216944 s at  | ITPR1       | 0.679302833   | 1.123589586 | ITPR1          |                 |                 |
| 1568619 s at | ITPRIPL2    | 0.662723      | 3.029425085 | ITPRIPL2       |                 |                 |
| 240941 at    | ITSN2       | 1.276366333   | 0           | ITSN2          | ITSN2           | ITSN2           |
| 201362 at    | IVNS1ABP    | 1.316976833   | 0           | IVNS1ABP       |                 |                 |
| 201363 s at  | IVNS1ABP    | 1.350155667   | 0           | IVNS1ABP       |                 |                 |
| 206245 s at  | IVNS1ABP    | 0.721803333   | 0.05396551  | IVNS1ABP       |                 |                 |
| 244235 at    | IVNS1ABP    | 0.825426667   | 2.499099453 | IVNS1ABP       |                 |                 |
| 209099 x at  | JAG1        | 1.089264833   | 3.029425085 | JAG1           | JAG1            |                 |
| 216268 s at  | JAG1        | 1.137125333   | 0           | JAG1           | JAG1            |                 |
| 219213 at    | JAM2        | 1.289621333   | 0           |                |                 |                 |
| 203298 s at  | JARID2      | 0.796438333   | 1.123589586 |                |                 |                 |
| 1553533 at   | JPH1        | 1.023479833   | 0           |                |                 |                 |
| 1553764 a at | JUB         | -0.813552     | 0.05396551  |                |                 |                 |
| 225806 at    | JUB         | -0.699696167  | 1.455154512 |                |                 |                 |
| 213005 s at  | KANK1       | 1.069328667   | 0.550502435 |                |                 |                 |
| 228777 at    | KBTD3       | 0.522391167   | 3.701646186 |                |                 |                 |
| 222471 s at  | KCMF1       | 0.521457      | 3.029425085 |                | KCMF1           |                 |
| 208213 s at  | KCNAB1      | -0.872734167  | 0.137080273 | KCNAB1         | KCNAB1          | KCNAB1          |
| 210078 s at  | KCNAB1      | -0.630348333  | 3.029425085 | KCNAB1         | KCNAB1          | KCNAB1          |
| 210079 x at  | KCNAB1      | -0.991321     | 0.137080273 | KCNAB1         | KCNAB1          | KCNAB1          |
| 210471 s at  | KCNAB1      | -0.84353      | 0.230227638 | KCNAB1         | KCNAB1          | KCNAB1          |
| 205952 at    | KCNK3       | 0.925994      | 0.550502435 |                |                 |                 |

| Probe Set ID | Gene Symbol                      | miR-128-miRNC | q value (%) | miR-128 tgts_M | miR-128 tgts_TS | miR-128 tgts_PT |
|--------------|----------------------------------|---------------|-------------|----------------|-----------------|-----------------|
| 203504_s_at  | ABCA1                            | -1.2890325    | 0           | ABCA1          | ABCA1           | ABCA1           |
| 223658_at    | KCNK6                            | 1.601120167   | 0.05396551  | KCNK6          |                 |                 |
| 243435_at    | KCNQ1OT1                         | -0.789268667  | 1.123589586 |                |                 |                 |
| 223891_at    | KCNQ5                            | 1.0421145     | 0.05396551  |                |                 |                 |
| 244623_at    | KCNQ5                            | 1.017806667   | 1.810509752 |                |                 |                 |
| 239098_at    | KCNRG                            | -0.989589     | 0.230227638 |                |                 |                 |
| 240288_at    | KCNRG                            | -0.717764     | 0.230227638 |                |                 |                 |
| 205968_at    | KCNS3                            | 0.7775285     | 3.701646186 |                |                 |                 |
| 223208_at    | KCTD10                           | -0.566851667  | 3.029425085 |                |                 |                 |
| 226518_at    | KCTD10                           | -0.698086667  | 0.137080273 |                |                 |                 |
| 212192_at    | KCTD12                           | 1.054693333   | 0.393887585 |                |                 |                 |
| 219545_at    | KCTD14                           | 0.8678185     | 0           |                |                 |                 |
| 58916_at     | KCTD14                           | 0.802103833   | 0.230227638 |                |                 |                 |
| 222664_at    | KCTD15                           | 0.540151333   | 1.455154512 |                |                 |                 |
| 222668_at    | KCTD15                           | 0.609326667   | 1.123589586 |                |                 |                 |
| 229873_at    | KCTD21                           | 0.915927833   | 0.230227638 |                |                 |                 |
| 238001_at    | KCTD6                            | 0.511388333   | 3.701646186 |                |                 |                 |
| 208988_at    | KDM2A                            | 0.798761667   | 1.455154512 | KDM2A          |                 |                 |
| 208989_s_at  | KDM2A                            | 0.5916935     | 0.796301331 | KDM2A          |                 |                 |
| 201549_x_at  | KDM5B                            | 0.528897667   | 1.123589586 |                |                 |                 |
| 203144_s_at  | KIAA0040                         | 3.026345167   | 2.499099453 |                |                 |                 |
| 238659_at    | KIAA0141                         | 0.752939167   | 3.029425085 |                |                 |                 |
| 212057_at    | KIAA0182                         | 0.811820333   | 1.455154512 |                |                 |                 |
| 1560138_at   | KIAA0226                         | 0.782699      | 0.137080273 |                |                 |                 |
| 213208_at    | KIAA0240                         | 0.666228333   | 1.455154512 |                |                 |                 |
| 38892_at     | KIAA0240                         | 0.887378833   | 2.499099453 |                |                 |                 |
| 222468_at    | KIAA0319L                        | -0.6328275    | 0.393887585 |                |                 |                 |
| 212355_at    | KIAA0323                         | 0.810006667   | 0.137080273 |                |                 |                 |
| 212356_at    | KIAA0323                         | 0.767367      | 0.796301331 |                |                 |                 |
| 212427_at    | KIAA0368                         | -0.589078833  | 1.123589586 |                |                 |                 |
| 37232_at     | KIAA0586                         | -0.574714833  | 3.701646186 |                |                 |                 |
| 203955_at    | KIAA0649                         | 0.614826      | 3.029425085 |                |                 |                 |
| 212311_at    | KIAA0746                         | 1.246710167   | 0.05396551  |                |                 |                 |
| 212314_at    | KIAA0746                         | 0.9922805     | 0.550502435 |                |                 |                 |
| 230232_at    | KIAA0746                         | 1.302487667   | 0.230227638 |                |                 |                 |
| 215268_at    | KIAA0754                         | -0.780388333  | 3.029425085 | KIAA0754       |                 |                 |
| 215081_at    | KIAA1024                         | 1.191755667   | 3.029425085 |                |                 |                 |
| 223161_at    | KIAA1147                         | 0.914650667   | 0.137080273 |                |                 |                 |
| 223162_s_at  | KIAA1147                         | 0.867486667   | 0.230227638 |                |                 |                 |
| 231856_at    | KIAA1244                         | 1.232423833   | 0.393887585 |                |                 |                 |
| 243589_at    | KIAA1267 ///<br>LOC1002943<br>37 | -0.767028333  | 0.796301331 |                |                 |                 |
| 235301_at    | KIAA1324L                        | 0.629044167   | 0.550502435 |                |                 |                 |
| 226222_at    | KIAA1432                         | -0.598940333  | 1.123589586 | KIAA1432       |                 |                 |
| 213232_at    | KIAA1467                         | 0.813852      | 0.393887585 | KIAA1467       |                 |                 |
| 213234_at    | KIAA1467                         | 1.226027833   | 0           | KIAA1467       |                 |                 |
| 223575_at    | KIAA1549                         | 0.604099333   | 0.550502435 |                | KIAA1549        |                 |
| 236078_at    | KIAA1609                         | -0.706302667  | 0.796301331 |                |                 |                 |
| 231956_at    | KIAA1618                         | 0.641956667   | 1.455154512 |                |                 |                 |
| 232031_s_at  | KIAA1632                         | 0.548669833   | 2.499099453 |                |                 |                 |

| Probe Set ID | Gene Symbol   | miR-128-miRNC | q value (%) | miR-128 tgts_M | miR-128 tgts_TS | miR-128 tgts_PT |
|--------------|---------------|---------------|-------------|----------------|-----------------|-----------------|
| 203504 s at  | ABCA1         | -1.2890325    | 0           | ABCA1          | ABCA1           | ABCA1           |
| 236108 at    | KIAA1632      | 0.523479833   | 1.810509752 |                |                 |                 |
| 1559601 at   | KIAA2018      | 0.536509667   | 3.029425085 |                | KIAA218         |                 |
| 204444 at    | KIF11         | -0.718696667  | 0.393887585 | KIF11          |                 |                 |
| 202962 at    | KIF13B        | 0.820710833   | 0.05396551  | KIF13B         |                 |                 |
| 206364 at    | KIF14         | -0.625691667  | 1.810509752 |                |                 |                 |
| 236641 at    | KIF14         | -0.682301     | 0.550502435 |                |                 |                 |
| 219306 at    | KIF15         | -1.210071     | 0           |                |                 |                 |
| 221258 s at  | KIF18A        | -0.651346667  | 0.393887585 |                |                 |                 |
| 225878 at    | KIF1B         | 0.855027333   | 0.796301331 | KIF1B          |                 |                 |
| 205235 s at  | KIF20B        | -0.684363333  | 3.029425085 |                |                 |                 |
| 204411 at    | KIF21B        | 1.347847167   | 1.455154512 | KIF21B         |                 |                 |
| 232514 at    | KIF27         | 0.881132833   | 1.810509752 |                |                 |                 |
| 209408 at    | KIF2C         | -0.795688167  | 0.796301331 |                |                 |                 |
| 203130 s at  | KIF5C         | 1.796927333   | 0           |                |                 |                 |
| 209680 s at  | KIFC1         | -0.5993035    | 3.701646186 |                |                 |                 |
| 205664 at    | KIN           | 0.5610595     | 1.123589586 |                |                 |                 |
| 208467 at    | KLF12         | 0.513375333   | 0.550502435 |                |                 |                 |
| 227261 at    | KLF12         | 0.898437833   | 1.810509752 |                |                 |                 |
| 220266 s at  | KLF4          | -0.508877     | 3.029425085 | KLF4           | KLF4            | KLF4            |
| 1555832 s at | KLF6          | -0.554831667  | 1.123589586 |                |                 |                 |
| 225732 at    | KLHDC5        | 1.004066667   | 0.550502435 |                |                 |                 |
| 225961 at    | KLHDC5        | 0.51015       | 3.701646186 |                |                 |                 |
| 226370 at    | KLHL15        | 0.931311      | 1.455154512 |                |                 |                 |
| 212882 at    | KLHL18        | 0.822605333   | 0.393887585 | KLHL18         | KLHL18          |                 |
| 221986 s at  | KLHL24        | 0.547898333   | 0.393887585 |                |                 |                 |
| 226158 at    | KLHL24        | 0.9672205     | 0.393887585 |                |                 |                 |
| 242088 at    | KLHL24        | 0.790345      | 1.455154512 |                |                 |                 |
| 228328 at    | KLHL28        | 1.036437833   | 2.499099453 | KLHL28         |                 |                 |
| 235727 at    | KLHL28        | 1.141157667   | 0           | KLHL28         |                 |                 |
| 220239 at    | KLHL7         | -0.742998833  | 0.550502435 | KLHL7          |                 |                 |
| 242648 at    | KLHL8         | 0.893806333   | 1.123589586 |                |                 |                 |
| 206316 s at  | KNTC1         | -0.613475     | 1.455154512 |                |                 |                 |
| 202057 at    | KPNA1         | 0.659684833   | 3.029425085 |                |                 |                 |
| 221502 at    | KPNA3         | -0.643513333  | 1.455154512 |                |                 | KPNA3           |
| 233122 at    | KRTCAP2       | 1.354392333   | 0           |                |                 |                 |
| 202202 s at  | LAMA4         | 1.073173833   | 0.05396551  |                |                 |                 |
| 210990 s at  | LAMA4         | 0.582372333   | 3.701646186 |                |                 |                 |
| 209270 at    | LAMB3         | 0.528495      | 1.810509752 |                |                 |                 |
| 202267 at    | LAMC2         | 1.267939333   | 0           | LAMC2          |                 |                 |
| 207517 at    | LAMC2         | 0.660938333   | 1.123589586 | LAMC2          |                 |                 |
| 217933 s at  | LAP3          | 0.564282333   | 1.123589586 | LAP3           |                 |                 |
| 1554679 a at | LAPTM4B       | -0.826705     | 0.137080273 | LAPTM4B        |                 |                 |
| 208029 s at  | LAPTM4B       | -0.52547      | 0.550502435 | LAPTM4B        |                 |                 |
| 208767 s at  | LAPTM4B       | -0.688905     | 0           | LAPTM4B        |                 |                 |
| 1555384 a at | LARP4         | 0.8042        | 0.230227638 |                | LARP4           |                 |
| 238959 at    | LARP4         | 0.561381667   | 1.123589586 |                | LARP4           |                 |
| 238960 s at  | LARP4         | 0.631667333   | 1.455154512 |                | LARP4           |                 |
| 242019 at    | LASS6         | 0.521409667   | 3.029425085 |                |                 |                 |
| 211005_at    | LAT /// SPNS1 | 1.023411833   | 3.701646186 |                |                 |                 |

| Probe Set ID | Gene Symbol                          | miR-128-miRNC | q value (%) | miR-128 tgts_M | miR-128 tgts_TS | miR-128 tgts_PT |
|--------------|--------------------------------------|---------------|-------------|----------------|-----------------|-----------------|
| 203504_s_at  | ABCA1                                | -1.2890325    | 0           | ABCA1          | ABCA1           | ABCA1           |
| 221581_s_at  | LAT2                                 | 1.604362667   | 0           |                |                 |                 |
| 1570425_s_at | LATS1                                | 0.638568      | 0.393887585 |                |                 |                 |
| 1556886_a_at | LAYN                                 | 0.888875333   | 1.455154512 |                |                 |                 |
| 232293_at    | LCORL                                | -0.596288     | 3.029425085 |                |                 |                 |
| 208885_at    | LCP1                                 | 1.8591485     | 0           |                |                 |                 |
| 202068_s_at  | LDLR                                 | -0.573075167  | 1.123589586 | LDLR           | LDLR            |                 |
| 211354_s_at  | LEPR                                 | 0.744019167   | 1.123589586 |                |                 |                 |
| 211355_x_at  | LEPR                                 | 0.694816      | 1.455154512 |                |                 |                 |
| 211356_x_at  | LEPR                                 | 0.713678667   | 1.455154512 |                |                 |                 |
| 202594_at    | LEPROTL1                             | 0.593432333   | 0.550502435 |                |                 |                 |
| 202595_s_at  | LEPROTL1                             | 0.627747      | 0.137080273 |                |                 |                 |
| 210393_at    | LGR5                                 | -1.198870667  | 0.796301331 |                |                 |                 |
| 231976_at    | LINS1                                | 0.525709      | 3.701646186 |                |                 |                 |
| 225793_at    | LIX1L                                | 0.522621667   | 1.123589586 |                |                 |                 |
| 235036_at    | LIX1L                                | 0.916808667   | 0.05396551  |                |                 |                 |
| 244881_at    | LMLN                                 | 0.519900667   | 1.455154512 |                |                 |                 |
| 203411_s_at  | LMNA                                 | -0.594091     | 2.499099453 |                |                 |                 |
| 203276_at    | LMNB1                                | -0.869214333  | 0           | LMNB1          |                 |                 |
| 216952_s_at  | LMNB2                                | -0.971531667  | 1.123589586 |                |                 |                 |
| 204249_s_at  | LMO2                                 | 0.722241      | 0.796301331 | LMO2           |                 |                 |
| 241922_at    | LMO4                                 | -0.645178667  | 2.499099453 |                |                 |                 |
| 228647_at    | LOC100049716                         | 0.611987833   | 0.550502435 |                |                 |                 |
| 240407_at    | LOC100126784                         | 0.629013      | 1.123589586 |                |                 |                 |
| 244074_at    | LOC100129104                         | 0.677263333   | 2.499099453 |                |                 |                 |
| 244489_at    | LOC100129268                         | 0.6649825     | 1.123589586 |                |                 |                 |
| 224256_at    | LOC100129449                         | -0.902224333  | 0.550502435 |                |                 |                 |
| 1556555_at   | LOC100129461                         | 1.171106333   | 0           |                |                 |                 |
| 239029_at    | LOC100129701                         | 0.5488055     | 2.499099453 |                |                 | LOC100129701    |
| 234757_at    | LOC100129884                         | -0.780134333  | 3.701646186 |                |                 |                 |
| 236560_at    | LOC100129884                         | -0.553480333  | 0.550502435 |                |                 |                 |
| 242255_at    | LOC100130837                         | 0.887758333   | 0           |                |                 |                 |
| 244659_at    | LOC100131015                         | -0.611539833  | 3.029425085 |                |                 |                 |
| 228712_at    | LOC100132369                         | -0.890289667  | 0.796301331 |                |                 |                 |
| 1558527_at   | LOC100132707                         | 0.901028167   | 0           |                |                 |                 |
| 1558046_x_at | LOC100132864 ///<br>LOC100293492 /// | 0.541234333   | 3.701646186 |                |                 |                 |

| Probe Set ID | Gene Symbol                                                       | miR-128-miRNC | q value (%) | miR-128 tgts_M | miR-128 tgts_TS | miR-128 tgts_PT                                                   |
|--------------|-------------------------------------------------------------------|---------------|-------------|----------------|-----------------|-------------------------------------------------------------------|
| 203504_s_at  | ABCA1                                                             | -1.2890325    | 0           | ABCA1          | ABCA1           | ABCA1                                                             |
|              | LOC389906<br>///<br>LOC441528<br>///<br>LOC729162                 |               |             |                |                 |                                                                   |
| 1565666_s_at | LOC1001337<br>61 /// MUC6                                         | -1.8353475    | 0.393887585 |                |                 |                                                                   |
| 1557783_at   | LOC1001339<br>91                                                  | 0.859474167   | 3.029425085 |                |                 |                                                                   |
| 235167_at    | LOC1001909<br>86                                                  | -0.854171667  | 0.550502435 |                |                 |                                                                   |
| 213605_s_at  | LOC1002722<br>16 ///<br>LOC1002921<br>01                          | -0.6309315    | 0.550502435 |                |                 |                                                                   |
| 1569315_s_at | LOC1002722<br>28                                                  | 1.480399667   | 0           | LOC100272228   |                 |                                                                   |
| 228231_at    | LOC1002870<br>81                                                  | 0.759667333   | 0.550502435 |                |                 |                                                                   |
| 217480_x_at  | LOC1002877<br>23 ///<br>LOC642424<br>///<br>LOC642838             | -1.758837167  | 0           |                |                 |                                                                   |
| 244766_at    | LOC1002887<br>04 ///<br>LOC595101<br>///<br>LOC641298<br>/// SMG1 | -0.622438167  | 3.701646186 |                |                 | LOC1002887<br>04 ///<br>LOC595101<br>///<br>LOC641298<br>/// SMG1 |
| 230746_s_at  | LOC1002889<br>85                                                  | 1.599512833   | 0           |                |                 |                                                                   |
| 227287_at    | LOC1002909<br>73                                                  | -1.382144833  | 0           |                |                 |                                                                   |
| 227136_s_at  | LOC1002920<br>24                                                  | 0.939219      | 0.393887585 |                |                 |                                                                   |
| 221202_at    | LOC1002938<br>71                                                  | 0.876872333   | 1.123589586 |                |                 |                                                                   |
| 1558256_at   | LOC148189                                                         | 0.873184833   | 0.230227638 |                |                 |                                                                   |
| 232281_at    | LOC148189                                                         | 0.8092765     | 2.499099453 |                |                 |                                                                   |
| 1559433_at   | LOC149773                                                         | 1.311203      | 0.393887585 |                |                 |                                                                   |
| 225657_at    | LOC152217                                                         | -0.657092     | 1.810509752 |                |                 |                                                                   |
| 1562048_at   | LOC152225                                                         | 0.885700667   | 0           |                |                 |                                                                   |
| 232645_at    | LOC153684                                                         | 0.971307833   | 3.701646186 |                |                 |                                                                   |
| 1559129_a_at | LOC158257                                                         | 0.773181333   | 1.455154512 |                |                 |                                                                   |
| 232034_at    | LOC203274                                                         | 0.524926167   | 1.810509752 |                |                 |                                                                   |
| 1564651_at   | LOC221710                                                         | 0.770695833   | 0.550502435 |                |                 |                                                                   |
| 227124_at    | LOC221710                                                         | 0.677479      | 1.455154512 |                |                 |                                                                   |
| 235707_at    | LOC221710                                                         | 0.579384833   | 1.455154512 |                |                 |                                                                   |
| 1557131_at   | LOC254100                                                         | 1.517744333   | 1.455154512 |                |                 |                                                                   |
| 226793_at    | LOC283267                                                         | 0.678483333   | 0.393887585 |                |                 |                                                                   |



| Probe Set ID | Gene Symbol                                                          | miR-128-miRNC | q value (%) | miR-128 tgts_M | miR-128 tgts_TS | miR-128 tgts_PT |
|--------------|----------------------------------------------------------------------|---------------|-------------|----------------|-----------------|-----------------|
| 203504_s_at  | ABCA1                                                                | -1.2890325    | 0           | ABCA1          | ABCA1           | ABCA1           |
| 229528_at    | LOC283378                                                            | 0.709730833   | 0.796301331 |                |                 |                 |
| 233737_s_at  | LOC284561                                                            | 0.6370095     | 0.230227638 |                |                 |                 |
| 236321_at    | LOC285550                                                            | -0.739969     | 1.455154512 |                |                 |                 |
| 232504_at    | LOC285628                                                            | 1.781827833   | 0           |                |                 |                 |
| 222196_at    | LOC286434                                                            | 1.074320833   | 0           |                |                 |                 |
| 239762_at    | LOC286437                                                            | 0.814957333   | 0           |                |                 |                 |
| 228160_at    | LOC339290                                                            | -0.624622833  | 1.123589586 |                |                 |                 |
| 1563589_at   | LOC340184                                                            | 1.440981      | 0           |                |                 |                 |
| 235606_at    | LOC344595                                                            | 0.6998985     | 0.550502435 |                |                 |                 |
| 1558982_at   | LOC375010                                                            | -0.575771333  | 2.499099453 |                |                 |                 |
| 220602_s_at  | LOC388152<br>///<br>LOC727751<br>///<br>LOC727849<br>///<br>LOC80154 | 0.7139085     | 1.123589586 |                |                 |                 |
| 1560841_at   | LOC389247                                                            | 0.731755      | 3.029425085 |                |                 |                 |
| 230815_at    | LOC389765                                                            | 0.669755667   | 3.701646186 | LOC389765      |                 |                 |
| 213556_at    | LOC390940                                                            | 1.264860167   | 0           | LOC390940      |                 |                 |
| 235482_at    | LOC400960                                                            | 0.6105405     | 1.455154512 |                |                 |                 |
| 228601_at    | LOC401022                                                            | 0.568965333   | 3.029425085 |                |                 |                 |
| 239182_at    | LOC401022                                                            | 0.626813833   | 1.123589586 |                |                 |                 |
| 242042_s_at  | LOC401022                                                            | 0.518068333   | 2.499099453 |                |                 |                 |
| 1570243_at   | LOC440731                                                            | 1.495253      | 0           |                |                 |                 |
| 1556404_a_at | LOC441208                                                            | 0.743135667   | 3.029425085 |                |                 |                 |
| 1559957_a_at | LOC642852                                                            | 0.751563167   | 1.123589586 |                |                 |                 |
| 243656_at    | LOC642852                                                            | 0.664590833   | 0.550502435 |                |                 |                 |
| 226404_at    | LOC643167<br>///<br>RBM39                                            | 0.8556        | 0.393887585 |                |                 |                 |
| 1557765_at   | LOC643401                                                            | -0.599228333  | 3.701646186 |                |                 |                 |
| 244105_at    | LOC644231<br>///<br>WHAMML1<br>///<br>WHAMML2                        | 0.959869667   | 0.230227638 |                |                 |                 |
| 227976_at    | LOC644538                                                            | -1.240517833  | 0.230227638 | LOC644538      |                 |                 |
| 231268_at    | LOC645895<br>///<br>MYBL1                                            | -0.925111667  | 1.123589586 |                |                 |                 |
| 238715_at    | LOC646014                                                            | 0.565741667   | 0.796301331 |                |                 |                 |
| 244268_x_at  | LOC646214                                                            | 0.633651333   | 3.029425085 |                |                 |                 |
| 216902_s_at  | LOC653390<br>///<br>LOC730092<br>///<br>RRN3                         | 0.784669      | 0.05396551  |                |                 |                 |
| 237182_at    | LOC653479                                                            | 1.031766667   | 0.05396551  |                |                 |                 |
| 218641_at    | LOC65998                                                             | 0.658128      | 0.550502435 |                |                 |                 |
| 228596_at    | LOC728377                                                            | 1.646793      | 0.550502435 |                |                 |                 |
| 1558640_a_at | LOC728411                                                            | -0.872264     | 0.137080273 |                |                 |                 |
| 235010_at    | LOC729013                                                            | -0.694166333  | 1.123589586 | LOC729013      |                 |                 |
| 214291_at    | LOC729046<br>///<br>RPL17                                            | 0.538117833   | 1.123589586 |                |                 |                 |

| Probe Set ID | Gene Symbol           | miR-128-miRNC | q value (%) | miR-128 tgts_M | miR-128 tgts_TS | miR-128 tgts_PT |
|--------------|-----------------------|---------------|-------------|----------------|-----------------|-----------------|
| 203504 s at  | ABCA1                 | -1.2890325    | 0           | ABCA1          | ABCA1           | ABCA1           |
| 217544 at    | LOC729806             | 0.883587      | 0.796301331 |                |                 |                 |
| 236692 at    | LOC729839             | 0.560832      | 0.796301331 |                |                 |                 |
| 229978 at    | LOC729993             | -0.701168667  | 0.230227638 |                |                 |                 |
| 216908 x at  | LOC730092             | 0.607679667   | 0.796301331 |                |                 |                 |
| 213248 at    | LOC730101             | -1.106216167  | 1.810509752 |                |                 |                 |
| 212957 s at  | LOC92249              | 0.6584685     | 1.123589586 |                |                 |                 |
| 1569013 s at | LOC96610              | 1.535053167   | 0           |                |                 |                 |
| 226802 s at  | LOC96610              | 1.089342167   | 0           |                |                 |                 |
| 233132 at    | LOC96610              | 1.016399      | 0           |                |                 |                 |
| 228808 s at  | LOXL2                 | -0.8993335    | 1.123589586 | LOXL2          |                 |                 |
| 220816 at    | LPAR3                 | 0.532297167   | 1.810509752 |                |                 |                 |
| 231192 at    | LPAR3                 | 0.679548667   | 0.137080273 |                |                 |                 |
| 231788 at    | LPAR5                 | 0.8128155     | 0           |                |                 |                 |
| 226795 at    | LRCH1                 | 0.753065667   | 0.393887585 |                |                 |                 |
| 235012 at    | LRCH1                 | 0.771179667   | 0.05396551  |                |                 |                 |
| 211596 s at  | LRIG1                 | 0.711855      | 1.455154512 |                |                 |                 |
| 226908 at    | LRIG3                 | 1.128096167   | 1.123589586 |                |                 |                 |
| 34697 at     | LRP6                  | 0.631088167   | 0.230227638 | LRP6           | LRP6            |                 |
| 211615 s at  | LRPPRC                | -0.719891667  | 0           |                |                 |                 |
| 211971 s at  | LRPPRC                | -0.50962      | 1.455154512 |                |                 |                 |
| 230194 at    | LRPPRC                | -1.082053833  | 1.123589586 |                |                 |                 |
| 1553940 a at | LRRC28                | 0.584885833   | 1.455154512 | LRRC28         |                 |                 |
| 227423 at    | LRRC28                | 0.765424667   | 1.123589586 | LRRC28         |                 |                 |
| 236917 at    | LRRC34                | -0.846150667  | 0.393887585 |                |                 |                 |
| 236918 s at  | LRRC34                | -0.744229833  | 0.137080273 |                |                 |                 |
| 224686 x at  | LRRC37A2              | -0.598526667  | 1.810509752 |                |                 |                 |
| 219338 s at  | LRRC49                | 1.008896167   | 0.230227638 |                |                 |                 |
| 201862 s at  | LRRFIP1               | 0.54249       | 1.810509752 | LRRFIP1        |                 |                 |
| 218364 at    | LRRFIP2               | -0.649568333  | 0.796301331 |                |                 |                 |
| 232704 s at  | LRRFIP2               | -1.0139055    | 0           |                |                 |                 |
| 202728 s at  | LTBP1                 | 0.927014167   | 0.550502435 | LTBP1          |                 | LTBP1           |
| 239212 at    | LTV1                  | 2.084952833   | 1.123589586 |                |                 |                 |
| 1557066 at   | LUC7L                 | 1.434673333   | 0           |                |                 |                 |
| 1557067 s at | LUC7L                 | 0.932535667   | 0.393887585 |                |                 |                 |
| 223295 s at  | LUC7L                 | 0.624503833   | 1.123589586 |                |                 |                 |
| 218729 at    | LXN                   | 1.254442667   | 0           |                |                 |                 |
| 206584 at    | LY96                  | 0.509990667   | 1.810509752 |                |                 |                 |
| 226748 at    | LYSMD2                | 0.911459833   | 0           |                |                 |                 |
| 208633 s at  | MACF1                 | -0.604666667  | 1.123589586 |                |                 |                 |
| 208634 s at  | MACF1                 | -0.739048333  | 0.550502435 |                |                 |                 |
| 215222 x at  | MACF1                 | -0.663666667  | 1.123589586 |                |                 |                 |
| 1554768 a at | MAD2L1                | -0.752199333  | 0.550502435 |                |                 |                 |
| 203362 s at  | MAD2L1                | -0.802265333  | 0.230227638 |                |                 |                 |
| 223234 at    | MAD2L2                | -1.233333333  | 1.810509752 |                |                 |                 |
| 36711 at     | MAFF                  | 0.7751855     | 0.137080273 |                |                 |                 |
| 223313_s_at  | MAGED4 ///<br>MAGED4B | 0.645225833   | 0.550502435 |                |                 |                 |
| 221553 at    | MAGT1                 | 0.727702333   | 0.230227638 |                |                 |                 |
| 202360 at    | MAML1                 | 0.7124435     | 3.029425085 |                |                 |                 |
| 205088 at    | MAMLD1                | 0.511758833   | 3.701646186 |                |                 |                 |

| Probe Set ID | Gene Symbol | miR-128-miRNC | q value (%) | miR-128 tgts_M | miR-128 tgts_TS | miR-128 tgts_PT |
|--------------|-------------|---------------|-------------|----------------|-----------------|-----------------|
| 203504_s_at  | ABCA1       | -1.2890325    | 0           | ABCA1          | ABCA1           | ABCA1           |
| 1554193_s_at | MANEA       | 0.50326       | 1.810509752 |                |                 |                 |
| 1555227_a_at | MANEA       | 0.616059833   | 2.499099453 |                |                 |                 |
| 208786_s_at  | MAP1LC3B    | -0.503882667  | 1.810509752 |                |                 |                 |
| 202670_at    | MAP2K1      | 0.561605      | 1.810509752 |                |                 |                 |
| 205447_s_at  | MAP3K12     | 0.713811333   | 0           | MAP3K12        |                 |                 |
| 206249_at    | MAP3K13     | 1.0333965     | 0           |                |                 |                 |
| 205192_at    | MAP3K14     | 0.576311167   | 0.393887585 |                |                 |                 |
| 242581_at    | MAP3K15     | 0.939607167   | 3.029425085 |                |                 |                 |
| 221695_s_at  | MAP3K2      | 0.649919667   | 0.796301331 |                |                 |                 |
| 226979_at    | MAP3K2      | 0.50373       | 2.499099453 |                |                 |                 |
| 220145_at    | MAP9        | 0.997477833   | 0.05396551  |                |                 |                 |
| 235550_at    | MAP9        | 1.2320035     | 0.05396551  |                |                 |                 |
| 210449_x_at  | MAPK14      | -0.754121167  | 1.455154512 | MAPK14         | MAPK14          | MAPK14          |
| 211561_x_at  | MAPK14      | -0.868872667  | 1.123589586 | MAPK14         | MAPK14          | MAPK14          |
| 210477_x_at  | MAPK8       | 0.5589225     | 1.810509752 |                |                 |                 |
| 226048_at    | MAPK8       | 0.598381667   | 1.123589586 |                |                 |                 |
| 1558839_at   | MAPKBP1     | 0.622381667   | 1.123589586 |                |                 |                 |
| 202501_at    | MAPRE2      | 0.600953833   | 1.123589586 | MAPRE2         |                 |                 |
| 201737_s_at  | MARCH6      | 0.774751      | 0.393887585 |                |                 |                 |
| 201669_s_at  | MARCKS      | -0.545816667  | 2.499099453 | MARCKS         | MARCKS          | MARCKS          |
| 201670_s_at  | MARCKS      | -0.55758      | 0.550502435 | MARCKS         | MARCKS          | MARCKS          |
| 213002_at    | MARCKS      | -0.50317      | 1.123589586 | MARCKS         | MARCKS          | MARCKS          |
| 225897_at    | MARCKS      | -0.7906045    | 0.137080273 | MARCKS         | MARCKS          | MARCKS          |
| 200644_at    | MARCKSL1    | -0.9142705    | 1.123589586 | MARCKSL1       |                 |                 |
| 211082_x_at  | MARK2       | 0.7959945     | 1.123589586 |                |                 |                 |
| 243529_at    | MARS2       | 0.905253333   | 0           |                |                 |                 |
| 242260_at    | MATR3       | -0.628643167  | 3.701646186 |                |                 |                 |
| 209332_s_at  | MAX         | 0.941614667   | 1.123589586 |                |                 |                 |
| 212064_x_at  | MAZ         | 0.855252333   | 2.499099453 |                |                 |                 |
| 228798_x_at  | MAZ         | 0.7372105     | 3.701646186 |                |                 |                 |
| 241813_at    | MBD1        | -0.731215333  | 3.029425085 | MBD1           |                 |                 |
| 1558111_at   | MBNL1       | -0.935592333  | 0.137080273 |                |                 |                 |
| 235879_at    | MBNL1       | -0.779248     | 1.455154512 |                |                 |                 |
| 226726_at    | MBOAT2      | 0.506816833   | 0.796301331 |                |                 |                 |
| 228938_at    | MBP         | 0.756946833   | 1.810509752 |                |                 |                 |
| 232092_at    | MCART1      | 0.51176       | 0.550502435 |                |                 |                 |
| 226238_at    | MCEE        | 0.509265333   | 1.810509752 |                |                 |                 |
| 220459_at    | MCM3APAS    | 0.665529333   | 2.499099453 |                |                 |                 |
| 222036_s_at  | MCM4        | -0.765275667  | 2.499099453 | MCM4           |                 |                 |
| 222037_at    | MCM4        | -1.0137155    | 3.029425085 | MCM4           |                 |                 |
| 1555465_at   | MCOLN2      | 0.943278167   | 0           |                |                 |                 |
| 217542_at    | MDM2        | -0.545884     | 0.137080273 |                |                 |                 |
| 236814_at    | MDM4        | 0.962945      | 0.550502435 | MDM4           |                 |                 |
| 1555300_a_at | MED12L      | 0.6915675     | 3.701646186 |                |                 |                 |
| 215167_at    | MED14       | 1.107279833   | 0           | MED14          | MED14           | MED14           |
| 209363_s_at  | MED21       | 0.662185      | 0.550502435 |                |                 |                 |
| 242707_at    | MED23       | 1.193036667   | 0.796301331 |                |                 |                 |
| 1553993_s_at | MED25       | -1.052325167  | 3.701646186 |                |                 |                 |
| 222635_s_at  | MED28       | 0.554587667   | 3.701646186 | MED28          |                 |                 |
| 219318_x_at  | MED31       | 0.596330667   | 2.499099453 | MED31          |                 |                 |

| Probe Set ID | Gene Symbol            | miR-128-miRNC | q value (%) | miR-128 tgts_M | miR-128 tgts_TS | miR-128 tgts_PT |
|--------------|------------------------|---------------|-------------|----------------|-----------------|-----------------|
| 203504_s_at  | ABCA1                  | -1.2890325    | 0           | ABCA1          | ABCA1           | ABCA1           |
| 236241_at    | MED31                  | 0.767021333   | 1.810509752 | MED31          |                 |                 |
| 235473_at    | MED6                   | 0.559603      | 1.455154512 |                |                 |                 |
| 212830_at    | MEGF9                  | -0.858859833  | 0.137080273 |                |                 |                 |
| 212831_at    | MEGF9                  | -0.954309833  | 0.796301331 |                |                 |                 |
| 204825_at    | MELK                   | -0.585120833  | 1.123589586 |                |                 |                 |
| 225955_at    | METRNL                 | -0.609260833  | 2.499099453 |                |                 |                 |
| 226634_at    | METTL10                | -0.539267333  | 0.393887585 |                |                 |                 |
| 221079_s_at  | METTL2A ///<br>METTL2B | 0.624188333   | 0.137080273 |                |                 |                 |
| 232533_at    | METTL8                 | -0.607281167  | 0.230227638 |                |                 |                 |
| 1552312_a_at | MFAP3                  | 1.056962333   | 0           |                |                 |                 |
| 213123_at    | MFAP3                  | 1.031475333   | 0           |                |                 |                 |
| 214588_s_at  | MFAP3                  | 1.372485      | 0           |                |                 |                 |
| 225478_at    | MFHAS1                 | 1.3060895     | 0           |                | MFHAS1          |                 |
| 219858_s_at  | MFSD6                  | 1.021952667   | 0           |                |                 |                 |
| 213393_at    | MFSD9                  | 0.953543333   | 1.123589586 |                |                 |                 |
| 213403_at    | MFSD9                  | 1.7375555     | 0           |                |                 |                 |
| 231283_at    | MGAT4A                 | 1.422752333   | 3.701646186 | MGAT4A         |                 |                 |
| 228235_at    | MGC16121               | -0.98527      | 0           |                |                 |                 |
| 1558166_at   | MGC16275               | -0.796555833  | 1.810509752 |                |                 |                 |
| 1555874_x_at | MGC21881               | -0.618591     | 1.455154512 | MGC21881       |                 |                 |
| 211718_at    | MGC2889                | 1.0551995     | 1.123589586 | MGC2889        |                 |                 |
| 239104_at    | MGC42157               | 0.683851      | 3.701646186 |                |                 |                 |
| 1568987_at   | MGC57346               | 0.797478      | 1.810509752 |                |                 |                 |
| 214972_at    | MGEA5                  | 0.6873155     | 0           | MGEA5          |                 |                 |
| 225102_at    | MGLL                   | -0.591045     | 2.499099453 |                |                 |                 |
| 224918_x_at  | MGST1                  | -0.758323333  | 0.137080273 |                |                 |                 |
| 231736_x_at  | MGST1                  | -0.636346667  | 0.137080273 |                |                 |                 |
| 205905_s_at  | MICA ///<br>MICB       | 0.943032667   | 0           |                |                 |                 |
| 243611_at    | MICALCL                | 1.270103833   | 3.701646186 |                |                 |                 |
| 206247_at    | MICB                   | 1.4308335     | 0           | MICB           |                 |                 |
| 221862_at    | MIER2                  | -0.851043167  | 0.550502435 | MIER2          | MIER2           |                 |
| 1553336_a_at | MIER3                  | 0.8786385     | 1.123589586 | MIER3          |                 | MIER3           |
| 1554449_at   | MIER3                  | 0.697183833   | 1.455154512 | MIER3          |                 | MIER3           |
| 1554450_s_at | MIER3                  | 0.614944833   | 2.499099453 | MIER3          |                 | MIER3           |
| 217871_s_at  | MIF                    | -0.889451     | 3.701646186 |                |                 |                 |
| 229437_at    | MIR155HG               | -0.5245445    | 1.810509752 |                |                 |                 |
| 224917_at    | MIR21                  | 0.673340333   | 0.393887585 |                |                 |                 |
| 226066_at    | MITF                   | 0.956190667   | 0           |                |                 |                 |
| 212020_s_at  | MKI67                  | -0.932407833  | 0.796301331 |                |                 |                 |
| 212021_s_at  | MKI67                  | -0.750905667  | 2.499099453 |                |                 |                 |
| 212023_s_at  | MKI67                  | -1.192289667  | 0           |                |                 |                 |
| 225526_at    | MKLN1                  | -0.506705333  | 2.499099453 |                |                 |                 |
| 235067_at    | MKLN1                  | -0.528046667  | 3.701646186 |                |                 |                 |
| 209845_at    | MKRN1                  | 1.1002325     | 0.137080273 |                |                 |                 |
| 200616_s_at  | MLEC                   | 0.907346667   | 0.137080273 |                |                 |                 |
| 200617_at    | MLEC                   | 0.894170833   | 0           |                |                 |                 |
| 204783_at    | MLF1                   | 0.945787667   | 1.455154512 |                |                 |                 |
| 218883_s_at  | MLF1IP                 | -0.966314167  | 0.05396551  | MLF1IP         |                 |                 |

| Probe Set ID | Gene Symbol | miR-128-miRNC | q value (%) | miR-128 tgts_M | miR-128 tgts_TS | miR-128 tgts_PT |
|--------------|-------------|---------------|-------------|----------------|-----------------|-----------------|
| 203504 s at  | ABCA1       | -1.2890325    | 0           | ABCA1          | ABCA1           | ABCA1           |
| 238025 at    | MLKL        | 0.807381      | 0           | MLKL           |                 |                 |
| 225992 at    | MLLT10      | -0.506082667  | 0.393887585 | MLLT10         | MLLT1           |                 |
| 218211 s at  | MLPH        | 0.755324833   | 0           |                |                 |                 |
| 202519 at    | MLXIP       | 0.606896833   | 0.230227638 |                |                 |                 |
| 225157 at    | MLXIP       | 0.540753667   | 2.499099453 |                |                 |                 |
| 236347 at    | MMAA        | 0.8724325     | 1.123589586 |                |                 |                 |
| 242702 at    | MMAA        | 1.993090333   | 0.05396551  |                |                 |                 |
| 242750 at    | MMAA        | 1.4953535     | 0           |                |                 |                 |
| 203414 at    | MMD         | 0.8241155     | 0.550502435 | MMD            | MMD             | MMD             |
| 203565 s at  | MNAT1       | 0.6376385     | 2.499099453 |                |                 |                 |
| 214812 s at  | MOBKL1B     | -0.660363333  | 1.123589586 |                |                 |                 |
| 243052 at    | MOBKL2C     | 0.8296145     | 1.810509752 | MOBKL2C        |                 |                 |
| 1557455 s at | MOSPD1      | 0.528037667   | 2.499099453 |                |                 |                 |
| 218853 s at  | MOSPD1      | 0.793055333   | 0.05396551  |                |                 |                 |
| 221895 at    | MOSPD2      | 0.807120833   | 1.123589586 |                |                 |                 |
| 64883 at     | MOSPD2      | 1.144976833   | 0.05396551  |                |                 |                 |
| 213306 at    | MPDZ        | 0.5426975     | 3.701646186 |                |                 |                 |
| 1564308 a at | MPP7        | 0.679773333   | 2.499099453 |                |                 |                 |
| 238451 at    | MPP7        | 1.088982167   | 0           |                |                 |                 |
| 201874 at    | MPZL1       | 0.578051667   | 1.810509752 |                |                 |                 |
| 201875 s at  | MPZL1       | 0.619751      | 0.796301331 |                |                 |                 |
| 207565 s at  | MR1         | 0.779708667   | 1.123589586 |                |                 |                 |
| 210224 at    | MR1         | 0.791324667   | 0           |                |                 |                 |
| 219648 at    | MREG        | 0.649733667   | 1.455154512 |                |                 |                 |
| 203931 s at  | MRPL12      | -1.1405845    | 0.05396551  | MRPL12         |                 |                 |
| 225315 at    | MRPL21      | -0.569325333  | 3.029425085 |                |                 |                 |
| 218339 at    | MRPL22      | -0.535695     | 2.499099453 |                |                 |                 |
| 220103 s at  | MRPS18C     | 0.630821667   | 1.810509752 |                |                 |                 |
| 226256 at    | MRPS22      | 0.636009333   | 2.499099453 |                |                 |                 |
| 238555 at    | MRPS31      | 1.337791333   | 0           |                |                 |                 |
| 217942 at    | MRPS35      | 0.582662      | 1.810509752 |                |                 |                 |
| 220688 s at  | MRTO4       | -0.561032833  | 3.029425085 |                |                 |                 |
| 210947 s at  | MSH3        | 0.743662333   | 0           |                |                 |                 |
| 212708 at    | MSL1        | 0.600170833   | 0.550502435 | MSL1           |                 |                 |
| 208423 s at  | MSR1        | 0.6068275     | 1.123589586 |                |                 |                 |
| 211887 x at  | MSR1        | 0.597667667   | 1.123589586 |                |                 |                 |
| 227150 at    | MTF1        | 0.910264333   | 0           |                |                 |                 |
| 203433 at    | MTHFS       | 0.830528833   | 0           |                |                 |                 |
| 216303 s at  | MTMR1       | 0.923799167   | 0.393887585 |                |                 |                 |
| 1556034 s at | MTMR11      | 1.118861167   | 2.499099453 |                |                 |                 |
| 205076 s at  | MTMR11      | 1.3872635     | 0           |                |                 |                 |
| 204837 at    | MTMR9       | 0.780712      | 0           |                |                 |                 |
| 225215 s at  | MTRF1L      | 0.552893333   | 0.796301331 | MTRF1L         |                 |                 |
| 203036 s at  | MTSS1       | 0.858075      | 0           |                |                 |                 |
| 203037 s at  | MTSS1       | 0.938178333   | 1.455154512 |                |                 |                 |
| 210359 at    | MTSS1       | 0.958435      | 0           |                |                 |                 |
| 210360 s at  | MTSS1       | 0.761740333   | 0.796301331 |                |                 |                 |
| 221290 s at  | MUM1        | 1.243357      | 0.137080273 | MUM1           |                 |                 |
| 206877 at    | MXD1        | 0.744811      | 0.550502435 |                |                 |                 |
| 228846 at    | MXD1        | 1.176394      | 0           |                |                 |                 |

| Probe Set ID | Gene Symbol | miR-128-miRNC | q value (%) | miR-128 tgts_M | miR-128 tgts_TS | miR-128 tgts_PT |
|--------------|-------------|---------------|-------------|----------------|-----------------|-----------------|
| 203504_s_at  | ABCA1       | -1.2890325    | 0           | ABCA1          | ABCA1           | ABCA1           |
| 227326_at    | MXRA7       | 0.650436      | 0.550502435 |                |                 |                 |
| 213906_at    | MYBL1       | -1.020301     | 0           | MYBL1          |                 |                 |
| 212372_at    | MYH10       | -0.638005     | 0.230227638 | MYH10          | MYH1            |                 |
| 213067_at    | MYH10       | -0.792342833  | 0.230227638 | MYH10          | MYH1            |                 |
| 1564072_at   | MYH16       | 0.524295833   | 3.701646186 |                |                 |                 |
| 1563466_at   | MYLK        | -0.640457333  | 0.796301331 |                |                 |                 |
| 224823_at    | MYLK        | -0.521580833  | 2.499099453 |                |                 |                 |
| 1566108_at   | MYNN        | 0.639985333   | 1.810509752 |                |                 |                 |
| 215119_at    | MYO16       | -1.760120333  | 0           |                |                 |                 |
| 219320_at    | MYO19       | 0.761726      | 0           |                |                 |                 |
| 225080_at    | MYO1C       | 0.501136667   | 3.029425085 |                |                 |                 |
| 212338_at    | MYO1D       | 1.059617833   | 0           | MYO1D          |                 |                 |
| 201798_s_at  | MYOF        | -0.515585     | 1.123589586 |                |                 |                 |
| 217518_at    | MYOF        | -1.0839095    | 0           |                |                 |                 |
| 211874_s_at  | MYST4       | 0.5443915     | 2.499099453 |                |                 |                 |
| 235547_at    | N4BP2L2     | 0.58248       | 1.455154512 |                |                 |                 |
| 220311_at    | N6AMT1      | 0.9601815     | 0           |                |                 |                 |
| 228062_at    | NAP1L5      | -0.6363045    | 0.796301331 | NAP1L5         | NAP1L5          |                 |
| 228063_s_at  | NAP1L5      | -0.651773333  | 1.810509752 | NAP1L5         | NAP1L5          |                 |
| 242635_s_at  | NAPEPLD     | 0.934349833   | 0           | NAPEPLD        | NAPEPLD         |                 |
| 219217_at    | NARS2       | 0.771796833   | 0           | NARS2          |                 |                 |
| 242918_at    | NASP        | 0.8095345     | 0.550502435 |                |                 |                 |
| 224772_at    | NAV1        | -0.513992     | 0.550502435 |                |                 |                 |
| 216632_at    | NAV3        | -1.017474667  | 0.796301331 | NAV3           | NAV3            | NAV3            |
| 242191_at    | NBPF10      | 0.7699295     | 0.05396551  |                |                 |                 |
| 1568856_at   | NBR1        | 1.521970667   | 1.455154512 |                |                 |                 |
| 1568857_a_at | NBR1        | 0.989545833   | 0           |                |                 |                 |
| 201383_s_at  | NBR1        | 0.719066667   | 0.393887585 |                |                 |                 |
| 201384_s_at  | NBR1        | 0.52325       | 1.455154512 |                |                 |                 |
| 227394_at    | NCAM1       | 0.506381      | 2.499099453 | NCAM1          | NCAM1           |                 |
| 218662_s_at  | NCAPG       | -0.57513      | 1.123589586 | NCAPG          |                 |                 |
| 219588_s_at  | NCAPG2      | -0.713446333  | 0.230227638 |                |                 |                 |
| 212949_at    | NCAPH       | -0.513554     | 0.393887585 |                |                 |                 |
| 207738_s_at  | NCKAP1      | 0.724320667   | 3.701646186 | NCKAP1         |                 |                 |
| 205731_s_at  | NCOA2       | 0.70948       | 0.05396551  |                |                 |                 |
| 205732_s_at  | NCOA2       | 0.880083333   | 0.796301331 |                |                 |                 |
| 203245_s_at  | NCRNA00094  | 0.634399833   | 1.123589586 |                |                 |                 |
| 220399_at    | NCRNA00115  | 0.681572667   | 1.455154512 |                |                 |                 |
| 1552258_at   | NCRNA00152  | -0.926714667  | 2.499099453 |                |                 |                 |
| 204162_at    | NDC80       | -0.713508333  | 0.230227638 |                |                 |                 |
| 227249_at    | NDE1        | -0.562352833  | 1.123589586 |                |                 |                 |
| 208093_s_at  | NDEL1       | 0.697096833   | 0.137080273 |                |                 |                 |
| 230190_at    | NDFIP2      | 0.506959333   | 2.499099453 |                |                 |                 |
| 200632_s_at  | NDRG1       | 0.764876667   | 0.05396551  |                |                 |                 |
| 224368_s_at  | NDRG3       | 0.596920333   | 1.810509752 |                |                 |                 |
| 209159_s_at  | NDRG4       | 0.661227      | 1.455154512 |                |                 |                 |
| 218563_at    | NDUFA3      | -0.5391445    | 1.455154512 |                |                 |                 |

| Probe Set ID | Gene Symbol | miR-128-miRNC | q value (%) | miR-128 tgts_M | miR-128 tgts_TS | miR-128 tgts_PT |
|--------------|-------------|---------------|-------------|----------------|-----------------|-----------------|
| 203504 s at  | ABCA1       | -1.2890325    | 0           | ABCA1          | ABCA1           | ABCA1           |
| 202001 s at  | NDUFA6      | -0.82388      | 0           |                |                 |                 |
| 227559 at    | NDUF4F4     | 0.686844167   | 1.810509752 |                |                 |                 |
| 223112 s at  | NDUFB10     | -0.7329135    | 2.499099453 |                |                 |                 |
| 203621 at    | NDUFB5      | 0.602721667   | 2.499099453 |                |                 |                 |
| 203606 at    | NDUFS6      | -0.608480833  | 2.499099453 |                |                 |                 |
| 238320 at    | NEAT1       | -1.015751667  | 1.810509752 |                |                 |                 |
| 213012 at    | NEDD4       | 0.730826333   | 1.810509752 |                | NEDD4           | NEDD4           |
| 201840 at    | NEDD8       | -0.654248333  | 2.499099453 |                |                 |                 |
| 202149 at    | NEDD9       | 0.980094      | 1.123589586 |                |                 |                 |
| 202150 s at  | NEDD9       | 0.7111215     | 0           |                |                 |                 |
| 204641 at    | NEK2        | -1.3800265    | 0           | NEK2           | NEK2            | NEK2            |
| 211080 s at  | NEK2        | -0.834346667  | 0.796301331 | NEK2           | NEK2            | NEK2            |
| 223158 s at  | NEK6        | -0.508997833  | 0.796301331 | NEK6           | NEK6            | NEK6            |
| 229877 at    | NEO1        | -0.598510833  | 1.810509752 | NEO1           | NEO1            | NEO1            |
| 218888 s at  | NETO2       | -0.714987667  | 1.810509752 | NETO2          |                 |                 |
| 231801 at    | NFATC2      | -1.1083065    | 0.550502435 | NFATC2         |                 |                 |
| 1567014 s at | NFE2L2      | 0.596223333   | 1.123589586 | NFE2L2         |                 | NFE2L2          |
| 1567015 at   | NFE2L2      | 0.625163333   | 1.123589586 | NFE2L2         |                 | NFE2L2          |
| 213032 at    | NFIB        | -0.542068333  | 0.796301331 |                | NFIB            |                 |
| 213033 s at  | NFIB        | -0.620654833  | 0.05396551  |                | NFIB            |                 |
| 201502 s at  | NFKBIA      | 0.873017667   | 0           |                |                 |                 |
| 204109 s at  | NFYA        | 0.54515       | 2.499099453 |                |                 |                 |
| 228433 at    | NFYA        | 0.759999667   | 1.123589586 |                |                 |                 |
| 217963 s at  | NGFRAP1     | -0.843855     | 0           | NGFRAP1        |                 | NGFRAP1         |
| 1564746 at   | NHEDC2      | 0.679339      | 0.230227638 |                |                 |                 |
| 229491 at    | NHEDC2      | 0.9369325     | 0.796301331 |                |                 |                 |
| 219353 at    | NHLRC2      | -0.608423     | 3.701646186 |                |                 |                 |
| 239314 at    | NHLRC3      | 0.706184667   | 0.796301331 | NHLRC3         |                 |                 |
| 228933 at    | NHS         | 0.685470667   | 0.796301331 | NHS            | NHS             | NHS             |
| 242800 at    | NHS         | 0.659384333   | 1.123589586 | NHS            | NHS             | NHS             |
| 223981 at    | NIN         | 0.605264      | 0.550502435 |                |                 |                 |
| 1552696 at   | NIPA1       | 0.768616667   | 0           |                |                 |                 |
| 225752 at    | NIPA1       | 0.6157485     | 0.05396551  |                |                 |                 |
| 232158 x at  | NIPAL1      | 0.725093333   | 0.393887585 |                |                 |                 |
| 220128 s at  | NIPAL2      | 0.784361667   | 0.796301331 |                |                 |                 |
| 227001 at    | NIPAL2      | 0.918933167   | 0           |                |                 |                 |
| 202380 s at  | NKTR        | -0.697418333  | 0.796301331 | NKTR           | NKTR            |                 |
| 210113 s at  | NLRP1       | 0.523906667   | 3.701646186 |                |                 |                 |
| 212739 s at  | NME4        | -1.0851975    | 0.137080273 | NME4           |                 |                 |
| 203964 at    | NMI         | 0.650043      | 1.810509752 | NMI            |                 |                 |
| 1569631 at   | NMNAT1      | 0.537738333   | 3.701646186 |                |                 |                 |
| 1552712 a at | NMNAT2      | -0.616658167  | 1.810509752 |                |                 |                 |
| 1556029 s at | NMNAT2      | -0.673486     | 1.123589586 |                |                 |                 |
| 209755 at    | NMNAT2      | -0.966760667  | 0           |                |                 |                 |
| 221567 at    | NOL3        | 0.524391333   | 1.455154512 |                |                 |                 |
| 59625 at     | NOL3        | 0.631228833   | 1.810509752 |                |                 |                 |
| 213462 at    | NPAS2       | 0.575717      | 0.796301331 |                |                 |                 |
| 39548 at     | NPAS2       | 1.078871      | 0           |                |                 |                 |
| 201467 s at  | NQO1        | -0.733438167  | 0.550502435 |                |                 |                 |
| 201468 s at  | NQO1        | -1.436514167  | 0           |                |                 |                 |

| Probe Set ID | Gene Symbol    | miR-128-miRNC | q value (%) | miR-128 tgts_M | miR-128 tgts_TS | miR-128 tgts_PT |
|--------------|----------------|---------------|-------------|----------------|-----------------|-----------------|
| 203504_s_at  | ABCA1          | -1.2890325    | 0           | ABCA1          | ABCA1           | ABCA1           |
| 210519_s_at  | NQO1           | -0.824393333  | 0.550502435 |                |                 |                 |
| 204760_s_at  | NR1D1 /// THRA | 1.198274667   | 0           |                |                 |                 |
| 31637_s_at   | NR1D1 /// THRA | 1.039797      | 0           |                |                 |                 |
| 221803_s_at  | NRBF2          | 0.612307      | 2.499099453 | NRBF2          | NRBF2           | NRBF2           |
| 229422_at    | NRD1           | 0.760673667   | 3.701646186 |                |                 |                 |
| 208062_s_at  | NRG2           | 0.891594333   | 0.137080273 |                |                 |                 |
| 202599_s_at  | NRIP1          | 0.506641667   | 3.029425085 | NRIP1          |                 | NRIP1           |
| 202600_s_at  | NRIP1          | 0.531353333   | 1.810509752 | NRIP1          |                 | NRIP1           |
| 202395_at    | NSF            | 0.5910285     | 1.123589586 |                |                 |                 |
| 232520_s_at  | NSFL1C         | -0.549666     | 2.499099453 | NSFL1C         |                 |                 |
| 224666_at    | NSMCE1         | 0.725165167   | 1.455154512 |                |                 |                 |
| 226351_at    | NSUN4          | 0.507439667   | 2.499099453 | NSUN4          |                 |                 |
| 230023_at    | NSUN4          | 0.667256      | 2.499099453 | NSUN4          |                 |                 |
| 1553994_at   | NT5E           | -0.789125667  | 0           | NT5E           |                 |                 |
| 227486_at    | NT5E           | -0.724681667  | 0           | NT5E           |                 |                 |
| 222020_s_at  | NTM            | 0.57858       | 3.701646186 |                |                 |                 |
| 203978_at    | NUBP1          | 0.621153      | 1.123589586 |                |                 |                 |
| 219347_at    | NUDT15         | 0.548630167   | 3.029425085 |                |                 |                 |
| 224830_at    | NUDT21         | -0.530133667  | 3.701646186 | NUDT21         |                 |                 |
| 230329_s_at  | NUDT6          | 0.536501      | 1.810509752 | NUDT6          |                 |                 |
| 228855_at    | NUDT7          | 0.562276833   | 1.810509752 |                |                 |                 |
| 214963_at    | NUP160         | -0.719685167  | 2.499099453 |                |                 |                 |
| 219007_at    | NUP43          | -0.690653667  | 0.230227638 | NUP43          |                 |                 |
| 210793_s_at  | NUP98          | 0.576817333   | 3.029425085 |                |                 |                 |
| 204435_at    | NUPL1          | 1.368551167   | 0           |                |                 |                 |
| 223984_s_at  | NUPL1          | 0.520492667   | 0.550502435 |                |                 |                 |
| 218039_at    | NUSAP1         | -0.585228333  | 1.123589586 | NUSAP1         |                 |                 |
| 209629_s_at  | NXT2           | -0.581073167  | 1.455154512 | NXT2           | NXT2            | NXT2            |
| 205552_s_at  | OAS1           | 0.802398      | 0           |                |                 |                 |
| 218400_at    | OAS3           | 0.833755333   | 0.05396551  |                |                 |                 |
| 201365_at    | OAZ2           | -0.768668667  | 0.137080273 |                |                 |                 |
| 228781_at    | OBFC1          | 0.706893      | 1.810509752 |                |                 |                 |
| 235537_at    | OCIAD1         | 0.7513805     | 0.550502435 |                |                 |                 |
| 209925_at    | OCLN           | 0.587058333   | 0.550502435 |                |                 |                 |
| 208316_s_at  | OCRL           | 0.500268833   | 2.499099453 |                |                 |                 |
| 200790_at    | ODC1           | 0.566836667   | 0.796301331 |                |                 |                 |
| 221090_s_at  | OGFOD1         | -0.559392667  | 1.123589586 |                |                 |                 |
| 225106_s_at  | OGFOD1         | -0.516329667  | 2.499099453 |                |                 |                 |
| 225110_at    | OGFOD1         | -0.551544667  | 1.123589586 |                |                 |                 |
| 226019_at    | OMA1           | 0.842441333   | 0.230227638 |                |                 |                 |
| 212213_x_at  | OPA1           | -1.022419667  | 0.05396551  | OPA1           | OPA1            |                 |
| 212214_at    | OPA1           | -0.507178333  | 3.029425085 | OPA1           | OPA1            |                 |
| 214306_at    | OPA1           | -0.7973645    | 1.123589586 | OPA1           | OPA1            |                 |
| 219105_x_at  | ORC6L          | -0.700021667  | 0.393887585 | ORC6L          |                 |                 |
| 227548_at    | ORMDL1         | 0.579021833   | 0.393887585 | ORMDL1         |                 |                 |
| 222586_s_at  | OSBPL11        | 0.543385      | 1.810509752 |                |                 |                 |
| 209221_s_at  | OSBPL2         | 0.932426333   | 3.701646186 |                |                 |                 |
| 1554503_a_at | OSCAR          | 0.831291667   | 0.550502435 |                |                 |                 |



| Probe Set ID | Gene Symbol | miR-128-miRNC | q value (%) | miR-128 tgts_M | miR-128 tgts_TS | miR-128 tgts_PT |
|--------------|-------------|---------------|-------------|----------------|-----------------|-----------------|
| 203504_s at  | ABCA1       | -1.2890325    | 0           | ABCA1          | ABCA1           | ABCA1           |
| 242930_at    | OSGEP       | 0.740957667   | 0.137080273 |                |                 |                 |
| 226140_s at  | OTUD1       | 1.242132      | 0           |                |                 |                 |
| 238848_at    | OTUD4       | 0.565106667   | 0.796301331 |                |                 |                 |
| 202780_at    | OXCT1       | -0.522489167  | 0.796301331 |                |                 |                 |
| 210448_s at  | P2RX5       | 0.6323395     | 2.499099453 |                |                 |                 |
| 207455_at    | P2RY1       | 0.867078333   | 1.455154512 |                |                 |                 |
| 207543_s at  | P4HA1       | 0.811555667   | 0.796301331 |                |                 |                 |
| 202733_at    | P4HA2       | 0.855935      | 0.796301331 |                |                 |                 |
| 231838_at    | PABPC1L     | 0.606452667   | 0.230227638 |                |                 |                 |
| 201013_s at  | PAICS       | -0.794818333  | 0.05396551  | PAICS          |                 |                 |
| 222983_s at  | PAIP2       | -0.62235      | 0.05396551  | PAIP2          | PAIP2           | PAIP2           |
| 222984_at    | PAIP2       | -0.774615     | 0.137080273 | PAIP2          | PAIP2           | PAIP2           |
| 209615_s at  | PAK1        | 0.633508333   | 1.123589586 |                |                 |                 |
| 208877_at    | PAK2        | 0.515177      | 2.499099453 |                |                 |                 |
| 208878_s at  | PAK2        | 0.501206667   | 1.455154512 |                |                 |                 |
| 214607_at    | PAK3        | 0.502034333   | 3.701646186 |                |                 |                 |
| 202336_s at  | PAM         | 0.518238333   | 1.810509752 | PAM            |                 |                 |
| 203117_s at  | PAN2        | 1.061411      | 0.796301331 |                |                 |                 |
| 228966_at    | PANK2       | 1.0481015     | 0.550502435 | PANK2          |                 |                 |
| 211918_x at  | PAPPA2      | 0.794561833   | 0.393887585 |                |                 |                 |
| 228237_at    | PAPPA2      | 1.070477      | 0.137080273 |                |                 |                 |
| 214834_at    | PAR5        | -0.674282167  | 3.701646186 |                |                 |                 |
| 211907_s at  | PARD6B      | 1.496513      | 0           |                | PARD6B          |                 |
| 214827_at    | PARD6B      | 1.69516       | 0           |                | PARD6B          |                 |
| 235165_at    | PARD6B      | 1.681253333   | 0           |                | PARD6B          |                 |
| 218271_s at  | PARL        | -0.540877833  | 3.701646186 |                |                 |                 |
| 228881_at    | PARL        | -0.518709167  | 1.455154512 |                |                 |                 |
| 204752_x at  | PARP2       | -0.653551833  | 1.123589586 |                |                 |                 |
| 215773_x at  | PARP2       | -0.554933667  | 1.810509752 |                |                 |                 |
| 234710_s at  | PARP6       | 0.688543333   | 0.230227638 |                |                 |                 |
| 229515_at    | PAWR        | -0.503239     | 0.550502435 | PAWR           |                 |                 |
| 220355_s at  | PBRM1       | 0.847014667   | 0.393887585 |                |                 |                 |
| 223238_s at  | PBRM1       | 0.616893167   | 1.810509752 |                |                 |                 |
| 223899_at    | PBRM1       | 0.868913167   | 2.499099453 |                |                 |                 |
| 223900_s at  | PBRM1       | 0.567441667   | 1.810509752 |                |                 |                 |
| 224152_s at  | PBRM1       | 0.716808333   | 0.393887585 |                |                 |                 |
| 204082_at    | PBX3        | 0.629165      | 0.393887585 |                |                 |                 |
| 213517_at    | PCBP2       | 0.793385      | 1.810509752 |                |                 |                 |
| 238114_at    | PCMTD1      | -0.564876833  | 3.701646186 |                |                 |                 |
| 219295_s at  | PCOLCE2     | 0.763237667   | 1.455154512 |                |                 |                 |
| 205559_s at  | PCSK5       | 1.0386215     | 0           |                |                 |                 |
| 205560_at    | PCSK5       | 0.882286167   | 0.05396551  |                |                 |                 |
| 213652_at    | PCSK5       | 0.990036      | 0.230227638 |                |                 |                 |
| 218676_s at  | PCTP        | -0.697164167  | 1.123589586 | PCTP           |                 |                 |
| 218953_s at  | PCYOX1L     | 1.004265833   | 0           |                |                 |                 |
| 220049_s at  | PDCD1LG2    | 0.655231167   | 2.499099453 |                |                 |                 |
| 224399_at    | PDCD1LG2    | 0.707691167   | 0           |                |                 |                 |
| 204025_s at  | PDCD2       | 0.683951333   | 1.810509752 |                |                 |                 |
| 212594_at    | PDCD4       | 0.644791667   | 0.796301331 |                |                 |                 |
| 208591_s at  | PDE3B       | -0.671088333  | 1.123589586 |                | PDE3B           |                 |

| Probe Set ID | Gene Symbol | miR-128-miRNC | q value (%) | miR-128 tgts_M | miR-128 tgts_TS | miR-128 tgts_PT |
|--------------|-------------|---------------|-------------|----------------|-----------------|-----------------|
| 203504 s at  | ABCA1       | -1.2890325    | 0           | ABCA1          | ABCA1           | ABCA1           |
| 206757 at    | PDE5A       | 1.0000735     | 1.123589586 |                |                 |                 |
| 212521 s at  | PDE8A       | 0.598371667   | 0.137080273 |                |                 |                 |
| 205463 s at  | PDGFA       | 0.654759333   | 0.393887585 |                |                 |                 |
| 216867 s at  | PDGFA       | 0.799891667   | 1.123589586 |                |                 |                 |
| 222860 s at  | PDGFD       | 1.106136833   | 0           |                |                 |                 |
| 203067 at    | PDHX        | -0.729284333  | 1.455154512 | PDHX           | PDHX            |                 |
| 211048 s at  | PDIA4       | 0.713300833   | 0.393887585 |                |                 |                 |
| 203857 s at  | PDIA5       | -0.9857715    | 0.393887585 | PDIA5          | PDIA5           | PDIA5           |
| 206686 at    | PDK1        | -0.754323333  | 0           | PDK1           | PDK1            |                 |
| 226452 at    | PDK1        | -0.742918333  | 0.05396551  | PDK1           | PDK1            |                 |
| 206348 s at  | PDK3        | 0.931314833   | 1.123589586 |                |                 |                 |
| 203243 s at  | PDLIM5      | 0.632546667   | 0.796301331 |                |                 |                 |
| 224986 s at  | PDPK1       | -0.610532167  | 0.393887585 |                | PDPK1           |                 |
| 1554634 at   | PDS5B       | -1.396893167  | 0           | PDS5B          | PDS5B           | PDS5B           |
| 219307 at    | PDSS2       | 0.985278667   | 0           |                |                 |                 |
| 209493 at    | PDZD2       | 0.6899595     | 0.796301331 |                |                 |                 |
| 200787 s at  | PEA15       | -0.698291667  | 3.029425085 |                |                 |                 |
| 200788 s at  | PEA15       | -0.654291667  | 0.796301331 |                |                 |                 |
| 205353 s at  | PEBP1       | -0.548215     | 1.810509752 |                |                 |                 |
| 210825 s at  | PEBP1       | -0.50309      | 1.810509752 |                |                 |                 |
| 211941 s at  | PEBP1       | -0.8817345    | 1.123589586 |                |                 |                 |
| 1553140 at   | PELO        | 0.671989167   | 0.137080273 |                |                 |                 |
| 208518 s at  | PER2        | 0.955391833   | 0.393887585 |                |                 |                 |
| 1555131 a at | PER3        | 1.117877167   | 0           |                |                 |                 |
| 41858 at     | PGAP2       | 0.690179833   | 1.810509752 | PGAP2          |                 |                 |
| 243815 at    | PGBD4       | 0.749064333   | 0.550502435 |                |                 |                 |
| 203501 at    | PGCP        | 0.955409333   | 0.550502435 |                |                 |                 |
| 208454 s at  | PGCP        | 0.544722      | 0.550502435 |                |                 |                 |
| 235615 at    | PGGT1B      | -0.680436167  | 3.029425085 | PGGT1B         |                 |                 |
| 229553 at    | PGM2L1      | 0.885473167   | 0.393887585 |                | PGM2L1          | PGM2L1          |
| 222622 at    | PGP         | -0.644207833  | 1.810509752 |                |                 |                 |
| 213638 at    | PHACTR1     | 0.720334333   | 0.230227638 |                |                 |                 |
| 219235 s at  | PHACTR4     | 0.565450333   | 1.455154512 |                |                 |                 |
| 200658 s at  | PHB         | -1.0250625    | 1.810509752 | PHB            | PHB             | PHB             |
| 200919 at    | PHC2        | -1.017561333  | 0.550502435 | PHC2           | PHC2            |                 |
| 238693 at    | PHC3        | 0.766399333   | 1.455154512 |                |                 |                 |
| 204866 at    | PHF16       | 0.7631665     | 1.810509752 |                |                 |                 |
| 235389 at    | PHF20       | -0.588654     | 3.701646186 | PHF20          | PHF2            |                 |
| 224442 at    | PHF6        | -0.7646435    | 1.455154512 | PHF6           |                 | PHF6            |
| 201397 at    | PHGDH       | -0.825602167  | 0.05396551  | PHGDH          | PHGDH           |                 |
| 217999 s at  | PHLDA1      | 0.545875      | 1.455154512 |                |                 |                 |
| 225842 at    | PHLDA1      | 0.534828333   | 2.499099453 |                |                 |                 |
| 212134 at    | PHLDB1      | 0.720218      | 1.123589586 |                |                 |                 |
| 213407 at    | PHLPP2      | 0.6514845     | 0.796301331 |                |                 |                 |
| 210191 s at  | PHTF1       | 0.560072667   | 0.137080273 |                |                 |                 |
| 209780 at    | PHTF2       | 0.525441333   | 3.701646186 |                |                 |                 |
| 217097 s at  | PHTF2       | 0.698307167   | 1.810509752 |                |                 |                 |
| 203035 s at  | PIAS3       | 0.535269333   | 2.499099453 |                |                 |                 |
| 212511 at    | PICALM      | -0.594329167  | 3.701646186 |                |                 |                 |
| 205078 at    | PIGF        | 0.746955167   | 0.796301331 |                |                 |                 |

| Probe Set ID | Gene Symbol | miR-128-miRNC | q value (%) | miR-128 tgts_M | miR-128 tgts_TS | miR-128 tgts_PT |
|--------------|-------------|---------------|-------------|----------------|-----------------|-----------------|
| 203504 s at  | ABCA1       | -1.2890325    | 0           | ABCA1          | ABCA1           | ABCA1           |
| 209625 at    | PIGH        | 0.879984833   | 0           |                |                 |                 |
| 213889 at    | PIGL        | 1.003486333   | 0.137080273 |                |                 |                 |
| 219048 at    | PIGN        | 1.151709      | 0           |                |                 |                 |
| 232101 s at  | PIGN        | 1.500877167   | 0           |                |                 |                 |
| 1552291 at   | PIGX        | 0.596370333   | 1.810509752 |                |                 |                 |
| 1563111 a at | PIGX        | 0.552261333   | 1.455154512 |                |                 |                 |
| 224660 at    | PIGY        | -0.674981833  | 0.393887585 |                |                 |                 |
| 213070 at    | PIK3C2A     | -0.8423785    | 0.550502435 | PIK3C2A        |                 |                 |
| 203879 at    | PIK3CD      | -0.500533     | 3.701646186 |                |                 |                 |
| 1557719 at   | PIKFYVE     | 0.656238333   | 1.123589586 |                |                 |                 |
| 219155 at    | PITPNC1     | 0.5456575     | 0.796301331 |                |                 |                 |
| 218667 at    | PJA1        | 0.568142333   | 1.455154512 |                |                 |                 |
| 203688 at    | PKD2        | 0.588998333   | 3.029425085 |                |                 |                 |
| 204612 at    | PKIA        | 0.671091667   | 0.550502435 | PKIA           |                 | PKIA            |
| 216004 s at  | PKNOX1      | 0.659656      | 1.455154512 |                |                 |                 |
| 210145 at    | PLA2G4A     | 1.373579667   | 0           |                |                 |                 |
| 219014 at    | PLAC8       | -0.6853255    | 1.123589586 |                |                 |                 |
| 209318 x at  | PLAGL1      | -0.981530333  | 0           | PLAGL1         |                 |                 |
| 211925 s at  | PLCB1       | 0.821602667   | 1.123589586 | PLCB1          |                 |                 |
| 224505 s at  | PLCD4       | 0.512745333   | 2.499099453 |                |                 |                 |
| 204613 at    | PLCG2       | 0.531142833   | 1.810509752 |                |                 |                 |
| 205934 at    | PLCL1       | 1.514160167   | 0           |                |                 |                 |
| 213309 at    | PLCL2       | 0.589469167   | 2.499099453 | PLCL2          |                 |                 |
| 218951 s at  | PLCXD1      | 0.6258695     | 2.499099453 |                |                 |                 |
| 235230 at    | PLCXD2      | -0.742183833  | 3.701646186 |                |                 |                 |
| 244430 at    | PLD6        | -0.785467667  | 2.499099453 | PLD6           |                 |                 |
| 201373 at    | PLEC1       | -0.724834167  | 3.029425085 |                |                 |                 |
| 216971 s at  | PLEC1       | -0.783949333  | 3.029425085 |                |                 |                 |
| 226247 at    | PLEKHA1     | 0.956074167   | 0           | PLEKHA1        |                 |                 |
| 238013 at    | PLEKHA2     | 0.607759167   | 1.455154512 | PLEKHA2        |                 |                 |
| 233040 at    | PLEKHA5     | -0.755658167  | 3.029425085 | PLEKHA5        |                 |                 |
| 227247 at    | PLEKHA8     | 0.817732      | 0.550502435 |                |                 |                 |
| 202122 s at  | PLIN3       | -0.6204925    | 2.499099453 |                |                 |                 |
| 202240 at    | PLK1        | -0.8177395    | 2.499099453 |                |                 |                 |
| 201939 at    | PLK2        | -0.53267      | 1.455154512 | PLK2           | PLK2            | PLK2            |
| 204938 s at  | PLN         | -0.629954833  | 2.499099453 |                |                 |                 |
| 205190 at    | PLS1        | 0.662077333   | 3.701646186 |                |                 |                 |
| 1558140 at   | PLXNA1      | 0.917825667   | 1.123589586 |                |                 |                 |
| 221538 s at  | PLXNA1      | 0.850208167   | 1.455154512 |                |                 |                 |
| 1567519 at   | PLXNA3      | 0.617073667   | 3.029425085 |                |                 |                 |
| 206471 s at  | PLXNC1      | 1.020073333   | 0.137080273 |                |                 |                 |
| 217875 s at  | PMEPA1      | 0.880956833   | 1.810509752 |                |                 |                 |
| 222449 at    | PMEPA1      | 1.556049333   | 0           |                |                 |                 |
| 222450 at    | PMEPA1      | 1.519276333   | 0.05396551  |                |                 |                 |
| 212037 at    | PNN         | -0.84844      | 1.810509752 |                |                 |                 |
| 212836 at    | POLD3       | -0.579267167  | 0.230227638 |                |                 |                 |
| 212100 s at  | POLDIP3     | 0.794360667   | 0.550502435 |                |                 |                 |
| 215357 s at  | POLDIP3     | 0.6503445     | 0.796301331 |                |                 |                 |
| 219317 at    | POLI        | 0.544472833   | 1.123589586 |                |                 |                 |
| 223261 at    | POLK        | 0.6424215     | 3.701646186 |                |                 |                 |

| Probe Set ID | Gene Symbol | miR-128-miRNC | q value (%) | miR-128 tgts_M | miR-128 tgts_TS | miR-128 tgts_PT |
|--------------|-------------|---------------|-------------|----------------|-----------------|-----------------|
| 203504 s at  | ABCA1       | -1.2890325    | 0           | ABCA1          | ABCA1           | ABCA1           |
| 209317 at    | POLR1C      | 0.71646       | 0.796301331 |                |                 |                 |
| 231041 at    | POLR1E      | 0.524183333   | 1.810509752 |                |                 |                 |
| 211730 s at  | POLR2L      | -0.6459745    | 1.810509752 |                |                 |                 |
| 227872 at    | POLR3A      | 0.920119      | 0           |                |                 |                 |
| 208361 s at  | POLR3D      | 0.808801333   | 0.796301331 |                |                 |                 |
| 222490 at    | POLR3E      | 0.532518      | 3.701646186 |                |                 |                 |
| 217944 at    | POMGNT1     | 0.888077      | 3.701646186 |                |                 |                 |
| 242700 at    | PON2        | 0.592585333   | 0           | PON2           |                 |                 |
| 204839 at    | POP5        | 0.5068985     | 1.810509752 |                |                 |                 |
| 209482 at    | POP7        | -0.510388833  | 3.701646186 |                |                 |                 |
| 212226 s at  | PPAP2B      | -1.288412167  | 0.796301331 | PPAP2B         |                 |                 |
| 212230 at    | PPAP2B      | -0.918661     | 0.796301331 | PPAP2B         |                 |                 |
| 223568 s at  | PPAPDC1B    | 0.727580167   | 0.393887585 |                |                 |                 |
| 223569 at    | PPAPDC1B    | 0.893052      | 0           |                |                 |                 |
| 226150 at    | PPAPDC1B    | 1.238480667   | 0           |                |                 |                 |
| 226384 at    | PPAPDC1B    | 0.656990167   | 0.550502435 |                |                 |                 |
| 206870 at    | PPARA       | 1.076342333   | 0           |                | PPARA           |                 |
| 223438 s at  | PPARA       | 1.015817667   | 0           |                | PPARA           |                 |
| 244689 at    | PPARA       | 1.217887667   | 1.455154512 |                | PPARA           |                 |
| 215959 at    | PPFIBP2     | 0.933170167   | 0           | PPFIBP2        |                 |                 |
| 226336 at    | PPIA        | -0.686982167  | 2.499099453 |                |                 |                 |
| 204517 at    | PPIC        | 0.575556667   | 3.701646186 |                |                 |                 |
| 204518 s at  | PPIC        | 0.700708333   | 0.393887585 |                |                 |                 |
| 204186 s at  | PPID        | 0.614433333   | 0.230227638 |                |                 |                 |
| 228469 at    | PPID        | 0.791551333   | 3.701646186 |                |                 |                 |
| 201489 at    | PPIF        | -0.818572833  | 0.137080273 | PPIF           | PPIF            |                 |
| 201490 s at  | PPIF        | -0.805433     | 0.550502435 | PPIF           | PPIF            |                 |
| 217841 s at  | PPME1       | -0.789642333  | 3.701646186 | PPME1          | PPME1           | PPME1           |
| 49077 at     | PPME1       | -0.846704833  | 0.05396551  | PPME1          | PPME1           | PPME1           |
| 200726 at    | PPP1CC      | -0.739175     | 0.230227638 | PPP1CC         | PPP1CC          | PPP1CC          |
| 201702 s at  | PPP1R10     | 0.575063333   | 1.810509752 |                |                 |                 |
| 216347 s at  | PPP1R13B    | 1.2429255     | 0           |                |                 |                 |
| 224692 at    | PPP1R15B    | 1.026138      | 0.05396551  |                |                 |                 |
| 1552670 a at | PPP1R3B     | 0.581086667   | 0.796301331 |                |                 |                 |
| 222662 at    | PPP1R3B     | 0.816196167   | 0.230227638 |                |                 |                 |
| 204554 at    | PPP1R3D     | 0.825358167   | 0.796301331 |                |                 |                 |
| 227409 at    | PPP1R3E     | 0.780701167   | 0.05396551  |                |                 |                 |
| 227412 at    | PPP1R3E     | 0.629643      | 3.029425085 |                |                 |                 |
| 231966 at    | PPP1R9A     | 0.687054167   | 3.701646186 |                | PPP1R9A         |                 |
| 202313 at    | PPP2R2A     | 0.597698333   | 0.796301331 | PPP2R2A        |                 |                 |
| 225066 at    | PPP2R2D     | 0.831368      | 0.230227638 |                |                 |                 |
| 209633 at    | PPP2R3A     | -0.646892667  | 0.137080273 | PPP2R3A        |                 |                 |
| 209817 at    | PPP3CB      | 0.943735333   | 0           |                |                 |                 |
| 203529 at    | PPP6C       | 0.678163      | 0.550502435 |                |                 |                 |
| 225426 at    | PPP6C       | 1.224638333   | 0           |                |                 |                 |
| 225429 at    | PPP6C       | 0.959136      | 0.137080273 |                |                 |                 |
| 225204 at    | PPTC7       | 0.51952       | 2.499099453 |                |                 |                 |
| 225213 at    | PPTC7       | 0.53257       | 3.029425085 |                |                 |                 |
| 230015 at    | PRCD        | 0.781360333   | 1.455154512 |                |                 |                 |
| 217192 s at  | PRDM1       | 0.815375833   | 0.230227638 |                |                 |                 |

| Probe Set ID | Gene Symbol | miR-128-miRNC | q value (%) | miR-128 tgts_M | miR-128 tgts_TS | miR-128 tgts_PT |
|--------------|-------------|---------------|-------------|----------------|-----------------|-----------------|
| 203504 s at  | ABCA1       | -1.2890325    | 0           | ABCA1          | ABCA1           | ABCA1           |
| 228964 at    | PRDM1       | 1.023198      | 2.499099453 |                |                 |                 |
| 201923 at    | PRDX4       | 0.75584       | 0           |                |                 |                 |
| 224909 s at  | PREX1       | 0.945176333   | 3.701646186 |                |                 |                 |
| 226065 at    | PRICKLE1    | -1.089096667  | 0           | PRICKLE1       |                 |                 |
| 226069 at    | PRICKLE1    | -0.8546405    | 0.230227638 | PRICKLE1       |                 |                 |
| 230708 at    | PRICKLE1    | -0.867449333  | 1.455154512 | PRICKLE1       |                 |                 |
| 225968 at    | PRICKLE2    | 1.066466333   | 3.029425085 |                |                 | PRICKLE2        |
| 227892 at    | PRKAA2      | 0.786268      | 0.05396551  |                |                 |                 |
| 240349 at    | PRKAA2      | 0.5156745     | 3.029425085 |                |                 |                 |
| 1558027 s at | PRKAB2      | 0.959563333   | 0           |                |                 |                 |
| 214474 at    | PRKAB2      | 0.993001333   | 0.05396551  |                |                 |                 |
| 225278 at    | PRKAB2      | 0.724419833   | 0.393887585 |                |                 |                 |
| 233748 x at  | PRKAG2      | -0.620658667  | 2.499099453 | PRKAG2         |                 |                 |
| 242482 at    | PRKAR1A     | 1.503585833   | 0           |                |                 |                 |
| 213010 at    | PRKCDBP     | -0.872613167  | 1.455154512 |                |                 |                 |
| 205880 at    | PRKD1       | -0.517797833  | 2.499099453 | PRKD1          | PRKD1           | PRKD1           |
| 211380 s at  | PRKG1       | 0.981884333   | 0           |                |                 |                 |
| 226687 at    | PRPF40A     | -1.136711833  | 0.05396551  |                |                 |                 |
| 202126 at    | PRPF4B      | 0.549811333   | 0.796301331 |                |                 |                 |
| 219392 x at  | PRR11       | -0.671418333  | 0           |                |                 |                 |
| 204919 at    | PRR4        | 0.532517167   | 2.499099453 |                |                 |                 |
| 202458 at    | PRSS23      | -0.961693333  | 0           |                |                 |                 |
| 226279 at    | PRSS23      | -0.638842     | 1.810509752 |                |                 |                 |
| 229441 at    | PRSS23      | -0.702657     | 1.810509752 |                |                 |                 |
| 229178 at    | PRTG        | 0.720053      | 0.137080273 | PRTG           |                 |                 |
| 209599 s at  | PRUNE       | 1.059869667   | 0           |                |                 |                 |
| 232490 s at  | PRUNE       | 0.817574833   | 0.230227638 |                |                 |                 |
| 226381 at    | PS1TP4      | -0.636035667  | 1.810509752 |                |                 |                 |
| 203354 s at  | PSD3        | 0.552446667   | 0.393887585 |                |                 |                 |
| 203355 s at  | PSD3        | 0.836010667   | 0.393887585 |                |                 |                 |
| 201316 at    | PSMA2       | -0.5346315    | 0           |                |                 |                 |
| 204279 at    | PSMB9       | 0.567619167   | 3.029425085 | PSMB9          |                 |                 |
| 202353 s at  | PSMD12      | -0.524493333  | 0.796301331 |                |                 |                 |
| 228217 s at  | PSMG4       | -0.640708333  | 1.123589586 |                |                 |                 |
| 205194 at    | PSPH        | 0.625292333   | 2.499099453 |                |                 |                 |
| 201896 s at  | PSRC1       | -0.921874     | 0.137080273 |                |                 |                 |
| 230129 at    | PSTK        | 0.8569735     | 0.137080273 |                |                 |                 |
| 211271 x at  | PTBP1       | -0.71181      | 3.701646186 |                |                 |                 |
| 218683 at    | PTBP2       | -0.6487545    | 0.550502435 | PTBP2          |                 |                 |
| 218967 s at  | PTER        | -0.993176667  | 1.810509752 | PTER           |                 | PTER            |
| 222798 at    | PTER        | -0.850812333  | 1.123589586 | PTER           |                 | PTER            |
| 230774 at    | PTGR2       | 0.6760315     | 2.499099453 |                |                 |                 |
| 238669 at    | PTGS1       | 2.041026667   | 1.123589586 |                |                 |                 |
| 209466 x at  | PTN         | 1.760239333   | 0           |                |                 |                 |
| 211737 x at  | PTN         | 2.030057667   | 0           |                |                 |                 |
| 200732 s at  | PTP4A1      | 0.564447333   | 1.123589586 |                |                 |                 |
| 208615 s at  | PTP4A2      | -0.598748333  | 3.029425085 |                |                 |                 |
| 227741 at    | PTPLB       | 0.515265333   | 2.499099453 |                |                 |                 |
| 213136 at    | PTPN2       | 0.668641      | 1.123589586 |                |                 |                 |
| 241622 at    | PTPN2       | 0.722165667   | 3.029425085 |                |                 |                 |

| Probe Set ID | Gene Symbol | miR-128-miRNC | q value (%) | miR-128 tgts_M | miR-128 tgts_TS | miR-128 tgts_PT |
|--------------|-------------|---------------|-------------|----------------|-----------------|-----------------|
| 203504 s at  | ABCA1       | -1.2890325    | 0           | ABCA1          | ABCA1           | ABCA1           |
| 241623 at    | PTPN2       | 0.588292333   | 0.796301331 |                |                 |                 |
| 241983 at    | PTPN2       | 0.934103167   | 3.701646186 |                |                 |                 |
| 1320 at      | PTPN21      | 0.8744265     | 0.550502435 |                |                 |                 |
| 205438 at    | PTPN21      | 0.830026333   | 0.05396551  |                |                 |                 |
| 226380 at    | PTPN21      | 0.694218333   | 3.029425085 |                |                 |                 |
| 40524 at     | PTPN21      | 0.991356      | 0           |                |                 |                 |
| 208010 s at  | PTPN22      | 2.186679167   | 0           |                |                 |                 |
| 227944 at    | PTPN3       | 0.9068975     | 0           |                | PTPN3           | PTPN3           |
| 213795 s at  | PTPRA       | 0.634148333   | 2.499099453 | PTPRA          |                 |                 |
| 210173 at    | PTPRJ       | 1.562673333   | 0           | PTPRJ          |                 |                 |
| 214137 at    | PTPRJ       | 0.5507235     | 1.810509752 | PTPRJ          |                 |                 |
| 227396 at    | PTPRJ       | 1.300752      | 0           | PTPRJ          |                 |                 |
| 203029 s at  | PTPRN2      | 0.603990667   | 2.499099453 |                |                 |                 |
| 203030 s at  | PTPRN2      | 0.651452167   | 3.701646186 |                |                 |                 |
| 211534 x at  | PTPRN2      | 0.818272667   | 1.123589586 |                |                 |                 |
| 203554 x at  | PTTG1       | -0.71956      | 1.810509752 |                |                 |                 |
| 206157 at    | PTX3        | -0.554395333  | 1.810509752 |                |                 |                 |
| 1553280 at   | PUS10       | 0.963974      | 0.550502435 |                |                 |                 |
| 214443 at    | PVR         | 0.867335167   | 0.230227638 | PVR            |                 |                 |
| 214444 s at  | PVR         | 0.618465      | 1.455154512 | PVR            |                 |                 |
| 216283 s at  | PVR         | 0.535713667   | 3.029425085 | PVR            |                 |                 |
| 32699 s at   | PVR         | 0.5120695     | 1.810509752 | PVR            |                 |                 |
| 1562153 a at | PVT1        | -0.959949333  | 1.123589586 | PVT1           |                 |                 |
| 201607 at    | PWP1        | -0.624076833  | 1.123589586 |                |                 |                 |
| 228336 at    | PWWP2A      | 0.842858333   | 3.029425085 | PWWP2A         |                 |                 |
| 228337 at    | PWWP2A      | 0.754866833   | 1.123589586 | PWWP2A         |                 |                 |
| 1552275 s at | PXK         | 0.519450333   | 1.810509752 |                |                 |                 |
| 201087 at    | PXN         | -0.660811167  | 0.796301331 |                | PXN             |                 |
| 211823 s at  | PXN         | -0.5105865    | 3.029425085 |                | PXN             |                 |
| 215520 at    | PYGO1       | -0.507015167  | 1.455154512 |                |                 |                 |
| 209123 at    | QDPR        | -0.858428167  | 0.05396551  |                |                 |                 |
| 205174 s at  | QPCT        | 1.436272333   | 0           |                |                 |                 |
| 229982 at    | QSER1       | 0.574061667   | 0.550502435 |                |                 |                 |
| 203831 at    | R3HDM2      | 0.538233333   | 1.123589586 | R3HDM2         |                 |                 |
| 203883 s at  | RAB11FIP2   | 0.663509333   | 3.029425085 | RAB11FIP2      |                 |                 |
| 243496 at    | RAB18       | 0.6137905     | 3.701646186 |                |                 |                 |
| 213405 at    | RAB22A      | -0.891013667  | 0.550502435 |                |                 |                 |
| 209515 s at  | RAB27A      | -0.513471667  | 1.810509752 | RAB27A         |                 |                 |
| 207018 s at  | RAB27B      | 0.721332833   | 3.029425085 |                |                 |                 |
| 227842 at    | RAB30       | -0.701617     | 3.701646186 |                |                 |                 |
| 224710 at    | RAB34       | -0.626698833  | 1.455154512 | RAB34          |                 |                 |
| 223471 at    | RAB3IP      | 0.813611333   | 0.393887585 |                |                 |                 |
| 228432 at    | RAB3IP      | 0.919318333   | 0.05396551  |                |                 |                 |
| 231399 at    | RAB3IP      | 0.776162167   | 1.810509752 |                |                 |                 |
| 238526 at    | RAB3IP      | 1.013137667   | 1.455154512 |                |                 |                 |
| 238853 at    | RAB3IP      | 1.156893      | 0           |                |                 |                 |
| 204547 at    | RAB40B      | 0.712555167   | 0.393887585 |                |                 |                 |
| 228521 s at  | RAB4B       | 0.759191833   | 0           |                |                 |                 |
| 208819 at    | RAB8A       | -0.650670333  | 0.796301331 |                |                 |                 |
| 213982 s at  | RABGAP1L    | 0.502083333   | 1.810509752 | RABGAP1L       |                 |                 |

| Probe Set ID | Gene Symbol | miR-128-miRNC | q value (%) | miR-128 tgts_M | miR-128 tgts_TS | miR-128 tgts_PT |
|--------------|-------------|---------------|-------------|----------------|-----------------|-----------------|
| 203504 s at  | ABCA1       | -1.2890325    | 0           | ABCA1          | ABCA1           | ABCA1           |
| 215342 s at  | RABGAP1L    | 0.6718605     | 1.455154512 | RABGAP1L       |                 |                 |
| 203573 s at  | RABGGTA     | 0.592765833   | 1.123589586 |                |                 |                 |
| 213970 at    | RABL3       | 0.729621333   | 2.499099453 |                |                 |                 |
| 222077 s at  | RACGAP1     | 0.837507167   | 0.796301331 |                |                 |                 |
| 200608 s at  | RAD21       | -0.589421667  | 3.701646186 | RAD21          |                 |                 |
| 223598 at    | RAD23B      | -0.7634595    | 0.230227638 |                |                 |                 |
| 208393 s at  | RAD50       | 0.518304333   | 0.393887585 | RAD50          |                 |                 |
| 209349 at    | RAD50       | 0.976756333   | 0.393887585 | RAD50          |                 |                 |
| 37793 r at   | RAD51L3     | -0.674233333  | 0.05396551  | RAD51L3        |                 |                 |
| 205647 at    | RAD52       | 0.562477      | 1.123589586 | RAD52          |                 |                 |
| 210630 s at  | RAD52       | 0.742103167   | 0           | RAD52          |                 |                 |
| 206591 at    | RAG1        | 0.869118667   | 3.701646186 | RAG1           |                 |                 |
| 221809 at    | RANBP10     | 0.628279167   | 0.393887585 |                |                 |                 |
| 53987 at     | RANBP10     | 0.644900833   | 0.137080273 |                |                 |                 |
| 237856 at    | RAP1GDS1    | -0.560750333  | 1.810509752 |                |                 |                 |
| 225186 at    | RAPH1       | 0.546698333   | 1.123589586 |                |                 |                 |
| 225188 at    | RAPH1       | 0.509177333   | 3.701646186 |                |                 |                 |
| 232901 at    | RARS2       | 0.933751167   | 1.455154512 |                |                 |                 |
| 202677 at    | RASA1       | -0.544778167  | 1.810509752 |                |                 |                 |
| 1553986 at   | RASEF       | 0.887314667   | 0           |                |                 |                 |
| 1553122 s at | RBAK        | 0.678498333   | 1.810509752 |                |                 |                 |
| 228571 at    | RBAK        | 0.906070167   | 0.393887585 |                |                 |                 |
| 225396 at    | RBBP4       | -0.859317333  | 0.05396551  |                |                 |                 |
| 237333 at    | RBBP4       | -0.506253333  | 1.123589586 |                |                 |                 |
| 244872 at    | RBBP4       | -0.6771615    | 2.499099453 |                |                 |                 |
| 224780 at    | RBM17       | -0.522205667  | 0.550502435 |                |                 |                 |
| 224068 x at  | RBM22       | 0.553771167   | 3.029425085 |                |                 |                 |
| 212033 at    | RBM25       | -0.578062833  | 2.499099453 |                |                 |                 |
| 208319 s at  | RBM3        | -0.783335     | 0.550502435 |                |                 |                 |
| 219754 at    | RBM41       | 0.913181833   | 0.550502435 |                |                 |                 |
| 229440 at    | RBM47       | 0.7083755     | 1.123589586 |                |                 |                 |
| 213852 at    | RBM8A       | -0.5475355    | 1.123589586 |                |                 |                 |
| 217856 at    | RBM8A       | -0.921110833  | 0.796301331 |                |                 |                 |
| 216215 s at  | RBM9        | 0.513982667   | 1.810509752 |                |                 |                 |
| 225310 at    | RBMX        | -0.594295     | 0.796301331 |                |                 |                 |
| 207836 s at  | RBPMS       | 0.610321667   | 2.499099453 | RBPMS          |                 |                 |
| 218117 at    | RBX1        | -0.804696167  | 0.230227638 | RBX1           |                 |                 |
| 220202 s at  | RC3H2       | 0.818058333   | 0.05396551  | RC3H2          |                 |                 |
| 225813 at    | RC3H2       | 0.76392       | 0.796301331 | RC3H2          |                 |                 |
| 230134 s at  | RC3H2       | 0.793653      | 0.137080273 | RC3H2          |                 |                 |
| 231716 at    | RC3H2       | 0.752139667   | 0           | RC3H2          |                 |                 |
| 238421 at    | RC3H2       | 1.263754      | 0           | RC3H2          |                 |                 |
| 208370 s at  | RCAN1       | 0.5240925     | 1.123589586 |                |                 |                 |
| 204759 at    | RCBTB2      | 1.482002833   | 0           |                |                 |                 |
| 212749 s at  | RCHY1       | -0.709529667  | 0.137080273 | RCHY1          |                 |                 |
| 204969 s at  | RDX         | -0.553103333  | 1.455154512 | RDX            |                 |                 |
| 212398 at    | RDX         | -0.542493333  | 1.123589586 | RDX            |                 |                 |
| 224366 s at  | REPS1       | -0.6564075    | 0           | REPS1          | REPS1           | REPS1           |
| 205645 at    | REPS2       | 1.275104667   | 0           |                |                 |                 |
| 204535 s at  | REST        | 0.544633      | 2.499099453 |                |                 |                 |

| Probe Set ID | Gene Symbol | miR-128-miRNC | q value (%) | miR-128 tgts_M | miR-128 tgts_TS | miR-128 tgts_PT |
|--------------|-------------|---------------|-------------|----------------|-----------------|-----------------|
| 203504 s at  | ABCA1       | -1.2890325    | 0           | ABCA1          | ABCA1           | ABCA1           |
| 233613 x at  | REXO2       | 0.532053333   | 1.810509752 |                |                 |                 |
| 1552651 a at | RFFL        | 0.528475333   | 1.455154512 |                |                 |                 |
| 1562603 at   | RFFL        | 0.6030065     | 2.499099453 |                |                 |                 |
| 237919 at    | RFFL        | 0.766483333   | 0.393887585 |                |                 |                 |
| 203225 s at  | RFK         | 0.687941333   | 2.499099453 |                |                 |                 |
| 238810 at    | RFX3        | 1.132478667   | 0           |                |                 |                 |
| 208492 at    | RFXAP       | -0.735281167  | 3.029425085 |                |                 |                 |
| 229431 at    | RFXAP       | -0.8355455    | 0           |                |                 |                 |
| 231877 at    | RG9MTD2     | 1.255160667   | 3.701646186 |                |                 |                 |
| 242450 at    | RGMB        | -0.673698667  | 0.796301331 |                |                 |                 |
| 1554003 at   | RGNEF       | -0.6533505    | 1.455154512 |                |                 |                 |
| 203169 at    | RGP1        | 0.524015      | 1.810509752 |                |                 |                 |
| 220334 at    | RGS17       | 1.349857      | 0.393887585 | RGS17          | RGS17           |                 |
| 1554500 a at | RGS7        | 0.912780667   | 0.796301331 |                |                 |                 |
| 216970 at    | RGS7        | 1.138286      | 0.393887585 |                |                 |                 |
| 226948 at    | RHBDD1      | 1.019165      | 3.701646186 |                |                 |                 |
| 219202 at    | RHBDF2      | 0.739597167   | 2.499099453 | RHBDF2         |                 |                 |
| 1554539 a at | RHOF        | -0.855184     | 2.499099453 |                |                 |                 |
| 222148 s at  | RHOT1       | 0.502286667   | 3.701646186 | RHOT1          |                 |                 |
| 227196 at    | RHPN2       | 0.684104167   | 1.810509752 |                |                 |                 |
| 203431 s at  | RICS        | 0.507187833   | 2.499099453 |                |                 |                 |
| 233781 s at  | RIF1        | -0.994803833  | 0           |                |                 |                 |
| 208371 s at  | RING1       | 0.566574167   | 2.499099453 |                |                 |                 |
| 202130 at    | RIOK3       | -0.593442667  | 0.796301331 | RIOK3          |                 |                 |
| 218979 at    | RMI1        | -1.093354667  | 0.393887585 | RMI1           |                 |                 |
| 212478 at    | RMND5A      | 0.613158      | 1.455154512 | RMND5A         |                 | RMND5A          |
| 241343 at    | RNASEH1     | -0.762860667  | 0           | RNASEH1        |                 |                 |
| 221287 at    | RNASEL      | 1.383406667   | 0           |                |                 |                 |
| 229285 at    | RNASEL      | 1.20003       | 0.796301331 |                |                 |                 |
| 212724 at    | RND3        | -1.170987     | 0           | RND3           | RND3            | RND3            |
| 208924 at    | RNF11       | 0.634436167   | 3.701646186 |                |                 |                 |
| 1565544 at   | RNF141      | 0.9352595     | 3.701646186 |                | RNF141          |                 |
| 228153 at    | RNF144B     | 0.948850167   | 0           |                |                 |                 |
| 235549 at    | RNF144B     | 1.207158167   | 0           |                |                 |                 |
| 239012 at    | RNF144B     | 1.2224485     | 0           |                |                 |                 |
| 239899 at    | RNF145      | -0.550807333  | 3.029425085 |                |                 |                 |
| 1553127 a at | RNF168      | 0.606013333   | 0.796301331 |                |                 |                 |
| 220985 s at  | RNF170      | 1.065640667   | 1.123589586 |                |                 |                 |
| 226104 at    | RNF170      | 0.503445333   | 3.701646186 |                |                 |                 |
| 242985 x at  | RNF180      | 1.4435385     | 0           |                |                 |                 |
| 230662 at    | RNF187      | 1.035835167   | 0.137080273 |                |                 |                 |
| 213038 at    | RNF19B      | 0.746033167   | 0           |                |                 |                 |
| 36564 at     | RNF19B      | 0.6451505     | 0.230227638 |                |                 |                 |
| 227114 at    | RNF214      | 0.610333667   | 0.796301331 |                |                 |                 |
| 235492 at    | RNF217      | 0.958755      | 0           |                |                 |                 |
| 204668 at    | RNF24       | 0.616795167   | 0.796301331 |                |                 |                 |
| 203286 at    | RNF44       | 0.566009333   | 2.499099453 |                |                 |                 |
| 221194 s at  | RNFT1       | 1.062165667   | 0           |                |                 | RNFT1           |
| 221908 at    | RNFT2       | 1.120356833   | 1.455154512 |                |                 |                 |
| 221909 at    | RNFT2       | 0.928233333   | 1.455154512 |                |                 |                 |



| Probe Set ID | Gene Symbol         | miR-128-miRNC | q value (%) | miR-128 tgts_M | miR-128 tgts_TS | miR-128 tgts_PT |
|--------------|---------------------|---------------|-------------|----------------|-----------------|-----------------|
| 203504_s_at  | ABCA1               | -1.2890325    | 0           | ABCA1          | ABCA1           | ABCA1           |
| 223824_at    | RNLS                | 0.518698      | 3.701646186 |                |                 |                 |
| 226975_at    | RNPC3               | 0.50113       | 1.123589586 |                |                 |                 |
| 218291_at    | ROBLD3              | -0.5242325    | 3.029425085 |                |                 |                 |
| 219550_at    | ROBO3               | 0.685487      | 0           |                |                 |                 |
| 202762_at    | ROCK2               | -0.620832333  | 3.701646186 |                |                 |                 |
| 205805_s_at  | ROR1                | 1.5503005     | 0           | ROR1           |                 |                 |
| 210426_x_at  | RORA                | 1.249375667   | 0           |                |                 |                 |
| 210479_s_at  | RORA                | 1.155515333   | 0           |                |                 |                 |
| 226682_at    | RORA                | 1.276724      | 0.05396551  |                |                 |                 |
| 235567_at    | RORA                | 0.755214833   | 1.810509752 |                |                 |                 |
| 236266_at    | RORA                | 0.896025333   | 1.455154512 |                |                 |                 |
| 1557984_s_at | RPAP3               | 0.666058333   | 0.550502435 |                |                 |                 |
| 218842_at    | RPAP3               | 0.808395333   | 0.230227638 |                |                 |                 |
| 207624_s_at  | RPGR                | 0.885616      | 0.230227638 | RPGR           |                 |                 |
| 214744_s_at  | RPL23               | -0.941844833  | 0.230227638 |                |                 |                 |
| 223707_at    | RPL27A              | -0.852355167  | 1.455154512 |                |                 |                 |
| 224763_at    | RPL37               | 0.630891333   | 0.137080273 | RPL37          |                 |                 |
| 224767_at    | RPL37               | 0.836067167   | 0.796301331 | RPL37          |                 |                 |
| 210035_s_at  | RPL5 ///<br>SNORA66 | -0.785397833  | 1.455154512 |                |                 |                 |
| 227722_at    | RPS23               | 0.547763      | 1.455154512 |                |                 |                 |
| 1555878_at   | RPS24               | 1.196675833   | 0           | RPS24          |                 |                 |
| 226660_at    | RPS6KB1             | -0.631320667  | 1.123589586 | RPS6KB1        | RPS6KB1         |                 |
| 1566603_s_at | RPUSD3              | 0.53607       | 1.455154512 |                |                 |                 |
| 205540_s_at  | RRAGB               | 0.723603      | 1.810509752 |                |                 |                 |
| 222204_s_at  | RRN3                | 0.726771167   | 0.550502435 |                |                 |                 |
| 219037_at    | RRP15               | 0.543524667   | 3.701646186 |                |                 |                 |
| 214583_at    | RSC1A1              | 0.793487167   | 3.029425085 |                |                 |                 |
| 225780_at    | RSC1A1              | 0.656382333   | 3.029425085 |                |                 |                 |
| 213750_at    | RSL1D1              | 0.724651667   | 3.029425085 | RSL1D1         |                 |                 |
| 223713_at    | RSPH3               | 0.931953333   | 0           |                |                 |                 |
| 225150_s_at  | RTKN                | 0.674969      | 0.550502435 | RTKN           |                 |                 |
| 210222_s_at  | RTN1                | 0.540665167   | 1.810509752 |                |                 |                 |
| 1557388_at   | RTTN                | -0.943568667  | 3.701646186 | RTTN           |                 |                 |
| 1559946_s_at | RUVBL2              | -0.657723833  | 1.810509752 | RUVBL2         | RUVBL2          |                 |
| 201459_at    | RUVBL2              | -0.7510735    | 2.499099453 | RUVBL2         | RUVBL2          |                 |
| 222614_at    | RWDD2B              | 0.521712      | 1.123589586 |                |                 |                 |
| 217728_at    | S100A6              | -0.781168     | 1.455154512 |                |                 |                 |
| 230464_at    | S1PR5               | 0.749063      | 3.029425085 |                |                 |                 |
| 208607_s_at  | SAA1 ///<br>SAA2    | -1.3409285    | 0.05396551  |                |                 |                 |
| 214456_x_at  | SAA1 ///<br>SAA2    | -1.315243     | 0.230227638 |                |                 |                 |
| 238673_at    | SAMD12              | -0.611219     | 0.796301331 | SAMD12         | SAMD12          |                 |
| 242062_at    | SAMD8               | 0.753615      | 0.230227638 |                |                 |                 |
| 228531_at    | SAMD9               | 0.806537      | 0.796301331 |                |                 |                 |
| 226603_at    | SAMD9L              | 0.575068333   | 1.455154512 | SAMD9L         |                 |                 |
| 235643_at    | SAMD9L              | 0.9294115     | 0.796301331 | SAMD9L         |                 |                 |
| 204502_at    | SAMHD1              | 0.97233       | 0.05396551  |                |                 |                 |
| 201542_at    | SAR1A               | -0.800056667  | 0.230227638 | SAR1A          | SAR1A           |                 |

| Probe Set ID | Gene Symbol | miR-128-miRNC | q value (%) | miR-128 tgts_M | miR-128 tgts_TS | miR-128 tgts_PT |
|--------------|-------------|---------------|-------------|----------------|-----------------|-----------------|
| 203504 s at  | ABCA1       | -1.2890325    | 0           | ABCA1          | ABCA1           | ABCA1           |
| 201543 s at  | SAR1A       | -0.55528      | 3.701646186 | SAR1A          | SAR1A           |                 |
| 210790 s at  | SAR1A       | -0.864059667  | 0.137080273 | SAR1A          | SAR1A           |                 |
| 203455 s at  | SAT1        | 0.70527       | 1.455154512 |                |                 |                 |
| 210592 s at  | SAT1        | 0.57232       | 1.455154512 |                |                 |                 |
| 213988 s at  | SAT1        | 0.830095333   | 0           |                |                 |                 |
| 203408 s at  | SATB1       | 0.745767      | 0.137080273 | SATB1          |                 |                 |
| 215064 at    | SC5DL       | 0.839902667   | 1.123589586 | SC5DL          |                 |                 |
| 209741 x at  | SCAPER      | 1.249410333   | 0.393887585 |                |                 |                 |
| 216399 s at  | SCAPER      | 1.005386167   | 0.796301331 |                |                 |                 |
| 1555021 a at | SCARF1      | 0.612726167   | 3.029425085 |                |                 |                 |
| 206995 x at  | SCARF1      | 0.676910333   | 0           |                |                 |                 |
| 224901 at    | SCD5        | 0.561081333   | 1.123589586 | SCD5           |                 |                 |
| 1554921 a at | SEEL        | 1.0900065     | 2.499099453 |                |                 |                 |
| 226923 at    | SCFD2       | 0.773794333   | 0           |                |                 |                 |
| 203889 at    | SCG5        | -0.899345667  | 0           |                |                 |                 |
| 223341 s at  | SCOC        | 0.538359333   | 3.029425085 |                |                 |                 |
| 224786 at    | SCOC        | 0.727369167   | 2.499099453 |                |                 |                 |
| 212556 at    | SCRIB       | -0.941514     | 2.499099453 |                |                 |                 |
| 219234 x at  | SCRN3       | 0.559715833   | 3.701646186 |                |                 |                 |
| 221220 s at  | SCYL2       | 0.549709333   | 1.455154512 |                |                 |                 |
| 218711 s at  | SDPR        | -2.230168333  | 0           |                |                 |                 |
| 223299 at    | SEC11C      | 0.698121167   | 0.393887585 |                |                 |                 |
| 201582 at    | SEC23B      | 0.680719667   | 3.701646186 |                |                 |                 |
| 212902 at    | SEC24A      | 0.637486      | 1.123589586 | SEC24A         | SEC24A          |                 |
| 244841 at    | SEC24A      | 1.052907167   | 0           | SEC24A         | SEC24A          |                 |
| 202375 at    | SEC24D      | 0.624794      | 3.029425085 |                |                 |                 |
| 209889 at    | SEC31B      | 0.526237      | 3.701646186 |                |                 |                 |
| 217716 s at  | SEC61A1     | -0.926416833  | 0.796301331 | SEC61A1        | SEC61A1         | SEC61A1         |
| 222385 x at  | SEC61A1     | -0.976724833  | 0.393887585 | SEC61A1        | SEC61A1         | SEC61A1         |
| 218265 at    | SECISBP2    | 0.8263025     | 3.701646186 |                |                 |                 |
| 224250 s at  | SECISBP2    | 1.073666667   | 0           |                |                 |                 |
| 221931 s at  | SEH1L       | 0.593704333   | 3.701646186 | SEH1L          |                 |                 |
| 224888 at    | SELI        | 0.8612305     | 0           |                |                 |                 |
| 223209 s at  | SELS        | 0.814425      | 0.05396551  |                |                 |                 |
| 206941 x at  | SEMA3E      | 1.478296167   | 0           | SEMA3E         |                 |                 |
| 46665 at     | SEMA4C      | 0.7806775     | 3.029425085 |                |                 |                 |
| 210124 x at  | SEMA4F      | 0.7301765     | 1.455154512 | SEMA4F         |                 |                 |
| 228660 x at  | SEMA4F      | 0.8378555     | 0.137080273 | SEMA4F         |                 |                 |
| 208939 at    | SEPHS1      | -0.558337333  | 0           |                |                 |                 |
| 1553167 a at | SEPSECS     | 0.807300833   | 0.230227638 | SEPSECS        |                 |                 |
| 231730 at    | SEPSECS     | 0.764385333   | 1.123589586 | SEPSECS        |                 |                 |
| 235516 at    | SEPSECS     | 0.762840833   | 0.796301331 | SEPSECS        |                 |                 |
| 212413 at    | SEPT6       | 0.529223      | 3.701646186 |                |                 |                 |
| 244508 at    | SEPT7       | -0.988346167  | 0.137080273 | SEPT7          |                 |                 |
| 200969 at    | SERP1       | 0.968447333   | 0           |                |                 |                 |
| 200970 s at  | SERP1       | 0.903086      | 0.230227638 |                |                 |                 |
| 235475 at    | SERP1       | 0.517134333   | 1.810509752 |                |                 |                 |
| 202833 s at  | SERPINA1    | 1.775856833   | 0           |                |                 |                 |
| 211429 s at  | SERPINA1    | 1.337586833   | 0.550502435 |                |                 |                 |
| 1568765 at   | SERPINE1    | 1.155627333   | 0.796301331 |                |                 |                 |

| Probe Set ID | Gene Symbol | miR-128-miRNC | q value (%) | miR-128 tgts_M | miR-128 tgts_TS | miR-128 tgts_PT |
|--------------|-------------|---------------|-------------|----------------|-----------------|-----------------|
| 203504 s at  | ABCA1       | -1.2890325    | 0           | ABCA1          | ABCA1           | ABCA1           |
| 202627 s at  | SERPINE1    | 0.612526667   | 1.123589586 |                |                 |                 |
| 202628 s at  | SERPINE1    | 0.787611667   | 0.05396551  |                |                 |                 |
| 207714 s at  | SERPINH1    | 0.725395      | 0.796301331 | SERPINH1       |                 |                 |
| 235683 at    | SESN3       | 0.939190833   | 0.05396551  |                |                 |                 |
| 235684 s at  | SESN3       | 0.735329667   | 0.550502435 |                |                 |                 |
| 219482 at    | SETD4       | 0.519216667   | 1.455154512 |                |                 |                 |
| 244653 at    | SETD7       | -0.765000833  | 0.393887585 | SETD7          | SETD7           |                 |
| 213370 s at  | SFMBT1      | 1.363956333   | 0           | SFMBT1         |                 |                 |
| 1553581 s at | SFRS12IP1   | 0.607704333   | 0.137080273 |                |                 |                 |
| 217608 at    | SFRS12IP1   | 0.613699167   | 2.499099453 |                |                 |                 |
| 230375 at    | SFRS18      | 1.191120833   | 0           | SFRS18         |                 |                 |
| 238929 at    | SFRS2B      | 1.192863      | 0           |                |                 |                 |
| 1570507 at   | SFRS2IP     | 1.171926333   | 1.810509752 |                |                 | SFRS2IP         |
| 237485 at    | SFRS3       | -0.582805     | 1.810509752 |                |                 |                 |
| 239511 s at  | SFRS4       | -0.8105235    | 1.810509752 |                |                 |                 |
| 239512 at    | SFRS4       | -0.9725285    | 1.123589586 |                |                 |                 |
| 241245 at    | SFRS4       | -0.813582333  | 3.029425085 |                |                 |                 |
| 242837 at    | SFRS4       | -0.543956333  | 3.701646186 |                |                 |                 |
| 213649 at    | SFRS7       | 0.522276667   | 1.455154512 |                |                 |                 |
| 243818 at    | SFTA1P      | -0.81549      | 0           |                |                 |                 |
| 1553690 at   | SGOL1       | -1.215323     | 0           |                |                 |                 |
| 208381 s at  | SGPL1       | -0.538465     | 1.810509752 |                |                 |                 |
| 232084 at    | SGTB        | 0.852472333   | 0.796301331 |                |                 |                 |
| 201810 s at  | SH3BP5      | 0.647566667   | 0.137080273 |                |                 |                 |
| 209090 s at  | SH3GLB1     | -0.680188333  | 0.393887585 |                |                 |                 |
| 1554168 a at | SH3KBP1     | 0.639645      | 0.796301331 |                |                 |                 |
| 223082 at    | SH3KBP1     | 0.564586667   | 0.393887585 |                |                 |                 |
| 235692 at    | SH3KBP1     | 1.000907167   | 0           |                |                 |                 |
| 231823 s at  | SH3PXD2B    | -0.7521065    | 1.123589586 |                |                 |                 |
| 228461 at    | SH3RF3      | 0.8713735     | 0.230227638 |                |                 |                 |
| 220563 s at  | SHANK1      | 0.580878667   | 2.499099453 |                |                 |                 |
| 213307 at    | SHANK2      | 1.319562833   | 0           |                |                 |                 |
| 243681 at    | SHANK2      | 0.691696333   | 0.550502435 |                |                 |                 |
| 1557458 s at | SHB         | 1.107883167   | 0           |                |                 |                 |
| 204657 s at  | SHB         | 0.774834      | 1.455154512 |                |                 |                 |
| 230459 s at  | SHB         | 0.705174167   | 2.499099453 |                |                 |                 |
| 224954 at    | SHMT1       | -0.883799     | 0.05396551  |                |                 |                 |
| 224391 s at  | SIAE        | 1.236764833   | 0.05396551  |                |                 |                 |
| 209339 at    | SIAH2       | 0.869111667   | 0.05396551  |                |                 |                 |
| 215856 at    | SIGLEC15    | 0.6161        | 0.393887585 |                |                 |                 |
| 208078 s at  | SIK1        | 0.6968395     | 0.550502435 |                |                 |                 |
| 206558 at    | SIM2        | 0.543818333   | 3.029425085 |                |                 |                 |
| 211114 x at  | SIP1        | 0.633978833   | 1.123589586 |                |                 |                 |
| 211115 x at  | SIP1        | 0.6232385     | 1.810509752 |                |                 |                 |
| 1554624 a at | SIRPB1      | -0.50041      | 0.796301331 | SIRPB1         |                 |                 |
| 221562 s at  | SIRT3       | -0.595778667  | 3.029425085 |                |                 |                 |
| 231797 at    | SIX4        | 0.621904667   | 1.455154512 |                |                 |                 |
| 227165 at    | SKA3        | -0.751773333  | 0.230227638 | SKA3           |                 |                 |
| 204270 at    | SKI         | 1.207287      | 0           |                |                 |                 |
| 200711 s at  | SKP1        | -0.780598833  | 0.796301331 | SKP1           |                 |                 |

| Probe Set ID | Gene Symbol | miR-128-miRNC | q value (%) | miR-128 tgts_M | miR-128 tgts_TS | miR-128 tgts_PT |
|--------------|-------------|---------------|-------------|----------------|-----------------|-----------------|
| 203504 s at  | ABCA1       | -1.2890325    | 0           | ABCA1          | ABCA1           | ABCA1           |
| 200719 at    | SKP1        | -0.841313667  | 0.05396551  | SKP1           |                 |                 |
| 225619 at    | SLAIN1      | 0.9833475     | 0.230227638 | SLAIN1         |                 |                 |
| 224853 at    | SLAIN2      | 0.53839       | 1.455154512 |                |                 |                 |
| 224854 s at  | SLAIN2      | 0.52528       | 1.810509752 |                |                 |                 |
| 219159 s at  | SLAMF7      | 0.848677333   | 0           |                |                 |                 |
| 204404 at    | SLC12A2     | 0.769120667   | 2.499099453 |                |                 |                 |
| 225835 at    | SLC12A2     | 0.9994895     | 1.810509752 |                |                 |                 |
| 223596 at    | SLC12A6     | 0.643794667   | 0.796301331 | SLC12A6        |                 |                 |
| 202234 s at  | SLC16A1     | 0.656718333   | 1.455154512 | SLC16A1        |                 |                 |
| 213522 s at  | SLC16A3     | 0.511869333   | 1.810509752 |                |                 |                 |
| 207057 at    | SLC16A7     | 0.630545167   | 2.499099453 |                |                 |                 |
| 221041 s at  | SLC17A5     | 0.8117605     | 1.123589586 | SLC17A5        |                 |                 |
| 205857 at    | SLC18A2     | 0.602966      | 1.810509752 |                |                 |                 |
| 212810 s at  | SLC1A4      | 0.648430833   | 2.499099453 |                |                 |                 |
| 218136 s at  | SLC25A37    | 0.609259667   | 0.550502435 | SLC25A37       |                 |                 |
| 222529 at    | SLC25A37    | 0.583514667   | 3.029425085 | SLC25A37       |                 |                 |
| 226179 at    | SLC25A37    | 1.238951667   | 0           | SLC25A37       |                 |                 |
| 242335 at    | SLC25A37    | 0.8448025     | 0.550502435 | SLC25A37       |                 |                 |
| 212683 at    | SLC25A44    | 0.713042667   | 2.499099453 |                |                 |                 |
| 1552694 at   | SLC2A13     | 0.940679667   | 1.123589586 |                |                 |                 |
| 1552695 a at | SLC2A13     | 1.004944833   | 1.810509752 |                |                 |                 |
| 227176 at    | SLC2A13     | 1.030843667   | 1.810509752 |                |                 |                 |
| 234561 at    | SLC2A13     | 0.894628333   | 1.810509752 |                |                 |                 |
| 1555500 s at | SLC2A4RG    | 0.5420605     | 1.455154512 |                |                 |                 |
| 212907 at    | SLC30A1     | 0.6553525     | 3.701646186 |                |                 |                 |
| 228181 at    | SLC30A1     | 0.679873      | 1.810509752 |                |                 |                 |
| 1555334 s at | SLC30A5     | 0.507325      | 0.796301331 |                |                 |                 |
| 218989 x at  | SLC30A5     | 0.58533       | 1.455154512 |                |                 |                 |
| 226217 at    | SLC30A7     | 1.315987833   | 0.05396551  |                |                 |                 |
| 226601 at    | SLC30A7     | 0.8121215     | 0.05396551  |                |                 |                 |
| 239596 at    | SLC30A7     | 0.827719      | 1.123589586 |                |                 |                 |
| 229500 at    | SLC30A9     | 0.902659167   | 1.810509752 |                |                 |                 |
| 203164 at    | SLC33A1     | 0.894760333   | 0           |                |                 |                 |
| 203165 s at  | SLC33A1     | 0.642718667   | 1.810509752 |                |                 |                 |
| 203306 s at  | SLC35A1     | 0.526893667   | 1.123589586 | SLC35A1        |                 |                 |
| 206770 s at  | SLC35A3     | 0.688496667   | 1.810509752 |                |                 |                 |
| 240335 at    | SLC35F5     | -1.115985     | 0           | SLC35F5        |                 |                 |
| 234978 at    | SLC36A4     | -1.105921667  | 0           |                |                 |                 |
| 223304 at    | SLC37A3     | 0.537328667   | 0.550502435 |                |                 |                 |
| 214830 at    | SLC38A6     | -0.940375667  | 0.05396551  | SLC38A6        |                 |                 |
| 227046 at    | SLC39A11    | -0.643368333  | 0.137080273 | SLC39A11       | SLC39A11        | SLC39A11        |
| 209267 s at  | SLC39A8     | 0.7559815     | 0.796301331 |                |                 |                 |
| 223798 at    | SLC41A2     | 1.629764      | 0           |                |                 |                 |
| 235299 at    | SLC41A2     | 1.644309333   | 0.05396551  |                |                 |                 |
| 243894 at    | SLC41A2     | 1.606067833   | 0           |                |                 |                 |
| 219175 s at  | SLC41A3     | 0.769987667   | 2.499099453 |                |                 |                 |
| 224931 at    | SLC41A3     | 1.168822333   | 0           |                |                 |                 |
| 228486 at    | SLC44A1     | 1.331094167   | 2.499099453 |                |                 |                 |
| 1552779 a at | SLC44A5     | 1.561366833   | 0           |                |                 |                 |
| 1569112 at   | SLC44A5     | 1.811000167   | 0           |                |                 |                 |

| Probe Set ID | Gene Symbol | miR-128-miRNC | q value (%) | miR-128 tgts_M | miR-128 tgts_TS | miR-128 tgts_PT |
|--------------|-------------|---------------|-------------|----------------|-----------------|-----------------|
| 203504 s at  | ABCA1       | -1.2890325    | 0           | ABCA1          | ABCA1           | ABCA1           |
| 242030 at    | SLC4A1AP    | 0.529833833   | 3.029425085 |                |                 |                 |
| 207603 at    | SLC4A7      | 1.199155      | 0.05396551  |                |                 |                 |
| 207604 s at  | SLC4A7      | 0.963056667   | 0           |                |                 |                 |
| 209884 s at  | SLC4A7      | 0.766845333   | 0.393887585 |                |                 |                 |
| 210286 s at  | SLC4A7      | 0.8087285     | 3.029425085 |                |                 |                 |
| 206376 at    | SLC6A15     | 0.604586667   | 3.029425085 |                |                 |                 |
| 201195 s at  | SLC7A5      | -1.1912105    | 0           |                |                 |                 |
| 232057 at    | SLC7A6OS    | 0.535573333   | 1.123589586 |                |                 |                 |
| 1552671 a at | SLC9A7      | 0.774740833   | 0.796301331 |                |                 |                 |
| 219911 s at  | SLCO4A1     | 0.527905667   | 1.123589586 | SLCO4A1        |                 |                 |
| 214930 at    | SLITRK5     | -0.502442333  | 1.123589586 |                |                 |                 |
| 226563 at    | SMAD2       | -0.671464333  | 0.796301331 |                | SMAD2           |                 |
| 235598 at    | SMAD2       | -0.668606833  | 2.499099453 |                | SMAD2           |                 |
| 218284 at    | SMAD3       | 0.549375      | 1.455154512 |                |                 |                 |
| 225282 at    | SMAP2       | 0.532001167   | 3.701646186 |                |                 |                 |
| 212167 s at  | SMARCB1     | 0.820546833   | 0.796301331 | SMARCB1        |                 |                 |
| 201320 at    | SMARCC2     | 0.603422      | 3.701646186 |                |                 |                 |
| 203183 s at  | SMARCD1     | 0.716861167   | 1.810509752 |                |                 |                 |
| 1555677 s at | SMC1A       | 0.956876667   | 0           |                |                 |                 |
| 201589 at    | SMC1A       | 0.615646167   | 1.455154512 |                |                 |                 |
| 201664 at    | SMC4        | -0.52702      | 1.455154512 |                |                 |                 |
| 215623 x at  | SMC4        | -1.067805833  | 0           |                |                 |                 |
| 204466 s at  | SNCA        | 1.12192       | 0           |                |                 |                 |
| 207827 x at  | SNCA        | 0.844171667   | 0           |                |                 |                 |
| 211546 x at  | SNCA        | 1.0241        | 0           |                |                 |                 |
| 237833 s at  | SNCAIP      | -0.639992     | 1.810509752 |                |                 |                 |
| 1564911 at   | SNHG4       | -0.5450645    | 3.029425085 |                |                 |                 |
| 219409 at    | SNIP1       | 0.778738      | 1.810509752 |                |                 |                 |
| 1558081 at   | SNORA65     | 0.584008167   | 3.029425085 |                |                 |                 |
| 212440 at    | SNRNP27     | -0.5742125    | 3.029425085 | SNRNP27        |                 |                 |
| 215905 s at  | SNRNP40     | -0.547254167  | 3.029425085 |                |                 |                 |
| 208821 at    | SNRPB       | -0.5988445    | 0.550502435 |                |                 |                 |
| 205315 s at  | SNTB2       | 0.676255667   | 2.499099453 |                |                 |                 |
| 227312 at    | SNTB2       | 0.647428333   | 1.455154512 |                |                 |                 |
| 220140 s at  | SNX11       | -0.824539667  | 1.455154512 |                |                 |                 |
| 224684 at    | SNX12       | -0.678705     | 0.393887585 |                |                 |                 |
| 1555388 s at | SNX25       | 0.590326667   | 1.123589586 | SNX25          |                 |                 |
| 227408 s at  | SNX25       | 0.658667      | 1.810509752 | SNX25          |                 |                 |
| 226249 at    | SNX30       | -0.676332333  | 1.455154512 |                |                 |                 |
| 217792 at    | SNX5        | -0.732396833  | 0.137080273 |                |                 |                 |
| 223028 s at  | SNX9        | 0.547081667   | 1.123589586 |                |                 |                 |
| 218974 at    | SOBP        | 0.922740833   | 1.810509752 | SOBP           |                 |                 |
| 203373 at    | SOCS2       | -0.718898     | 0.550502435 |                |                 |                 |
| 209648 x at  | SOCS5       | 0.58481       | 2.499099453 | SOCS5          |                 |                 |
| 214462 at    | SOCS6       | 0.674846167   | 3.029425085 | SOCS6          | SOCS6           | SOCS6           |
| 227542 at    | SOCS6       | 0.5960395     | 2.499099453 | SOCS6          | SOCS6           | SOCS6           |
| 214015 at    | SOCS7       | 1.4271755     | 0           |                |                 |                 |
| 226572 at    | SOCS7       | 1.343468      | 0           |                |                 |                 |
| 228662 at    | SOCS7       | 1.4170485     | 0           |                |                 |                 |
| 212560 at    | SORL1       | 0.847322833   | 3.029425085 | SORL1          |                 |                 |

| Probe Set ID | Gene Symbol | miR-128-miRNC | q value (%) | miR-128 tgts_M | miR-128 tgts_TS | miR-128 tgts_PT |
|--------------|-------------|---------------|-------------|----------------|-----------------|-----------------|
| 203504 s at  | ABCA1       | -1.2890325    | 0           | ABCA1          | ABCA1           | ABCA1           |
| 212797 at    | SORT1       | -0.782465333  | 0.393887585 |                |                 |                 |
| 224818 at    | SORT1       | -0.553905833  | 1.810509752 |                |                 |                 |
| 230943 at    | SOX17       | 1.081499      | 3.029425085 |                |                 |                 |
| 238285 at    | SOX5        | 1.104465167   | 0.796301331 |                |                 |                 |
| 224013 s at  | SOX7        | 0.5046145     | 0.796301331 | SOX7           | SOX7            |                 |
| 211736 at    | SP2         | 0.842449667   | 1.810509752 | SP2            | SP2             | SP2             |
| 209891 at    | SPC25       | -0.7327085    | 0.393887585 |                |                 |                 |
| 230775 s at  | SPG20       | 0.513156667   | 2.499099453 |                |                 |                 |
| 217827 s at  | SPG21       | -0.709795     | 0.05396551  | SPG21          |                 |                 |
| 1568916 at   | SPIRE2      | 1.055942667   | 2.499099453 |                |                 |                 |
| 202363 at    | SPOCK1      | 1.476264167   | 0           |                |                 |                 |
| 209436 at    | SPON1       | -0.903211667  | 0.550502435 |                |                 |                 |
| 209437 s at  | SPON1       | -0.950896333  | 1.455154512 |                |                 |                 |
| 213994 s at  | SPON1       | -0.682259333  | 2.499099453 |                |                 |                 |
| 1568574 x at | SPP1        | 0.563135667   | 3.029425085 | SPP1           |                 |                 |
| 204011 at    | SPRY2       | 0.551435      | 1.455154512 | SPRY2          | SPRY2           | SPRY2           |
| 221489 s at  | SPRY4       | 0.772953333   | 0           |                |                 |                 |
| 226075 at    | SPSB1       | 0.674888333   | 1.123589586 |                |                 |                 |
| 214856 at    | SPTBN1      | -0.627543333  | 1.810509752 | SPTBN1         | SPTBN1          |                 |
| 215918 s at  | SPTBN1      | -0.666427833  | 1.455154512 | SPTBN1         | SPTBN1          |                 |
| 203127 s at  | SPTLC2      | -0.789832167  | 0.393887585 |                |                 |                 |
| 203128 at    | SPTLC2      | -0.6100975    | 1.455154512 |                |                 |                 |
| 216202 s at  | SPTLC2      | -0.6639135    | 1.123589586 |                |                 |                 |
| 225095 at    | SPTLC2      | -0.8584805    | 0           |                |                 |                 |
| 220456 at    | SPTLC3      | -0.672413     | 1.455154512 | SPTLC3         |                 |                 |
| 1557352 at   | SQLE        | 0.5330605     | 3.701646186 |                |                 |                 |
| 213324 at    | SRC         | 0.796088667   | 0.137080273 |                |                 |                 |
| 1556202 at   | SRGAP2      | -0.826095     | 3.029425085 | SRGAP2         | SRGAP2          |                 |
| 208920 at    | SRI         | -0.728147167  | 0.550502435 | SRI            |                 |                 |
| 208801 at    | SRP72       | -0.56917      | 1.123589586 | SRP72          | SRP72           |                 |
| 218140 x at  | SRPRB       | 0.602136667   | 0.550502435 |                |                 |                 |
| 222532 at    | SRPRB       | 0.575156667   | 0.796301331 |                |                 |                 |
| 202816 s at  | SS18        | -0.737588333  | 0.137080273 | SS18           | SS18            |                 |
| 202817 s at  | SS18        | -0.506768333  | 3.029425085 | SS18           | SS18            |                 |
| 209954 x at  | SS18        | -0.8286185    | 0.137080273 | SS18           | SS18            |                 |
| 216684 s at  | SS18        | -0.878376667  | 0.230227638 | SS18           | SS18            |                 |
| 217051 s at  | SS18        | -0.551445167  | 1.123589586 | SS18           | SS18            |                 |
| 226080 at    | SSH2        | 0.890498      | 0.230227638 |                |                 |                 |
| 204963 at    | SSPN        | 1.259351833   | 0.05396551  |                |                 |                 |
| 208666 s at  | ST13        | -0.962450667  | 0.796301331 | ST13           |                 |                 |
| 208667 s at  | ST13        | -0.8504375    | 0           | ST13           |                 |                 |
| 225033 at    | ST3GAL1     | 0.708831667   | 0.137080273 |                |                 |                 |
| 225034 at    | ST3GAL1     | 0.629014333   | 2.499099453 |                |                 |                 |
| 210942 s at  | ST3GAL6     | -0.628987     | 1.810509752 |                |                 |                 |
| 214970 s at  | ST6GAL1     | 0.656162167   | 1.455154512 |                |                 |                 |
| 214971 s at  | ST6GAL1     | 0.533587333   | 1.455154512 |                |                 |                 |
| 235334_at    | ST6GALNA C3 | 1.667912      | 3.029425085 | ST6GALNAC3     | ST6GALNA C3     | ST6GALNA C3     |
| 207524 at    | ST7         | 0.709685667   | 1.455154512 |                |                 |                 |
| 206925 at    | ST8SIA4     | 0.921151667   | 0.393887585 | ST8SIA4        |                 |                 |

| Probe Set ID | Gene Symbol | miR-128-miRNC | q value (%) | miR-128 tgts_M | miR-128 tgts_TS | miR-128 tgts_PT |
|--------------|-------------|---------------|-------------|----------------|-----------------|-----------------|
| 203504 s at  | ABCA1       | -1.2890325    | 0           | ABCA1          | ABCA1           | ABCA1           |
| 221191 at    | STAG3L1     | -0.771516833  | 1.810509752 | STAG3L1        |                 |                 |
| 208194 s at  | STAM2       | 0.566896667   | 0.550502435 | STAM2          |                 |                 |
| 209649 at    | STAM2       | 0.868212167   | 0           | STAM2          |                 |                 |
| 215044 s at  | STAM2       | 0.65217       | 1.123589586 | STAM2          |                 |                 |
| 228254 at    | STAM2       | 1.170690667   | 0           | STAM2          |                 |                 |
| 242569 at    | STAM2       | 1.264610167   | 0           | STAM2          |                 |                 |
| 227606 s at  | STAMBPL1    | 0.6176295     | 0.137080273 |                |                 |                 |
| 227607 at    | STAMBPL1    | 0.5176875     | 1.810509752 |                |                 |                 |
| 223103 at    | STARD10     | 1.957563      | 0           |                |                 |                 |
| 208991 at    | STAT3       | 0.67012       | 0           |                |                 |                 |
| 208992 s at  | STAT3       | 0.571466667   | 1.455154512 |                |                 |                 |
| 225289 at    | STAT3       | 0.619959      | 1.810509752 |                |                 |                 |
| 203010 at    | STAT5A      | 0.981746667   | 0.137080273 |                |                 |                 |
| 212549 at    | STAT5B      | 0.5691725     | 0.137080273 |                |                 |                 |
| 204595 s at  | STC1        | 1.181283833   | 0           |                |                 |                 |
| 204596 s at  | STC1        | 1.506826333   | 0           |                |                 |                 |
| 204597 x at  | STC1        | 1.377281333   | 0           |                |                 |                 |
| 225871 at    | STEAP2      | 0.8292155     | 0.796301331 | STEAP2         |                 |                 |
| 225649 s at  | STK35       | 0.605697      | 1.123589586 | STK35          | STK35           | STK35           |
| 200783 s at  | STMN1       | -0.7810655    | 3.701646186 |                |                 |                 |
| 222557 at    | STMN3       | -0.754426667  | 1.810509752 |                |                 |                 |
| 223245 at    | STRBP       | 0.895879333   | 0           |                |                 |                 |
| 223246 s at  | STRBP       | 0.724576667   | 1.123589586 |                |                 |                 |
| 233252 s at  | STRBP       | 0.882638667   | 0.137080273 |                |                 |                 |
| 203767 s at  | STS         | 0.810095333   | 2.499099453 |                |                 |                 |
| 203770 s at  | STS         | 0.799686333   | 0.230227638 |                |                 |                 |
| 227625 s at  | STUB1       | -0.619897333  | 2.499099453 |                |                 |                 |
| 212111 at    | STX12       | 1.1006845     | 0.230227638 |                |                 |                 |
| 212112 s at  | STX12       | 0.8854855     | 0.05396551  |                |                 |                 |
| 207346 at    | STX2        | -0.678603833  | 1.455154512 |                |                 |                 |
| 216985 s at  | STX3        | 0.500682      | 2.499099453 | STX3           |                 |                 |
| 1552618 at   | STX6        | 0.522208333   | 2.499099453 |                |                 |                 |
| 212799 at    | STX6        | 1.096709833   | 0.137080273 |                |                 |                 |
| 212800 at    | STX6        | 0.627236333   | 0.796301331 |                |                 |                 |
| 212631 at    | STX7        | 0.563325      | 1.455154512 | STX7           |                 |                 |
| 202260 s at  | STXBP1      | 0.679116667   | 0.393887585 |                |                 |                 |
| 235180 at    | STYX        | 0.560924333   | 3.701646186 | STYX           |                 |                 |
| 222591 at    | STYXL1      | 0.863884667   | 3.029425085 |                |                 |                 |
| 232353 s at  | STYXL1      | 0.715007333   | 1.810509752 |                |                 |                 |
| 233982 x at  | STYXL1      | 0.752477333   | 2.499099453 |                |                 |                 |
| 221727 at    | SUB1        | -0.729936167  | 1.123589586 |                |                 |                 |
| 224974 at    | SUDS3       | 0.5216065     | 3.701646186 |                |                 |                 |
| 222749 at    | SUFU        | 0.7016565     | 3.029425085 | SUFU           |                 |                 |
| 226850 at    | SUMF1       | -2.200779     | 0           | SUMF1          |                 |                 |
| 201483 s at  | SUPT4H1     | 0.6123355     | 1.810509752 |                |                 |                 |
| 225038 s at  | SURF6       | 0.6331025     | 1.810509752 |                |                 |                 |
| 214954 at    | SUSD5       | 0.668346667   | 1.810509752 |                |                 |                 |
| 218619 s at  | SUV39H1     | -0.8109265    | 3.701646186 |                |                 |                 |
| 212287 at    | SUZ12       | -0.890667333  | 1.810509752 | SUZ12          | SUZ12           |                 |
| 230285 at    | SVIP        | 0.514023333   | 0.550502435 | SVIP           |                 |                 |

| Probe Set ID | Gene Symbol                    | miR-128-miRNC | q value (%) | miR-128 tgts_M | miR-128 tgts_TS | miR-128 tgts_PT |
|--------------|--------------------------------|---------------|-------------|----------------|-----------------|-----------------|
| 203504 s at  | ABCA1                          | -1.2890325    | 0           | ABCA1          | ABCA1           | ABCA1           |
| 209307 at    | SWAP70                         | 0.632659667   | 2.499099453 | SWAP70         |                 |                 |
| 221276 s at  | SYNC                           | -0.658555833  | 1.455154512 |                |                 |                 |
| 1558392 at   | SYNE2                          | -0.730457667  | 0           | SYNE2          |                 |                 |
| 202761 s at  | SYNE2                          | -0.504632     | 3.029425085 | SYNE2          |                 |                 |
| 242774 at    | SYNE2                          | -0.906810333  | 0.05396551  | SYNE2          |                 |                 |
| 243841 at    | SYNE2                          | -0.635974167  | 0.796301331 | SYNE2          |                 |                 |
| 210612 s at  | SYNJ2                          | 0.844315      | 0           | SYNJ2          |                 |                 |
| 1555052 a at | SYT9                           | 1.4037735     | 0.05396551  | SYT9           |                 |                 |
| 220613 s at  | SYTL2                          | 1.029320667   | 1.810509752 |                |                 |                 |
| 238423 at    | SYTL3                          | 0.8480625     | 3.029425085 |                |                 |                 |
| 227703 s at  | SYTL4                          | 0.521606333   | 1.455154512 | SYTL4          |                 |                 |
| 236248 x at  | TADA2B                         | 0.991923167   | 0           |                |                 |                 |
| 209938 at    | TADA2L                         | 0.715646167   | 1.123589586 |                |                 |                 |
| 210537 s at  | TADA2L                         | 0.829723167   | 0.550502435 |                |                 |                 |
| 215273 s at  | TADA3L                         | 0.809377667   | 0.393887585 |                |                 |                 |
| 205966 at    | TAF13                          | 0.5609        | 1.123589586 |                |                 |                 |
| 227884 at    | TAF15                          | -0.687205167  | 0.393887585 |                |                 |                 |
| 227891 s at  | TAF15                          | -0.584871833  | 1.810509752 |                |                 |                 |
| 234168 at    | TAF15                          | -0.755754833  | 0.137080273 |                |                 |                 |
| 235154 at    | TAF3                           | 0.613657833   | 3.029425085 |                |                 |                 |
| 216226 at    | TAF4B                          | 0.647391667   | 0.137080273 |                |                 |                 |
| 210294 at    | TAPBP                          | 0.590009833   | 2.499099453 |                |                 |                 |
| 218747 s at  | TAPBPL                         | 0.706608333   | 0.393887585 |                |                 |                 |
| 221264 s at  | TARDBP                         | -0.524774667  | 1.455154512 |                |                 |                 |
| 217374_x_at  | TARP ///<br>TRGV3 ///<br>TRGV5 | 1.888488167   | 0.230227638 |                |                 |                 |
| 240206 at    | TARS                           | 0.510187333   | 0.550502435 |                |                 |                 |
| 227611 at    | TARSL2                         | 1.103340333   | 1.123589586 | TARSL2         |                 |                 |
| 234042 at    | TAS2R45                        | -0.969981667  | 0.796301331 |                |                 |                 |
| 234108 at    | TAS2R45                        | -0.686065833  | 2.499099453 |                |                 |                 |
| 219443 at    | TASP1                          | 0.961827667   | 0           | TASP1          |                 |                 |
| 223231 at    | TATDN1                         | 0.537768333   | 1.455154512 |                |                 |                 |
| 1568713 a at | TBC1D1                         | 0.705231      | 0.550502435 | TBC1D1         |                 |                 |
| 1569566 at   | TBC1D1                         | 0.650726333   | 3.029425085 | TBC1D1         |                 |                 |
| 222173 s at  | TBC1D2                         | -0.8869435    | 1.123589586 |                |                 |                 |
| 226409 at    | TBC1D20                        | 0.674587667   | 0.550502435 |                |                 |                 |
| 226664 at    | TBC1D20                        | 0.694756667   | 0.550502435 |                |                 |                 |
| 227908 at    | TBC1D24                        | 0.892021333   | 2.499099453 |                |                 |                 |
| 212796 s at  | TBC1D2B                        | 0.737558833   | 2.499099453 |                |                 |                 |
| 219771 at    | TBC1D8B                        | 0.875430667   | 0.230227638 | TBC1D8B        |                 |                 |
| 227395 at    | TBCEL                          | 0.751352667   | 2.499099453 |                |                 |                 |
| 231997 at    | TBCEL                          | 1.112826      | 0.796301331 |                |                 |                 |
| 233633 at    | TBL1XR1                        | -0.916004333  | 2.499099453 |                |                 |                 |
| 212685 s at  | TBL2                           | 0.5223235     | 2.499099453 |                |                 |                 |
| 208398 s at  | TBPL1                          | 0.519806667   | 0.550502435 |                |                 |                 |
| 226318 at    | TBRG1                          | 0.979702167   | 0.230227638 |                |                 |                 |
| 219682 s at  | TBX3                           | 0.814511333   | 1.455154512 | TBX3           |                 |                 |
| 225544 at    | TBX3                           | 0.954022667   | 1.455154512 | TBX3           |                 |                 |
| 226388 at    | TCEA3                          | 0.614503667   | 3.029425085 |                |                 |                 |



| Probe Set ID | Gene Symbol                    | miR-128-miRNC | q value (%) | miR-128 tgts_M | miR-128 tgts_TS | miR-128 tgts_PT |
|--------------|--------------------------------|---------------|-------------|----------------|-----------------|-----------------|
| 203504 s at  | ABCA1                          | -1.2890325    | 0           | ABCA1          | ABCA1           | ABCA1           |
| 200085 s at  | TCEB2                          | -0.778419     | 2.499099453 |                |                 |                 |
| 213877 x at  | TCEB2                          | -0.628985333  | 2.499099453 |                |                 |                 |
| 202384 s at  | TCOF1                          | 0.8525655     | 0.796301331 |                |                 |                 |
| 205796 at    | TCP11L1                        | 0.865305333   | 0.550502435 | TCP11L1        |                 |                 |
| 205797 s at  | TCP11L1                        | 0.824308333   | 1.455154512 | TCP11L1        |                 |                 |
| 1553861 at   | TCP11L2                        | 1.060875667   | 0.137080273 | TCP11L2        |                 |                 |
| 1565525 a at | TCP11L2                        | 0.846262333   | 1.123589586 | TCP11L2        |                 |                 |
| 228606 at    | TCTEX1D2                       | 0.544839167   | 1.455154512 |                |                 |                 |
| 213361 at    | TDRD7                          | 0.782020667   | 0.137080273 |                |                 |                 |
| 221053 s at  | TDRKH                          | 1.317947      | 0.550502435 |                |                 |                 |
| 226408 at    | TEAD2                          | 0.575376833   | 0.796301331 |                |                 |                 |
| 228670 at    | TEP1                           | 0.798329333   | 1.455154512 |                |                 |                 |
| 1569385 s at | TET2                           | 0.638883333   | 1.123589586 | TET2           | TET2            |                 |
| 214754 at    | TET3                           | 1.414618833   | 0.05396551  |                |                 |                 |
| 235542 at    | TET3                           | 1.295641333   | 0           |                |                 |                 |
| 218099 at    | TEX2                           | 0.523061      | 3.701646186 | TEX2           |                 |                 |
| 204654 s at  | TFAP2A                         | 1.255121167   | 0           | TFAP2A         |                 |                 |
| 205286 at    | TFAP2C                         | -0.8909145    | 0.796301331 |                |                 |                 |
| 242939 at    | TFDP1                          | -1.026494167  | 0           | TFDP1          |                 |                 |
| 203589 s at  | TFDP2                          | -0.505297167  | 1.123589586 |                |                 |                 |
| 226157 at    | TFDP2                          | -0.593121833  | 0.393887585 |                |                 |                 |
| 206649 s at  | TFE3                           | 0.754424667   | 1.455154512 |                |                 |                 |
| 209277 at    | TFPI2                          | 1.260664333   | 0           |                |                 |                 |
| 209278 s at  | TFPI2                          | 0.954093333   | 0           |                |                 |                 |
| 208249 s at  | TGDS                           | 0.543651833   | 1.810509752 |                |                 |                 |
| 205015 s at  | TGFA                           | 0.662998667   | 2.499099453 |                |                 |                 |
| 211258 s at  | TGFA                           | 0.679819      | 1.123589586 |                |                 |                 |
| 201042 at    | TGM2                           | -0.739011667  | 0.05396551  |                |                 |                 |
| 211003 x at  | TGM2                           | -0.781088333  | 1.455154512 |                |                 |                 |
| 211573 x at  | TGM2                           | -0.628103333  | 2.499099453 |                |                 |                 |
| 219292 at    | THAP1                          | 0.730982167   | 3.701646186 |                |                 |                 |
| 227636 at    | THAP5                          | 0.967545833   | 1.123589586 |                |                 |                 |
| 244190 at    | THAP5                          | 0.844239      | 0           |                |                 |                 |
| 227813 at    | THAP6                          | 0.670287667   | 1.123589586 | THAP6          |                 |                 |
| 229253 at    | THEM4                          | -0.724299     | 0           | THEM4          |                 |                 |
| 219122 s at  | THG1L                          | 0.540751667   | 3.701646186 |                |                 |                 |
| 222931 s at  | THNSL1                         | 1.239501      | 0           |                |                 |                 |
| 242163 at    | THRAP3                         | 1.336853167   | 0           |                |                 |                 |
| 219153 s at  | THSD4                          | 0.5345        | 1.810509752 |                |                 |                 |
| 206555 s at  | THUMPD1                        | 0.867338333   | 0.550502435 |                |                 |                 |
| 213025 at    | THUMPD1                        | 0.707188333   | 3.029425085 |                |                 |                 |
| 228234_at    | TICAM2 ///<br>TMED7-<br>TICAM2 | 0.533758667   | 0.796301331 |                |                 |                 |
| 239431_at    | TICAM2 ///<br>TMED7-<br>TICAM2 | 0.502503333   | 1.123589586 |                |                 |                 |
| 201821 s at  | TIMM17A                        | 0.558996667   | 1.455154512 | TIMM17A        |                 |                 |
| 215171 s at  | TIMM17A                        | 0.601049833   | 1.123589586 | TIMM17A        |                 |                 |
| 217612 at    | TIMM50                         | -0.794937     | 3.701646186 |                |                 |                 |

| Probe Set ID | Gene Symbol | miR-128-miRNC | q value (%) | miR-128 tgts_M | miR-128 tgts_TS | miR-128 tgts_PT |
|--------------|-------------|---------------|-------------|----------------|-----------------|-----------------|
| 203504 s at  | ABCA1       | -1.2890325    | 0           | ABCA1          | ABCA1           | ABCA1           |
| 201666 at    | TIMP1       | 0.594584333   | 0.796301331 |                |                 |                 |
| 201147 s at  | TIMP3       | -1.207296667  | 0           |                |                 |                 |
| 201149 s at  | TIMP3       | -1.3090635    | 0           |                |                 |                 |
| 201150 s at  | TIMP3       | -1.579177333  | 0           |                |                 |                 |
| 220052 s at  | TINF2       | 0.510486      | 0.550502435 |                |                 |                 |
| 223776 x at  | TINF2       | 0.5302055     | 0.230227638 |                |                 |                 |
| 1554091 a at | TIRAP       | 1.183966      | 0           |                |                 |                 |
| 1554408 a at | TK1         | -0.880844     | 3.701646186 |                |                 |                 |
| 203220 s at  | TLE1        | 0.842310167   | 1.455154512 | TLE1           |                 |                 |
| 203222 s at  | TLE1        | 0.6881575     | 0           | TLE1           |                 |                 |
| 204872 at    | TLE4        | -1.330407     | 0           |                |                 |                 |
| 216997 x at  | TLE4        | -0.56603      | 1.123589586 |                |                 |                 |
| 233575 s at  | TLE4        | -0.500881667  | 1.123589586 |                |                 |                 |
| 235765 at    | TLE4        | -0.764995167  | 0.796301331 |                |                 |                 |
| 211077 s at  | TLK1        | 0.677716667   | 1.123589586 |                |                 |                 |
| 211703 s at  | TM2D1       | 0.557349333   | 0.393887585 |                |                 |                 |
| 220639 at    | TM4SF20     | -1.2259335    | 1.810509752 | TM4SF20        |                 |                 |
| 217974 at    | TM7SF3      | 0.998865      | 0           |                |                 |                 |
| 226478 at    | TM7SF3      | 0.974641      | 0.05396551  |                |                 |                 |
| 209150 s at  | TM9SF1      | 0.514476167   | 1.123589586 |                |                 |                 |
| 213349 at    | TMCC1       | 0.569825833   | 0.796301331 |                | TMCC1           | TMCC1           |
| 213351 s at  | TMCC1       | 0.646854      | 0.796301331 |                | TMCC1           | TMCC1           |
| 213352 at    | TMCC1       | 0.856589333   | 2.499099453 |                | TMCC1           | TMCC1           |
| 205812 s at  | TMED9       | 0.980326667   | 1.455154512 |                |                 |                 |
| 224496 s at  | TMEM107     | -2.319192667  | 0           |                |                 |                 |
| 235490 at    | TMEM107     | -2.558746333  | 0           |                |                 |                 |
| 218834 s at  | TMEM132A    | 1.184536667   | 0           |                |                 |                 |
| 219750 at    | TMEM144     | 0.889858167   | 1.455154512 |                |                 |                 |
| 220169 at    | TMEM156     | 1.2796385     | 0           |                |                 |                 |
| 241844 x at  | TMEM156     | 0.797299833   | 0           |                |                 |                 |
| 223202 s at  | TMEM164     | 0.902658667   | 1.810509752 |                |                 |                 |
| 226276_at    | TMEM167A    | -0.536558167  | 0.550502435 | TMEM167A       | TMEM167A        |                 |
| 222495 at    | TMEM167B    | 0.671421333   | 1.810509752 |                |                 |                 |
| 229302 at    | TMEM178     | 1.258114      | 0           | TMEM178        |                 |                 |
| 219253 at    | TMEM185B    | 0.551659667   | 1.810509752 |                |                 |                 |
| 225374 at    | TMEM199     | 0.523440333   | 1.455154512 |                |                 |                 |
| 239265 at    | TMEM20      | 0.6924135     | 0.05396551  | TMEM20         |                 |                 |
| 222752 s at  | TMEM206     | 0.702911667   | 0.796301331 |                |                 |                 |
| 222736 s at  | TMEM38B     | 0.824119333   | 0.05396551  |                |                 |                 |
| 241392 at    | TMEM39A     | 0.791331833   | 0           |                |                 |                 |
| 219410 at    | TMEM45A     | 0.895070833   | 0           |                |                 |                 |
| 218073 s at  | TMEM48      | -0.695563167  | 1.455154512 | TMEM48         |                 |                 |
| 231697 s at  | TMEM49      | 0.756098333   | 0.05396551  |                |                 |                 |
| 204807 at    | TMEM5       | 0.846499333   | 2.499099453 |                |                 |                 |
| 204808 s at  | TMEM5       | 0.52001       | 0.230227638 |                |                 |                 |
| 218815 s at  | TMEM51      | 0.827264      | 0           |                |                 |                 |
| 226338 at    | TMEM55A     | 0.9027805     | 1.123589586 |                |                 |                 |
| 234980 at    | TMEM56      | 0.868272167   | 3.701646186 |                |                 |                 |
| 241342 at    | TMEM65      | 1.23662       | 0.550502435 |                |                 |                 |

| Probe Set ID | Gene Symbol | miR-128-miRNC | q value (%) | miR-128 tgts_M | miR-128 tgts_TS | miR-128 tgts_PT |
|--------------|-------------|---------------|-------------|----------------|-----------------|-----------------|
| 203504 s at  | ABCA1       | -1.2890325    | 0           | ABCA1          | ABCA1           | ABCA1           |
| 219448 at    | TMEM70      | 0.903055      | 3.701646186 | TMEM70         |                 |                 |
| 225411 at    | TMEM87B     | 0.513362333   | 3.701646186 | TMEM87B        |                 |                 |
| 231408 at    | TMEM92      | 1.1122945     | 0           |                |                 |                 |
| 235245 at    | TMEM92      | 0.722644167   | 0.05396551  |                |                 |                 |
| 214948 s at  | TMF1        | 0.997422333   | 0           |                |                 |                 |
| 209753 s at  | TMPO        | -0.503368333  | 1.123589586 |                |                 |                 |
| 217733 s at  | TMSB10      | -0.877435     | 0.393887585 | TMSB10         | TMSB1           | TMSB10          |
| 226604 at    | TMTC3       | 0.959635667   | 1.455154512 |                |                 |                 |
| 208296 x at  | TNFAIP8     | 0.878491333   | 1.123589586 |                |                 |                 |
| 210260 s at  | TNFAIP8     | 0.938972      | 0           |                |                 |                 |
| 1552648 a at | TNFRSF10A   | 0.768871833   | 0.05396551  |                |                 |                 |
| 231775 at    | TNFRSF10A   | 0.652983      | 0.393887585 |                |                 |                 |
| 210654 at    | TNFRSF10D   | 0.789658333   | 0           | TNFRSF10D      |                 |                 |
| 227345 at    | TNFRSF10D   | 0.633996667   | 0.550502435 | TNFRSF10D      |                 |                 |
| 204933 s at  | TNFRSF11B   | 0.558738333   | 0.796301331 |                |                 |                 |
| 214581 x at  | TNFRSF21    | 1.065331333   | 0.550502435 |                |                 |                 |
| 218856 at    | TNFRSF21    | 0.895401333   | 0           |                |                 |                 |
| 216042 at    | TNFRSF25    | 1.102461333   | 0.137080273 |                |                 |                 |
| 221085 at    | TNFSF15     | 2.783961      | 0           |                |                 |                 |
| 218335 x at  | TNIP2       | 0.837049833   | 1.123589586 |                |                 |                 |
| 232160 s at  | TNIP2       | 0.871409667   | 0.550502435 |                |                 |                 |
| 48531 at     | TNIP2       | 0.7555        | 0.550502435 |                |                 |                 |
| 220655 at    | TNIP3       | 2.921262833   | 0           |                |                 |                 |
| 222562 s at  | TNKS2       | 0.530732667   | 3.029425085 |                |                 |                 |
| 213201 s at  | TNNT1       | 1.089247333   | 0.550502435 |                |                 |                 |
| 1557278 s at | TNPO1       | -0.8537615    | 0.137080273 | TNPO1          | TNPO1           |                 |
| 212635 at    | TNPO1       | -0.738175     | 0.550502435 | TNPO1          | TNPO1           |                 |
| 225765 at    | TNPO1       | -0.570330167  | 3.029425085 | TNPO1          | TNPO1           |                 |
| 1553346 a at | TNRC6A      | 0.818029667   | 1.455154512 |                |                 |                 |
| 224705 s at  | TNRC6A      | 0.745126667   | 0.137080273 |                |                 |                 |
| 202704 at    | TOB1        | -0.755804167  | 2.499099453 |                |                 |                 |
| 216100 s at  | TOR1AIP1    | 1.03633       | 0.05396551  |                |                 |                 |
| 223930 at    | TOR1AIP1    | 0.773395167   | 1.123589586 |                |                 |                 |
| 209593 s at  | TOR1B       | 0.629693167   | 1.123589586 |                |                 |                 |
| 232097 at    | TOX4        | 1.166072      | 1.455154512 | TOX4           |                 |                 |
| 203476 at    | TPBG        | 0.994011667   | 0           |                |                 |                 |
| 201689 s at  | TPD52       | 0.558628333   | 3.701646186 |                |                 |                 |
| 201691 s at  | TPD52       | 0.776072      | 0.393887585 |                |                 |                 |
| 203786 s at  | TPD52L1     | 0.506874      | 2.499099453 | TPD52L1        |                 |                 |
| 221218 s at  | TPK1        | 0.809814667   | 0.230227638 |                |                 |                 |
| 223686 at    | TPK1        | 1.046712833   | 0           |                |                 |                 |
| 1558532 at   | TPM1        | 0.602433833   | 1.455154512 | TPM1           |                 |                 |
| 204083 s at  | TPM2        | 0.933481667   | 0           |                |                 |                 |
| 212654 at    | TPM2        | 0.952541833   | 3.029425085 |                |                 |                 |
| 224164 at    | TPM3        | -0.693503667  | 3.701646186 |                |                 |                 |
| 214195 at    | TPP1        | 0.917888833   | 0           |                |                 |                 |
| 224871 at    | TPRG1L      | 0.6953985     | 1.123589586 |                |                 |                 |
| 223031 s at  | TRAF7       | -0.606823     | 3.029425085 | TRAF7          |                 |                 |
| 242497 at    | TRAFD1      | 0.5459815     | 3.701646186 | TRAFD1         |                 |                 |
| 214924 s at  | TRAK1       | 0.815688833   | 3.029425085 | TRAK1          |                 |                 |

| Probe Set ID | Gene Symbol | miR-128-miRNC | q value (%) | miR-128 tgts_M | miR-128 tgts_TS | miR-128 tgts_PT |
|--------------|-------------|---------------|-------------|----------------|-----------------|-----------------|
| 203504 s at  | ABCA1       | -1.2890325    | 0           | ABCA1          | ABCA1           | ABCA1           |
| 226013 at    | TRAK1       | 0.6949135     | 0           | TRAK1          |                 |                 |
| 202124 s at  | TRAK2       | 1.066334333   | 0           |                |                 |                 |
| 202125 s at  | TRAK2       | 1.110968667   | 0           |                |                 |                 |
| 217958 at    | TRAPPC4     | -1.002235167  | 0           | TRAPPC4        |                 |                 |
| 217959 s at  | TRAPPC4     | -1.277003333  | 0           | TRAPPC4        |                 |                 |
| 233324 at    | TRERF1      | 0.841818      | 0.05396551  |                |                 |                 |
| 238520 at    | TRERF1      | 0.983617333   | 0           |                |                 |                 |
| 216298 at    | TRGV5       | 1.331995833   | 0           |                |                 |                 |
| 202241 at    | TRIB1       | 1.598379333   | 0           |                |                 |                 |
| 235641 at    | TRIB1       | 1.157437      | 0.137080273 |                |                 |                 |
| 1559681 a at | TRIM16L     | 0.675759833   | 0           | TRIM16L        |                 |                 |
| 204732 s at  | TRIM23      | 0.813490667   | 3.701646186 | TRIM23         | TRIM23          |                 |
| 210994 x at  | TRIM23      | 0.5782615     | 2.499099453 | TRIM23         | TRIM23          |                 |
| 210995 s at  | TRIM23      | 0.565737333   | 0.393887585 | TRIM23         | TRIM23          |                 |
| 212118 at    | TRIM27      | 0.5668205     | 0.393887585 |                |                 |                 |
| 223830 s at  | TRIM5       | 0.750801167   | 0.393887585 |                |                 |                 |
| 236175 at    | TRIM55      | -0.568981667  | 1.455154512 | TRIM55         |                 |                 |
| 231876 at    | TRIM56      | 0.7408785     | 0.393887585 |                |                 |                 |
| 230280 at    | TRIM9       | 2.0382055     | 0.230227638 |                |                 |                 |
| 1552580 at   | TRIML2      | 0.890231667   | 0           |                |                 |                 |
| 209778 at    | TRIP11      | 0.598265      | 0.137080273 |                |                 |                 |
| 204033 at    | TRIP13      | -0.695190833  | 0           |                |                 |                 |
| 218877 s at  | TRMT11      | 0.50445       | 3.701646186 |                |                 |                 |
| 221952 x at  | TRMT5       | -0.87542      | 1.455154512 |                |                 |                 |
| 222768 s at  | TRMT6       | 0.527885      | 1.455154512 |                |                 |                 |
| 233970 s at  | TRMT6       | 0.751111167   | 0.05396551  |                |                 |                 |
| 227862 at    | TRNP1       | 0.530347333   | 0           |                |                 |                 |
| 236052 at    | TRNP1       | 0.606472      | 2.499099453 |                |                 |                 |
| 207520 at    | TROVE2      | -0.937816667  | 1.455154512 | TROVE2         | TROVE2          | TROVE2          |
| 210438 x at  | TROVE2      | -0.708236667  | 0.550502435 | TROVE2         | TROVE2          | TROVE2          |
| 212839 s at  | TROVE2      | -0.892855     | 0.230227638 | TROVE2         | TROVE2          | TROVE2          |
| 212852 s at  | TROVE2      | -0.503776667  | 1.810509752 | TROVE2         | TROVE2          | TROVE2          |
| 213027 at    | TROVE2      | -0.891877333  | 0           | TROVE2         | TROVE2          | TROVE2          |
| 223436 s at  | TRPT1       | 0.689361333   | 2.499099453 |                |                 |                 |
| 219632 s at  | TRPV1       | 1.144040167   | 0           |                |                 |                 |
| 241606 s at  | TRUB1       | 0.790226      | 0.137080273 |                |                 |                 |
| 209390 at    | TSC1        | 0.652905667   | 0           |                | TSC1            |                 |
| 204094 s at  | TSC22D2     | 0.8098285     | 0.137080273 |                |                 |                 |
| 210953 at    | TSC22D2     | 0.945605667   | 1.455154512 |                |                 |                 |
| 210954 s at  | TSC22D2     | 0.544424333   | 0.796301331 |                |                 |                 |
| 215547 at    | TSC22D2     | 0.816461667   | 0.230227638 |                |                 |                 |
| 208763 s at  | TSC22D3     | 0.672009333   | 1.810509752 | TSC22D3        |                 |                 |
| 225399 at    | TSEN15      | -0.511241667  | 1.810509752 |                |                 |                 |
| 218132 s at  | TSEN34      | -0.549048833  | 0.796301331 | TSEN34         |                 |                 |
| 241402 at    | TSEN54      | 1.427876      | 0           |                |                 |                 |
| 1555931 at   | TSGA10      | 1.036281      | 3.701646186 |                |                 |                 |
| 1555932 at   | TSGA10      | 1.122880833   | 0.550502435 |                |                 |                 |
| 220623 s at  | TSGA10      | 1.404409      | 0           |                |                 |                 |
| 223392 s at  | TSHZ3       | 0.5981515     | 0           |                |                 |                 |
| 209890 at    | TSPAN5      | 0.55447       | 3.029425085 |                |                 |                 |

| Probe Set ID | Gene Symbol | miR-128-miRNC | q value (%) | miR-128 tgts_M | miR-128 tgts_TS | miR-128 tgts_PT |
|--------------|-------------|---------------|-------------|----------------|-----------------|-----------------|
| 203504 s at  | ABCA1       | -1.2890325    | 0           | ABCA1          | ABCA1           | ABCA1           |
| 225387 at    | TSPAN5      | 0.643407      | 1.810509752 |                |                 |                 |
| 225388 at    | TSPAN5      | 0.6991635     | 1.123589586 |                |                 |                 |
| 209108 at    | TSPAN6      | -0.854464     | 2.499099453 | TSPAN6         |                 |                 |
| 239042 at    | TSR1        | 0.593137333   | 3.701646186 | TSR1           |                 |                 |
| 225178 at    | TTC14       | 0.9970595     | 0.393887585 |                |                 |                 |
| 225180 at    | TTC14       | 0.655706333   | 3.029425085 |                |                 |                 |
| 231479 at    | TTC33       | 1.013743667   | 0           |                |                 |                 |
| 204822 at    | TTK         | -0.7019265    | 0.393887585 |                |                 |                 |
| 228031 at    | TTPAL       | 0.673631667   | 0.393887585 |                |                 |                 |
| 201090 x at  | TUBA1B      | -0.620266667  | 3.029425085 |                |                 |                 |
| 212639 x at  | TUBA1B      | -0.501973333  | 3.029425085 |                |                 |                 |
| 213646 x at  | TUBA1B      | -0.525411667  | 3.029425085 |                |                 |                 |
| 209251 x at  | TUBA1C      | -0.600918333  | 1.455154512 |                |                 |                 |
| 211750 x at  | TUBA1C      | -0.634113333  | 1.810509752 |                |                 |                 |
| 208977 x at  | TUBB2C      | -0.745258333  | 0.796301331 |                |                 |                 |
| 213726 x at  | TUBB2C      | -0.701856667  | 0.796301331 |                |                 |                 |
| 202154 x at  | TUBB3       | -0.660278333  | 1.455154512 |                |                 |                 |
| 213476 x at  | TUBB3       | -0.795851667  | 0.230227638 |                |                 |                 |
| 221326 s at  | TUBD1       | 0.9382945     | 1.455154512 |                |                 |                 |
| 230891 at    | TUBE1       | 0.5997825     | 3.701646186 |                |                 |                 |
| 201714 at    | TUBG1       | -0.628452833  | 2.499099453 |                |                 |                 |
| 1554086 at   | TUBGCP3     | 1.110383667   | 0           |                |                 |                 |
| 228397 at    | TUG1        | -0.813692833  | 1.123589586 |                |                 |                 |
| 1554163 at   | TWIST2      | 0.577510833   | 1.455154512 |                |                 |                 |
| 226784 at    | TWISTNB     | -0.591036833  | 1.455154512 | TWISTNB        |                 |                 |
| 209077 at    | TXN2        | -0.593528333  | 1.455154512 |                |                 |                 |
| 220495 s at  | TXNDC15     | 0.501748333   | 1.810509752 |                |                 |                 |
| 226747 at    | TXNDC16     | 0.860187      | 1.455154512 |                |                 |                 |
| 228743 at    | TXNDC17     | 0.510192833   | 3.701646186 |                |                 |                 |
| 1554047 at   | TXNDC9      | 0.879973167   | 3.701646186 |                |                 |                 |
| 201008 s at  | TXNIP       | -1.9244995    | 0           | TXNIP          | TXNIP           |                 |
| 201009 s at  | TXNIP       | -2.001359833  | 0           | TXNIP          | TXNIP           |                 |
| 201010 s at  | TXNIP       | -2.0323135    | 0           | TXNIP          | TXNIP           |                 |
| 218347 at    | TYW1        | -0.747897167  | 0           | TYW1           |                 |                 |
| 1558356 at   | UACA        | -0.570533667  | 2.499099453 |                |                 |                 |
| 223279 s at  | UACA        | -0.5531575    | 1.810509752 |                |                 |                 |
| 236715 x at  | UACA        | -0.686389167  | 0           |                |                 |                 |
| 238868 at    | UACA        | -1.484533667  | 0           |                |                 |                 |
| 228353 x at  | UBASH3B     | 0.903019333   | 1.455154512 |                |                 |                 |
| 238462 at    | UBASH3B     | 0.842356667   | 3.029425085 |                |                 |                 |
| 211764 s at  | UBE2D1      | -1.140967     | 0.230227638 | UBE2D1         |                 |                 |
| 214590 s at  | UBE2D1      | -1.13788      | 0.137080273 | UBE2D1         |                 |                 |
| 218837 s at  | UBE2D4      | 1.083613833   | 0           |                |                 |                 |
| 225651 at    | UBE2E2      | -1.126534167  | 0.393887585 | UBE2E2         | UBE2E2          | UBE2E2          |
| 226005 at    | UBE2G1      | 0.759159833   | 0           |                |                 |                 |
| 225179 at    | UBE2K       | -0.707348333  | 0.230227638 | UBE2K          | UBE2K           |                 |
| 200676 s at  | UBE2L3      | 0.686896      | 0.796301331 | UBE2L3         |                 |                 |
| 200684 s at  | UBE2L3      | 0.620913833   | 3.701646186 | UBE2L3         |                 |                 |
| 201523 x at  | UBE2N       | -0.511350833  | 1.810509752 | UBE2N          | UBE2N           | UBE2N           |
| 201524 x at  | UBE2N       | -0.908216333  | 0.05396551  | UBE2N          | UBE2N           | UBE2N           |

| Probe Set ID | Gene Symbol | miR-128-miRNC | q value (%) | miR-128 tgts_M | miR-128 tgts_TS | miR-128 tgts_PT |
|--------------|-------------|---------------|-------------|----------------|-----------------|-----------------|
| 203504 s at  | ABCA1       | -1.2890325    | 0           | ABCA1          | ABCA1           | ABCA1           |
| 202779 s at  | UBE2S       | -1.023673667  | 3.701646186 |                |                 |                 |
| 212404 s at  | UBE3B       | 0.614685      | 2.499099453 |                |                 |                 |
| 227914 s at  | UBE3B       | 0.673489667   | 2.499099453 |                |                 |                 |
| 1554794 a at | UBE3C       | 0.555714833   | 1.455154512 | UBE3C          |                 |                 |
| 225445 at    | UBN2        | 0.940962      | 0.393887585 | UBN2           |                 |                 |
| 238349 at    | UBN2        | 0.860780333   | 0.796301331 | UBN2           |                 |                 |
| 238350 at    | UBN2        | 0.862886833   | 0.550502435 | UBN2           |                 |                 |
| 226921 at    | UBR1        | -0.612165     | 1.123589586 | UBR1           | UBR1            |                 |
| 212756 s at  | UBR2        | 0.598286667   | 0.796301331 |                |                 |                 |
| 230029 x at  | UBR3        | 1.188227833   | 0.393887585 |                |                 |                 |
| 234982 at    | UBR3        | 0.838677667   | 0.550502435 |                |                 |                 |
| 244121 at    | UBR3        | 0.9483185     | 0           |                |                 |                 |
| 214881 s at  | UBTF        | 0.607596      | 1.810509752 | UBTF           |                 |                 |
| 212934 at    | UBXN2B      | 0.503589167   | 2.499099453 |                |                 |                 |
| 215983 s at  | UBXN8       | 0.973906      | 0           |                |                 |                 |
| 227919 at    | UCA1        | -0.99319      | 0           |                |                 |                 |
| 208997 s at  | UCP2        | -1.2851575    | 0           |                |                 |                 |
| 218190 s at  | UCRC        | -0.783818167  | 0.796301331 |                |                 |                 |
| 1552656 s at | UHMK1       | 1.04659       | 0           |                |                 |                 |
| 227740 at    | UHMK1       | 0.820706667   | 0           |                |                 |                 |
| 235003 at    | UHMK1       | 0.804786667   | 0           |                |                 |                 |
| 1554292 a at | UHRF1BP1L   | 0.698273333   | 0.796301331 |                |                 |                 |
| 221291 at    | ULBP2       | 0.7267855     | 2.499099453 |                |                 |                 |
| 238542 at    | ULBP2       | 0.8159665     | 0.796301331 |                |                 |                 |
| 202893 at    | UNC13B      | 0.6776495     | 2.499099453 |                |                 |                 |
| 1560320 a at | UNQ2963     | 0.758240333   | 1.455154512 |                |                 |                 |
| 217935 s at  | UQCC        | -0.823454     | 0           | UQCC           |                 |                 |
| 202090 s at  | UQCR        | -0.610699167  | 1.123589586 |                |                 |                 |
| 222616 s at  | USP16       | 0.508651667   | 1.455154512 |                |                 |                 |
| 226357 at    | USP19       | 0.708962167   | 1.810509752 |                |                 |                 |
| 207213 s at  | USP2        | 1.095245167   | 0           | USP2           |                 |                 |
| 218367 x at  | USP21       | 0.532846333   | 3.029425085 |                |                 |                 |
| 232219 x at  | USP21       | 0.6359385     | 1.455154512 |                |                 |                 |
| 234735 s at  | USP21       | 0.585067      | 1.123589586 |                |                 |                 |
| 230004 at    | USP24       | -0.556895667  | 3.029425085 |                |                 |                 |
| 226033 at    | USP31       | 0.834871      | 0.137080273 |                |                 |                 |
| 226035 at    | USP31       | 0.897176333   | 0           |                |                 |                 |
| 227256 at    | USP31       | 0.588958333   | 0.796301331 |                |                 |                 |
| 212066 s at  | USP34       | -0.599973333  | 1.455154512 | USP34          |                 |                 |
| 232033 at    | USP37       | 1.083132      | 0.550502435 |                |                 |                 |
| 237439 at    | USP43       | 0.811389167   | 3.701646186 |                |                 |                 |
| 203870 at    | USP46       | 0.657796      | 1.810509752 |                | USP46           | USP46           |
| 225925 s at  | USP48       | 0.695828      | 0.393887585 |                |                 |                 |
| 230083 at    | USP53       | 0.941820833   | 0           |                |                 |                 |
| 231817 at    | USP53       | 0.850071667   | 2.499099453 |                |                 |                 |
| 221098 x at  | UTP14A      | 0.689121833   | 1.455154512 |                |                 |                 |
| 203614 at    | UTP14C      | 0.933465333   | 1.455154512 |                |                 |                 |
| 238561 s at  | UTP23       | 0.6452475     | 3.029425085 |                |                 |                 |
| 218495 at    | UXT         | 0.525262333   | 3.029425085 |                |                 |                 |
| 213326 at    | VAMP1       | 0.544537833   | 2.499099453 | VAMP1          |                 |                 |

| Probe Set ID | Gene Symbol               | miR-128-miRNC | q value (%) | miR-128 tgts_M | miR-128 tgts_TS | miR-128 tgts_PT |
|--------------|---------------------------|---------------|-------------|----------------|-----------------|-----------------|
| 203504 s at  | ABCA1                     | -1.2890325    | 0           | ABCA1          | ABCA1           | ABCA1           |
| 219330 at    | VANGL1                    | -0.637755167  | 0.137080273 |                | VANGL1          |                 |
| 229997 at    | VANGL1                    | -0.551715167  | 0.05396551  |                | VANGL1          |                 |
| 225198 at    | VAPA                      | -0.627839833  | 0.230227638 |                |                 |                 |
| 201796 s at  | VAR5                      | 0.609038833   | 2.499099453 |                |                 |                 |
| 224221 s at  | VAV3                      | 2.711480167   | 0           | VAV3           | VAV3            | VAV3            |
| 201472 at    | VBP1                      | -0.820931333  | 0.393887585 |                |                 |                 |
| 204620 s at  | VCAN                      | -0.592344833  | 1.455154512 | VCAN           |                 |                 |
| 211571 s at  | VCAN                      | -0.68537      | 0.550502435 | VCAN           |                 |                 |
| 215646 s at  | VCAN                      | -0.623589     | 0.796301331 | VCAN           |                 |                 |
| 221731 x at  | VCAN                      | -0.543758167  | 3.029425085 | VCAN           |                 |                 |
| 204254 s at  | VDR                       | 1.716133667   | 0           |                |                 |                 |
| 204255 s at  | VDR                       | 1.307296667   | 1.810509752 |                |                 |                 |
| 213692 s at  | VDR                       | 1.408017833   | 1.455154512 |                |                 |                 |
| 210512 s at  | VEGFA                     | 1.104937667   | 0.230227638 |                |                 |                 |
| 211527 x at  | VEGFA                     | 0.713186      | 0           |                |                 |                 |
| 229760 at    | VEPH1                     | -0.6281685    | 0.796301331 |                |                 |                 |
| 1553679 s at | VKORC1L1                  | 0.603451833   | 1.455154512 |                |                 |                 |
| 209822 s at  | VLDLR                     | 0.711660667   | 0.550502435 | VLDLR          |                 |                 |
| 1558549 s at | VNN1                      | 1.805833333   | 0.05396551  |                |                 |                 |
| 227988 s at  | VPS13A                    | 0.5737205     | 1.810509752 | VPS13A         |                 |                 |
| 1560060 s at | VPS37C                    | 0.7965195     | 0.393887585 |                |                 |                 |
| 219053 s at  | VPS37C                    | 0.714029833   | 1.123589586 |                |                 |                 |
| 222627 at    | VPS54                     | 0.634943333   | 0.796301331 |                |                 |                 |
| 203856 at    | VRK1                      | -0.546727     | 1.455154512 |                |                 |                 |
| 235818 at    | VSTM1                     | 0.740603167   | 0           |                |                 |                 |
| 1562226 at   | VWDE                      | 0.501142833   | 1.123589586 |                |                 |                 |
| 221725 at    | WASF2                     | 0.613088333   | 0.796301331 |                |                 |                 |
| 224562 at    | WASF2                     | 0.575632667   | 3.029425085 |                |                 |                 |
| 224563 at    | WASF2                     | 0.606848333   | 1.123589586 |                |                 |                 |
| 205810 s at  | WASL                      | 0.651455      | 2.499099453 | WASL           |                 |                 |
| 224800 at    | WDFY1                     | -0.505709833  | 2.499099453 | WDFY1          |                 |                 |
| 240282 at    | WDR1                      | 1.3004795     | 2.499099453 | WDR1           |                 |                 |
| 1552430 at   | WDR17                     | 1.014875667   | 3.029425085 | WDR17          |                 |                 |
| 220917 s at  | WDR19                     | 0.5199215     | 2.499099453 | WDR19          |                 |                 |
| 224897 at    | WDR26                     | 0.539098333   | 1.810509752 | WDR26          |                 |                 |
| 229141 at    | WDR33                     | -1.179800167  | 3.029425085 |                |                 |                 |
| 243832 at    | WDR33                     | -0.7723765    | 1.455154512 |                |                 |                 |
| 203855 at    | WDR47                     | 0.737884333   | 0.796301331 | WDR47          |                 |                 |
| 228295 at    | WDR59                     | 0.662339667   | 0.230227638 | WDR59          |                 |                 |
| 230612 at    | WDR73                     | 1.035735833   | 2.499099453 |                |                 |                 |
| 235025 at    | WDR89                     | 0.8324365     | 0.550502435 |                |                 |                 |
| 244038 at    | WDR89                     | 0.542373333   | 1.455154512 |                |                 |                 |
| 212533 at    | WEE1                      | -0.9728195    | 0.137080273 | WEE1           |                 | WEE1            |
| 1557261_at   | WHAMML1<br>///<br>WHAMML2 | 1.242827333   | 0           |                |                 |                 |
| 202663 at    | WIPF1                     | 0.594253333   | 2.499099453 |                |                 |                 |
| 202665 s at  | WIPF1                     | 0.516901667   | 2.499099453 |                |                 |                 |
| 213836 s at  | WIPI1                     | 0.684744667   | 2.499099453 |                |                 |                 |
| 202031 s at  | WIPI2                     | -0.551663833  | 3.029425085 |                |                 |                 |

| Probe Set ID | Gene Symbol | miR-128-miRNC | q value (%) | miR-128 tgts_M | miR-128 tgts_TS | miR-128 tgts_PT |
|--------------|-------------|---------------|-------------|----------------|-----------------|-----------------|
| 203504_s_at  | ABCA1       | -1.2890325    | 0           | ABCA1          | ABCA1           | ABCA1           |
| 204710_s_at  | WIPI2       | -0.723323167  | 3.029425085 |                |                 |                 |
| 211994_at    | WNK1        | -0.641405     | 1.455154512 | WNK1           | WNK1            |                 |
| 210248_at    | WNT7A       | 0.780351167   | 2.499099453 |                |                 |                 |
| 222489_s_at  | WRNIP1      | 0.562741      | 0.230227638 |                |                 |                 |
| 213734_at    | WSB2        | 0.649616667   | 0.550502435 |                |                 |                 |
| 229630_s_at  | WTAP        | -0.564125     | 1.810509752 | WTAP           |                 | WTAP            |
| 216074_x_at  | WWC1        | 0.588408333   | 1.455154512 |                |                 |                 |
| 1554762_a_at | WWC2        | 0.7482225     | 1.123589586 |                |                 |                 |
| 218775_s_at  | WWC2        | 0.656495      | 3.029425085 |                |                 |                 |
| 225273_at    | WWC3        | 0.594894      | 3.701646186 |                |                 |                 |
| 1552737_s_at | WWP2        | 0.788207667   | 0           | WWP2           |                 |                 |
| 206536_s_at  | XIAP        | 0.795924333   | 1.123589586 |                |                 |                 |
| 225859_at    | XIAP        | 0.719897      | 3.029425085 |                |                 |                 |
| 1557436_at   | XKR6        | -0.566865     | 0.796301331 |                |                 |                 |
| 205672_at    | XPA         | -0.630353333  | 2.499099453 |                |                 |                 |
| 223055_s_at  | XPO5        | 0.59546       | 1.455154512 |                |                 |                 |
| 223057_s_at  | XPO5        | 0.7299345     | 0.230227638 |                |                 |                 |
| 203655_at    | XRCC1       | 0.58898       | 1.455154512 |                |                 |                 |
| 208318_s_at  | XYLB        | 1.392730667   | 0           |                |                 |                 |
| 216338_s_at  | YIPF3       | 0.608933167   | 1.455154512 |                |                 |                 |
| 212341_at    | YIPF6       | 0.579288333   | 1.455154512 |                |                 |                 |
| 215150_at    | YOD1        | 0.814630333   | 0.550502435 |                |                 |                 |
| 227309_at    | YOD1        | 0.617484667   | 0.550502435 |                |                 |                 |
| 227020_at    | YPEL2       | 0.783524667   | 0           | YPEL2          | YPEL2           |                 |
| 229060_at    | YPEL2       | 0.6872345     | 0.137080273 | YPEL2          | YPEL2           |                 |
| 222430_s_at  | YTHDF2      | 0.501220333   | 0.393887585 |                |                 |                 |
| 212426_s_at  | YWHAQ       | -0.63261      | 1.455154512 | YWHAQ          |                 |                 |
| 238613_at    | ZAK         | 0.616726667   | 0.393887585 |                |                 |                 |
| 213376_at    | ZBTB1       | 0.654955167   | 0.550502435 |                |                 |                 |
| 244581_at    | ZBTB20      | -1.030336167  | 1.123589586 |                |                 |                 |
| 205340_at    | ZBTB24      | 0.659062167   | 0.550502435 | ZBTB24         |                 |                 |
| 227111_at    | ZBTB34      | 0.6922225     | 0.796301331 |                | ZBTB34          |                 |
| 205256_at    | ZBTB39      | 0.940516833   | 1.810509752 |                | ZBTB39          |                 |
| 204181_s_at  | ZBTB43      | 0.672000167   | 1.123589586 |                |                 |                 |
| 204182_s_at  | ZBTB43      | 0.828084167   | 3.701646186 |                |                 |                 |
| 227991_x_at  | ZBTB43      | 0.632332833   | 2.499099453 |                |                 |                 |
| 1554469_at   | ZBTB44      | 0.831187667   | 0.393887585 | ZBTB44         |                 |                 |
| 226554_at    | ZBTB7A      | 0.593588333   | 0.550502435 |                |                 |                 |
| 227809_at    | ZC3H6       | 0.986935333   | 1.810509752 |                |                 |                 |
| 241372_at    | ZC3H6       | 0.836259333   | 0.796301331 |                |                 |                 |
| 221193_s_at  | ZCCHC10     | 0.6608775     | 1.810509752 |                |                 |                 |
| 219062_s_at  | ZCCHC2      | 0.999112833   | 0           | ZCCHC2         |                 |                 |
| 222816_s_at  | ZCCHC2      | 1.696921667   | 0           | ZCCHC2         |                 |                 |
| 220933_s_at  | ZCCHC6      | 0.690483      | 0.796301331 |                |                 |                 |
| 236155_at    | ZCCHC6      | 0.551695      | 1.810509752 |                |                 |                 |
| 242776_at    | ZCCHC6      | 0.69646       | 0           |                |                 |                 |
| 243863_at    | ZCWPW2      | 0.554588167   | 3.701646186 |                |                 |                 |
| 243550_at    | ZDHHC21     | 0.653324833   | 3.029425085 |                |                 |                 |
| 226912_at    | ZDHHC23     | 1.569156      | 0           |                |                 |                 |
| 202456_s_at  | ZER1        | 0.753495167   | 1.455154512 |                |                 |                 |



| Probe Set ID | Gene Symbol | miR-128-miRNC | q value (%) | miR-128 tgts_M | miR-128 tgts_TS | miR-128 tgts_PT |
|--------------|-------------|---------------|-------------|----------------|-----------------|-----------------|
| 203504 s at  | ABCA1       | -1.2890325    | 0           | ABCA1          | ABCA1           | ABCA1           |
| 230358 at    | ZER1        | 0.7053155     | 3.029425085 |                |                 |                 |
| 219779 at    | ZFHX4       | 0.609062333   | 1.123589586 |                | ZFHX4           | ZFHX4           |
| 222407 s at  | ZFP106      | 1.072288667   | 0.137080273 |                |                 |                 |
| 231943 at    | ZFP28       | 1.028413333   | 1.123589586 |                |                 |                 |
| 234300 s at  | ZFP28       | 1.125138333   | 0           |                |                 |                 |
| 234937 x at  | ZFP28       | 1.015445667   | 0           |                |                 |                 |
| 240565 at    | ZFP28       | 1.189270667   | 0           |                |                 |                 |
| 211962 s at  | ZFP36L1     | 0.55436       | 1.455154512 | ZFP36L1        | ZFP36L1         |                 |
| 218968 s at  | ZFP64       | 0.947905167   | 0           | ZFP64          |                 |                 |
| 213073 at    | ZFYVE26     | 0.787975333   | 0.550502435 |                |                 |                 |
| 37943 at     | ZFYVE26     | 0.844936667   | 0.550502435 |                |                 |                 |
| 225218 at    | ZFYVE27     | 0.667442333   | 2.499099453 |                |                 |                 |
| 203556 at    | ZHX2        | 1.322285333   | 0           |                |                 |                 |
| 214670 at    | ZKSCAN1     | 0.754974833   | 1.455154512 | ZKSCAN1        |                 |                 |
| 226344 at    | ZMAT1       | 0.528087833   | 2.499099453 |                |                 |                 |
| 224782 at    | ZMAT2       | -0.529036667  | 0.550502435 |                |                 |                 |
| 221924 at    | ZMIZ2       | 0.599678167   | 0.137080273 | ZMIZ2          |                 |                 |
| 210282 at    | ZMYM2       | -1.075613333  | 0.137080273 |                |                 |                 |
| 1552970 s at | ZMYM6       | 0.7626815     | 1.455154512 |                |                 |                 |
| 1561892 at   | ZMYM6       | 0.732348333   | 0.393887585 |                |                 |                 |
| 219925 at    | ZMYM6       | 0.938075      | 0           |                |                 |                 |
| 227594 at    | ZMYM6       | 0.8488685     | 0.796301331 |                |                 |                 |
| 227595 at    | ZMYM6       | 0.777646167   | 0.05396551  |                |                 |                 |
| 230821 at    | ZNF148      | 0.555354667   | 3.029425085 |                |                 |                 |
| 213452 at    | ZNF184      | 0.700451167   | 3.701646186 |                |                 |                 |
| 223792 at    | ZNF2        | 0.877716      | 1.123589586 |                |                 |                 |
| 204327 s at  | ZNF202      | 0.605548333   | 1.455154512 |                |                 |                 |
| 239937 at    | ZNF207      | 1.046833      | 1.810509752 |                |                 |                 |
| 207125 at    | ZNF225      | 0.771634167   | 0.230227638 |                |                 |                 |
| 227689 at    | ZNF227      | 0.528229667   | 3.701646186 |                |                 |                 |
| 219123 at    | ZNF232      | 0.576597333   | 3.029425085 |                |                 |                 |
| 242953 at    | ZNF234      | 0.674824167   | 1.123589586 |                |                 |                 |
| 1554045 at   | ZNF24       | 1.081589833   | 0           |                | ZNF24           |                 |
| 206862 at    | ZNF254      | 0.796424333   | 1.810509752 | ZNF254         |                 |                 |
| 1558700 s at | ZNF260      | 0.822571333   | 0.230227638 |                |                 |                 |
| 228920 at    | ZNF260      | 0.690647833   | 0.393887585 |                |                 |                 |
| 205917 at    | ZNF264      | 0.726886833   | 0.796301331 |                |                 |                 |
| 230063 at    | ZNF264      | 0.607661167   | 3.029425085 |                |                 |                 |
| 225383 at    | ZNF275      | 0.529587167   | 0.230227638 |                |                 |                 |
| 1557684 at   | ZNF286A     | 0.659974667   | 0           | ZNF286A        |                 |                 |
| 203520 s at  | ZNF318      | 0.660320167   | 0.550502435 |                |                 |                 |
| 241704 x at  | ZNF320      | 0.564635667   | 2.499099453 |                |                 |                 |
| 228711 at    | ZNF37A      | 0.701060333   | 0.393887585 |                |                 |                 |
| 212369 at    | ZNF384      | 0.606003333   | 3.029425085 |                |                 |                 |
| 220616 at    | ZNF384      | 0.572694      | 3.701646186 |                |                 |                 |
| 228927 at    | ZNF397      | 0.852749167   | 0           | ZNF397         |                 |                 |
| 227768 at    | ZNF407      | 0.524374833   | 3.029425085 |                |                 |                 |
| 209944 at    | ZNF410      | 0.714037333   | 2.499099453 |                |                 |                 |
| 206810 at    | ZNF44       | 0.932830833   | 3.701646186 |                |                 |                 |
| 241066 at    | ZNF449      | 0.8750665     | 0.230227638 | ZNF449         |                 |                 |

| Probe Set ID | Gene Symbol            | miR-128-miRNC | q value (%) | miR-128 tgts_M | miR-128 tgts_TS | miR-128 tgts_PT |
|--------------|------------------------|---------------|-------------|----------------|-----------------|-----------------|
| 203504_s_at  | ABCA1                  | -1.2890325    | 0           | ABCA1          | ABCA1           | ABCA1           |
| 234921_at    | ZNF470                 | 0.874494167   | 1.455154512 | ZNF470         |                 |                 |
| 213124_at    | ZNF473                 | 0.5141015     | 0.137080273 |                |                 |                 |
| 226676_at    | ZNF521                 | -0.511726     | 0.550502435 |                |                 |                 |
| 226677_at    | ZNF521                 | -0.520586     | 1.455154512 |                |                 |                 |
| 228305_at    | ZNF565                 | 0.609512333   | 1.123589586 |                |                 |                 |
| 204473_s_at  | ZNF592                 | 0.547934667   | 3.029425085 |                |                 |                 |
| 230542_at    | ZNF597                 | 0.7100525     | 1.123589586 |                |                 |                 |
| 242463_x_at  | ZNF600                 | 0.907596833   | 0.393887585 |                |                 |                 |
| 212617_at    | ZNF609                 | 0.786883      | 0.393887585 |                |                 |                 |
| 241499_at    | ZNF621                 | 0.554462333   | 1.455154512 |                |                 |                 |
| 226509_at    | ZNF641                 | 1.624502667   | 0           |                |                 |                 |
| 235179_at    | ZNF641                 | 1.501945167   | 0           |                |                 |                 |
| 207219_at    | ZNF643                 | 1.1623555     | 0           |                |                 |                 |
| 1553702_at   | ZNF697                 | 1.203209      | 0           |                |                 |                 |
| 227080_at    | ZNF697                 | 1.165404333   | 0           |                |                 |                 |
| 39891_at     | ZNF710                 | 0.784940833   | 0           |                |                 |                 |
| 238510_at    | ZNF720                 | 0.587428      | 3.701646186 | ZNF720         |                 |                 |
| 1558277_at   | ZNF740                 | 1.157823667   | 0.230227638 |                |                 |                 |
| 238687_x_at  | ZNF770                 | 0.588467      | 1.810509752 |                |                 |                 |
| 215570_s_at  | ZNF780A ///<br>ZNF780B | 0.55669       | 2.499099453 |                |                 |                 |
| 214899_at    | ZNF780B                | 0.7489        | 3.029425085 |                |                 |                 |
| 239083_at    | ZNF786                 | 0.760706167   | 1.123589586 |                |                 |                 |
| 214138_at    | ZNF79                  | 0.699032      | 0.230227638 |                |                 |                 |
| 238436_s_at  | ZNF805                 | 0.766011833   | 1.810509752 |                |                 |                 |
| 238437_at    | ZNF805                 | 0.5952785     | 1.810509752 |                |                 |                 |
| 228046_at    | ZNF827                 | 0.566657333   | 1.123589586 | ZNF827         | ZNF827          | ZNF827          |
| 243617_at    | ZNF827                 | 0.634734667   | 3.701646186 | ZNF827         | ZNF827          | ZNF827          |
| 221645_s_at  | ZNF83                  | 0.546327667   | 1.455154512 |                |                 |                 |
| 1564662_at   | ZNF852                 | 0.790391833   | 0.550502435 |                |                 |                 |
| 213444_at    | ZNF862                 | 1.181195667   | 0.05396551  |                |                 |                 |
| 226808_at    | ZNF862                 | 1.258181      | 0           |                |                 |                 |
| 1564962_at   | ZNF92                  | 0.670812      | 1.810509752 |                |                 |                 |
| 1564963_x_at | ZNF92                  | 0.706909167   | 2.499099453 |                |                 |                 |
| 218932_at    | ZNHIT6                 | -0.700472667  | 0.137080273 | ZNHIT6         |                 |                 |
| 223639_s_at  | ZNRD1                  | 0.679632667   | 1.810509752 |                |                 |                 |
| 225131_at    | ZRANB1                 | 0.64868       | 0.393887585 |                |                 |                 |
| 225138_at    | ZRANB1                 | 0.549817333   | 1.810509752 |                |                 |                 |
| 241345_at    | ZRANB2                 | 1.095827333   | 3.029425085 |                |                 |                 |
| 228769_at    | ZSCAN22                | 1.189661667   | 0           |                |                 |                 |
| 1564039_at   | ZSCAN23                | 0.780899167   | 0           |                |                 |                 |
| 204026_s_at  | ZWINT                  | -0.948288667  | 0.230227638 |                |                 |                 |
| 215263_at    | ZXDA ///<br>ZXDB       | 0.603341      | 0           |                |                 |                 |
| 216013_at    | ZXDB                   | 0.53733       | 1.123589586 |                |                 |                 |
| 228005_at    | ZXDB                   | 0.521978833   | 3.701646186 |                |                 |                 |
| 230106_at    | ZXDC                   | 0.502503667   | 3.029425085 | ZXDC           |                 |                 |
| 230209_at    | ZXDC                   | 1.582206      | 1.810509752 | ZXDC           |                 |                 |
| 234991_at    | ZXDC                   | 0.845447667   | 1.455154512 | ZXDC           |                 |                 |

**Supplementary Table 3. Differentially expressed genes in siRNA transfected HEY cells.** Significantly differentially expressed genes (fold change  $\geq 1.4$ , FDR  $\leq 5\%$ ) following EGFR siRNA transfection, compared to siNC transfection of HEY cells. ‘Probeset ID’ refers to Affymetrix HG-U133 Plus 2.0 probeset identifier. ‘Gene Symbol’ shows the official gene symbol for the corresponding Probeset ID. ‘siRNA-siNC’ refers to the difference between average log2 signal values of siRNA transfected cells and the siNC transfected cells. ‘q-value (%)’ shows the false discovery rate calculated using the SAM algorithm. All transfections were carried out in triplicates.

| <b>Probeset ID</b> | <b>Gene Symbol</b> | <b>siRNA-siNC</b> | <b>q-value (%)</b> |
|--------------------|--------------------|-------------------|--------------------|
| 201110_s at        | THBS1              | 1.15              | 3.43               |
| 201109_s at        | THBS1              | 1.06              | 3.43               |
| 202310_s at        | COL1A1             | 0.87              | 4.02               |
| 201108_s at        | THBS1              | 0.76              | 3.43               |
| 207950_s at        | ANK3               | 0.75              | 3.43               |
| 203139_at          | DAPK1              | 0.57              | 3.43               |
| 231618_s at        | SUNC1              | -0.82             | 0.00               |
| 229672_at          | UQCC               | -0.96             | 0.00               |
| 201983_s at        | EGFR               | -1.04             | 0.00               |
| 208885_at          | LCP1               | -1.04             | 0.00               |
| 211607_x at        | EGFR               | -1.15             | 0.00               |
| 210984_x at        | EGFR               | -1.17             | 0.00               |
| 221786_at          | C6orf120           | -1.26             | 0.00               |

**Supplementary Table 4. miRNA target enrichment analysis among up-regulated genes following miR-128 transfection.**

Genomica enrichment (FDR <0.05) of miRNA targets among significantly up-regulated genes following miR-128 transfection into HEY cells. Regulating miRNAs are predicted using miRanda (those with the prefix John04 or SloanKettering), TargetScan or PicTar. Only “up” genes, i.e. up-regulated in the transfection, are analyzed (‘Set’). The other columns show the p-value of enrichment, the number of probesets in our dataset that are up-regulated and present in Genomica database (‘Set Size’), compared to the number of probesets in each set in the background Affymetrix chip (‘Total Size’). If a probeset is a predicted target of a miRNA then it is considered a ‘hit’ (‘Set Hits’ and ‘Total Hits’). The percentages calculated from raw numbers of genes that belong in each set are also shown.

| <b>Set</b> | <b>Enriched Set</b>          | <b>Enriched Value</b> | <b>P-value</b> | <b>Set Hits</b> | <b>Set Size</b> | <b>Set Hits (%)</b> | <b>Total Hits</b> | <b>Total Size</b> | <b>Total Hits (%)</b> |
|------------|------------------------------|-----------------------|----------------|-----------------|-----------------|---------------------|-------------------|-------------------|-----------------------|
| Up         | John04_hsa-miR-191           | 1                     | 1.32E-08       | 36              | 2148            | 1.68                | 253               | 43407             | 0.59                  |
| Up         | John04_hsa-miR-363           | 1                     | 2.62E-04       | 36              | 2148            | 1.68                | 389               | 43407             | 0.9                   |
| Up         | Targetscan_hsa-miR-409-5p    | 1                     | 3.07E-03       | 28              | 2148            | 1.31                | 323               | 43407             | 0.75                  |
| Up         | SloanKettering_hsa-miR-20    | 1                     | 1.93E-07       | 44              | 2148            | 2.05                | 381               | 43407             | 0.88                  |
| Up         | SloanKettering_hsa-miR-17_5p | 1                     | 1.27E-05       | 34              | 2148            | 1.59                | 309               | 43407             | 0.72                  |
| Up         | John04_hsa-miR-106a          | 1                     | 2.06E-03       | 43              | 2148            | 2.01                | 547               | 43407             | 1.27                  |

| Set | Enriched Set              | Enriched Value | P-value  | Set Hits | Set Size | Set Hits (%) | Total Hits | Total Size | Total Hits (%) |
|-----|---------------------------|----------------|----------|----------|----------|--------------|------------|------------|----------------|
| Up  | John04_hsa-miR-148        | 1              | 3.83E-03 | 67       | 2148     | 3.12         | 968        | 43407      | 2.24           |
| Up  | John04_hsa-miR-18         | 1              | 7.64E-09 | 87       | 2148     | 4.06         | 921        | 43407      | 2.13           |
| Up  | John04_hsa-miR-183        | 1              | 2.48E-03 | 60       | 2148     | 2.8          | 832        | 43407      | 1.92           |
| Up  | John04_hsa-miR-93         | 1              | 6.30E-05 | 56       | 2148     | 2.61         | 657        | 43407      | 1.52           |
| Up  | John04_mmu-miR-148a       | 1              | 3.83E-03 | 67       | 2148     | 3.12         | 968        | 43407      | 2.24           |
| Up  | John04_mmu-miR-291_3p     | 1              | 7.17E-04 | 66       | 2148     | 3.08         | 887        | 43407      | 2.05           |
| Up  | John04_mmu-miR-300        | 1              | 2.84E-03 | 61       | 2148     | 2.84         | 854        | 43407      | 1.97           |
| Up  | Pictar_hsa-miR-183        | 1              | 1.20E-03 | 64       | 2148     | 2.98         | 872        | 43407      | 2.01           |
| Up  | Pictar_hsa-miR-33         | 1              | 7.07E-03 | 57       | 2148     | 2.66         | 823        | 43407      | 1.9            |
| Up  | Pictar_hsa-miR-145        | 1              | 2.21E-05 | 71       | 2148     | 3.31         | 862        | 43407      | 1.99           |
| Up  | Targetscan_hsa-miR-183    | 1              | 4.05E-04 | 66       | 2148     | 3.08         | 868        | 43407      | 2              |
| Up  | Targetscan_hsa-miR-199    | 1              | 2.16E-04 | 64       | 2148     | 2.98         | 816        | 43407      | 1.88           |
| Up  | Targetscan_hsa-miR-324-3p | 1              | 4.00E-04 | 42       | 2148     | 1.96         | 488        | 43407      | 1.13           |
| Up  | Targetscan_hsa-miR-33     | 1              | 1.88E-03 | 55       | 2148     | 2.57         | 739        | 43407      | 1.71           |
| Up  | John04_hsa-miR-145        | 1              | 1.84E-04 | 58       | 2148     | 2.71         | 716        | 43407      | 1.65           |

| Set | Enriched Set            | Enriched Value | P-value  | Set Hits | Set Size | Set Hits (%) | Total Hits | Total Size | Total Hits (%) |
|-----|-------------------------|----------------|----------|----------|----------|--------------|------------|------------|----------------|
| Up  | John04_hsa-miR-30d      | 1              | 5.69E-04 | 68       | 2148     | 3.17         | 912        | 43407      | 2.11           |
| Up  | Pictar_hsa-miR-122a     | 1              | 8.67E-04 | 32       | 2148     | 1.49         | 355        | 43407      | 0.82           |
| Up  | Targetscan_hsa-miR-122a | 1              | 1.29E-03 | 34       | 2148     | 1.59         | 394        | 43407      | 0.91           |
| Up  | Targetscan_hsa-miR-299  | 1              | 1.87E-04 | 56       | 2148     | 2.61         | 685        | 43407      | 1.58           |
| Up  | Targetscan_hsa-miR-378  | 1              | 1.97E-04 | 71       | 2148     | 3.31         | 926        | 43407      | 2.14           |
| Up  | John04_hsa-let-7a       | 1              | 1.71E-04 | 63       | 2148     | 2.94         | 793        | 43407      | 1.83           |
| Up  | John04_hsa-let-7c       | 1              | 5.12E-03 | 53       | 2148     | 2.47         | 742        | 43407      | 1.71           |
| Up  | John04_hsa-let-7d       | 1              | 1.31E-04 | 65       | 2148     | 3.03         | 817        | 43407      | 1.89           |
| Up  | John04_hsa-let-7e       | 1              | 6.60E-03 | 52       | 2148     | 2.43         | 735        | 43407      | 1.7            |
| Up  | John04_hsa-let-7f       | 1              | 8.98E-08 | 73       | 2148     | 3.4          | 767        | 43407      | 1.77           |
| Up  | John04_hsa-let-7g       | 1              | 1.50E-04 | 67       | 2148     | 3.12         | 853        | 43407      | 1.97           |
| Up  | John04_hsa-let-7i       | 1              | 4.47E-04 | 61       | 2148     | 2.84         | 790        | 43407      | 1.82           |
| Up  | John04_hsa-miR-221      | 1              | 3.72E-04 | 38       | 2148     | 1.77         | 426        | 43407      | 0.99           |
| Up  | John04_hsa-miR-98       | 1              | 6.58E-06 | 66       | 2148     | 3.08         | 755        | 43407      | 1.74           |
| Up  | John04_rno-miR-327      | 1              | 5.94E-04 | 45       | 2148     | 2.1          | 544        | 43407      | 1.26           |

| Set | Enriched Set               | Enriched Value | P-value  | Set Hits | Set Size | Set Hits (%) | Total Hits | Total Size | Total Hits (%) |
|-----|----------------------------|----------------|----------|----------|----------|--------------|------------|------------|----------------|
| Up  | John04_hsa-miR-29c         | 1              | 4.14E-03 | 62       | 2148     | 2.89         | 886        | 43407      | 2.05           |
| Up  | John04_mmu-miR-291_5p      | 1              | 6.92E-04 | 57       | 2148     | 2.66         | 739        | 43407      | 1.71           |
| Up  | Targetscan_hsa-miR-219     | 1              | 6.13E-03 | 54       | 2148     | 2.52         | 766        | 43407      | 1.77           |
| Up  | John04_hsa-miR-30c         | 1              | 8.29E-03 | 59       | 2148     | 2.75         | 864        | 43407      | 2              |
| Up  | John04_hsa-miR-30e         | 1              | 6.78E-03 | 66       | 2148     | 3.08         | 976        | 43407      | 2.25           |
| Up  | Pictar_hsa-miR-205         | 1              | 2.92E-04 | 62       | 2148     | 2.89         | 793        | 43407      | 1.83           |
| Up  | Targetscan_hsa-miR-18      | 1              | 1.30E-03 | 42       | 2148     | 1.96         | 518        | 43407      | 1.2            |
| Up  | Targetscan_hsa-miR-205     | 1              | 4.48E-07 | 72       | 2148     | 3.36         | 785        | 43407      | 1.81           |
| Up  | Targetscan_hsa-miR-486     | 1              | 1.32E-04 | 31       | 2148     | 1.45         | 305        | 43407      | 0.71           |
| Up  | John04_hsa-miR-30b         | 1              | 7.86E-03 | 51       | 2148     | 2.38         | 725        | 43407      | 1.68           |
| Up  | Targetscan_hsa-miR-485-5p  | 1              | 1.40E-04 | 45       | 2148     | 2.1          | 509        | 43407      | 1.18           |
| Up  | Targetscan_hsa-miR-140     | 1              | 8.18E-03 | 38       | 2148     | 1.77         | 509        | 43407      | 1.18           |
| Up  | John04_hsa-miR-208         | 1              | 4.23E-03 | 26       | 2148     | 1.22         | 300        | 43407      | 0.7            |
| Up  | Targetscan_hsa-miR-329     | 1              | 3.03E-03 | 52       | 2148     | 2.43         | 706        | 43407      | 1.63           |
| Up  | SloanKettering_hsa-miR-135 | 1              | 3.07E-03 | 15       | 2148     | 0.7          | 136        | 43407      | 0.32           |

| Set | Enriched Set                | Enriched Value | P-value  | Set Hits | Set Size | Set Hits (%) | Total Hits | Total Size | Total Hits (%) |
|-----|-----------------------------|----------------|----------|----------|----------|--------------|------------|------------|----------------|
| Up  | John04_rno-miR-345          | 1              | 3.10E-03 | 19       | 2148     | 0.89         | 191        | 43407      | 0.45           |
| Up  | Pictar_hsa-miR-150          | 1              | 1.35E-04 | 53       | 2148     | 2.47         | 630        | 43407      | 1.46           |
| Up  | Pictar_hsa-miR-185          | 1              | 1.42E-03 | 62       | 2148     | 2.89         | 845        | 43407      | 1.95           |
| Up  | Targetscan_hsa-miR-136      | 1              | 5.89E-03 | 31       | 2148     | 1.45         | 386        | 43407      | 0.89           |
| Up  | Targetscan_hsa-miR-210      | 1              | 7.84E-04 | 8        | 2148     | 0.38         | 41         | 43407      | 0.1            |
| Up  | SloanKettering_hsa-miR-181a | 1              | 5.31E-03 | 16       | 2148     | 0.75         | 158        | 43407      | 0.37           |
| Up  | Pictar_hsa-miR-21           | 1              | 4.97E-06 | 50       | 2148     | 2.33         | 514        | 43407      | 1.19           |
| Up  | Targetscan_hsa-miR-21       | 1              | 9.77E-05 | 49       | 2148     | 2.29         | 561        | 43407      | 1.3            |
| Up  | Targetscan_hsa-miR-503      | 1              | 9.91E-08 | 80       | 2148     | 3.73         | 871        | 43407      | 2.01           |
| Up  | Pictar_hsa-miR-30a-3p       | 1              | 7.84E-03 | 54       | 2148     | 2.52         | 776        | 43407      | 1.79           |
| Up  | Pictar_hsa-miR-30e-3p       | 1              | 6.77E-03 | 54       | 2148     | 2.52         | 770        | 43407      | 1.78           |
| Up  | Targetscan_hsa-miR-30-3p    | 1              | 5.30E-04 | 71       | 2148     | 3.31         | 959        | 43407      | 2.21           |
| Up  | Pictar_hsa-miR-146b         | 1              | 1.06E-07 | 44       | 2148     | 2.05         | 373        | 43407      | 0.86           |
| Up  | Pictar_hsa-miR-146a         | 1              | 5.50E-08 | 46       | 2148     | 2.15         | 390        | 43407      | 0.9            |
| Up  | Targetscan_hsa-miR-146      | 1              | 2.61E-09 | 49       | 2148     | 2.29         | 390        | 43407      | 0.9            |



| Set | Enriched Set               | Enriched Value | P-value  | Set Hits | Set Size | Set Hits (%) | Total Hits | Total Size | Total Hits (%) |
|-----|----------------------------|----------------|----------|----------|----------|--------------|------------|------------|----------------|
| Up  | Targetscan_hsa-miR-377     | 1              | 1.29E-03 | 63       | 2148     | 2.94         | 858        | 43407      | 1.98           |
| Up  | John04_hsa-miR-137         | 1              | 5.65E-03 | 41       | 2148     | 1.91         | 546        | 43407      | 1.26           |
| Up  | Pictar_hsa-miR-335         | 1              | 5.03E-04 | 40       | 2148     | 1.87         | 463        | 43407      | 1.07           |
| Up  | Targetscan_hsa-miR-335     | 1              | 2.45E-05 | 46       | 2148     | 2.15         | 487        | 43407      | 1.13           |
| Up  | Targetscan_hsa-miR-193     | 1              | 3.30E-03 | 36       | 2148     | 1.68         | 449        | 43407      | 1.04           |
| Up  | SloanKettering_hsa-miR-145 | 1              | 7.50E-07 | 15       | 2148     | 0.7          | 67         | 43407      | 0.16           |
| Up  | Pictar_hsa-miR-18a         | 1              | 8.24E-04 | 42       | 2148     | 1.96         | 506        | 43407      | 1.17           |
| Up  | Pictar_hsa-miR-18b         | 1              | 2.06E-03 | 41       | 2148     | 1.91         | 515        | 43407      | 1.19           |
| Up  | Targetscan_hsa-miR-139     | 1              | 1.03E-03 | 54       | 2148     | 2.52         | 703        | 43407      | 1.62           |
| Up  | SloanKettering_hsa-miR-19a | 1              | 2.96E-03 | 26       | 2148     | 1.22         | 292        | 43407      | 0.68           |
| Up  | SloanKettering_hsa-miR-1   | 1              | 7.19E-03 | 15       | 2148     | 0.7          | 149        | 43407      | 0.35           |
| Up  | SloanKettering_hsa-miR-19b | 1              | 1.11E-05 | 30       | 2148     | 1.4          | 255        | 43407      | 0.59           |
| Up  | SloanKettering_hsa-miR-206 | 1              | 2.30E-03 | 15       | 2148     | 0.7          | 132        | 43407      | 0.31           |
| Up  | John04_hsa-miR-194         | 1              | 8.34E-05 | 56       | 2148     | 2.61         | 664        | 43407      | 1.53           |
| Up  | John04_hsa-miR-205         | 1              | 1.35E-03 | 42       | 2148     | 1.96         | 519        | 43407      | 1.2            |

| Set | Enriched Set               | Enriched Value | P-value  | Set Hits | Set Size | Set Hits (%) | Total Hits | Total Size | Total Hits (%) |
|-----|----------------------------|----------------|----------|----------|----------|--------------|------------|------------|----------------|
| Up  | John04_mmu-miR-290         | 1              | 1.80E-03 | 44       | 2148     | 2.05         | 559        | 43407      | 1.29           |
| Up  | Pictar_hsa-miR-221         | 1              | 6.66E-04 | 58       | 2148     | 2.71         | 754        | 43407      | 1.74           |
| Up  | Pictar_hsa-miR-222         | 1              | 1.64E-03 | 54       | 2148     | 2.52         | 718        | 43407      | 1.66           |
| Up  | Pictar_hsa-miR-187         | 1              | 2.74E-03 | 7        | 2148     | 0.33         | 39         | 43407      | 0.09           |
| Up  | Targetscan_hsa-miR-191     | 1              | 1.58E-03 | 13       | 2148     | 0.61         | 102        | 43407      | 0.24           |
| Up  | SloanKettering_hsa-miR-26a | 1              | 3.30E-04 | 21       | 2148     | 0.98         | 184        | 43407      | 0.43           |
| Up  | John04_hsa-miR-150         | 1              | 6.16E-03 | 32       | 2148     | 1.49         | 403        | 43407      | 0.93           |
| Up  | John04_hsa-miR-26a         | 1              | 1.48E-06 | 83       | 2148     | 3.87         | 978        | 43407      | 2.26           |
| Up  | John04_hsa-miR-26b         | 1              | 2.57E-06 | 83       | 2148     | 3.87         | 992        | 43407      | 2.29           |
| Up  | Targetscan_hsa-miR-485-3p  | 1              | 6.37E-03 | 41       | 2148     | 1.91         | 550        | 43407      | 1.27           |
| Up  | Targetscan_hsa-miR-192     | 1              | 5.19E-07 | 39       | 2148     | 1.82         | 330        | 43407      | 0.77           |
| Up  | Pictar_hsa-miR-22          | 1              | 1.50E-03 | 65       | 2148     | 3.03         | 897        | 43407      | 2.07           |
| Up  | Targetscan_hsa-miR-542-3p  | 1              | 8.50E-05 | 51       | 2148     | 2.38         | 588        | 43407      | 1.36           |
| Up  | Targetscan_hsa-miR-452     | 1              | 1.78E-03 | 41       | 2148     | 1.91         | 511        | 43407      | 1.18           |
| Up  | Targetscan_hsa-miR-221     | 1              | 9.92E-04 | 55       | 2148     | 2.57         | 718        | 43407      | 1.66           |

| Set | Enriched Set               | Enriched Value | P-value  | Set Hits | Set Size | Set Hits (%) | Total Hits | Total Size | Total Hits (%) |
|-----|----------------------------|----------------|----------|----------|----------|--------------|------------|------------|----------------|
| Up  | SloanKettering_hsa-miR-9   | 1              | 6.76E-03 | 21       | 2148     | 0.98         | 235        | 43407      | 0.55           |
| Up  | SloanKettering_hsa-miR-150 | 1              | 6.06E-03 | 8        | 2148     | 0.38         | 56         | 43407      | 0.13           |
| Up  | SloanKettering_hsa-miR-15a | 1              | 3.07E-03 | 20       | 2148     | 0.94         | 205        | 43407      | 0.48           |
| Up  | SloanKettering_hsa-miR-15b | 1              | 1.72E-03 | 21       | 2148     | 0.98         | 209        | 43407      | 0.49           |
| Up  | John04_hsa-miR-23b         | 1              | 3.16E-03 | 66       | 2148     | 3.08         | 943        | 43407      | 2.18           |
| Up  | SloanKettering_hsa-miR-29c | 1              | 3.48E-03 | 19       | 2148     | 0.89         | 193        | 43407      | 0.45           |
| Up  | SloanKettering_hsa-let-7f  | 1              | 1.62E-05 | 19       | 2148     | 0.89         | 127        | 43407      | 0.3            |
| Up  | SloanKettering_hsa-miR-29a | 1              | 1.08E-03 | 14       | 2148     | 0.66         | 110        | 43407      | 0.26           |
| Up  | Pictar_hsa-miR-217         | 1              | 7.97E-04 | 49       | 2148     | 2.29         | 615        | 43407      | 1.42           |
| Up  | SloanKettering_hsa-let-7e  | 1              | 2.68E-03 | 14       | 2148     | 0.66         | 121        | 43407      | 0.28           |
| Up  | SloanKettering_hsa-let-7g  | 1              | 5.02E-05 | 18       | 2148     | 0.84         | 126        | 43407      | 0.3            |
| Up  | Targetscan_hsa-miR-189     | 1              | 2.31E-04 | 27       | 2148     | 1.26         | 259        | 43407      | 0.6            |
| Up  | SloanKettering_hsa-let-7a  | 1              | 9.30E-04 | 17       | 2148     | 0.8          | 146        | 43407      | 0.34           |
| Up  | Pictar_hsa-miR-302a-star   | 1              | 9.57E-04 | 15       | 2148     | 0.7          | 121        | 43407      | 0.28           |
| Up  | John04_mmu-miR-292_3p      | 1              | 9.28E-04 | 21       | 2148     | 0.98         | 199        | 43407      | 0.46           |

| <b>Set</b> | <b>Enriched Set</b>            | <b>Enriched Value</b> | <b>P-value</b> | <b>Set Hits</b> | <b>Set Size</b> | <b>Set Hits (%)</b> | <b>Total Hits</b> | <b>Total Size</b> | <b>Total Hits (%)</b> |
|------------|--------------------------------|-----------------------|----------------|-----------------|-----------------|---------------------|-------------------|-------------------|-----------------------|
| Up         | SloanKettering_<br>hsa-miR-7   | 1                     | 1.20E-<br>03   | 13              | 2148            | 0.61                | 99                | 43407             | 0.23                  |
| Up         | SloanKettering_<br>hsa-miR-363 | 1                     | 9.07E-<br>04   | 6               | 2148            | 0.28                | 24                | 43407             | 0.06                  |
| Up         | SloanKettering_r<br>no-miR-352 | 1                     | 5.10E-<br>03   | 6               | 2148            | 0.28                | 33                | 43407             | 0.08                  |
| Up         | SloanKettering_<br>hsa-miR-221 | 1                     | 1.85E-<br>05   | 12              | 2148            | 0.56                | 57                | 43407             | 0.14                  |

**Supplementary Table 5. Microarray expression levels of pre-transfected HEY cell miRNAs.** Signal values from Affymetrix microarray analysis of miRNA expression from pre-transfected HEY cells. ‘Probeset name’ refers to the unique Affymetrix identifier for sequences on the chip. The log<sub>2</sub> transformed ‘signal’ values for each probeset (‘Hey cell Signal\_1’ and ‘Hey cell Signal\_2’) and the p-value of detection [‘p-value (Hey cell Signal\_1)’ and ‘p-value (Hey cell Signal\_2)’] is also shown. Signal values with Wilcoxon p < 0.06 of detection are called “TRUE” [under ‘Detection (Hey cell Signal\_1)’ and ‘Detection (Hey cell Signal\_2)’]. The ‘mean signal’ column shows the average of the log<sub>2</sub> signal values from the 2 ‘Hey cell Signal (\_1 and \_2)’ columns. Data shown are for human miRNAs (with hsa- prefix) only.

| ProbeSet Name        | Hey cell Signal_1 | p-value (Hey cell Signal_1) | Detection (Hey cell Signal_1) | Hey cell Signal_2 | p-value (Hey cell Signal_2) | Detection (Hey cell Signal_2) | Mean signal |
|----------------------|-------------------|-----------------------------|-------------------------------|-------------------|-----------------------------|-------------------------------|-------------|
| hsa-let-7a_st        | 13.25778          | 2.05E-08                    | TRUE                          | 13.14588          | 2.05E-08                    | TRUE                          | 13.20183    |
| hsa-let-7a-star_st   | 4.058473          | 0.6218237                   | FALSE                         | 4.199147          | 0.3329969                   | FALSE                         | 4.12881     |
| hsa-let-7b_st        | 13.14117          | 2.05E-08                    | TRUE                          | 13.0817           | 2.05E-08                    | TRUE                          | 13.111435   |
| hsa-let-7b-star_st   | 4.409339          | 0.137066                    | FALSE                         | 4.378109          | 0.1409812                   | FALSE                         | 4.393724    |
| hsa-let-7c_st        | 12.93934          | 2.05E-08                    | TRUE                          | 12.91432          | 2.05E-08                    | TRUE                          | 12.92683    |
| hsa-let-7c-star_st   | 4.030557          | 0.549224                    | FALSE                         | 4.071347          | 0.5779037                   | FALSE                         | 4.050952    |
| hsa-let-7d_st        | 12.64366          | 2.05E-08                    | TRUE                          | 12.59471          | 2.05E-08                    | TRUE                          | 12.619185   |
| hsa-let-7d-star_st   | 5.527161          | 0.001760183                 | TRUE                          | 5.330665          | 0.004321587                 | TRUE                          | 5.428913    |
| hsa-let-7e_st        | 11.43213          | 2.05E-08                    | TRUE                          | 11.57724          | 2.05E-08                    | TRUE                          | 11.504685   |
| hsa-let-7e-star_st   | 5.427573          | 0.01135333                  | TRUE                          | 5.291793          | 0.009632347                 | TRUE                          | 5.359683    |
| hsa-let-7f_st        | 11.3144           | 2.13E-08                    | TRUE                          | 10.91715          | 2.13E-08                    | TRUE                          | 11.115775   |
| hsa-let-7f-1-star_st | 4.35369           | 0.245166                    | FALSE                         | 4.324418          | 0.2616047                   | FALSE                         | 4.339054    |
| hsa-let-7f-2-star_st | 3.810567          | 0.9163727                   | FALSE                         | 3.728485          | 0.9709982                   | FALSE                         | 3.769526    |
| hsa-let-7g_st        | 11.06676          | 2.05E-08                    | TRUE                          | 10.47923          | 2.05E-08                    | TRUE                          | 10.772995   |
| hsa-let-7g-star_st   | 4.645726          | 0.170433                    | FALSE                         | 5.018413          | 0.05029794                  | TRUE                          | 4.8320695   |
| hsa-let-7i_st        | 12.87767          | 2.05E-08                    | TRUE                          | 12.69815          | 2.05E-08                    | TRUE                          | 12.78791    |
| hsa-let-7i-star_st   | 4.897941          | 0.03327993                  | TRUE                          | 4.186187          | 0.3906482                   | FALSE                         | 4.542064    |
| hsa-miR-1_st         | 3.919921          | 0.5825235                   | FALSE                         | 3.746041          | 0.888293                    | FALSE                         | 3.832981    |
| hsa-miR-100_st       | 14.07139          | 2.05E-08                    | TRUE                          | 14.09498          | 2.05E-08                    | TRUE                          | 14.083185   |
| hsa-miR-100-star_st  | 6.260762          | 3.52E-06                    | TRUE                          | 5.568634          | 0.001586907                 | TRUE                          | 5.914698    |
| hsa-miR-101_st       | 3.870145          | 0.7124807                   | FALSE                         | 3.967698          | 0.4037512                   | FALSE                         | 3.9189215   |
| hsa-miR-101-star_st  | 3.888543          | 0.5564451                   | FALSE                         | 3.874936          | 0.7983921                   | FALSE                         | 3.8817395   |

| ProbeSet Name        | Hey cell Signal_1 | p-value (Hey cell Signal_1) | Detection (Hey cell Signal_1) | Hey cell Signal_2 | p-value (Hey cell Signal_2) | Detection (Hey cell Signal_2) | Mean signal |
|----------------------|-------------------|-----------------------------|-------------------------------|-------------------|-----------------------------|-------------------------------|-------------|
| hsa-miR-103_st       | 13.03601          | 2.05E-08                    | TRUE                          | 13.16777          | 2.05E-08                    | TRUE                          | 13.10189    |
| hsa-miR-105_st       | 4.294719          | 0.2920117                   | FALSE                         | 4.272607          | 0.3006915                   | FALSE                         | 4.283663    |
| hsa-miR-105-star_st  | 3.805122          | 0.7550848                   | FALSE                         | 3.711114          | 0.7884334                   | FALSE                         | 3.758118    |
| hsa-miR-106a_st      | 13.93984          | 2.05E-08                    | TRUE                          | 14.10852          | 2.05E-08                    | TRUE                          | 14.02418    |
| hsa-miR-106a-star_st | 3.92974           | 0.8195356                   | FALSE                         | 3.710705          | 0.9759511                   | FALSE                         | 3.8202225   |
| hsa-miR-106b_st      | 11.75925          | 2.05E-08                    | TRUE                          | 11.69164          | 2.05E-08                    | TRUE                          | 11.725445   |
| hsa-miR-106b-star_st | 8.863229          | 0.000552592                 | TRUE                          | 8.751545          | 0.000483581                 | TRUE                          | 8.807387    |
| hsa-miR-107_st       | 12.85947          | 2.05E-08                    | TRUE                          | 13.03369          | 2.05E-08                    | TRUE                          | 12.94658    |
| hsa-miR-10a_st       | 10.22714          | 2.05E-08                    | TRUE                          | 10.30341          | 2.05E-08                    | TRUE                          | 10.265275   |
| hsa-miR-10a-star_st  | 6.144808          | 8.41E-06                    | TRUE                          | 5.834525          | 3.77E-05                    | TRUE                          | 5.9896665   |
| hsa-miR-10b_st       | 7.696976          | 2.05E-08                    | TRUE                          | 7.486101          | 3.54E-07                    | TRUE                          | 7.5915385   |
| hsa-miR-10b-star_st  | 5.559112          | 0.000694596                 | TRUE                          | 5.987772          | 0.000138725                 | TRUE                          | 5.773442    |
| hsa-miR-1178_st      | 3.974417          | 0.7396107                   | FALSE                         | 3.890355          | 0.8296705                   | FALSE                         | 3.932386    |
| hsa-miR-1179_st      | 3.932132          | 0.7966915                   | FALSE                         | 3.844566          | 0.9294101                   | FALSE                         | 3.888349    |
| hsa-miR-1180_st      | 6.958779          | 0.00515984                  | TRUE                          | 7.104779          | 0.004285616                 | TRUE                          | 7.031779    |
| hsa-miR-1181_st      | 3.779994          | 0.7555314                   | FALSE                         | 3.737576          | 0.6660923                   | FALSE                         | 3.758785    |
| hsa-miR-1182_st      | 4.461731          | 0.2271221                   | FALSE                         | 3.692998          | 0.8128802                   | FALSE                         | 4.0773645   |
| hsa-miR-1183_st      | 4.053176          | 0.5788962                   | FALSE                         | 3.875713          | 0.5961379                   | FALSE                         | 3.9644445   |
| hsa-miR-1184_st      | 4.093147          | 0.5001072                   | FALSE                         | 4.013458          | 0.6001728                   | FALSE                         | 4.0533025   |
| hsa-miR-1185_st      | 3.991694          | 0.3999361                   | FALSE                         | 4.076181          | 0.3024583                   | FALSE                         | 4.0339375   |
| hsa-miR-1197_st      | 3.782105          | 0.7387544                   | FALSE                         | 3.935822          | 0.7017496                   | FALSE                         | 3.8589635   |
| hsa-miR-1200_st      | 3.877525          | 0.8570771                   | FALSE                         | 3.908956          | 0.7988055                   | FALSE                         | 3.8932405   |
| hsa-miR-1201_st      | 8.313408          | 2.05E-08                    | TRUE                          | 7.806952          | 1.33E-07                    | TRUE                          | 8.06018     |
| hsa-miR-1202_st      | 4.814062          | 0.142928                    | FALSE                         | 4.554039          | 0.1449084                   | FALSE                         | 4.6840505   |
| hsa-miR-1203_st      | 3.627222          | 0.7065709                   | FALSE                         | 3.905005          | 0.6614579                   | FALSE                         | 3.7661135   |
| hsa-miR-1204_st      | 3.67434           | 0.9823341                   | FALSE                         | 3.70108           | 0.8614276                   | FALSE                         | 3.68771     |
| hsa-miR-1205_st      | 3.702563          | 0.9120726                   | FALSE                         | 3.651854          | 0.9955559                   | FALSE                         | 3.6772085   |
| hsa-miR-1206_st      | 3.986838          | 0.8666963                   | FALSE                         | 3.766152          | 0.8979182                   | FALSE                         | 3.876495    |
| hsa-miR-1207-3p_st   | 3.734989          | 0.7950026                   | FALSE                         | 3.738982          | 0.8480401                   | FALSE                         | 3.7369855   |
| hsa-miR-1207-5p_st   | 8.653416          | 0.001845067                 | TRUE                          | 8.32209           | 0.002747166                 | TRUE                          | 8.487753    |
| hsa-miR-1208_st      | 5.364491          | 0.00501359                  | TRUE                          | 4.78966           | 0.03148764                  | TRUE                          | 5.0770755   |
| hsa-miR-122_st       | 3.838904          | 0.8929132                   | FALSE                         | 4.051953          | 0.7738851                   | FALSE                         | 3.9454285   |
| hsa-miR-1224-3p_st   | 4.270638          | 0.5355817                   | FALSE                         | 4.288438          | 0.3161747                   | FALSE                         | 4.279538    |
| hsa-miR-1224-5p_st   | 5.341234          | 0.02300812                  | TRUE                          | 4.790774          | 0.07816555                  | FALSE                         | 5.066004    |
| hsa-miR-1225-3p_st   | 3.458519          | 0.8187156                   | FALSE                         | 3.760551          | 0.6525635                   | FALSE                         | 3.609535    |
| hsa-miR-1225-5p_st   | 7.544112          | 0.01889602                  | TRUE                          | 6.706877          | 0.03248493                  | TRUE                          | 7.1254945   |
| hsa-miR-1226_st      | 4.487405          | 0.3054223                   | FALSE                         | 4.695328          | 0.1295467                   | FALSE                         | 4.5913665   |
| hsa-miR-1226-star_st | 5.053464          | 0.1985627                   | FALSE                         | 4.17711           | 0.3913439                   | FALSE                         | 4.615287    |
| hsa-miR-1227_st      | 4.314933          | 0.3407527                   | FALSE                         | 3.845557          | 0.7894204                   | FALSE                         | 4.080245    |
| hsa-miR-1228_st      | 4.84207           | 0.1639514                   | FALSE                         | 4.998221          | 0.1097067                   | FALSE                         | 4.9201455   |

| ProbeSet Name          | Hey cell Signal_1 | p-value (Hey cell Signal_1) | Detection (Hey cell Signal_1) | Hey cell Signal_2 | p-value (Hey cell Signal_2) | Detection (Hey cell Signal_2) | Mean signal |
|------------------------|-------------------|-----------------------------|-------------------------------|-------------------|-----------------------------|-------------------------------|-------------|
| hsa-miR-1228-star_st   | 10.60605          | 5.12E-05                    | TRUE                          | 10.94761          | 2.48E-05                    | TRUE                          | 10.77683    |
| hsa-miR-1229_st        | 3.91684           | 0.6293426                   | FALSE                         | 4.161025          | 0.4948559                   | FALSE                         | 4.0389325   |
| hsa-miR-122-star_st    | 4.120712          | 0.7870396                   | FALSE                         | 4.228479          | 0.4941563                   | FALSE                         | 4.1745955   |
| hsa-miR-1231_st        | 7.792675          | 0.001750734                 | TRUE                          | 8.064671          | 0.001184275                 | TRUE                          | 7.928673    |
| hsa-miR-1233_st        | 3.923553          | 0.6287264                   | FALSE                         | 4.06652           | 0.5045198                   | FALSE                         | 3.9950365   |
| hsa-miR-1234_st        | 4.696789          | 0.2935984                   | FALSE                         | 4.375046          | 0.3910246                   | FALSE                         | 4.5359175   |
| hsa-miR-1236_st        | 4.399593          | 0.347063                    | FALSE                         | 4.345309          | 0.2734794                   | FALSE                         | 4.372451    |
| hsa-miR-1237_st        | 4.430656          | 0.293526                    | FALSE                         | 4.332287          | 0.2284614                   | FALSE                         | 4.3814715   |
| hsa-miR-1238_st        | 4.300852          | 0.2180848                   | FALSE                         | 4.241601          | 0.3589978                   | FALSE                         | 4.2712265   |
| hsa-miR-124_st         | 4.239136          | 0.3525625                   | FALSE                         | 4.26461           | 0.3939606                   | FALSE                         | 4.251873    |
| hsa-miR-1243_st        | 3.938997          | 0.7556437                   | FALSE                         | 4.16093           | 0.514423                    | FALSE                         | 4.0499635   |
| hsa-miR-1244_st        | 3.948797          | 0.3163179                   | FALSE                         | 4.201441          | 0.2336573                   | FALSE                         | 4.075119    |
| hsa-miR-1245_st        | 4.049077          | 0.1324202                   | FALSE                         | 4.22826           | 0.09840415                  | FALSE                         | 4.1386685   |
| hsa-miR-1246_st        | 9.884957          | 2.05E-08                    | TRUE                          | 8.966446          | 2.05E-08                    | TRUE                          | 9.4257015   |
| hsa-miR-1247_st        | 3.800135          | 0.7462912                   | FALSE                         | 3.812388          | 0.7090199                   | FALSE                         | 3.8062615   |
| hsa-miR-1248_st        | 4.377492          | 0.07883506                  | FALSE                         | 4.520214          | 0.08112705                  | FALSE                         | 4.448853    |
| hsa-miR-1249_st        | 4.014685          | 0.4585056                   | FALSE                         | 4.074961          | 0.4501922                   | FALSE                         | 4.044823    |
| hsa-miR-124-star_st    | 3.811332          | 0.8721417                   | FALSE                         | 3.949465          | 0.8638604                   | FALSE                         | 3.8803985   |
| hsa-miR-1250_st        | 3.8864            | 0.7443426                   | FALSE                         | 4.049546          | 0.585423                    | FALSE                         | 3.967973    |
| hsa-miR-1251_st        | 3.698272          | 0.8367361                   | FALSE                         | 3.730442          | 0.8900133                   | FALSE                         | 3.714357    |
| hsa-miR-1252_st        | 3.876377          | 0.6551263                   | FALSE                         | 3.881181          | 0.7928174                   | FALSE                         | 3.878779    |
| hsa-miR-1253_st        | 4.126504          | 0.3782144                   | FALSE                         | 3.809846          | 0.9235324                   | FALSE                         | 3.968175    |
| hsa-miR-1254_st        | 5.219257          | 0.09052552                  | FALSE                         | 5.72315           | 0.04081295                  | TRUE                          | 5.4712035   |
| hsa-miR-1255a_st       | 4.141746          | 0.3478979                   | FALSE                         | 3.835788          | 0.8410297                   | FALSE                         | 3.988767    |
| hsa-miR-1255b_st       | 4.013327          | 0.5249751                   | FALSE                         | 3.881932          | 0.6204208                   | FALSE                         | 3.9476295   |
| hsa-miR-1256_st        | 3.960435          | 0.6259312                   | FALSE                         | 4.304706          | 0.2074982                   | FALSE                         | 4.1325705   |
| hsa-miR-1257_st        | 4.022422          | 0.4334977                   | FALSE                         | 4.044281          | 0.4058984                   | FALSE                         | 4.0333515   |
| hsa-miR-1258_st        | 3.729508          | 0.955588                    | FALSE                         | 4.068294          | 0.5403249                   | FALSE                         | 3.898901    |
| hsa-miR-1259_st        | 3.904502          | 0.5423377                   | FALSE                         | 3.922356          | 0.3573198                   | FALSE                         | 3.913429    |
| hsa-miR-125a-3p_st     | 7.0344            | 0.00034341                  | TRUE                          | 7.180879          | 0.000247674                 | TRUE                          | 7.1076395   |
| hsa-miR-125a-5p_st     | 12.39773          | 2.05E-08                    | TRUE                          | 12.21575          | 2.05E-08                    | TRUE                          | 12.30674    |
| hsa-miR-125b_st        | 14.0486           | 2.05E-08                    | TRUE                          | 13.95277          | 2.05E-08                    | TRUE                          | 14.000685   |
| hsa-miR-125b-1-star_st | 9.182639          | 9.38E-06                    | TRUE                          | 9.374179          | 8.56E-06                    | TRUE                          | 9.278409    |
| hsa-miR-125b-2-star_st | 5.972874          | 0.001100614                 | TRUE                          | 6.316291          | 0.000946953                 | TRUE                          | 6.1445825   |
| hsa-miR-126_st         | 9.391552          | 2.05E-08                    | TRUE                          | 9.144051          | 2.05E-08                    | TRUE                          | 9.2678015   |
| hsa-miR-1260_st        | 5.471249          | 0.005962729                 | TRUE                          | 5.700044          | 0.000411837                 | TRUE                          | 5.5856465   |
| hsa-miR-1261_st        | 3.745836          | 0.8384898                   | FALSE                         | 3.789426          | 0.9800241                   | FALSE                         | 3.767631    |
| hsa-miR-1262_st        | 4.529433          | 0.04446588                  | TRUE                          | 4.840852          | 0.02889414                  | TRUE                          | 4.6851425   |
| hsa-miR-1263_st        | 4.116495          | 0.1085121                   | FALSE                         | 3.876593          | 0.4011238                   | FALSE                         | 3.996544    |
| hsa-miR-1264_st        | 4.063839          | 0.4239051                   | FALSE                         | 3.793446          | 0.9294156                   | FALSE                         | 3.9286425   |

| ProbeSet Name       | Hey cell Signal_1 | p-value (Hey cell Signal_1) | Detection (Hey cell Signal_1) | Hey cell Signal_2 | p-value (Hey cell Signal_2) | Detection (Hey cell Signal_2) | Mean signal |
|---------------------|-------------------|-----------------------------|-------------------------------|-------------------|-----------------------------|-------------------------------|-------------|
| hsa-miR-1265_st     | 3.592929          | 0.9322825                   | FALSE                         | 3.837762          | 0.9109658                   | FALSE                         | 3.7153455   |
| hsa-miR-1266_st     | 4.527523          | 0.1902611                   | FALSE                         | 4.173364          | 0.4073615                   | FALSE                         | 4.3504435   |
| hsa-miR-1267_st     | 4.475516          | 0.06970482                  | FALSE                         | 4.400655          | 0.1599331                   | FALSE                         | 4.4380855   |
| hsa-miR-1268_st     | 7.597053          | 0.00291815                  | TRUE                          | 8.140071          | 0.001251397                 | TRUE                          | 7.868562    |
| hsa-miR-1269_st     | 3.572433          | 0.8902153                   | FALSE                         | 3.71034           | 0.7670372                   | FALSE                         | 3.6413865   |
| hsa-miR-126-star_st | 3.729451          | 0.9558689                   | FALSE                         | 3.515414          | 0.9929667                   | FALSE                         | 3.6224325   |
| hsa-miR-1270_st     | 3.886401          | 0.4144686                   | FALSE                         | 3.931901          | 0.4383041                   | FALSE                         | 3.909151    |
| hsa-miR-1271_st     | 3.729445          | 0.5433474                   | FALSE                         | 3.712057          | 0.6966677                   | FALSE                         | 3.720751    |
| hsa-miR-1272_st     | 4.382951          | 0.09444676                  | FALSE                         | 4.099275          | 0.2931413                   | FALSE                         | 4.241113    |
| hsa-miR-1273_st     | 4.030603          | 0.3828007                   | FALSE                         | 4.040782          | 0.4107601                   | FALSE                         | 4.0356925   |
| hsa-miR-127-3p_st   | 3.495043          | 0.9688597                   | FALSE                         | 3.720772          | 0.8178636                   | FALSE                         | 3.6079075   |
| hsa-miR-1274a_st    | 8.138761          | 1.17E-05                    | TRUE                          | 8.362957          | 1.17E-05                    | TRUE                          | 8.250859    |
| hsa-miR-1274b_st    | 7.348765          | 3.45E-05                    | TRUE                          | 6.86198           | 0.000257899                 | TRUE                          | 7.1053725   |
| hsa-miR-1275_st     | 7.663939          | 1.17E-05                    | TRUE                          | 7.900241          | 1.17E-05                    | TRUE                          | 7.78209     |
| hsa-miR-127-5p_st   | 4.209868          | 0.4239683                   | FALSE                         | 3.761409          | 0.7911346                   | FALSE                         | 3.9856385   |
| hsa-miR-1276_st     | 4.046614          | 0.4669642                   | FALSE                         | 3.973763          | 0.3821809                   | FALSE                         | 4.0101885   |
| hsa-miR-1277_st     | 4.083542          | 0.3544721                   | FALSE                         | 3.744227          | 0.8674582                   | FALSE                         | 3.9138845   |
| hsa-miR-1278_st     | 4.12065           | 0.4326709                   | FALSE                         | 3.991508          | 0.6125289                   | FALSE                         | 4.056079    |
| hsa-miR-1279_st     | 4.162684          | 0.3757135                   | FALSE                         | 3.775079          | 0.9380397                   | FALSE                         | 3.9688815   |
| hsa-miR-128_st      | 8.089877          | 2.05E-08                    | TRUE                          | 8.033474          | 3.83E-08                    | TRUE                          | 8.0616755   |
| hsa-miR-1280_st     | 8.216311          | 6.76E-05                    | TRUE                          | 8.102686          | 6.19E-05                    | TRUE                          | 8.1594985   |
| hsa-miR-1281_st     | 6.652599          | 0.000255581                 | TRUE                          | 6.413093          | 0.000839763                 | TRUE                          | 6.532846    |
| hsa-miR-1282_st     | 4.102411          | 0.4649099                   | FALSE                         | 4.086248          | 0.6929181                   | FALSE                         | 4.0943295   |
| hsa-miR-1283_st     | 3.747735          | 0.8038064                   | FALSE                         | 3.7669            | 0.8291143                   | FALSE                         | 3.7573175   |
| hsa-miR-1284_st     | 4.019132          | 0.4973205                   | FALSE                         | 4.216774          | 0.316926                    | FALSE                         | 4.117953    |
| hsa-miR-1285_st     | 5.349429          | 0.008000197                 | TRUE                          | 5.446939          | 0.002150405                 | TRUE                          | 5.398184    |
| hsa-miR-1286_st     | 4.244865          | 0.244649                    | FALSE                         | 3.795718          | 0.8610238                   | FALSE                         | 4.0202915   |
| hsa-miR-1287_st     | 5.663781          | 0.005813187                 | TRUE                          | 5.813761          | 0.00295949                  | TRUE                          | 5.738771    |
| hsa-miR-1288_st     | 4.225593          | 0.3122947                   | FALSE                         | 4.476561          | 0.2064401                   | FALSE                         | 4.351077    |
| hsa-miR-1289_st     | 4.063657          | 0.4669278                   | FALSE                         | 3.850991          | 0.5181684                   | FALSE                         | 3.957324    |
| hsa-miR-1290_st     | 4.008868          | 0.6761907                   | FALSE                         | 4.095496          | 0.5372359                   | FALSE                         | 4.052182    |
| hsa-miR-1291_st     | 4.18479           | 0.4550874                   | FALSE                         | 3.878307          | 0.6384108                   | FALSE                         | 4.0315485   |
| hsa-miR-1292_st     | 5.063153          | 0.1859845                   | FALSE                         | 5.003838          | 0.1942677                   | FALSE                         | 5.0334955   |
| hsa-miR-1293_st     | 3.77933           | 0.8927168                   | FALSE                         | 4.15137           | 0.4858351                   | FALSE                         | 3.96535     |
| hsa-miR-129-3p_st   | 6.216746          | 5.12E-05                    | TRUE                          | 6.319264          | 6.27E-05                    | TRUE                          | 6.268005    |
| hsa-miR-1294_st     | 4.079598          | 0.3155612                   | FALSE                         | 4.091678          | 0.5383502                   | FALSE                         | 4.085638    |
| hsa-miR-1295_st     | 4.20998           | 0.5053571                   | FALSE                         | 3.894757          | 0.7394715                   | FALSE                         | 4.0523685   |
| hsa-miR-129-5p_st   | 5.932788          | 0.002162432                 | TRUE                          | 6.52132           | 0.000758512                 | TRUE                          | 6.227054    |
| hsa-miR-1296_st     | 5.019146          | 0.1272031                   | FALSE                         | 4.725874          | 0.1372646                   | FALSE                         | 4.87251     |
| hsa-miR-1297_st     | 3.831675          | 0.7965046                   | FALSE                         | 3.935736          | 0.764167                    | FALSE                         | 3.8837055   |



| ProbeSet Name         | Hey cell Signal_1 | p-value (Hey cell Signal_1) | Detection (Hey cell Signal_1) | Hey cell Signal_2 | p-value (Hey cell Signal_2) | Detection (Hey cell Signal_2) | Mean signal |
|-----------------------|-------------------|-----------------------------|-------------------------------|-------------------|-----------------------------|-------------------------------|-------------|
| hsa-miR-1298_st       | 4.136746          | 0.5132353                   | FALSE                         | 4.205998          | 0.3481751                   | FALSE                         | 4.171372    |
| hsa-miR-1299_st       | 3.881611          | 0.8107135                   | FALSE                         | 3.923866          | 0.7569234                   | FALSE                         | 3.9027385   |
| hsa-miR-129-star_st   | 4.233841          | 0.3371578                   | FALSE                         | 4.34889           | 0.4213686                   | FALSE                         | 4.2913655   |
| hsa-miR-1300_st       | 4.329413          | 0.2312918                   | FALSE                         | 4.026256          | 0.5673299                   | FALSE                         | 4.1778345   |
| hsa-miR-1301_st       | 5.712546          | 0.02439521                  | TRUE                          | 6.219471          | 0.01509884                  | TRUE                          | 5.9660085   |
| hsa-miR-1302_st       | 4.162684          | 0.3589496                   | FALSE                         | 3.980667          | 0.3230999                   | FALSE                         | 4.0716755   |
| hsa-miR-1303_st       | 4.28048           | 0.243544                    | FALSE                         | 4.742559          | 0.04016499                  | TRUE                          | 4.5115195   |
| hsa-miR-1304_st       | 4.668435          | 0.02704736                  | TRUE                          | 4.439771          | 0.07612841                  | FALSE                         | 4.554103    |
| hsa-miR-1305_st       | 4.063806          | 0.2805449                   | FALSE                         | 4.045281          | 0.287529                    | FALSE                         | 4.0545435   |
| hsa-miR-1306_st       | 4.367698          | 0.1872749                   | FALSE                         | 4.075241          | 0.5732486                   | FALSE                         | 4.2214695   |
| hsa-miR-1307_st       | 8.24764           | 0.004187266                 | TRUE                          | 8.392941          | 0.002449422                 | TRUE                          | 8.3202905   |
| hsa-miR-1308_st       | 11.86021          | 2.05E-08                    | TRUE                          | 11.9251           | 2.05E-08                    | TRUE                          | 11.892655   |
| hsa-miR-130a_st       | 11.7821           | 2.05E-08                    | TRUE                          | 11.96835          | 2.05E-08                    | TRUE                          | 11.875225   |
| hsa-miR-130a-star_st  | 3.883188          | 0.8166621                   | FALSE                         | 3.886419          | 0.8338863                   | FALSE                         | 3.8848035   |
| hsa-miR-130b_st       | 10.74775          | 2.05E-08                    | TRUE                          | 11.059            | 2.05E-08                    | TRUE                          | 10.903375   |
| hsa-miR-130b-star_st  | 4.628899          | 0.04625674                  | TRUE                          | 4.313211          | 0.220986                    | FALSE                         | 4.471055    |
| hsa-miR-132_st        | 6.168651          | 4.57E-05                    | TRUE                          | 6.495519          | 2.59E-05                    | TRUE                          | 6.332085    |
| hsa-miR-1321_st       | 4.028269          | 0.6165079                   | FALSE                         | 3.939694          | 0.8117104                   | FALSE                         | 3.9839815   |
| hsa-miR-1322_st       | 4.237696          | 0.3514095                   | FALSE                         | 3.641637          | 0.9977611                   | FALSE                         | 3.9396665   |
| hsa-miR-1323_st       | 3.859403          | 0.4729383                   | FALSE                         | 4.357524          | 0.1369562                   | FALSE                         | 4.1084635   |
| hsa-miR-1324_st       | 4.065589          | 0.1786031                   | FALSE                         | 4.027172          | 0.3394723                   | FALSE                         | 4.0463805   |
| hsa-miR-132-star_st   | 4.116494          | 0.5930519                   | FALSE                         | 4.136693          | 0.6401972                   | FALSE                         | 4.1265935   |
| hsa-miR-133a_st       | 4.386775          | 0.2658106                   | FALSE                         | 4.614928          | 0.1626665                   | FALSE                         | 4.5008515   |
| hsa-miR-133b_st       | 4.024795          | 0.4308959                   | FALSE                         | 4.411987          | 0.2520852                   | FALSE                         | 4.218391    |
| hsa-miR-134_st        | 3.957549          | 0.4428719                   | FALSE                         | 3.957137          | 0.5125054                   | FALSE                         | 3.957343    |
| hsa-miR-135a_st       | 4.238505          | 0.232075                    | FALSE                         | 4.012304          | 0.7044257                   | FALSE                         | 4.1254045   |
| hsa-miR-135a-star_st  | 4.886287          | 0.04648359                  | TRUE                          | 4.856808          | 0.06387976                  | FALSE                         | 4.8715475   |
| hsa-miR-135b_st       | 4.111466          | 0.4410193                   | FALSE                         | 3.932126          | 0.6921414                   | FALSE                         | 4.021796    |
| hsa-miR-135b-star_st  | 4.675759          | 0.1148762                   | FALSE                         | 4.636218          | 0.09742299                  | FALSE                         | 4.6559885   |
| hsa-miR-136_st        | 3.612421          | 0.9982606                   | FALSE                         | 3.784857          | 0.939743                    | FALSE                         | 3.698639    |
| hsa-miR-136-star_st   | 3.832556          | 0.8913156                   | FALSE                         | 4.00728           | 0.7062799                   | FALSE                         | 3.919918    |
| hsa-miR-137_st        | 5.571562          | 0.000373441                 | TRUE                          | 4.030271          | 0.2914439                   | FALSE                         | 4.8009165   |
| hsa-miR-138_st        | 10.67512          | 1.33E-07                    | TRUE                          | 11.01498          | 2.05E-08                    | TRUE                          | 10.84505    |
| hsa-miR-138-1-star_st | 6.660732          | 0.001204631                 | TRUE                          | 7.038321          | 0.000517718                 | TRUE                          | 6.8495265   |
| hsa-miR-138-2-star_st | 3.846452          | 0.7590488                   | FALSE                         | 4.180392          | 0.452588                    | FALSE                         | 4.013422    |
| hsa-miR-139-3p_st     | 5.209308          | 0.09832136                  | FALSE                         | 5.80447           | 0.03314766                  | TRUE                          | 5.506889    |
| hsa-miR-139-5p_st     | 8.974593          | 5.13E-06                    | TRUE                          | 9.158172          | 1.04E-06                    | TRUE                          | 9.0663825   |
| hsa-miR-140-3p_st     | 9.343713          | 8.45E-07                    | TRUE                          | 10.09007          | 2.47E-07                    | TRUE                          | 9.7168915   |
| hsa-miR-140-5p_st     | 6.938517          | 1.04E-06                    | TRUE                          | 7.349401          | 5.08E-07                    | TRUE                          | 7.143959    |
| hsa-miR-141_st        | 4.003829          | 0.4148116                   | FALSE                         | 3.984135          | 0.3906237                   | FALSE                         | 3.993982    |

| ProbeSet Name        | Hey cell Signal_1 | p-value (Hey cell Signal_1) | Detection (Hey cell Signal_1) | Hey cell Signal_2 | p-value (Hey cell Signal_2) | Detection (Hey cell Signal_2) | Mean signal |
|----------------------|-------------------|-----------------------------|-------------------------------|-------------------|-----------------------------|-------------------------------|-------------|
| hsa-miR-141-star_st  | 3.808734          | 0.7769587                   | FALSE                         | 3.730524          | 0.8788894                   | FALSE                         | 3.769629    |
| hsa-miR-142-3p_st    | 3.907839          | 0.7018078                   | FALSE                         | 4.135271          | 0.2685286                   | FALSE                         | 4.021555    |
| hsa-miR-142-5p_st    | 4.393313          | 0.1914127                   | FALSE                         | 3.983637          | 0.6089602                   | FALSE                         | 4.188475    |
| hsa-miR-143_st       | 3.825619          | 0.7682737                   | FALSE                         | 4.17311           | 0.196147                    | FALSE                         | 3.9993645   |
| hsa-miR-143-star_st  | 3.622722          | 0.9884471                   | FALSE                         | 3.830069          | 0.9256036                   | FALSE                         | 3.7263955   |
| hsa-miR-144_st       | 3.88987           | 0.8257416                   | FALSE                         | 3.658429          | 0.9603883                   | FALSE                         | 3.7741495   |
| hsa-miR-144-star_st  | 4.54898           | 0.08510514                  | FALSE                         | 4.443688          | 0.08155821                  | FALSE                         | 4.496334    |
| hsa-miR-145_st       | 4.076632          | 0.4837695                   | FALSE                         | 3.935344          | 0.7428999                   | FALSE                         | 4.005988    |
| hsa-miR-145-star_st  | 3.69331           | 0.9370632                   | FALSE                         | 4.09185           | 0.6232684                   | FALSE                         | 3.89258     |
| hsa-miR-146a_st      | 9.892371          | 2.05E-08                    | TRUE                          | 9.458002          | 2.05E-08                    | TRUE                          | 9.6751865   |
| hsa-miR-146a-star_st | 3.932826          | 0.8403023                   | FALSE                         | 3.959673          | 0.8064723                   | FALSE                         | 3.9462495   |
| hsa-miR-146b-3p_st   | 3.940066          | 0.7385262                   | FALSE                         | 3.879378          | 0.8243953                   | FALSE                         | 3.909722    |
| hsa-miR-146b-5p_st   | 5.638412          | 0.000719438                 | TRUE                          | 5.122806          | 0.007771982                 | TRUE                          | 5.380609    |
| hsa-miR-147_st       | 3.934614          | 0.8527917                   | FALSE                         | 3.703895          | 0.9860308                   | FALSE                         | 3.8192545   |
| hsa-miR-147b_st      | 3.720689          | 0.9383315                   | FALSE                         | 3.769934          | 0.8248218                   | FALSE                         | 3.7453115   |
| hsa-miR-148a_st      | 4.297123          | 0.2404453                   | FALSE                         | 3.859208          | 0.9247932                   | FALSE                         | 4.0781655   |
| hsa-miR-148a-star_st | 3.837608          | 0.7505646                   | FALSE                         | 3.71436           | 0.976975                    | FALSE                         | 3.775984    |
| hsa-miR-148b_st      | 7.33912           | 7.15E-08                    | TRUE                          | 6.989817          | 1.34E-06                    | TRUE                          | 7.1644685   |
| hsa-miR-148b-star_st | 3.812966          | 0.773815                    | FALSE                         | 4.057539          | 0.6188592                   | FALSE                         | 3.9352525   |
| hsa-miR-149_st       | 6.406921          | 0.01035959                  | TRUE                          | 7.064232          | 0.004742904                 | TRUE                          | 6.7355765   |
| hsa-miR-149-star_st  | 10.55822          | 5.12E-05                    | TRUE                          | 10.84167          | 4.17E-05                    | TRUE                          | 10.699945   |
| hsa-miR-150_st       | 4.429358          | 0.1136374                   | FALSE                         | 4.311132          | 0.2150544                   | FALSE                         | 4.370245    |
| hsa-miR-150-star_st  | 5.34482           | 0.08877129                  | FALSE                         | 5.310308          | 0.0837204                   | FALSE                         | 5.327564    |
| hsa-miR-151-3p_st    | 11.4873           | 2.05E-08                    | TRUE                          | 11.4092           | 2.05E-08                    | TRUE                          | 11.44825    |
| hsa-miR-151-5p_st    | 12.35631          | 2.05E-08                    | TRUE                          | 12.10842          | 2.05E-08                    | TRUE                          | 12.232365   |
| hsa-miR-152_st       | 8.966776          | 2.05E-08                    | TRUE                          | 8.507835          | 2.05E-08                    | TRUE                          | 8.7373055   |
| hsa-miR-153_st       | 3.635304          | 0.9398467                   | FALSE                         | 3.896847          | 0.702127                    | FALSE                         | 3.7660755   |
| hsa-miR-154_st       | 4.247752          | 0.5967494                   | FALSE                         | 3.56561           | 0.7485933                   | FALSE                         | 3.906681    |
| hsa-miR-154-star_st  | 3.782104          | 0.9188092                   | FALSE                         | 4.107383          | 0.60171                     | FALSE                         | 3.9447435   |
| hsa-miR-155_st       | 12.00718          | 2.05E-08                    | TRUE                          | 11.93585          | 2.05E-08                    | TRUE                          | 11.971515   |
| hsa-miR-155-star_st  | 3.837274          | 0.8730041                   | FALSE                         | 3.903417          | 0.7872415                   | FALSE                         | 3.8703455   |
| hsa-miR-15a_st       | 11.68857          | 2.05E-08                    | TRUE                          | 11.72018          | 2.05E-08                    | TRUE                          | 11.704375   |
| hsa-miR-15a-star_st  | 4.633328          | 0.08129809                  | FALSE                         | 4.642715          | 0.08421403                  | FALSE                         | 4.6380215   |
| hsa-miR-15b_st       | 12.02743          | 2.05E-08                    | TRUE                          | 11.88489          | 2.05E-08                    | TRUE                          | 11.95616    |
| hsa-miR-15b-star_st  | 3.829473          | 0.8586974                   | FALSE                         | 3.461467          | 0.9998754                   | FALSE                         | 3.64547     |
| hsa-miR-16_st        | 13.78419          | 2.05E-08                    | TRUE                          | 13.836            | 2.05E-08                    | TRUE                          | 13.810095   |
| hsa-miR-16-1-star_st | 4.807825          | 0.0374077                   | TRUE                          | 4.179473          | 0.3196035                   | FALSE                         | 4.493649    |
| hsa-miR-16-2-star_st | 3.854957          | 0.6870728                   | FALSE                         | 4.273192          | 0.3399662                   | FALSE                         | 4.0640745   |
| hsa-miR-17_st        | 14.04648          | 2.05E-08                    | TRUE                          | 14.18098          | 2.05E-08                    | TRUE                          | 14.11373    |
| hsa-miR-17-star_st   | 9.162098          | 2.05E-08                    | TRUE                          | 9.693462          | 2.05E-08                    | TRUE                          | 9.42778     |

| ProbeSet Name          | Hey cell Signal_1 | p-value (Hey cell Signal_1) | Detection (Hey cell Signal_1) | Hey cell Signal_2 | p-value (Hey cell Signal_2) | Detection (Hey cell Signal_2) | Mean signal |
|------------------------|-------------------|-----------------------------|-------------------------------|-------------------|-----------------------------|-------------------------------|-------------|
| hsa-miR-181a_st        | 11.64863          | 2.05E-08                    | TRUE                          | 11.87433          | 2.05E-08                    | TRUE                          | 11.76148    |
| hsa-miR-181a-2-star_st | 7.614795          | 1.17E-05                    | TRUE                          | 7.969118          | 1.17E-05                    | TRUE                          | 7.7919565   |
| hsa-miR-181a-star_st   | 6.343099          | 8.41E-06                    | TRUE                          | 6.926866          | 1.91E-07                    | TRUE                          | 6.6349825   |
| hsa-miR-181b_st        | 11.42958          | 2.05E-08                    | TRUE                          | 11.51119          | 2.05E-08                    | TRUE                          | 11.470385   |
| hsa-miR-181c_st        | 7.789087          | 5.52E-08                    | TRUE                          | 8.261718          | 3.83E-08                    | TRUE                          | 8.0254025   |
| hsa-miR-181c-star_st   | 4.261766          | 0.2876629                   | FALSE                         | 4.115753          | 0.4578565                   | FALSE                         | 4.1887595   |
| hsa-miR-181d_st        | 7.993557          | 2.05E-08                    | TRUE                          | 7.951527          | 7.15E-08                    | TRUE                          | 7.972542    |
| hsa-miR-182_st         | 10.10565          | 2.05E-08                    | TRUE                          | 10.46882          | 2.05E-08                    | TRUE                          | 10.287235   |
| hsa-miR-1825_st        | 5.602044          | 0.008993738                 | TRUE                          | 5.37183           | 0.009795989                 | TRUE                          | 5.486937    |
| hsa-miR-1826_st        | 13.12944          | 2.05E-08                    | TRUE                          | 13.12166          | 2.05E-08                    | TRUE                          | 13.12555    |
| hsa-miR-1827_st        | 4.144358          | 0.2463959                   | FALSE                         | 4.36795           | 0.3429435                   | FALSE                         | 4.256154    |
| hsa-miR-182-star_st    | 3.735371          | 0.6166992                   | FALSE                         | 3.964725          | 0.3703997                   | FALSE                         | 3.850048    |
| hsa-miR-183_st         | 7.461993          | 3.83E-08                    | TRUE                          | 7.752619          | 1.04E-06                    | TRUE                          | 7.607306    |
| hsa-miR-183-star_st    | 6.070929          | 0.000107682                 | TRUE                          | 5.819757          | 0.000439962                 | TRUE                          | 5.945343    |
| hsa-miR-184_st         | 3.516989          | 0.8782895                   | FALSE                         | 4.279265          | 0.3294367                   | FALSE                         | 3.898127    |
| hsa-miR-185_st         | 9.886943          | 2.05E-08                    | TRUE                          | 10.30511          | 2.05E-08                    | TRUE                          | 10.0960265  |
| hsa-miR-185-star_st    | 3.37854           | 0.9955702                   | FALSE                         | 3.904876          | 0.7832204                   | FALSE                         | 3.641708    |
| hsa-miR-186_st         | 4.761401          | 0.0444038                   | TRUE                          | 4.407786          | 0.1789268                   | FALSE                         | 4.5845935   |
| hsa-miR-186-star_st    | 4.26176           | 0.302312                    | FALSE                         | 4.359915          | 0.2713635                   | FALSE                         | 4.3108375   |
| hsa-miR-187_st         | 3.683671          | 0.910246                    | FALSE                         | 3.703895          | 0.8838601                   | FALSE                         | 3.693783    |
| hsa-miR-187-star_st    | 4.620574          | 0.3063985                   | FALSE                         | 4.31843           | 0.4171086                   | FALSE                         | 4.469502    |
| hsa-miR-188-3p_st      | 4.3715            | 0.220156                    | FALSE                         | 4.703772          | 0.08069304                  | FALSE                         | 4.537636    |
| hsa-miR-188-5p_st      | 5.131291          | 0.03737931                  | TRUE                          | 5.134079          | 0.03587193                  | TRUE                          | 5.132685    |
| hsa-miR-18a_st         | 12.52347          | 2.05E-08                    | TRUE                          | 12.6166           | 2.05E-08                    | TRUE                          | 12.570035   |
| hsa-miR-18a-star_st    | 8.318987          | 6.76E-05                    | TRUE                          | 8.341663          | 5.66E-05                    | TRUE                          | 8.330325    |
| hsa-miR-18b_st         | 11.0414           | 2.05E-08                    | TRUE                          | 10.77644          | 2.05E-08                    | TRUE                          | 10.90892    |
| hsa-miR-18b-star_st    | 3.977759          | 0.4098765                   | FALSE                         | 4.361583          | 0.2232393                   | FALSE                         | 4.169671    |
| hsa-miR-190_st         | 3.718907          | 0.9645385                   | FALSE                         | 3.805469          | 0.8844213                   | FALSE                         | 3.762188    |
| hsa-miR-190b_st        | 3.798754          | 0.4627526                   | FALSE                         | 3.96308           | 0.4553025                   | FALSE                         | 3.880917    |
| hsa-miR-191_st         | 11.93913          | 2.05E-08                    | TRUE                          | 11.99267          | 2.05E-08                    | TRUE                          | 11.9659     |
| hsa-miR-191-star_st    | 4.755446          | 0.1059457                   | FALSE                         | 4.946556          | 0.0809902                   | FALSE                         | 4.851001    |
| hsa-miR-192_st         | 6.655739          | 2.22E-06                    | TRUE                          | 6.484567          | 5.23E-05                    | TRUE                          | 6.570153    |
| hsa-miR-192-star_st    | 3.822355          | 0.6360226                   | FALSE                         | 3.944767          | 0.364886                    | FALSE                         | 3.883561    |
| hsa-miR-193a-3p_st     | 6.702578          | 1.33E-07                    | TRUE                          | 7.525941          | 2.05E-08                    | TRUE                          | 7.1142595   |
| hsa-miR-193a-5p_st     | 9.888112          | 3.48E-06                    | TRUE                          | 10.11076          | 1.73E-06                    | TRUE                          | 9.999436    |
| hsa-miR-193b_st        | 9.320252          | 6.24E-06                    | TRUE                          | 9.578338          | 6.24E-06                    | TRUE                          | 9.449295    |
| hsa-miR-193b-star_st   | 7.84963           | 0.000111208                 | TRUE                          | 7.626097          | 9.16E-05                    | TRUE                          | 7.7378635   |
| hsa-miR-194_st         | 7.096095          | 1.04E-06                    | TRUE                          | 7.355047          | 7.27E-07                    | TRUE                          | 7.225571    |
| hsa-miR-194-star_st    | 3.610557          | 0.98553                     | FALSE                         | 4.298053          | 0.4939365                   | FALSE                         | 3.954305    |
| hsa-miR-195_st         | 8.064267          | 2.05E-08                    | TRUE                          | 8.114392          | 7.27E-07                    | TRUE                          | 8.0893295   |

| ProbeSet Name         | Hey cell Signal_1 | p-value (Hey cell Signal_1) | Detection (Hey cell Signal_1) | Hey cell Signal_2 | p-value (Hey cell Signal_2) | Detection (Hey cell Signal_2) | Mean signal |
|-----------------------|-------------------|-----------------------------|-------------------------------|-------------------|-----------------------------|-------------------------------|-------------|
| hsa-miR-195-star_st   | 4.152751          | 0.2710456                   | FALSE                         | 4.112276          | 0.3865848                   | FALSE                         | 4.1325135   |
| hsa-miR-196a_st       | 7.311774          | 7.15E-08                    | TRUE                          | 7.048921          | 1.91E-06                    | TRUE                          | 7.1803475   |
| hsa-miR-196a-star_st  | 4.329838          | 0.123447                    | FALSE                         | 3.783658          | 0.5846748                   | FALSE                         | 4.056748    |
| hsa-miR-196b_st       | 7.38699           | 7.15E-08                    | TRUE                          | 7.189413          | 9.37E-07                    | TRUE                          | 7.2882015   |
| hsa-miR-197_st        | 6.189903          | 0.002782203                 | TRUE                          | 5.913174          | 0.004075397                 | TRUE                          | 6.0515385   |
| hsa-miR-198_st        | 5.255562          | 0.023335                    | TRUE                          | 5.328732          | 0.02873867                  | TRUE                          | 5.292147    |
| hsa-miR-199a-3p_st    | 10.02901          | 2.05E-08                    | TRUE                          | 9.804936          | 2.05E-08                    | TRUE                          | 9.916973    |
| hsa-miR-199a-5p_st    | 8.519522          | 1.17E-05                    | TRUE                          | 8.778739          | 6.02E-06                    | TRUE                          | 8.6491305   |
| hsa-miR-199b-3p_st    | 9.967819          | 2.05E-08                    | TRUE                          | 9.91703           | 2.05E-08                    | TRUE                          | 9.9424245   |
| hsa-miR-199b-5p_st    | 4.20818           | 0.4246216                   | FALSE                         | 4.234586          | 0.3808025                   | FALSE                         | 4.221383    |
| hsa-miR-19a_st        | 10.58794          | 2.05E-08                    | TRUE                          | 10.53714          | 2.05E-08                    | TRUE                          | 10.56254    |
| hsa-miR-19a-star_st   | 3.90777           | 0.8128526                   | FALSE                         | 3.692999          | 0.9775242                   | FALSE                         | 3.8003845   |
| hsa-miR-19b_st        | 13.67883          | 2.05E-08                    | TRUE                          | 13.70858          | 2.05E-08                    | TRUE                          | 13.693705   |
| hsa-miR-19b-1-star_st | 6.127168          | 7.66E-05                    | TRUE                          | 6.152342          | 5.83E-05                    | TRUE                          | 6.139755    |
| hsa-miR-19b-2-star_st | 3.602146          | 0.9924034                   | FALSE                         | 3.809522          | 0.9448231                   | FALSE                         | 3.705834    |
| hsa-miR-200a_st       | 3.892243          | 0.6917766                   | FALSE                         | 4.27897           | 0.3633761                   | FALSE                         | 4.0856065   |
| hsa-miR-200a-star_st  | 3.979609          | 0.7061421                   | FALSE                         | 3.683453          | 0.8231331                   | FALSE                         | 3.831531    |
| hsa-miR-200b_st       | 4.778102          | 0.04085614                  | TRUE                          | 4.248898          | 0.3246399                   | FALSE                         | 4.5135      |
| hsa-miR-200b-star_st  | 4.152031          | 0.3682013                   | FALSE                         | 4.145669          | 0.6482013                   | FALSE                         | 4.14885     |
| hsa-miR-200c_st       | 5.60622           | 0.000761583                 | TRUE                          | 5.845002          | 0.000212194                 | TRUE                          | 5.725611    |
| hsa-miR-200c-star_st  | 3.9747            | 0.5477098                   | FALSE                         | 3.85502           | 0.6170706                   | FALSE                         | 3.91486     |
| hsa-miR-202_st        | 3.773212          | 0.8899378                   | FALSE                         | 4.143922          | 0.3134468                   | FALSE                         | 3.958567    |
| hsa-miR-202-star_st   | 3.788894          | 0.7538696                   | FALSE                         | 4.035348          | 0.6482922                   | FALSE                         | 3.912121    |
| hsa-miR-203_st        | 4.383618          | 0.2518529                   | FALSE                         | 4.255846          | 0.4028025                   | FALSE                         | 4.319732    |
| hsa-miR-204_st        | 4.447665          | 0.1435351                   | FALSE                         | 4.652451          | 0.05279343                  | TRUE                          | 4.550058    |
| hsa-miR-205_st        | 3.625818          | 0.902554                    | FALSE                         | 3.880012          | 0.8469521                   | FALSE                         | 3.752915    |
| hsa-miR-206_st        | 3.8864            | 0.6450502                   | FALSE                         | 3.893012          | 0.7120483                   | FALSE                         | 3.889706    |
| hsa-miR-208a_st       | 4.04524           | 0.5765167                   | FALSE                         | 3.99679           | 0.8228611                   | FALSE                         | 4.021015    |
| hsa-miR-208b_st       | 3.724085          | 0.9838014                   | FALSE                         | 4.010234          | 0.6612424                   | FALSE                         | 3.8671595   |
| hsa-miR-20a_st        | 13.76445          | 2.05E-08                    | TRUE                          | 13.69843          | 2.05E-08                    | TRUE                          | 13.73144    |
| hsa-miR-20a-star_st   | 5.484936          | 0.001510538                 | TRUE                          | 4.781619          | 0.02977411                  | TRUE                          | 5.1332775   |
| hsa-miR-20b_st        | 12.84971          | 2.05E-08                    | TRUE                          | 12.66518          | 2.05E-08                    | TRUE                          | 12.757445   |
| hsa-miR-20b-star_st   | 3.903262          | 0.6986997                   | FALSE                         | 3.947862          | 0.467509                    | FALSE                         | 3.925562    |
| hsa-miR-21_st         | 10.38654          | 2.05E-08                    | TRUE                          | 9.90873           | 2.05E-08                    | TRUE                          | 10.147635   |
| hsa-miR-210_st        | 9.050625          | 0.000505588                 | TRUE                          | 8.901565          | 0.000483581                 | TRUE                          | 8.976095    |
| hsa-miR-211_st        | 4.401057          | 0.314892                    | FALSE                         | 4.800705          | 0.04900452                  | TRUE                          | 4.600881    |
| hsa-miR-212_st        | 4.385426          | 0.2949412                   | FALSE                         | 4.754534          | 0.09933865                  | FALSE                         | 4.56998     |
| hsa-miR-214_st        | 4.694             | 0.1521323                   | FALSE                         | 4.74034           | 0.1411407                   | FALSE                         | 4.71717     |
| hsa-miR-214-star_st   | 3.42675           | 0.9992249                   | FALSE                         | 3.377351          | 0.999824                    | FALSE                         | 3.4020505   |
| hsa-miR-215_st        | 3.71732           | 0.9707584                   | FALSE                         | 3.65994           | 0.914957                    | FALSE                         | 3.68863     |

| ProbeSet Name         | Hey cell Signal_1 | p-value (Hey cell Signal_1) | Detection (Hey cell Signal_1) | Hey cell Signal_2 | p-value (Hey cell Signal_2) | Detection (Hey cell Signal_2) | Mean signal |
|-----------------------|-------------------|-----------------------------|-------------------------------|-------------------|-----------------------------|-------------------------------|-------------|
| hsa-miR-216a_st       | 4.19894           | 0.2654704                   | FALSE                         | 3.885463          | 0.6468608                   | FALSE                         | 4.0422015   |
| hsa-miR-216b_st       | 3.965611          | 0.5901774                   | FALSE                         | 4.091359          | 0.4088387                   | FALSE                         | 4.028485    |
| hsa-miR-217_st        | 3.708187          | 0.8714949                   | FALSE                         | 4.224815          | 0.3957103                   | FALSE                         | 3.966501    |
| hsa-miR-218_st        | 3.833514          | 0.8169317                   | FALSE                         | 3.766152          | 0.8827029                   | FALSE                         | 3.799833    |
| hsa-miR-218-1-star_st | 3.948865          | 0.4059502                   | FALSE                         | 3.824119          | 0.6691757                   | FALSE                         | 3.886492    |
| hsa-miR-218-2-star_st | 4.102464          | 0.5298406                   | FALSE                         | 4.266135          | 0.4531239                   | FALSE                         | 4.1842995   |
| hsa-miR-219-1-3p_st   | 4.027505          | 0.3132527                   | FALSE                         | 4.114937          | 0.334783                    | FALSE                         | 4.071221    |
| hsa-miR-219-2-3p_st   | 3.828039          | 0.7034477                   | FALSE                         | 3.979695          | 0.4568513                   | FALSE                         | 3.903867    |
| hsa-miR-219-5p_st     | 3.760351          | 0.9290358                   | FALSE                         | 3.940122          | 0.6937125                   | FALSE                         | 3.8502365   |
| hsa-miR-21-star_st    | 7.379362          | 2.70E-05                    | TRUE                          | 7.759491          | 1.17E-05                    | TRUE                          | 7.5694265   |
| hsa-miR-22_st         | 12.28333          | 2.05E-08                    | TRUE                          | 12.48744          | 2.05E-08                    | TRUE                          | 12.385385   |
| hsa-miR-220a_st       | 4.236133          | 0.3309993                   | FALSE                         | 4.272793          | 0.4170989                   | FALSE                         | 4.254463    |
| hsa-miR-220b_st       | 3.90156           | 0.7875335                   | FALSE                         | 4.447812          | 0.2385241                   | FALSE                         | 4.174686    |
| hsa-miR-220c_st       | 3.780792          | 0.6275673                   | FALSE                         | 3.60019           | 0.6633664                   | FALSE                         | 3.690491    |
| hsa-miR-221_st        | 13.71301          | 2.05E-08                    | TRUE                          | 13.67924          | 2.05E-08                    | TRUE                          | 13.696125   |
| hsa-miR-221-star_st   | 7.380317          | 3.83E-08                    | TRUE                          | 6.736021          | 3.54E-07                    | TRUE                          | 7.058169    |
| hsa-miR-222_st        | 13.18137          | 2.05E-08                    | TRUE                          | 13.05637          | 2.05E-08                    | TRUE                          | 13.11887    |
| hsa-miR-222-star_st   | 7.964883          | 2.05E-08                    | TRUE                          | 7.986437          | 2.05E-08                    | TRUE                          | 7.97566     |
| hsa-miR-223_st        | 4.44523           | 0.05799889                  | TRUE                          | 4.823123          | 0.01589037                  | TRUE                          | 4.6341765   |
| hsa-miR-223-star_st   | 3.774049          | 0.9011675                   | FALSE                         | 4.0359            | 0.8280412                   | FALSE                         | 3.9049745   |
| hsa-miR-224_st        | 6.790905          | 3.00E-06                    | TRUE                          | 6.490772          | 6.71E-05                    | TRUE                          | 6.6408385   |
| hsa-miR-22-star_st    | 6.700493          | 1.73E-06                    | TRUE                          | 5.886416          | 0.000258554                 | TRUE                          | 6.2934545   |
| hsa-miR-23a_st        | 14.07356          | 2.05E-08                    | TRUE                          | 13.96663          | 2.05E-08                    | TRUE                          | 14.020095   |
| hsa-miR-23a-star_st   | 7.825211          | 9.28E-05                    | TRUE                          | 8.133495          | 6.76E-05                    | TRUE                          | 7.979353    |
| hsa-miR-23b_st        | 12.95084          | 2.05E-08                    | TRUE                          | 12.83041          | 2.05E-08                    | TRUE                          | 12.890625   |
| hsa-miR-23b-star_st   | 4.44324           | 0.2017044                   | FALSE                         | 4.495137          | 0.1209215                   | FALSE                         | 4.4691885   |
| hsa-miR-24_st         | 13.6108           | 2.05E-08                    | TRUE                          | 13.71277          | 2.05E-08                    | TRUE                          | 13.661785   |
| hsa-miR-24-1-star_st  | 3.988124          | 0.6866776                   | FALSE                         | 3.897335          | 0.9116896                   | FALSE                         | 3.9427295   |
| hsa-miR-24-2-star_st  | 8.030046          | 2.05E-08                    | TRUE                          | 8.27725           | 2.05E-08                    | TRUE                          | 8.153648    |
| hsa-miR-25_st         | 10.90728          | 2.05E-08                    | TRUE                          | 10.7226           | 2.05E-08                    | TRUE                          | 10.81494    |
| hsa-miR-25-star_st    | 5.555406          | 0.004851778                 | TRUE                          | 5.671277          | 0.005390134                 | TRUE                          | 5.6133415   |
| hsa-miR-26a_st        | 12.84485          | 2.05E-08                    | TRUE                          | 12.82214          | 2.05E-08                    | TRUE                          | 12.833495   |
| hsa-miR-26a-1-star_st | 3.673287          | 0.6914546                   | FALSE                         | 3.698351          | 0.8713537                   | FALSE                         | 3.685819    |
| hsa-miR-26a-2-star_st | 4.114666          | 0.3959299                   | FALSE                         | 4.380797          | 0.1877646                   | FALSE                         | 4.2477315   |
| hsa-miR-26b_st        | 5.266018          | 0.001120008                 | TRUE                          | 4.87576           | 0.03177686                  | TRUE                          | 5.070889    |
| hsa-miR-26b-star_st   | 4.780072          | 0.03445593                  | TRUE                          | 4.135298          | 0.3155666                   | FALSE                         | 4.457685    |
| hsa-miR-27a_st        | 12.57553          | 2.05E-08                    | TRUE                          | 12.84544          | 2.05E-08                    | TRUE                          | 12.710485   |
| hsa-miR-27a-star_st   | 9.504432          | 3.54E-07                    | TRUE                          | 9.900805          | 2.47E-07                    | TRUE                          | 9.7026185   |
| hsa-miR-27b_st        | 9.86807           | 2.05E-08                    | TRUE                          | 9.877617          | 2.05E-08                    | TRUE                          | 9.8728435   |
| hsa-miR-27b-star_st   | 5.928037          | 0.000188057                 | TRUE                          | 6.437035          | 4.23E-05                    | TRUE                          | 6.182536    |

| ProbeSet Name         | Hey cell Signal_1 | p-value (Hey cell Signal_1) | Detection (Hey cell Signal_1) | Hey cell Signal_2 | p-value (Hey cell Signal_2) | Detection (Hey cell Signal_2) | Mean signal |
|-----------------------|-------------------|-----------------------------|-------------------------------|-------------------|-----------------------------|-------------------------------|-------------|
| hsa-miR-28-3p_st      | 9.852942          | 2.05E-08                    | TRUE                          | 9.774219          | 2.05E-08                    | TRUE                          | 9.8135805   |
| hsa-miR-28-5p_st      | 10.45352          | 2.05E-08                    | TRUE                          | 10.56691          | 2.05E-08                    | TRUE                          | 10.510215   |
| hsa-miR-296-3p_st     | 4.461213          | 0.2459542                   | FALSE                         | 4.545229          | 0.2678587                   | FALSE                         | 4.503221    |
| hsa-miR-296-5p_st     | 4.325723          | 0.3820266                   | FALSE                         | 4.323389          | 0.4168358                   | FALSE                         | 4.324556    |
| hsa-miR-297_st        | 3.802657          | 0.8329407                   | FALSE                         | 3.67532           | 0.9847863                   | FALSE                         | 3.7389885   |
| hsa-miR-298_st        | 3.874487          | 0.6551499                   | FALSE                         | 3.969567          | 0.554555                    | FALSE                         | 3.922027    |
| hsa-miR-299-3p_st     | 4.316647          | 0.1972369                   | FALSE                         | 4.311314          | 0.18752                     | FALSE                         | 4.3139805   |
| hsa-miR-299-5p_st     | 3.931579          | 0.7460359                   | FALSE                         | 3.878307          | 0.7115523                   | FALSE                         | 3.904943    |
| hsa-miR-29a_st        | 13.51647          | 2.05E-08                    | TRUE                          | 13.36726          | 2.05E-08                    | TRUE                          | 13.441865   |
| hsa-miR-29a-star_st   | 3.861657          | 0.856346                    | FALSE                         | 3.990462          | 0.6769534                   | FALSE                         | 3.9260595   |
| hsa-miR-29b_st        | 9.970066          | 2.05E-08                    | TRUE                          | 10.23165          | 2.05E-08                    | TRUE                          | 10.100858   |
| hsa-miR-29b-1-star_st | 9.061357          | 2.05E-08                    | TRUE                          | 8.908263          | 2.05E-08                    | TRUE                          | 8.98481     |
| hsa-miR-29b-2-star_st | 5.195711          | 0.01490681                  | TRUE                          | 5.076156          | 0.02617954                  | TRUE                          | 5.1359335   |
| hsa-miR-29c_st        | 7.039926          | 1.03E-07                    | TRUE                          | 6.96658           | 2.47E-07                    | TRUE                          | 7.003253    |
| hsa-miR-29c-star_st   | 4.490908          | 0.1306837                   | FALSE                         | 4.53687           | 0.07920701                  | FALSE                         | 4.513889    |
| hsa-miR-300_st        | 4.100615          | 0.5279948                   | FALSE                         | 3.782823          | 0.8264092                   | FALSE                         | 3.941719    |
| hsa-miR-301a_st       | 8.999187          | 2.05E-08                    | TRUE                          | 8.911174          | 2.05E-08                    | TRUE                          | 8.9551805   |
| hsa-miR-301b_st       | 4.212873          | 0.3144                      | FALSE                         | 4.660367          | 0.0375449                   | TRUE                          | 4.43662     |
| hsa-miR-302a_st       | 3.679544          | 0.8921469                   | FALSE                         | 4.04428           | 0.6179889                   | FALSE                         | 3.861912    |
| hsa-miR-302a-star_st  | 4.014927          | 0.5781744                   | FALSE                         | 3.87221           | 0.9052343                   | FALSE                         | 3.9435685   |
| hsa-miR-302b_st       | 3.739034          | 0.9173374                   | FALSE                         | 3.703895          | 0.992786                    | FALSE                         | 3.7214645   |
| hsa-miR-302b-star_st  | 3.83602           | 0.1078447                   | FALSE                         | 3.828455          | 0.2269657                   | FALSE                         | 3.8322375   |
| hsa-miR-302c_st       | 3.698062          | 0.7129895                   | FALSE                         | 3.703895          | 0.8887892                   | FALSE                         | 3.7009785   |
| hsa-miR-302c-star_st  | 4.203002          | 0.5034055                   | FALSE                         | 4.181862          | 0.3963328                   | FALSE                         | 4.192432    |
| hsa-miR-302d_st       | 3.927685          | 0.774882                    | FALSE                         | 3.705661          | 0.9570726                   | FALSE                         | 3.816673    |
| hsa-miR-302d-star_st  | 3.880051          | 0.6593373                   | FALSE                         | 4.400568          | 0.1527875                   | FALSE                         | 4.1403095   |
| hsa-miR-302e_st       | 3.756855          | 0.9915972                   | FALSE                         | 4.02828           | 0.5351376                   | FALSE                         | 3.8925675   |
| hsa-miR-302f_st       | 4.010996          | 0.618574                    | FALSE                         | 3.820144          | 0.9146804                   | FALSE                         | 3.91557     |
| hsa-miR-30a_st        | 11.33071          | 2.05E-08                    | TRUE                          | 11.30665          | 2.05E-08                    | TRUE                          | 11.31868    |
| hsa-miR-30a-star_st   | 9.542118          | 2.05E-08                    | TRUE                          | 9.541613          | 2.05E-08                    | TRUE                          | 9.5418655   |
| hsa-miR-30b_st        | 9.958064          | 2.05E-08                    | TRUE                          | 9.720056          | 2.05E-08                    | TRUE                          | 9.83906     |
| hsa-miR-30b-star_st   | 5.986281          | 0.000108452                 | TRUE                          | 6.200021          | 0.000120505                 | TRUE                          | 6.093151    |
| hsa-miR-30c_st        | 11.29447          | 2.05E-08                    | TRUE                          | 11.20706          | 2.05E-08                    | TRUE                          | 11.250765   |
| hsa-miR-30c-1-star_st | 4.769015          | 0.07111707                  | FALSE                         | 5.477239          | 0.01181197                  | TRUE                          | 5.123127    |
| hsa-miR-30c-2-star_st | 7.511297          | 2.05E-08                    | TRUE                          | 7.628953          | 2.05E-08                    | TRUE                          | 7.570125    |
| hsa-miR-30d_st        | 9.684246          | 2.05E-08                    | TRUE                          | 9.660586          | 2.05E-08                    | TRUE                          | 9.672416    |
| hsa-miR-30d-star_st   | 4.177591          | 0.4676147                   | FALSE                         | 3.905482          | 0.8324472                   | FALSE                         | 4.0415365   |
| hsa-miR-30e_st        | 7.222992          | 1.33E-07                    | TRUE                          | 7.132535          | 1.04E-06                    | TRUE                          | 7.1777635   |
| hsa-miR-30e-star_st   | 7.510564          | 3.83E-08                    | TRUE                          | 6.895238          | 4.41E-06                    | TRUE                          | 7.202901    |
| hsa-miR-31_st         | 3.671488          | 0.9383768                   | FALSE                         | 3.727649          | 0.9244084                   | FALSE                         | 3.6995685   |

| ProbeSet Name       | Hey cell Signal_1 | p-value (Hey cell Signal_1) | Detection (Hey cell Signal_1) | Hey cell Signal_2 | p-value (Hey cell Signal_2) | Detection (Hey cell Signal_2) | Mean signal |
|---------------------|-------------------|-----------------------------|-------------------------------|-------------------|-----------------------------|-------------------------------|-------------|
| hsa-miR-31-star_st  | 4.051027          | 0.5751347                   | FALSE                         | 4.054307          | 0.6186572                   | FALSE                         | 4.052667    |
| hsa-miR-32_st       | 4.080504          | 0.4874305                   | FALSE                         | 3.756927          | 0.9136334                   | FALSE                         | 3.9187155   |
| hsa-miR-320a_st     | 11.34273          | 2.05E-08                    | TRUE                          | 11.60002          | 2.05E-08                    | TRUE                          | 11.471375   |
| hsa-miR-320b_st     | 11.29085          | 2.05E-08                    | TRUE                          | 11.60579          | 2.05E-08                    | TRUE                          | 11.44832    |
| hsa-miR-320c_st     | 11.30556          | 2.05E-08                    | TRUE                          | 11.57421          | 2.05E-08                    | TRUE                          | 11.439885   |
| hsa-miR-320d_st     | 10.75707          | 2.05E-08                    | TRUE                          | 10.86508          | 2.05E-08                    | TRUE                          | 10.811075   |
| hsa-miR-323-3p_st   | 4.105589          | 0.6069993                   | FALSE                         | 3.604398          | 0.8767163                   | FALSE                         | 3.8549935   |
| hsa-miR-323-5p_st   | 3.106819          | 0.9078943                   | FALSE                         | 3.850213          | 0.5319916                   | FALSE                         | 3.478516    |
| hsa-miR-324-3p_st   | 7.780801          | 0.001848006                 | TRUE                          | 7.919982          | 0.001638247                 | TRUE                          | 7.8503915   |
| hsa-miR-324-5p_st   | 8.589381          | 0.000655339                 | TRUE                          | 8.986996          | 0.000483581                 | TRUE                          | 8.7881885   |
| hsa-miR-325_st      | 4.257049          | 0.4057356                   | FALSE                         | 3.8376            | 0.5295268                   | FALSE                         | 4.0473245   |
| hsa-miR-326_st      | 3.956652          | 0.3920549                   | FALSE                         | 3.768158          | 0.5419138                   | FALSE                         | 3.862405    |
| hsa-miR-328_st      | 4.159292          | 0.4506812                   | FALSE                         | 4.199529          | 0.5425952                   | FALSE                         | 4.1794105   |
| hsa-miR-329_st      | 3.970313          | 0.3376943                   | FALSE                         | 3.952975          | 0.423375                    | FALSE                         | 3.961644    |
| hsa-miR-32-star_st  | 3.852492          | 0.6292697                   | FALSE                         | 3.881181          | 0.5982715                   | FALSE                         | 3.8668365   |
| hsa-miR-330-3p_st   | 6.374653          | 0.0109384                   | TRUE                          | 6.437079          | 0.01033869                  | TRUE                          | 6.405866    |
| hsa-miR-330-5p_st   | 4.046971          | 0.562011                    | FALSE                         | 3.915195          | 0.6730492                   | FALSE                         | 3.981083    |
| hsa-miR-331-3p_st   | 6.864896          | 0.000650976                 | TRUE                          | 6.55796           | 0.001109542                 | TRUE                          | 6.711428    |
| hsa-miR-331-5p_st   | 5.797997          | 0.008501192                 | TRUE                          | 6.093332          | 0.002565847                 | TRUE                          | 5.9456645   |
| hsa-miR-335_st      | 5.622231          | 0.000453953                 | TRUE                          | 5.695851          | 0.000363929                 | TRUE                          | 5.659041    |
| hsa-miR-335-star_st | 3.955444          | 0.5281475                   | FALSE                         | 4.095158          | 0.4586904                   | FALSE                         | 4.025301    |
| hsa-miR-337-3p_st   | 4.563292          | 0.08630962                  | FALSE                         | 4.411986          | 0.07002068                  | FALSE                         | 4.487639    |
| hsa-miR-337-5p_st   | 4.193087          | 0.2631173                   | FALSE                         | 4.006785          | 0.3240659                   | FALSE                         | 4.099936    |
| hsa-miR-338-3p_st   | 3.921505          | 0.4535367                   | FALSE                         | 4.126955          | 0.3510246                   | FALSE                         | 4.02423     |
| hsa-miR-338-5p_st   | 5.037811          | 0.01803095                  | TRUE                          | 4.937376          | 0.03320538                  | TRUE                          | 4.9875935   |
| hsa-miR-339-3p_st   | 7.227656          | 0.01376169                  | TRUE                          | 7.792341          | 0.007172582                 | TRUE                          | 7.5099985   |
| hsa-miR-339-5p_st   | 7.966775          | 0.001440141                 | TRUE                          | 8.216959          | 0.001143585                 | TRUE                          | 8.091867    |
| hsa-miR-33a_st      | 3.828206          | 0.7967433                   | FALSE                         | 3.948527          | 0.4017134                   | FALSE                         | 3.8883665   |
| hsa-miR-33a-star_st | 4.347897          | 0.1374208                   | FALSE                         | 4.553307          | 0.06342371                  | FALSE                         | 4.450602    |
| hsa-miR-33b_st      | 3.696597          | 0.9617728                   | FALSE                         | 3.752521          | 0.9781448                   | FALSE                         | 3.724559    |
| hsa-miR-33b-star_st | 4.193037          | 0.5355298                   | FALSE                         | 4.340283          | 0.5888814                   | FALSE                         | 4.26666     |
| hsa-miR-340_st      | 3.815474          | 0.7333414                   | FALSE                         | 3.809414          | 0.8355172                   | FALSE                         | 3.812444    |
| hsa-miR-340-star_st | 3.720405          | 0.9753059                   | FALSE                         | 3.857708          | 0.9368957                   | FALSE                         | 3.7890565   |
| hsa-miR-342-3p_st   | 8.489235          | 1.17E-05                    | TRUE                          | 8.752133          | 6.02E-06                    | TRUE                          | 8.620684    |
| hsa-miR-342-5p_st   | 5.240386          | 0.002530064                 | TRUE                          | 5.0764            | 0.009458131                 | TRUE                          | 5.158393    |
| hsa-miR-345_st      | 6.322359          | 0.0116637                   | TRUE                          | 6.679934          | 0.007248365                 | TRUE                          | 6.5011465   |
| hsa-miR-346_st      | 5.44629           | 0.08046463                  | FALSE                         | 5.314171          | 0.06510813                  | FALSE                         | 5.3802305   |
| hsa-miR-34a_st      | 11.48083          | 2.05E-08                    | TRUE                          | 11.63825          | 2.05E-08                    | TRUE                          | 11.55954    |
| hsa-miR-34a-star_st | 8.463707          | 2.05E-08                    | TRUE                          | 8.367687          | 2.05E-08                    | TRUE                          | 8.415697    |
| hsa-miR-34b_st      | 4.116495          | 0.5177085                   | FALSE                         | 4.17711           | 0.4656454                   | FALSE                         | 4.1468025   |

| ProbeSet Name        | Hey cell Signal_1 | p-value (Hey cell Signal_1) | Detection (Hey cell Signal_1) | Hey cell Signal_2 | p-value (Hey cell Signal_2) | Detection (Hey cell Signal_2) | Mean signal |
|----------------------|-------------------|-----------------------------|-------------------------------|-------------------|-----------------------------|-------------------------------|-------------|
| hsa-miR-34b-star_st  | 4.761217          | 0.03343002                  | TRUE                          | 4.795035          | 0.03467235                  | TRUE                          | 4.778126    |
| hsa-miR-34c-3p_st    | 4.359985          | 0.2692571                   | FALSE                         | 4.206358          | 0.4857394                   | FALSE                         | 4.2831715   |
| hsa-miR-34c-5p_st    | 3.861472          | 0.8939115                   | FALSE                         | 4.143691          | 0.3678715                   | FALSE                         | 4.0025815   |
| hsa-miR-361-3p_st    | 4.831573          | 0.09701066                  | FALSE                         | 4.718982          | 0.06317347                  | FALSE                         | 4.7752775   |
| hsa-miR-361-5p_st    | 11.22049          | 2.05E-08                    | TRUE                          | 11.37724          | 2.05E-08                    | TRUE                          | 11.298865   |
| hsa-miR-362-3p_st    | 4.423656          | 0.07232472                  | FALSE                         | 4.373031          | 0.1719543                   | FALSE                         | 4.3983435   |
| hsa-miR-362-5p_st    | 6.969214          | 3.83E-08                    | TRUE                          | 7.234544          | 2.05E-08                    | TRUE                          | 7.101879    |
| hsa-miR-363_st       | 4.085313          | 0.6185949                   | FALSE                         | 4.199151          | 0.3472325                   | FALSE                         | 4.142232    |
| hsa-miR-363-star_st  | 4.027505          | 0.6387644                   | FALSE                         | 4.07861           | 0.5681288                   | FALSE                         | 4.0530575   |
| hsa-miR-365_st       | 4.517023          | 0.2632387                   | FALSE                         | 4.454588          | 0.1540934                   | FALSE                         | 4.4858055   |
| hsa-miR-367_st       | 3.930166          | 0.6098896                   | FALSE                         | 3.888076          | 0.8381546                   | FALSE                         | 3.909121    |
| hsa-miR-367-star_st  | 4.285926          | 0.106075                    | FALSE                         | 4.161735          | 0.3519641                   | FALSE                         | 4.2238305   |
| hsa-miR-369-3p_st    | 4.141056          | 0.5501054                   | FALSE                         | 3.926553          | 0.4622097                   | FALSE                         | 4.0338045   |
| hsa-miR-369-5p_st    | 3.938997          | 0.592765                    | FALSE                         | 3.81468           | 0.6286529                   | FALSE                         | 3.8768385   |
| hsa-miR-370_st       | 3.795783          | 0.712053                    | FALSE                         | 4.011487          | 0.640092                    | FALSE                         | 3.903635    |
| hsa-miR-371-3p_st    | 3.851804          | 0.7739521                   | FALSE                         | 4.21377           | 0.4769424                   | FALSE                         | 4.032787    |
| hsa-miR-371-5p_st    | 4.921411          | 0.04507086                  | TRUE                          | 4.713943          | 0.1093896                   | FALSE                         | 4.817677    |
| hsa-miR-372_st       | 4.183377          | 0.3484201                   | FALSE                         | 4.263911          | 0.2050205                   | FALSE                         | 4.223644    |
| hsa-miR-373_st       | 3.632411          | 0.9853121                   | FALSE                         | 3.762522          | 0.6599941                   | FALSE                         | 3.6974665   |
| hsa-miR-373-star_st  | 5.394078          | 0.008606655                 | TRUE                          | 4.894591          | 0.05489975                  | TRUE                          | 5.1443345   |
| hsa-miR-374a_st      | 4.164869          | 0.2725741                   | FALSE                         | 3.823667          | 0.6592945                   | FALSE                         | 3.994268    |
| hsa-miR-374a-star_st | 4.351226          | 0.116101                    | FALSE                         | 4.151402          | 0.1903195                   | FALSE                         | 4.251314    |
| hsa-miR-374b_st      | 4.44908           | 0.04156358                  | TRUE                          | 4.645103          | 0.04516261                  | TRUE                          | 4.5470915   |
| hsa-miR-374b-star_st | 5.04333           | 0.03489241                  | TRUE                          | 5.717365          | 0.000969084                 | TRUE                          | 5.3803475   |
| hsa-miR-375_st       | 3.542313          | 0.923592                    | FALSE                         | 3.390872          | 0.9703995                   | FALSE                         | 3.4665925   |
| hsa-miR-376a_st      | 3.962384          | 0.1388021                   | FALSE                         | 4.113528          | 0.1867275                   | FALSE                         | 4.037956    |
| hsa-miR-376a-star_st | 3.959147          | 0.6664306                   | FALSE                         | 4.18318           | 0.3072525                   | FALSE                         | 4.0711635   |
| hsa-miR-376b_st      | 4.214849          | 0.3124118                   | FALSE                         | 3.878307          | 0.651742                    | FALSE                         | 4.046578    |
| hsa-miR-376c_st      | 3.804842          | 0.6237683                   | FALSE                         | 4.041564          | 0.6538348                   | FALSE                         | 3.923203    |
| hsa-miR-377_st       | 3.723636          | 0.9296317                   | FALSE                         | 3.932126          | 0.4044331                   | FALSE                         | 3.827881    |
| hsa-miR-377-star_st  | 3.798322          | 0.7798398                   | FALSE                         | 3.990462          | 0.6079559                   | FALSE                         | 3.894392    |
| hsa-miR-378_st       | 10.4987           | 2.05E-08                    | TRUE                          | 10.74733          | 2.05E-08                    | TRUE                          | 10.623015   |
| hsa-miR-378-star_st  | 6.49208           | 0.001065462                 | TRUE                          | 6.910004          | 0.000490943                 | TRUE                          | 6.701042    |
| hsa-miR-379_st       | 4.018666          | 0.5833824                   | FALSE                         | 4.268188          | 0.3837671                   | FALSE                         | 4.143427    |
| hsa-miR-379-star_st  | 3.943397          | 0.7064631                   | FALSE                         | 4.18397           | 0.4526217                   | FALSE                         | 4.0636835   |
| hsa-miR-380_st       | 3.984816          | 0.5737847                   | FALSE                         | 3.959507          | 0.5065987                   | FALSE                         | 3.9721615   |
| hsa-miR-380-star_st  | 3.881351          | 0.7984123                   | FALSE                         | 3.979695          | 0.5335684                   | FALSE                         | 3.930523    |
| hsa-miR-381_st       | 3.853717          | 0.8189476                   | FALSE                         | 3.824782          | 0.7879536                   | FALSE                         | 3.8392495   |
| hsa-miR-382_st       | 3.896189          | 0.8343616                   | FALSE                         | 3.821469          | 0.8696277                   | FALSE                         | 3.858829    |
| hsa-miR-383_st       | 4.017117          | 0.6768663                   | FALSE                         | 3.881532          | 0.9370254                   | FALSE                         | 3.9493245   |



| ProbeSet Name       | Hey cell Signal_1 | p-value (Hey cell Signal_1) | Detection (Hey cell Signal_1) | Hey cell Signal_2 | p-value (Hey cell Signal_2) | Detection (Hey cell Signal_2) | Mean signal |
|---------------------|-------------------|-----------------------------|-------------------------------|-------------------|-----------------------------|-------------------------------|-------------|
| hsa-miR-384_st      | 3.765955          | 0.9239839                   | FALSE                         | 3.81303           | 0.8508592                   | FALSE                         | 3.7894925   |
| hsa-miR-409-3p_st   | 4.205003          | 0.4290074                   | FALSE                         | 4.154153          | 0.5113637                   | FALSE                         | 4.179578    |
| hsa-miR-409-5p_st   | 4.000717          | 0.6870136                   | FALSE                         | 3.881181          | 0.770983                    | FALSE                         | 3.940949    |
| hsa-miR-410_st      | 4.086976          | 0.7037769                   | FALSE                         | 3.93688           | 0.6136336                   | FALSE                         | 4.011928    |
| hsa-miR-411_st      | 3.714956          | 0.9299247                   | FALSE                         | 3.935821          | 0.7166102                   | FALSE                         | 3.8253885   |
| hsa-miR-411-star_st | 3.944336          | 0.3965995                   | FALSE                         | 4.054842          | 0.6017542                   | FALSE                         | 3.999589    |
| hsa-miR-412_st      | 3.920713          | 0.8616076                   | FALSE                         | 4.298779          | 0.4676921                   | FALSE                         | 4.109746    |
| hsa-miR-421_st      | 7.147796          | 7.27E-07                    | TRUE                          | 7.370607          | 5.08E-07                    | TRUE                          | 7.2592015   |
| hsa-miR-422a_st     | 9.95235           | 2.47E-07                    | TRUE                          | 10.02749          | 2.47E-07                    | TRUE                          | 9.98992     |
| hsa-miR-423-3p_st   | 9.468464          | 9.44E-05                    | TRUE                          | 9.672494          | 6.60E-05                    | TRUE                          | 9.570479    |
| hsa-miR-423-5p_st   | 7.74637           | 0.000134007                 | TRUE                          | 8.052301          | 6.76E-05                    | TRUE                          | 7.8993355   |
| hsa-miR-424_st      | 6.798087          | 3.93E-07                    | TRUE                          | 6.574832          | 3.54E-07                    | TRUE                          | 6.6864595   |
| hsa-miR-424-star_st | 10.95021          | 2.05E-08                    | TRUE                          | 11.1037           | 2.05E-08                    | TRUE                          | 11.026955   |
| hsa-miR-425_st      | 10.65754          | 2.05E-08                    | TRUE                          | 10.73504          | 2.05E-08                    | TRUE                          | 10.69629    |
| hsa-miR-425-star_st | 6.480427          | 0.0110382                   | TRUE                          | 6.812973          | 0.006254818                 | TRUE                          | 6.6467      |
| hsa-miR-429_st      | 4.19894           | 0.1705141                   | FALSE                         | 3.899575          | 0.6625661                   | FALSE                         | 4.0492575   |
| hsa-miR-431_st      | 3.781602          | 0.392839                    | FALSE                         | 3.496956          | 0.7042443                   | FALSE                         | 3.639279    |
| hsa-miR-431-star_st | 3.674339          | 0.7108653                   | FALSE                         | 3.781373          | 0.850499                    | FALSE                         | 3.727856    |
| hsa-miR-432_st      | 6.959232          | 6.26E-05                    | TRUE                          | 6.817521          | 0.000131837                 | TRUE                          | 6.8883765   |
| hsa-miR-432-star_st | 3.399358          | 0.9131929                   | FALSE                         | 3.628878          | 0.8756734                   | FALSE                         | 3.514118    |
| hsa-miR-433_st      | 3.651544          | 0.8145517                   | FALSE                         | 4.117547          | 0.480315                    | FALSE                         | 3.8845455   |
| hsa-miR-448_st      | 3.662035          | 0.8506925                   | FALSE                         | 3.592212          | 0.9125836                   | FALSE                         | 3.6271235   |
| hsa-miR-449a_st     | 4.308248          | 0.2395336                   | FALSE                         | 3.943358          | 0.5256907                   | FALSE                         | 4.125803    |
| hsa-miR-449b_st     | 3.923585          | 0.5777347                   | FALSE                         | 4.18909           | 0.3923577                   | FALSE                         | 4.0563375   |
| hsa-miR-450a_st     | 3.926942          | 0.6778746                   | FALSE                         | 3.879213          | 0.9059538                   | FALSE                         | 3.9030775   |
| hsa-miR-450b-3p_st  | 4.055386          | 0.3523176                   | FALSE                         | 3.573226          | 0.8758541                   | FALSE                         | 3.814306    |
| hsa-miR-450b-5p_st  | 3.544382          | 0.7402608                   | FALSE                         | 3.94481           | 0.5028381                   | FALSE                         | 3.744596    |
| hsa-miR-451_st      | 4.41973           | 0.1369254                   | FALSE                         | 3.929036          | 0.6943743                   | FALSE                         | 4.174383    |
| hsa-miR-452_st      | 6.67858           | 1.73E-06                    | TRUE                          | 6.289215          | 2.59E-05                    | TRUE                          | 6.4838975   |
| hsa-miR-452-star_st | 3.711299          | 0.906099                    | FALSE                         | 3.739811          | 0.9659663                   | FALSE                         | 3.725555    |
| hsa-miR-453_st      | 3.841091          | 0.6069345                   | FALSE                         | 4.079556          | 0.413562                    | FALSE                         | 3.9603235   |
| hsa-miR-454_st      | 6.152946          | 7.81E-06                    | TRUE                          | 5.542192          | 0.004369434                 | TRUE                          | 5.847569    |
| hsa-miR-454-star_st | 3.831262          | 0.8369657                   | FALSE                         | 3.98014           | 0.5888253                   | FALSE                         | 3.905701    |
| hsa-miR-455-3p_st   | 11.12649          | 2.05E-08                    | TRUE                          | 11.22028          | 2.05E-08                    | TRUE                          | 11.173385   |
| hsa-miR-455-5p_st   | 7.910523          | 2.05E-08                    | TRUE                          | 7.879559          | 1.33E-07                    | TRUE                          | 7.895041    |
| hsa-miR-483-3p_st   | 4.191784          | 0.2018123                   | FALSE                         | 4.392884          | 0.2416335                   | FALSE                         | 4.292334    |
| hsa-miR-483-5p_st   | 4.6347            | 0.07203483                  | FALSE                         | 4.617806          | 0.1299706                   | FALSE                         | 4.626253    |
| hsa-miR-484_st      | 5.348094          | 0.05443101                  | TRUE                          | 4.841135          | 0.1892893                   | FALSE                         | 5.0946145   |
| hsa-miR-485-3p_st   | 3.943346          | 0.4521222                   | FALSE                         | 4.304315          | 0.1467259                   | FALSE                         | 4.1238305   |
| hsa-miR-485-5p_st   | 3.892829          | 0.7682304                   | FALSE                         | 3.979695          | 0.7429408                   | FALSE                         | 3.936262    |

| ProbeSet Name       | Hey cell Signal_1 | p-value (Hey cell Signal_1) | Detection (Hey cell Signal_1) | Hey cell Signal_2 | p-value (Hey cell Signal_2) | Detection (Hey cell Signal_2) | Mean signal |
|---------------------|-------------------|-----------------------------|-------------------------------|-------------------|-----------------------------|-------------------------------|-------------|
| hsa-miR-486-3p_st   | 4.134856          | 0.5420291                   | FALSE                         | 4.273312          | 0.204537                    | FALSE                         | 4.204084    |
| hsa-miR-486-5p_st   | 5.214447          | 0.0799602                   | FALSE                         | 4.963392          | 0.09753851                  | FALSE                         | 5.0889195   |
| hsa-miR-487a_st     | 4.136078          | 0.4869339                   | FALSE                         | 4.200295          | 0.4315059                   | FALSE                         | 4.1681865   |
| hsa-miR-487b_st     | 3.973408          | 0.6263136                   | FALSE                         | 4.04428           | 0.5939404                   | FALSE                         | 4.008844    |
| hsa-miR-488_st      | 4.191642          | 0.2839728                   | FALSE                         | 3.715142          | 0.9271194                   | FALSE                         | 3.953392    |
| hsa-miR-488-star_st | 3.837274          | 0.952756                    | FALSE                         | 4.373733          | 0.1858008                   | FALSE                         | 4.1055035   |
| hsa-miR-489_st      | 4.068357          | 0.5057915                   | FALSE                         | 4.188136          | 0.5079623                   | FALSE                         | 4.1282465   |
| hsa-miR-490-3p_st   | 3.758442          | 0.8425336                   | FALSE                         | 4.282236          | 0.4570412                   | FALSE                         | 4.020339    |
| hsa-miR-490-5p_st   | 4.341979          | 0.3586989                   | FALSE                         | 4.043633          | 0.5434839                   | FALSE                         | 4.192806    |
| hsa-miR-491-3p_st   | 4.155323          | 0.614058                    | FALSE                         | 4.019274          | 0.774105                    | FALSE                         | 4.0872985   |
| hsa-miR-491-5p_st   | 6.1705            | 0.00250132                  | TRUE                          | 6.425521          | 0.001293509                 | TRUE                          | 6.2980105   |
| hsa-miR-492_st      | 4.282005          | 0.4094029                   | FALSE                         | 4.526297          | 0.242071                    | FALSE                         | 4.404151    |
| hsa-miR-493_st      | 4.48596           | 0.1453358                   | FALSE                         | 4.122112          | 0.4252124                   | FALSE                         | 4.304036    |
| hsa-miR-493-star_st | 4.198169          | 0.3800416                   | FALSE                         | 4.188744          | 0.3072525                   | FALSE                         | 4.1934565   |
| hsa-miR-494_st      | 5.63579           | 0.000599901                 | TRUE                          | 5.696928          | 0.001064373                 | TRUE                          | 5.666359    |
| hsa-miR-495_st      | 3.643177          | 0.6649976                   | FALSE                         | 3.881181          | 0.6413472                   | FALSE                         | 3.762179    |
| hsa-miR-496_st      | 4.112961          | 0.5713509                   | FALSE                         | 3.798505          | 0.8244288                   | FALSE                         | 3.955733    |
| hsa-miR-497_st      | 5.947753          | 0.00012296                  | TRUE                          | 6.171935          | 8.87E-05                    | TRUE                          | 6.059844    |
| hsa-miR-497-star_st | 4.02303           | 0.6326542                   | FALSE                         | 4.04428           | 0.5024709                   | FALSE                         | 4.033655    |
| hsa-miR-498_st      | 4.923378          | 0.06908072                  | FALSE                         | 5.032862          | 0.02071069                  | TRUE                          | 4.97812     |
| hsa-miR-499-3p_st   | 3.97771           | 0.303127                    | FALSE                         | 3.915286          | 0.4529903                   | FALSE                         | 3.946498    |
| hsa-miR-499-5p_st   | 4.207151          | 0.3831833                   | FALSE                         | 4.057351          | 0.5395135                   | FALSE                         | 4.132251    |
| hsa-miR-500_st      | 6.958417          | 3.83E-08                    | TRUE                          | 6.749035          | 1.73E-06                    | TRUE                          | 6.853726    |
| hsa-miR-500-star_st | 6.369739          | 0.00046875                  | TRUE                          | 6.942269          | 0.00034341                  | TRUE                          | 6.656004    |
| hsa-miR-501-3p_st   | 5.932824          | 0.002114834                 | TRUE                          | 5.872178          | 0.002798033                 | TRUE                          | 5.902501    |
| hsa-miR-501-5p_st   | 5.710539          | 0.000469972                 | TRUE                          | 4.877228          | 0.05049802                  | TRUE                          | 5.2938835   |
| hsa-miR-502-3p_st   | 6.405606          | 2.61E-05                    | TRUE                          | 6.763336          | 1.73E-06                    | TRUE                          | 6.584471    |
| hsa-miR-502-5p_st   | 4.367465          | 0.1168102                   | FALSE                         | 4.300923          | 0.312056                    | FALSE                         | 4.334194    |
| hsa-miR-503_st      | 10.90164          | 2.05E-08                    | TRUE                          | 11.2476           | 2.05E-08                    | TRUE                          | 11.07462    |
| hsa-miR-504_st      | 4.468273          | 0.1609424                   | FALSE                         | 4.05108           | 0.5400748                   | FALSE                         | 4.2596765   |
| hsa-miR-505_st      | 7.240119          | 2.05E-08                    | TRUE                          | 7.18032           | 3.83E-08                    | TRUE                          | 7.2102195   |
| hsa-miR-505-star_st | 6.684371          | 4.57E-07                    | TRUE                          | 7.2526            | 3.83E-08                    | TRUE                          | 6.9684855   |
| hsa-miR-506_st      | 3.729508          | 0.7880169                   | FALSE                         | 3.639535          | 0.9617266                   | FALSE                         | 3.6845215   |
| hsa-miR-507_st      | 3.553063          | 0.9707584                   | FALSE                         | 3.553809          | 0.9820151                   | FALSE                         | 3.553436    |
| hsa-miR-508-3p_st   | 4.112099          | 0.2828276                   | FALSE                         | 4.081444          | 0.2009154                   | FALSE                         | 4.0967715   |
| hsa-miR-508-5p_st   | 4.027504          | 0.4967488                   | FALSE                         | 4.18158           | 0.3784354                   | FALSE                         | 4.104542    |
| hsa-miR-509-3-5p_st | 3.76935           | 0.8387579                   | FALSE                         | 4.141474          | 0.4139936                   | FALSE                         | 3.955412    |
| hsa-miR-509-3p_st   | 3.452567          | 0.9918223                   | FALSE                         | 4.039241          | 0.48378                     | FALSE                         | 3.745904    |
| hsa-miR-509-5p_st   | 4.207032          | 0.1751283                   | FALSE                         | 4.231334          | 0.2039361                   | FALSE                         | 4.219183    |
| hsa-miR-510_st      | 3.700382          | 0.9637713                   | FALSE                         | 4.072307          | 0.5242771                   | FALSE                         | 3.8863445   |

| ProbeSet Name        | Hey cell Signal_1 | p-value (Hey cell Signal_1) | Detection (Hey cell Signal_1) | Hey cell Signal_2 | p-value (Hey cell Signal_2) | Detection (Hey cell Signal_2) | Mean signal |
|----------------------|-------------------|-----------------------------|-------------------------------|-------------------|-----------------------------|-------------------------------|-------------|
| hsa-miR-511_st       | 3.674974          | 0.9268514                   | FALSE                         | 3.882509          | 0.8105507                   | FALSE                         | 3.7787415   |
| hsa-miR-512-3p_st    | 3.569501          | 0.4812775                   | FALSE                         | 3.899404          | 0.3395547                   | FALSE                         | 3.7344525   |
| hsa-miR-512-5p_st    | 4.254316          | 0.4885301                   | FALSE                         | 3.857541          | 0.6884778                   | FALSE                         | 4.0559285   |
| hsa-miR-513a-3p_st   | 4.115269          | 0.6599474                   | FALSE                         | 3.986516          | 0.7921931                   | FALSE                         | 4.0508925   |
| hsa-miR-513a-5p_st   | 3.770756          | 0.6434341                   | FALSE                         | 3.789649          | 0.7823306                   | FALSE                         | 3.7802025   |
| hsa-miR-513b_st      | 4.080624          | 0.3078528                   | FALSE                         | 3.990754          | 0.7314004                   | FALSE                         | 4.035689    |
| hsa-miR-513c_st      | 3.960111          | 0.8368392                   | FALSE                         | 3.789409          | 0.8173334                   | FALSE                         | 3.87476     |
| hsa-miR-514_st       | 3.815658          | 0.4655952                   | FALSE                         | 4.020171          | 0.3475384                   | FALSE                         | 3.9179145   |
| hsa-miR-515-3p_st    | 3.887777          | 0.9050608                   | FALSE                         | 3.785647          | 0.8413139                   | FALSE                         | 3.836712    |
| hsa-miR-515-5p_st    | 3.934307          | 0.8038064                   | FALSE                         | 4.053321          | 0.6596034                   | FALSE                         | 3.993814    |
| hsa-miR-516a-3p_st   | 3.594727          | 0.9901389                   | FALSE                         | 3.869199          | 0.9525231                   | FALSE                         | 3.731963    |
| hsa-miR-516a-5p_st   | 3.659872          | 0.9910498                   | FALSE                         | 4.016975          | 0.5766147                   | FALSE                         | 3.8384235   |
| hsa-miR-516b_st      | 3.837273          | 0.836305                    | FALSE                         | 3.800865          | 0.9059952                   | FALSE                         | 3.819069    |
| hsa-miR-516b-star_st | 3.782105          | 0.8499294                   | FALSE                         | 3.573227          | 0.9714102                   | FALSE                         | 3.677666    |
| hsa-miR-517a_st      | 3.974908          | 0.6946518                   | FALSE                         | 4.133779          | 0.5396692                   | FALSE                         | 4.0543435   |
| hsa-miR-517b_st      | 3.729508          | 0.9617728                   | FALSE                         | 3.683705          | 0.9860308                   | FALSE                         | 3.7066065   |
| hsa-miR-517c_st      | 3.611803          | 0.9917904                   | FALSE                         | 3.888401          | 0.8348274                   | FALSE                         | 3.750102    |
| hsa-miR-517-star_st  | 4.11736           | 0.2690832                   | FALSE                         | 4.176542          | 0.2357864                   | FALSE                         | 4.146951    |
| hsa-miR-518a-3p_st   | 3.446815          | 0.9766951                   | FALSE                         | 3.662751          | 0.8118929                   | FALSE                         | 3.554783    |
| hsa-miR-518a-5p_st   | 3.923002          | 0.7302512                   | FALSE                         | 3.503353          | 0.9398805                   | FALSE                         | 3.7131775   |
| hsa-miR-518b_st      | 3.98006           | 0.7564362                   | FALSE                         | 4.068021          | 0.7111939                   | FALSE                         | 4.0240405   |
| hsa-miR-518c_st      | 3.935116          | 0.1652158                   | FALSE                         | 4.054295          | 0.1718797                   | FALSE                         | 3.9947055   |
| hsa-miR-518c-star_st | 3.730274          | 0.8445377                   | FALSE                         | 3.559711          | 0.9883332                   | FALSE                         | 3.6449925   |
| hsa-miR-518d-3p_st   | 3.819478          | 0.6601523                   | FALSE                         | 4.070041          | 0.5186864                   | FALSE                         | 3.9447595   |
| hsa-miR-518d-5p_st   | 4.339338          | 0.3219203                   | FALSE                         | 4.050632          | 0.5627415                   | FALSE                         | 4.194985    |
| hsa-miR-518e_st      | 3.995858          | 0.6963575                   | FALSE                         | 4.08956           | 0.3417127                   | FALSE                         | 4.042709    |
| hsa-miR-518e-star_st | 3.90198           | 0.5765526                   | FALSE                         | 3.889378          | 0.7111939                   | FALSE                         | 3.895679    |
| hsa-miR-518f_st      | 4.093259          | 0.3845177                   | FALSE                         | 3.587891          | 0.8886055                   | FALSE                         | 3.840575    |
| hsa-miR-518f-star_st | 3.907851          | 0.5531505                   | FALSE                         | 3.483429          | 0.8591417                   | FALSE                         | 3.69564     |
| hsa-miR-519a_st      | 3.835804          | 0.7019257                   | FALSE                         | 3.707371          | 0.930776                    | FALSE                         | 3.7715875   |
| hsa-miR-519a-star_st | 3.54856           | 0.9363923                   | FALSE                         | 3.52765           | 0.9913279                   | FALSE                         | 3.538105    |
| hsa-miR-519b-3p_st   | 3.812804          | 0.5596753                   | FALSE                         | 4.203683          | 0.1920122                   | FALSE                         | 4.0082435   |
| hsa-miR-519b-5p_st   | 3.783021          | 0.6547992                   | FALSE                         | 3.649988          | 0.8089203                   | FALSE                         | 3.7165045   |
| hsa-miR-519c-3p_st   | 3.667849          | 0.9846988                   | FALSE                         | 4.023116          | 0.6396275                   | FALSE                         | 3.8454825   |
| hsa-miR-519c-5p_st   | 4.014771          | 0.4678391                   | FALSE                         | 3.585886          | 0.9495234                   | FALSE                         | 3.8003285   |
| hsa-miR-519d_st      | 3.795563          | 0.941078                    | FALSE                         | 4.035985          | 0.5593826                   | FALSE                         | 3.915774    |
| hsa-miR-519e_st      | 4.110226          | 0.5817406                   | FALSE                         | 4.143016          | 0.3968859                   | FALSE                         | 4.126621    |
| hsa-miR-519e-star_st | 3.642294          | 0.9390351                   | FALSE                         | 3.944427          | 0.6528597                   | FALSE                         | 3.7933605   |
| hsa-miR-520a-3p_st   | 3.892367          | 0.5456793                   | FALSE                         | 3.708177          | 0.6908869                   | FALSE                         | 3.800272    |
| hsa-miR-520a-5p_st   | 4.091393          | 0.5226581                   | FALSE                         | 3.879119          | 0.841112                    | FALSE                         | 3.985256    |

| ProbeSet Name        | Hey cell Signal_1 | p-value (Hey cell Signal_1) | Detection (Hey cell Signal_1) | Hey cell Signal_2 | p-value (Hey cell Signal_2) | Detection (Hey cell Signal_2) | Mean signal |
|----------------------|-------------------|-----------------------------|-------------------------------|-------------------|-----------------------------|-------------------------------|-------------|
| hsa-miR-520b_st      | 4.337839          | 0.3780008                   | FALSE                         | 4.300296          | 0.2793784                   | FALSE                         | 4.3190675   |
| hsa-miR-520c-3p_st   | 4.1485            | 0.3936969                   | FALSE                         | 3.918572          | 0.8475497                   | FALSE                         | 4.033536    |
| hsa-miR-520c-5p_st   | 4.011654          | 0.7739521                   | FALSE                         | 4.00046           | 0.6926981                   | FALSE                         | 4.006057    |
| hsa-miR-520d-3p_st   | 4.086782          | 0.2201285                   | FALSE                         | 3.962957          | 0.3373818                   | FALSE                         | 4.0248695   |
| hsa-miR-520d-5p_st   | 3.938997          | 0.6777679                   | FALSE                         | 3.878698          | 0.8134534                   | FALSE                         | 3.9088475   |
| hsa-miR-520e_st      | 4.05978           | 0.5080643                   | FALSE                         | 4.066619          | 0.5829808                   | FALSE                         | 4.0631995   |
| hsa-miR-520f_st      | 3.492955          | 0.9946665                   | FALSE                         | 3.869868          | 0.8573419                   | FALSE                         | 3.6814115   |
| hsa-miR-520g_st      | 4.275958          | 0.2914418                   | FALSE                         | 4.080223          | 0.3941785                   | FALSE                         | 4.1780905   |
| hsa-miR-520h_st      | 3.870297          | 0.5380455                   | FALSE                         | 4.01817           | 0.5180748                   | FALSE                         | 3.9442335   |
| hsa-miR-521_st       | 3.972246          | 0.6190668                   | FALSE                         | 3.815179          | 0.8507148                   | FALSE                         | 3.8937125   |
| hsa-miR-522_st       | 3.664089          | 0.9579136                   | FALSE                         | 4.038481          | 0.5656908                   | FALSE                         | 3.851285    |
| hsa-miR-522-star_st  | 3.871367          | 0.6429819                   | FALSE                         | 4.093426          | 0.6082008                   | FALSE                         | 3.9823965   |
| hsa-miR-523_st       | 4.096522          | 0.538012                    | FALSE                         | 4.078319          | 0.6047758                   | FALSE                         | 4.0874205   |
| hsa-miR-523-star_st  | 3.782104          | 0.6048398                   | FALSE                         | 3.823666          | 0.8886678                   | FALSE                         | 3.802885    |
| hsa-miR-524-3p_st    | 3.895343          | 0.4904378                   | FALSE                         | 3.747505          | 0.4635865                   | FALSE                         | 3.821424    |
| hsa-miR-524-5p_st    | 3.621454          | 0.9731191                   | FALSE                         | 3.925102          | 0.7878731                   | FALSE                         | 3.773278    |
| hsa-miR-525-3p_st    | 3.744776          | 0.6180672                   | FALSE                         | 3.968782          | 0.495066                    | FALSE                         | 3.856779    |
| hsa-miR-525-5p_st    | 3.855948          | 0.8386667                   | FALSE                         | 3.596804          | 0.9736227                   | FALSE                         | 3.726376    |
| hsa-miR-526a_st      | 4.182644          | 0.3855365                   | FALSE                         | 3.871162          | 0.540667                    | FALSE                         | 4.026903    |
| hsa-miR-526b_st      | 4.17387           | 0.4639899                   | FALSE                         | 4.260913          | 0.4129297                   | FALSE                         | 4.2173915   |
| hsa-miR-526b-star_st | 3.754835          | 0.874871                    | FALSE                         | 3.844364          | 0.9176131                   | FALSE                         | 3.7995995   |
| hsa-miR-527_st       | 4.061071          | 0.5455509                   | FALSE                         | 4.016181          | 0.5335331                   | FALSE                         | 4.038626    |
| hsa-miR-532-3p_st    | 5.621797          | 0.02951488                  | TRUE                          | 5.43602           | 0.05370051                  | TRUE                          | 5.5289085   |
| hsa-miR-532-5p_st    | 7.707351          | 1.17E-05                    | TRUE                          | 7.949915          | 1.17E-05                    | TRUE                          | 7.828633    |
| hsa-miR-539_st       | 4.064056          | 0.4683201                   | FALSE                         | 4.390618          | 0.1824084                   | FALSE                         | 4.227337    |
| hsa-miR-541_st       | 3.782105          | 0.5818397                   | FALSE                         | 3.635484          | 0.8042535                   | FALSE                         | 3.7087945   |
| hsa-miR-541-star_st  | 4.115592          | 0.5804335                   | FALSE                         | 3.894967          | 0.7949302                   | FALSE                         | 4.0052795   |
| hsa-miR-542-3p_st    | 4.364634          | 0.1661289                   | FALSE                         | 4.146534          | 0.1395894                   | FALSE                         | 4.255584    |
| hsa-miR-542-5p_st    | 5.453632          | 0.007863452                 | TRUE                          | 5.591519          | 0.004052761                 | TRUE                          | 5.5225755   |
| hsa-miR-543_st       | 3.985187          | 0.5953295                   | FALSE                         | 3.91582           | 0.6616709                   | FALSE                         | 3.9505035   |
| hsa-miR-544_st       | 3.76759           | 0.7260374                   | FALSE                         | 3.734674          | 0.6396275                   | FALSE                         | 3.751132    |
| hsa-miR-545_st       | 3.849599          | 0.461124                    | FALSE                         | 3.766152          | 0.7229632                   | FALSE                         | 3.8078755   |
| hsa-miR-545-star_st  | 3.642954          | 0.5361155                   | FALSE                         | 3.636141          | 0.4824148                   | FALSE                         | 3.6395475   |
| hsa-miR-548a-3p_st   | 4.435707          | 0.1014314                   | FALSE                         | 4.077708          | 0.2649289                   | FALSE                         | 4.2567075   |
| hsa-miR-548a-5p_st   | 4.122822          | 0.4710414                   | FALSE                         | 3.672432          | 0.9109722                   | FALSE                         | 3.897627    |
| hsa-miR-548b-3p_st   | 3.958543          | 0.6361713                   | FALSE                         | 4.160802          | 0.3803903                   | FALSE                         | 4.0596725   |
| hsa-miR-548b-5p_st   | 3.782105          | 0.8258841                   | FALSE                         | 3.932126          | 0.8585168                   | FALSE                         | 3.8571155   |
| hsa-miR-548c-3p_st   | 4.123325          | 0.1675852                   | FALSE                         | 4.135272          | 0.3233835                   | FALSE                         | 4.1292985   |
| hsa-miR-548c-5p_st   | 3.89218           | 0.7772719                   | FALSE                         | 4.094689          | 0.7127033                   | FALSE                         | 3.9934345   |
| hsa-miR-548d-3p_st   | 4.123924          | 0.4064913                   | FALSE                         | 3.902237          | 0.8981776                   | FALSE                         | 4.0130805   |

| ProbeSet Name        | Hey cell Signal_1 | p-value (Hey cell Signal_1) | Detection (Hey cell Signal_1) | Hey cell Signal_2 | p-value (Hey cell Signal_2) | Detection (Hey cell Signal_2) | Mean signal |
|----------------------|-------------------|-----------------------------|-------------------------------|-------------------|-----------------------------|-------------------------------|-------------|
| hsa-miR-548d-5p_st   | 3.922039          | 0.5990874                   | FALSE                         | 3.878307          | 0.7525445                   | FALSE                         | 3.900173    |
| hsa-miR-548e_st      | 3.988124          | 0.7028735                   | FALSE                         | 3.908541          | 0.7590316                   | FALSE                         | 3.9483325   |
| hsa-miR-548f_st      | 3.898425          | 0.6761805                   | FALSE                         | 3.997552          | 0.4323498                   | FALSE                         | 3.9479885   |
| hsa-miR-548g_st      | 4.185207          | 0.296577                    | FALSE                         | 4.228869          | 0.2396899                   | FALSE                         | 4.207038    |
| hsa-miR-548h_st      | 3.766775          | 0.9290358                   | FALSE                         | 3.89809           | 0.9099492                   | FALSE                         | 3.8324325   |
| hsa-miR-548i_st      | 4.097689          | 0.3057609                   | FALSE                         | 4.082894          | 0.5715425                   | FALSE                         | 4.0902915   |
| hsa-miR-548j_st      | 3.613161          | 0.9477497                   | FALSE                         | 3.928214          | 0.9417311                   | FALSE                         | 3.7706875   |
| hsa-miR-548k_st      | 4.187449          | 0.3267375                   | FALSE                         | 4.09901           | 0.3146196                   | FALSE                         | 4.1432295   |
| hsa-miR-548l_st      | 3.655862          | 0.9556123                   | FALSE                         | 3.798832          | 0.8584221                   | FALSE                         | 3.727347    |
| hsa-miR-548m_st      | 3.852826          | 0.7839063                   | FALSE                         | 3.641637          | 0.7444724                   | FALSE                         | 3.7472315   |
| hsa-miR-548n_st      | 3.775766          | 0.5584728                   | FALSE                         | 3.938683          | 0.2880492                   | FALSE                         | 3.8572245   |
| hsa-miR-548o_st      | 3.741035          | 0.9367085                   | FALSE                         | 3.801571          | 0.8895523                   | FALSE                         | 3.771303    |
| hsa-miR-548p_st      | 4.067286          | 0.1412653                   | FALSE                         | 4.18909           | 0.1202655                   | FALSE                         | 4.128188    |
| hsa-miR-549_st       | 3.631453          | 0.6372942                   | FALSE                         | 3.860529          | 0.5487206                   | FALSE                         | 3.745991    |
| hsa-miR-550_st       | 5.000689          | 0.07637079                  | FALSE                         | 5.149182          | 0.0550432                   | TRUE                          | 5.0749355   |
| hsa-miR-550-star_st  | 5.805284          | 0.000506872                 | TRUE                          | 5.441785          | 0.002608784                 | TRUE                          | 5.6235345   |
| hsa-miR-551a_st      | 3.750712          | 0.5567772                   | FALSE                         | 3.891219          | 0.7821946                   | FALSE                         | 3.8209655   |
| hsa-miR-551b_st      | 4.453907          | 0.17614                     | FALSE                         | 4.685008          | 0.07692655                  | FALSE                         | 4.5694575   |
| hsa-miR-551b-star_st | 6.027129          | 0.001486885                 | TRUE                          | 5.956176          | 0.001540874                 | TRUE                          | 5.9916525   |
| hsa-miR-552_st       | 4.052038          | 0.6027051                   | FALSE                         | 4.190989          | 0.4363961                   | FALSE                         | 4.1215135   |
| hsa-miR-553_st       | 4.043039          | 0.297874                    | FALSE                         | 4.113454          | 0.2950224                   | FALSE                         | 4.0782465   |
| hsa-miR-554_st       | 4.034569          | 0.2903994                   | FALSE                         | 3.774985          | 0.7338743                   | FALSE                         | 3.904777    |
| hsa-miR-555_st       | 3.97748           | 0.6721056                   | FALSE                         | 3.889037          | 0.8899302                   | FALSE                         | 3.9332585   |
| hsa-miR-556-3p_st    | 3.913007          | 0.5531458                   | FALSE                         | 3.847717          | 0.4647327                   | FALSE                         | 3.880362    |
| hsa-miR-556-5p_st    | 3.619651          | 0.4554712                   | FALSE                         | 3.681614          | 0.5919474                   | FALSE                         | 3.6506325   |
| hsa-miR-557_st       | 4.052978          | 0.5468037                   | FALSE                         | 3.93513           | 0.4842668                   | FALSE                         | 3.994054    |
| hsa-miR-558_st       | 4.079658          | 0.6612121                   | FALSE                         | 3.945654          | 0.698099                    | FALSE                         | 4.012656    |
| hsa-miR-559_st       | 4.585574          | 0.0617639                   | FALSE                         | 4.699267          | 0.02601264                  | TRUE                          | 4.6424205   |
| hsa-miR-561_st       | 4.25989           | 0.257692                    | FALSE                         | 4.442163          | 0.1322562                   | FALSE                         | 4.3510265   |
| hsa-miR-562_st       | 3.74159           | 0.9707584                   | FALSE                         | 3.840666          | 0.6838791                   | FALSE                         | 3.791128    |
| hsa-miR-563_st       | 3.831858          | 0.7530136                   | FALSE                         | 3.651846          | 0.980956                    | FALSE                         | 3.741852    |
| hsa-miR-564_st       | 4.387299          | 0.2430212                   | FALSE                         | 4.324512          | 0.2604889                   | FALSE                         | 4.3559055   |
| hsa-miR-566_st       | 3.968199          | 0.7566602                   | FALSE                         | 4.228718          | 0.4869422                   | FALSE                         | 4.0984585   |
| hsa-miR-567_st       | 3.858776          | 0.8566658                   | FALSE                         | 3.90241           | 0.8221202                   | FALSE                         | 3.880593    |
| hsa-miR-568_st       | 3.837273          | 0.891726                    | FALSE                         | 3.80881           | 0.6806163                   | FALSE                         | 3.8230415   |
| hsa-miR-569_st       | 4.288822          | 0.3350515                   | FALSE                         | 3.845351          | 0.7237591                   | FALSE                         | 4.0670865   |
| hsa-miR-570_st       | 3.799477          | 0.3961032                   | FALSE                         | 4.269595          | 0.1242473                   | FALSE                         | 4.034536    |
| hsa-miR-571_st       | 3.952803          | 0.7958874                   | FALSE                         | 3.878307          | 0.8319772                   | FALSE                         | 3.915555    |
| hsa-miR-572_st       | 5.739026          | 0.0828618                   | FALSE                         | 5.631927          | 0.08883692                  | FALSE                         | 5.6854765   |
| hsa-miR-573_st       | 3.674339          | 0.938373                    | FALSE                         | 3.917438          | 0.6027244                   | FALSE                         | 3.7958885   |

| ProbeSet Name       | Hey cell Signal_1 | p-value (Hey cell Signal_1) | Detection (Hey cell Signal_1) | Hey cell Signal_2 | p-value (Hey cell Signal_2) | Detection (Hey cell Signal_2) | Mean signal |
|---------------------|-------------------|-----------------------------|-------------------------------|-------------------|-----------------------------|-------------------------------|-------------|
| hsa-miR-574-3p_st   | 9.573371          | 6.24E-06                    | TRUE                          | 9.869659          | 2.86E-06                    | TRUE                          | 9.721515    |
| hsa-miR-574-5p_st   | 6.056917          | 4.03E-05                    | TRUE                          | 6.70692           | 2.46E-06                    | TRUE                          | 6.3819185   |
| hsa-miR-575_st      | 4.174225          | 0.3438007                   | FALSE                         | 4.128918          | 0.4440675                   | FALSE                         | 4.1515715   |
| hsa-miR-576-3p_st   | 4.062325          | 0.1818742                   | FALSE                         | 5.018163          | 0.009137175                 | TRUE                          | 4.540244    |
| hsa-miR-576-5p_st   | 4.309227          | 0.3277567                   | FALSE                         | 4.114842          | 0.5975484                   | FALSE                         | 4.2120345   |
| hsa-miR-577_st      | 3.697125          | 0.7745874                   | FALSE                         | 3.910249          | 0.5304001                   | FALSE                         | 3.803687    |
| hsa-miR-578_st      | 3.988124          | 0.1589409                   | FALSE                         | 3.703895          | 0.635302                    | FALSE                         | 3.8460095   |
| hsa-miR-579_st      | 3.894972          | 0.6434427                   | FALSE                         | 4.260057          | 0.3981457                   | FALSE                         | 4.0775145   |
| hsa-miR-580_st      | 3.825432          | 0.9764963                   | FALSE                         | 4.05              | 0.6289961                   | FALSE                         | 3.937716    |
| hsa-miR-581_st      | 3.784677          | 0.9610736                   | FALSE                         | 3.881181          | 0.7056739                   | FALSE                         | 3.832929    |
| hsa-miR-582-3p_st   | 3.952499          | 0.5505304                   | FALSE                         | 4.584504          | 0.0795037                   | FALSE                         | 4.2685015   |
| hsa-miR-582-5p_st   | 3.94685           | 0.4758968                   | FALSE                         | 4.252396          | 0.2398855                   | FALSE                         | 4.099623    |
| hsa-miR-583_st      | 3.970992          | 0.6032587                   | FALSE                         | 3.798147          | 0.7991463                   | FALSE                         | 3.8845695   |
| hsa-miR-584_st      | 7.447094          | 2.05E-08                    | TRUE                          | 7.624513          | 2.05E-08                    | TRUE                          | 7.5358035   |
| hsa-miR-585_st      | 3.880562          | 0.7307878                   | FALSE                         | 3.949141          | 0.7354065                   | FALSE                         | 3.9148515   |
| hsa-miR-586_st      | 4.109369          | 0.6185094                   | FALSE                         | 3.723502          | 0.9109722                   | FALSE                         | 3.9164355   |
| hsa-miR-587_st      | 4.069919          | 0.5610173                   | FALSE                         | 4.013098          | 0.5733172                   | FALSE                         | 4.0415085   |
| hsa-miR-588_st      | 4.045167          | 0.6005207                   | FALSE                         | 3.864943          | 0.8560448                   | FALSE                         | 3.955055    |
| hsa-miR-589_st      | 6.320792          | 0.000420883                 | TRUE                          | 6.224229          | 0.000921213                 | TRUE                          | 6.2725105   |
| hsa-miR-589-star_st | 7.344418          | 3.20E-05                    | TRUE                          | 7.850092          | 1.17E-05                    | TRUE                          | 7.597255    |
| hsa-miR-590-3p_st   | 3.769236          | 0.8349618                   | FALSE                         | 3.743622          | 0.4398704                   | FALSE                         | 3.756429    |
| hsa-miR-590-5p_st   | 4.695969          | 0.01694104                  | TRUE                          | 4.643748          | 0.0778811                   | FALSE                         | 4.6698585   |
| hsa-miR-591_st      | 4.220948          | 0.3650243                   | FALSE                         | 4.374566          | 0.1967154                   | FALSE                         | 4.297757    |
| hsa-miR-592_st      | 3.701924          | 0.9558689                   | FALSE                         | 3.545642          | 0.9315744                   | FALSE                         | 3.623783    |
| hsa-miR-593_st      | 4.837232          | 0.04121908                  | TRUE                          | 4.928342          | 0.04677261                  | TRUE                          | 4.882787    |
| hsa-miR-593-star_st | 3.101588          | 0.9680594                   | FALSE                         | 2.774193          | 0.9951157                   | FALSE                         | 2.9378905   |
| hsa-miR-595_st      | 3.912405          | 0.5413811                   | FALSE                         | 3.854763          | 0.5906612                   | FALSE                         | 3.883584    |
| hsa-miR-596_st      | 4.486268          | 0.346769                    | FALSE                         | 4.797775          | 0.2479003                   | FALSE                         | 4.6420215   |
| hsa-miR-597_st      | 3.76042           | 0.8244639                   | FALSE                         | 3.434942          | 0.8179352                   | FALSE                         | 3.597681    |
| hsa-miR-598_st      | 4.756566          | 0.024415                    | TRUE                          | 4.618736          | 0.06093652                  | FALSE                         | 4.687651    |
| hsa-miR-599_st      | 3.730285          | 0.8016428                   | FALSE                         | 3.887381          | 0.7078271                   | FALSE                         | 3.808833    |
| hsa-miR-600_st      | 3.937282          | 0.709349                    | FALSE                         | 3.816734          | 0.4877967                   | FALSE                         | 3.877008    |
| hsa-miR-601_st      | 4.001557          | 0.7038789                   | FALSE                         | 4.179389          | 0.3474648                   | FALSE                         | 4.090473    |
| hsa-miR-602_st      | 6.240932          | 0.09359368                  | FALSE                         | 6.378741          | 0.08677292                  | FALSE                         | 6.3098365   |
| hsa-miR-603_st      | 4.014771          | 0.5730008                   | FALSE                         | 3.844903          | 0.6187958                   | FALSE                         | 3.929837    |
| hsa-miR-604_st      | 4.029827          | 0.7867348                   | FALSE                         | 4.084137          | 0.4950534                   | FALSE                         | 4.056982    |
| hsa-miR-605_st      | 4.421587          | 0.241398                    | FALSE                         | 4.219505          | 0.3477647                   | FALSE                         | 4.320546    |
| hsa-miR-606_st      | 4.319701          | 0.0615292                   | FALSE                         | 4.738008          | 0.006407762                 | TRUE                          | 4.5288545   |
| hsa-miR-607_st      | 3.724085          | 0.8822266                   | FALSE                         | 3.925879          | 0.5787995                   | FALSE                         | 3.824982    |
| hsa-miR-608_st      | 3.301695          | 0.9253837                   | FALSE                         | 3.180124          | 0.9079857                   | FALSE                         | 3.2409095   |

| ProbeSet Name       | Hey cell Signal_1 | p-value (Hey cell Signal_1) | Detection (Hey cell Signal_1) | Hey cell Signal_2 | p-value (Hey cell Signal_2) | Detection (Hey cell Signal_2) | Mean signal |
|---------------------|-------------------|-----------------------------|-------------------------------|-------------------|-----------------------------|-------------------------------|-------------|
| hsa-miR-609_st      | 3.885145          | 0.7148587                   | FALSE                         | 3.882844          | 0.9429455                   | FALSE                         | 3.8839945   |
| hsa-miR-610_st      | 4.39193           | 0.2015708                   | FALSE                         | 4.456765          | 0.1652174                   | FALSE                         | 4.4243475   |
| hsa-miR-611_st      | 3.061375          | 0.9312414                   | FALSE                         | 2.827015          | 0.9260019                   | FALSE                         | 2.944195    |
| hsa-miR-612_st      | 3.671489          | 0.6762174                   | FALSE                         | 4.529558          | 0.5238747                   | FALSE                         | 4.1005235   |
| hsa-miR-613_st      | 3.671229          | 0.7860206                   | FALSE                         | 3.878307          | 0.6387182                   | FALSE                         | 3.774768    |
| hsa-miR-614_st      | 3.699297          | 0.9065493                   | FALSE                         | 4.153728          | 0.5260763                   | FALSE                         | 3.9265125   |
| hsa-miR-615-3p_st   | 4.520157          | 0.1677212                   | FALSE                         | 4.67928           | 0.1290785                   | FALSE                         | 4.5997185   |
| hsa-miR-615-5p_st   | 2.89671           | 0.9738274                   | FALSE                         | 3.138088          | 0.9211925                   | FALSE                         | 3.017399    |
| hsa-miR-616_st      | 4.146812          | 0.5649739                   | FALSE                         | 3.668056          | 0.8064005                   | FALSE                         | 3.907434    |
| hsa-miR-616-star_st | 4.034314          | 0.6125814                   | FALSE                         | 3.839918          | 0.8400822                   | FALSE                         | 3.937116    |
| hsa-miR-617_st      | 4.082909          | 0.253227                    | FALSE                         | 3.795806          | 0.4383041                   | FALSE                         | 3.9393575   |
| hsa-miR-618_st      | 4.152257          | 0.4524161                   | FALSE                         | 4.064955          | 0.488651                    | FALSE                         | 4.108606    |
| hsa-miR-619_st      | 4.527741          | 0.1280131                   | FALSE                         | 4.537824          | 0.235976                    | FALSE                         | 4.5327825   |
| hsa-miR-620_st      | 3.719563          | 0.7538403                   | FALSE                         | 3.764977          | 0.8739322                   | FALSE                         | 3.74227     |
| hsa-miR-621_st      | 3.701981          | 0.8649791                   | FALSE                         | 4.135271          | 0.4527526                   | FALSE                         | 3.918626    |
| hsa-miR-622_st      | 4.494615          | 0.3530487                   | FALSE                         | 4.295579          | 0.3288879                   | FALSE                         | 4.395097    |
| hsa-miR-623_st      | 4.796748          | 0.140741                    | FALSE                         | 4.409204          | 0.3451956                   | FALSE                         | 4.602976    |
| hsa-miR-624_st      | 3.820546          | 0.9045044                   | FALSE                         | 3.935821          | 0.7429042                   | FALSE                         | 3.8781835   |
| hsa-miR-624-star_st | 4.110322          | 0.3212123                   | FALSE                         | 4.411986          | 0.2021871                   | FALSE                         | 4.261154    |
| hsa-miR-625_st      | 9.533315          | 2.05E-08                    | TRUE                          | 9.675993          | 2.05E-08                    | TRUE                          | 9.604654    |
| hsa-miR-625-star_st | 4.317377          | 0.2139484                   | FALSE                         | 4.291561          | 0.2633171                   | FALSE                         | 4.304469    |
| hsa-miR-626_st      | 4.578326          | 0.07557661                  | FALSE                         | 4.663607          | 0.04854319                  | TRUE                          | 4.6209665   |
| hsa-miR-627_st      | 4.338558          | 0.05275135                  | TRUE                          | 4.37548           | 0.0667443                   | FALSE                         | 4.357019    |
| hsa-miR-628-3p_st   | 4.752416          | 0.09404901                  | FALSE                         | 4.732757          | 0.05638837                  | TRUE                          | 4.7425865   |
| hsa-miR-628-5p_st   | 3.941535          | 0.4569422                   | FALSE                         | 4.098099          | 0.4696396                   | FALSE                         | 4.019817    |
| hsa-miR-629_st      | 3.929043          | 0.3351543                   | FALSE                         | 4.250291          | 0.1429395                   | FALSE                         | 4.089667    |
| hsa-miR-629-star_st | 4.23952           | 0.3615893                   | FALSE                         | 4.70037           | 0.1435662                   | FALSE                         | 4.469945    |
| hsa-miR-630_st      | 3.796089          | 0.868533                    | FALSE                         | 3.917711          | 0.7488306                   | FALSE                         | 3.8569      |
| hsa-miR-631_st      | 4.130648          | 0.3783777                   | FALSE                         | 3.782257          | 0.6197174                   | FALSE                         | 3.9564525   |
| hsa-miR-632_st      | 3.996082          | 0.5453847                   | FALSE                         | 4.065454          | 0.5227342                   | FALSE                         | 4.030768    |
| hsa-miR-633_st      | 3.817396          | 0.8726658                   | FALSE                         | 3.974389          | 0.4691718                   | FALSE                         | 3.8958925   |
| hsa-miR-634_st      | 4.655919          | 0.09171977                  | FALSE                         | 4.104418          | 0.454296                    | FALSE                         | 4.3801685   |
| hsa-miR-635_st      | 4.331712          | 0.5049654                   | FALSE                         | 4.657455          | 0.1455988                   | FALSE                         | 4.4945835   |
| hsa-miR-636_st      | 4.223406          | 0.4220848                   | FALSE                         | 4.648967          | 0.2172398                   | FALSE                         | 4.4361865   |
| hsa-miR-637_st      | 4.575109          | 0.2992126                   | FALSE                         | 4.878978          | 0.252205                    | FALSE                         | 4.7270435   |
| hsa-miR-638_st      | 11.96706          | 1.29E-07                    | TRUE                          | 12.13443          | 1.29E-07                    | TRUE                          | 12.050745   |
| hsa-miR-639_st      | 4.184123          | 0.3929093                   | FALSE                         | 3.494496          | 0.7595924                   | FALSE                         | 3.8393095   |
| hsa-miR-640_st      | 4.01007           | 0.7063541                   | FALSE                         | 3.935821          | 0.7043582                   | FALSE                         | 3.9729455   |
| hsa-miR-641_st      | 5.009493          | 0.01029102                  | TRUE                          | 5.135797          | 0.008609486                 | TRUE                          | 5.072645    |
| hsa-miR-642_st      | 4.444835          | 0.2325747                   | FALSE                         | 4.412399          | 0.1949984                   | FALSE                         | 4.428617    |

| ProbeSet Name       | Hey cell Signal_1 | p-value (Hey cell Signal_1) | Detection (Hey cell Signal_1) | Hey cell Signal_2 | p-value (Hey cell Signal_2) | Detection (Hey cell Signal_2) | Mean signal |
|---------------------|-------------------|-----------------------------|-------------------------------|-------------------|-----------------------------|-------------------------------|-------------|
| hsa-miR-643_st      | 3.785896          | 0.7891093                   | FALSE                         | 4.003252          | 0.6595603                   | FALSE                         | 3.894574    |
| hsa-miR-644_st      | 3.852104          | 0.8671445                   | FALSE                         | 4.097754          | 0.6654454                   | FALSE                         | 3.974929    |
| hsa-miR-645_st      | 3.808683          | 0.6666657                   | FALSE                         | 3.703895          | 0.8172026                   | FALSE                         | 3.756289    |
| hsa-miR-646_st      | 3.988124          | 0.6331156                   | FALSE                         | 4.038856          | 0.6452075                   | FALSE                         | 4.01349     |
| hsa-miR-647_st      | 3.47911           | 0.9536732                   | FALSE                         | 3.434942          | 0.9973829                   | FALSE                         | 3.457026    |
| hsa-miR-648_st      | 4.162684          | 0.4554332                   | FALSE                         | 4.202701          | 0.3985997                   | FALSE                         | 4.1826925   |
| hsa-miR-649_st      | 3.919739          | 0.718143                    | FALSE                         | 3.908577          | 0.7220761                   | FALSE                         | 3.914158    |
| hsa-miR-650_st      | 3.433351          | 0.9047038                   | FALSE                         | 3.92077           | 0.5202386                   | FALSE                         | 3.6770605   |
| hsa-miR-651_st      | 3.747785          | 0.9761488                   | FALSE                         | 3.818435          | 0.8452777                   | FALSE                         | 3.78311     |
| hsa-miR-652_st      | 7.901204          | 1.17E-05                    | TRUE                          | 8.065471          | 1.17E-05                    | TRUE                          | 7.9833375   |
| hsa-miR-653_st      | 4.0317            | 0.14131                     | FALSE                         | 3.766122          | 0.6322541                   | FALSE                         | 3.898911    |
| hsa-miR-654-3p_st   | 3.934767          | 0.6367003                   | FALSE                         | 3.823781          | 0.8838951                   | FALSE                         | 3.879274    |
| hsa-miR-654-5p_st   | 3.798463          | 0.6527658                   | FALSE                         | 3.593699          | 0.684297                    | FALSE                         | 3.696081    |
| hsa-miR-655_st      | 3.983079          | 0.7337719                   | FALSE                         | 3.935821          | 0.6719326                   | FALSE                         | 3.95945     |
| hsa-miR-656_st      | 3.841085          | 0.6846374                   | FALSE                         | 3.935821          | 0.807206                    | FALSE                         | 3.888453    |
| hsa-miR-657_st      | 3.859697          | 0.6693218                   | FALSE                         | 3.760372          | 0.7887769                   | FALSE                         | 3.8100345   |
| hsa-miR-658_st      | 4.62283           | 0.2675838                   | FALSE                         | 4.559347          | 0.4035289                   | FALSE                         | 4.5910885   |
| hsa-miR-659_st      | 4.454639          | 0.2119378                   | FALSE                         | 4.848621          | 0.102629                    | FALSE                         | 4.65163     |
| hsa-miR-660_st      | 6.288859          | 2.72E-05                    | TRUE                          | 6.293735          | 0.000108201                 | TRUE                          | 6.291297    |
| hsa-miR-661_st      | 3.322417          | 0.910138                    | FALSE                         | 3.677765          | 0.8028256                   | FALSE                         | 3.500091    |
| hsa-miR-662_st      | 3.959602          | 0.4995387                   | FALSE                         | 3.669387          | 0.7658755                   | FALSE                         | 3.8144945   |
| hsa-miR-663_st      | 10.5103           | 0.000178449                 | TRUE                          | 10.6648           | 0.000178449                 | TRUE                          | 10.58755    |
| hsa-miR-663b_st     | 3.736621          | 0.77376                     | FALSE                         | 3.408893          | 0.8076742                   | FALSE                         | 3.572757    |
| hsa-miR-664_st      | 4.570993          | 0.06838157                  | FALSE                         | 4.384512          | 0.1047572                   | FALSE                         | 4.4777525   |
| hsa-miR-664-star_st | 4.6711            | 0.1452551                   | FALSE                         | 4.663496          | 0.07869932                  | FALSE                         | 4.667298    |
| hsa-miR-665_st      | 5.055865          | 0.1493158                   | FALSE                         | 5.132016          | 0.1139892                   | FALSE                         | 5.0939405   |
| hsa-miR-668_st      | 3.840742          | 0.7383781                   | FALSE                         | 3.945145          | 0.6898683                   | FALSE                         | 3.8929435   |
| hsa-miR-671-3p_st   | 4.815671          | 0.1456338                   | FALSE                         | 4.5895            | 0.2107421                   | FALSE                         | 4.7025855   |
| hsa-miR-671-5p_st   | 8.231975          | 0.003990533                 | TRUE                          | 8.276594          | 0.003478216                 | TRUE                          | 8.2542845   |
| hsa-miR-675_st      | 4.643448          | 0.3352104                   | FALSE                         | 4.666546          | 0.3000176                   | FALSE                         | 4.654997    |
| hsa-miR-7_st        | 5.302485          | 0.001032183                 | TRUE                          | 4.330284          | 0.1059748                   | FALSE                         | 4.8163845   |
| hsa-miR-708_st      | 12.06751          | 2.05E-08                    | TRUE                          | 12.12757          | 2.05E-08                    | TRUE                          | 12.09754    |
| hsa-miR-708-star_st | 5.081185          | 0.004631702                 | TRUE                          | 5.325858          | 0.002653851                 | TRUE                          | 5.2035215   |
| hsa-miR-7-1-star_st | 5.471228          | 0.001428516                 | TRUE                          | 4.885294          | 0.02657487                  | TRUE                          | 5.178261    |
| hsa-miR-720_st      | 10.20363          | 2.47E-07                    | TRUE                          | 9.928072          | 2.47E-07                    | TRUE                          | 10.065851   |
| hsa-miR-7-2-star_st | 4.510819          | 0.1847057                   | FALSE                         | 4.699393          | 0.07472251                  | FALSE                         | 4.605106    |
| hsa-miR-744_st      | 8.70441           | 0.000628377                 | TRUE                          | 8.656784          | 0.000483581                 | TRUE                          | 8.680597    |
| hsa-miR-744-star_st | 4.632213          | 0.09065528                  | FALSE                         | 4.914126          | 0.02741246                  | TRUE                          | 4.7731695   |
| hsa-miR-758_st      | 3.859867          | 0.8754287                   | FALSE                         | 3.763794          | 0.8876556                   | FALSE                         | 3.8118305   |
| hsa-miR-760_st      | 4.837722          | 0.1274959                   | FALSE                         | 4.708109          | 0.1316313                   | FALSE                         | 4.7729155   |



| ProbeSet Name         | Hey cell Signal_1 | p-value (Hey cell Signal_1) | Detection (Hey cell Signal_1) | Hey cell Signal_2 | p-value (Hey cell Signal_2) | Detection (Hey cell Signal_2) | Mean signal |
|-----------------------|-------------------|-----------------------------|-------------------------------|-------------------|-----------------------------|-------------------------------|-------------|
| hsa-miR-765_st        | 4.046831          | 0.5632122                   | FALSE                         | 3.900065          | 0.817022                    | FALSE                         | 3.973448    |
| hsa-miR-766_st        | 4.719189          | 0.2758213                   | FALSE                         | 4.594862          | 0.3818856                   | FALSE                         | 4.6570255   |
| hsa-miR-767-3p_st     | 3.832144          | 0.9050608                   | FALSE                         | 4.239129          | 0.3776647                   | FALSE                         | 4.0356365   |
| hsa-miR-767-5p_st     | 4.433182          | 0.1346944                   | FALSE                         | 4.08751           | 0.4076909                   | FALSE                         | 4.260346    |
| hsa-miR-768-3p_st     | 8.48217           | 1.17E-05                    | TRUE                          | 8.017783          | 1.17E-05                    | TRUE                          | 8.2499765   |
| hsa-miR-768-5p_st     | 9.402832          | 2.05E-08                    | TRUE                          | 8.964705          | 2.05E-08                    | TRUE                          | 9.1837685   |
| hsa-miR-769-3p_st     | 4.759942          | 0.2246646                   | FALSE                         | 4.710318          | 0.1431998                   | FALSE                         | 4.73513     |
| hsa-miR-769-5p_st     | 6.481266          | 0.000308651                 | TRUE                          | 6.713896          | 0.000306987                 | TRUE                          | 6.597581    |
| hsa-miR-770-5p_st     | 3.848725          | 0.6435872                   | FALSE                         | 3.947297          | 0.6047476                   | FALSE                         | 3.898011    |
| hsa-miR-802_st        | 4.153572          | 0.3818098                   | FALSE                         | 4.305092          | 0.2077166                   | FALSE                         | 4.229332    |
| hsa-miR-873_st        | 3.785975          | 0.8847164                   | FALSE                         | 3.828043          | 0.8497                      | FALSE                         | 3.807009    |
| hsa-miR-874_st        | 5.963933          | 0.07955744                  | FALSE                         | 5.881582          | 0.09030714                  | FALSE                         | 5.9227575   |
| hsa-miR-875-3p_st     | 4.198941          | 0.1884007                   | FALSE                         | 3.911893          | 0.3700442                   | FALSE                         | 4.055417    |
| hsa-miR-875-5p_st     | 3.709593          | 0.922632                    | FALSE                         | 4.015528          | 0.5260491                   | FALSE                         | 3.8625605   |
| hsa-miR-876-3p_st     | 3.890883          | 0.9045135                   | FALSE                         | 3.786877          | 0.8041504                   | FALSE                         | 3.83888     |
| hsa-miR-876-5p_st     | 3.748373          | 0.9140697                   | FALSE                         | 3.996855          | 0.6383556                   | FALSE                         | 3.872614    |
| hsa-miR-877_st        | 6.247721          | 0.00154855                  | TRUE                          | 6.13884           | 0.002226933                 | TRUE                          | 6.1932805   |
| hsa-miR-877-star_st   | 3.88987           | 0.6391857                   | FALSE                         | 4.303388          | 0.4608909                   | FALSE                         | 4.096629    |
| hsa-miR-885-3p_st     | 6.155805          | 0.002493656                 | TRUE                          | 6.677706          | 0.000801268                 | TRUE                          | 6.4167555   |
| hsa-miR-885-5p_st     | 5.454425          | 0.004333878                 | TRUE                          | 4.432704          | 0.153047                    | FALSE                         | 4.9435645   |
| hsa-miR-886-3p_st     | 10.58867          | 5.08E-07                    | TRUE                          | 10.93109          | 2.05E-08                    | TRUE                          | 10.75988    |
| hsa-miR-886-5p_st     | 10.62171          | 3.95E-06                    | TRUE                          | 10.71346          | 5.02E-07                    | TRUE                          | 10.667585   |
| hsa-miR-887_st        | 5.117541          | 0.1450408                   | FALSE                         | 5.487192          | 0.1631682                   | FALSE                         | 5.3023665   |
| hsa-miR-888_st        | 3.722581          | 0.9803475                   | FALSE                         | 3.928366          | 0.7873548                   | FALSE                         | 3.8254735   |
| hsa-miR-888-star_st   | 3.88987           | 0.7624832                   | FALSE                         | 4.071829          | 0.3633923                   | FALSE                         | 3.9808495   |
| hsa-miR-889_st        | 3.928509          | 0.4067622                   | FALSE                         | 4.06952           | 0.2911307                   | FALSE                         | 3.9990145   |
| hsa-miR-890_st        | 4.034314          | 0.5348458                   | FALSE                         | 4.336214          | 0.1956646                   | FALSE                         | 4.185264    |
| hsa-miR-891a_st       | 4.085426          | 0.5276688                   | FALSE                         | 4.039991          | 0.26259                     | FALSE                         | 4.0627085   |
| hsa-miR-891b_st       | 3.887656          | 0.4311051                   | FALSE                         | 3.813871          | 0.9052343                   | FALSE                         | 3.8507635   |
| hsa-miR-892a_st       | 3.837274          | 0.7944276                   | FALSE                         | 3.849442          | 0.9159077                   | FALSE                         | 3.843358    |
| hsa-miR-892b_st       | 3.555408          | 0.9366919                   | FALSE                         | 3.719685          | 0.9324513                   | FALSE                         | 3.6375465   |
| hsa-miR-9_st          | 3.941875          | 0.3752613                   | FALSE                         | 3.815495          | 0.4330827                   | FALSE                         | 3.878685    |
| hsa-miR-920_st        | 4.172246          | 0.4024919                   | FALSE                         | 4.021329          | 0.4819054                   | FALSE                         | 4.0967875   |
| hsa-miR-921_st        | 4.36731           | 0.3095008                   | FALSE                         | 4.185671          | 0.4862677                   | FALSE                         | 4.2764905   |
| hsa-miR-922_st        | 3.490981          | 0.8169681                   | FALSE                         | 3.936748          | 0.7023157                   | FALSE                         | 3.7138645   |
| hsa-miR-923_st        | 9.935972          | 2.05E-08                    | TRUE                          | 10.18631          | 2.05E-08                    | TRUE                          | 10.061141   |
| hsa-miR-924_st        | 3.883108          | 0.7957023                   | FALSE                         | 3.769799          | 0.9125836                   | FALSE                         | 3.8264535   |
| hsa-miR-92a_st        | 13.31682          | 2.05E-08                    | TRUE                          | 13.44341          | 2.05E-08                    | TRUE                          | 13.380115   |
| hsa-miR-92a-1-star_st | 9.135947          | 3.48E-06                    | TRUE                          | 9.416792          | 3.54E-07                    | TRUE                          | 9.2763695   |
| hsa-miR-92a-2-star_st | 3.994089          | 0.6065331                   | FALSE                         | 3.990263          | 0.4496844                   | FALSE                         | 3.992176    |

| ProbeSet Name       | Hey cell Signal_1 | p-value (Hey cell Signal_1) | Detection (Hey cell Signal_1) | Hey cell Signal_2 | p-value (Hey cell Signal_2) | Detection (Hey cell Signal_2) | Mean signal |
|---------------------|-------------------|-----------------------------|-------------------------------|-------------------|-----------------------------|-------------------------------|-------------|
| hsa-miR-92b_st      | 8.489407          | 0.000711255                 | TRUE                          | 8.523087          | 0.000575051                 | TRUE                          | 8.506247    |
| hsa-miR-92b-star_st | 7.430676          | 0.01134661                  | TRUE                          | 7.490614          | 0.008905658                 | TRUE                          | 7.460645    |
| hsa-miR-93_st       | 12.19179          | 2.05E-08                    | TRUE                          | 12.34337          | 2.05E-08                    | TRUE                          | 12.26758    |
| hsa-miR-933_st      | 5.643908          | 0.03975105                  | TRUE                          | 5.717902          | 0.03563017                  | TRUE                          | 5.680905    |
| hsa-miR-934_st      | 3.856082          | 0.5217686                   | FALSE                         | 4.063932          | 0.459712                    | FALSE                         | 3.960007    |
| hsa-miR-935_st      | 5.351268          | 0.07054949                  | FALSE                         | 5.084011          | 0.118783                    | FALSE                         | 5.2176395   |
| hsa-miR-936_st      | 6.736971          | 0.000233301                 | TRUE                          | 7.129507          | 0.000152061                 | TRUE                          | 6.933239    |
| hsa-miR-937_st      | 4.177038          | 0.5935757                   | FALSE                         | 4.043628          | 0.6594062                   | FALSE                         | 4.110333    |
| hsa-miR-938_st      | 4.711708          | 0.09940834                  | FALSE                         | 4.125199          | 0.3905774                   | FALSE                         | 4.4184535   |
| hsa-miR-939_st      | 5.816607          | 0.08231006                  | FALSE                         | 5.65814           | 0.08369344                  | FALSE                         | 5.7373735   |
| hsa-miR-93-star_st  | 6.140809          | 0.002503207                 | TRUE                          | 6.621677          | 0.001100055                 | TRUE                          | 6.381243    |
| hsa-miR-940_st      | 4.471837          | 0.2970239                   | FALSE                         | 3.761409          | 0.6055794                   | FALSE                         | 4.116623    |
| hsa-miR-941_st      | 5.778267          | 0.04449993                  | TRUE                          | 6.350277          | 0.01818575                  | TRUE                          | 6.064272    |
| hsa-miR-942_st      | 4.01647           | 0.5115468                   | FALSE                         | 3.864563          | 0.9050276                   | FALSE                         | 3.9405165   |
| hsa-miR-943_st      | 4.895525          | 0.03832408                  | TRUE                          | 4.442006          | 0.1590342                   | FALSE                         | 4.6687655   |
| hsa-miR-944_st      | 4.631762          | 0.1099908                   | FALSE                         | 4.506423          | 0.1482886                   | FALSE                         | 4.5690925   |
| hsa-miR-95_st       | 3.748559          | 0.818207                    | FALSE                         | 4.056669          | 0.3357451                   | FALSE                         | 3.902614    |
| hsa-miR-96_st       | 4.767233          | 0.04596073                  | TRUE                          | 4.694583          | 0.05749543                  | TRUE                          | 4.730908    |
| hsa-miR-96-star_st  | 4.33795           | 0.3723719                   | FALSE                         | 3.971281          | 0.8105023                   | FALSE                         | 4.1546155   |
| hsa-miR-98_st       | 5.675147          | 3.35E-05                    | TRUE                          | 5.642511          | 0.000145532                 | TRUE                          | 5.658829    |
| hsa-miR-99a_st      | 11.62423          | 2.05E-08                    | TRUE                          | 11.19659          | 2.05E-08                    | TRUE                          | 11.41041    |
| hsa-miR-99a-star_st | 3.870248          | 0.6101778                   | FALSE                         | 4.104395          | 0.4835711                   | FALSE                         | 3.9873215   |
| hsa-miR-99b_st      | 10.83678          | 3.54E-07                    | TRUE                          | 11.04576          | 2.47E-07                    | TRUE                          | 10.94127    |
| hsa-miR-99b-star_st | 7.039983          | 0.004568201                 | TRUE                          | 7.140141          | 0.004288437                 | TRUE                          | 7.090062    |
| hsa-miR-9-star_st   | 4.29178           | 0.2544417                   | FALSE                         | 3.996081          | 0.5070534                   | FALSE                         | 4.1439305   |

**Supplementary Table 6. miRNA target enrichment analysis among up-regulated genes following miR-7 transfection.** Genomica enrichment (FDR <0.05) of miRNA targets among significantly up-regulated genes following miR-7 transfection into HEY cells. Regulating miRNAs are predicted using miRanda (those with the prefix John04 or SloanKettering), TargetScan or PicTar. Only “up” genes, i.e. up-regulated in the transfection, are analyzed (‘Set’). The other columns show the p-value of enrichment, the number of probesets in our dataset that are up-regulated and present in Genomica database (‘Set Size’), compared to the number of probesets in each set in the background Affymetrix chip (‘Total Size’). If a probeset is a predicted target of a miRNA then it is considered a ‘hit’ (‘Set Hits’ and ‘Total Hits’). The percentages calculated from raw numbers of genes that belong in each set are also shown.

| <b>Set</b> | <b>Enriched Set</b> | <b>Enriched Value</b> | <b>P-value</b> | <b>Set Hits</b> | <b>Set Size</b> | <b>Set Hits (%)</b> | <b>Total Hits</b> | <b>Total Size</b> | <b>Total Hits (%)</b> |
|------------|---------------------|-----------------------|----------------|-----------------|-----------------|---------------------|-------------------|-------------------|-----------------------|
| Up         | Pictar_hsa-miR-199b | 1                     | 4.12E-05       | 11              | 174             | 6.33                | 613               | 43407             | 1.42                  |
| Up         | Pictar_hsa-miR-199a | 1                     | 3.60E-06       | 11              | 174             | 6.33                | 471               | 43407             | 1.09                  |

**Supplementary Table 7. Hub genes and their targets affected by miR-7 in HEY cells.**

GeneGo was used to analyze the most significant interactions within the set of differentially expressed genes following miR-7 transfection. The analysis gives a list of “hub” genes interacting with other differentially expressed genes (i.e. nodes) which suggests that miRNAs are regulating the node genes indirectly through regulating the hubs. “IDs in active dataset” refer to the Probeset IDs in the dataset that passed the GeneGo FDR threshold of 5% and are acting as hubs. Corresponding gene names/symbols are given in “Object name” column. “IDs of corresponding network object from GeneGo network” refer to probeset IDs of objects in the dataset that the hubs are interacting with in GeneGo networks. The names of these nodes are given in the last column. If a hub gene is found to regulate another gene which may also act as a hub then the row is shaded. Genes that are predicted to be miR-7 targets by miRanda or may act as transcription factors are marked with ‘x’.

| <b>IDs in active data set</b> | <b>Object name</b>             | <b>miR-7 tgts_miRanda</b> | <b>Transcription Factor</b> | <b>IDs of corresponding network object from GeneGo network</b> | <b>Corresponding network object name</b> |
|-------------------------------|--------------------------------|---------------------------|-----------------------------|----------------------------------------------------------------|------------------------------------------|
| 201783_s_at;<br>230202_at     | RelA (p65<br>NF-kB<br>subunit) | x                         | x                           | 1555938_x_at                                                   | Vimentin                                 |
| 201783_s_at;<br>230202_at     | RelA (p65<br>NF-kB<br>subunit) | x                         | x                           | 1564907_s_at;<br>242260_at                                     | Matrin-3                                 |
| 201783_s_at;<br>230202_at     | RelA (p65<br>NF-kB<br>subunit) | x                         | x                           | 1568574_x_at;<br>209875_s_at                                   | Osteopontin                              |
| 201783_s_at;<br>230202_at     | RelA (p65<br>NF-kB<br>subunit) | x                         | x                           | 1569788_at                                                     | SIAT8A                                   |
| 201783_s_at;<br>230202_at     | RelA (p65<br>NF-kB<br>subunit) | x                         | x                           | 200690_at                                                      | GRP75                                    |
| 201783_s_at;<br>230202_at     | RelA (p65<br>NF-kB<br>subunit) | x                         | x                           | 201042_at                                                      | TGM2                                     |

| <b>IDs in active data set</b> | <b>Object name</b>       | <b>miR-7 tgts_miRanda</b> | <b>Transcription Factor</b> | <b>IDs of corresponding network object from GeneGo network</b>                          | <b>Corresponding network object name</b> |
|-------------------------------|--------------------------|---------------------------|-----------------------------|-----------------------------------------------------------------------------------------|------------------------------------------|
| 201783_s_at;<br>230202_at     | RelA (p65 NF-kB subunit) | x                         | x                           | 201244_s_at                                                                             | c-Raf-1                                  |
| 201783_s_at;<br>230202_at     | RelA (p65 NF-kB subunit) | x                         | x                           | 202443_x_at;<br>212377_s_at                                                             | NOTCH2 (2ICD)                            |
| 201783_s_at;<br>230202_at     | RelA (p65 NF-kB subunit) | x                         | x                           | 202847_at                                                                               | PPCKM                                    |
| 201783_s_at;<br>230202_at     | RelA (p65 NF-kB subunit) | x                         | x                           | 202859_x_at;<br>211506_s_at                                                             | IL-8                                     |
| 201783_s_at;<br>230202_at     | RelA (p65 NF-kB subunit) | x                         | x                           | 202886_s_at                                                                             | PPP2R1B                                  |
| 201783_s_at;<br>230202_at     | RelA (p65 NF-kB subunit) | x                         | x                           | 203220_s_at;<br>203222_s_at                                                             | TLE1                                     |
| 201783_s_at;<br>230202_at     | RelA (p65 NF-kB subunit) | x                         | x                           | 204296_at                                                                               | DCTN1(p150Glued)                         |
| 201783_s_at;<br>230202_at     | RelA (p65 NF-kB subunit) | x                         | x                           | 204470_at                                                                               | GRO-1                                    |
| 201783_s_at;<br>230202_at     | RelA (p65 NF-kB subunit) | x                         | x                           | 204799_at                                                                               | Y637                                     |
| 201783_s_at;<br>230202_at     | RelA (p65 NF-kB subunit) | x                         | x                           | 205067_at;<br>39402_at                                                                  | IL-1 beta                                |
| 201783_s_at;<br>230202_at     | RelA (p65 NF-kB subunit) | x                         | x                           | 205289_at                                                                               | BMP2                                     |
| 201783_s_at;<br>230202_at     | RelA (p65 NF-kB subunit) | x                         | x                           | 205416_s_at                                                                             | MJD (ataxin-3)                           |
| 201783_s_at;<br>230202_at     | RelA (p65 NF-kB subunit) | x                         | x                           | 205798_at                                                                               | IL7RA                                    |
| 201783_s_at;<br>230202_at     | RelA (p65 NF-kB subunit) | x                         | x                           | 207196_s_at                                                                             | TNIP1                                    |
| 201783_s_at;<br>230202_at     | RelA (p65 NF-kB subunit) | x                         | x                           | 207563_s_at;<br>207564_x_at;<br>209240_at;<br>212307_s_at;<br>220594_at;<br>229787_s_at | OGT (GlcNAc transferase)                 |

| <b>IDs in active data set</b> | <b>Object name</b>       | <b>miR-7 tgts_miRanda</b> | <b>Transcription Factor</b> | <b>IDs of corresponding network object from GeneGo network</b> | <b>Corresponding network object name</b> |
|-------------------------------|--------------------------|---------------------------|-----------------------------|----------------------------------------------------------------|------------------------------------------|
| 201783_s_at;<br>230202_at     | RelA (p65 NF-kB subunit) | x                         | x                           | 209383_at                                                      | C/EBP zeta                               |
| 201783_s_at;<br>230202_at     | RelA (p65 NF-kB subunit) | x                         | x                           | 209774_x_at                                                    | GRO-2                                    |
| 201783_s_at;<br>230202_at     | RelA (p65 NF-kB subunit) | x                         | x                           | 209946_at                                                      | VEGF-C                                   |
| 201783_s_at;<br>230202_at     | RelA (p65 NF-kB subunit) | x                         | x                           | 210385_s_at;<br>212580_at                                      | ARTS-1                                   |
| 201783_s_at;<br>230202_at     | RelA (p65 NF-kB subunit) | x                         | x                           | 211434_s_at                                                    | CCRL2                                    |
| 201783_s_at;<br>230202_at     | RelA (p65 NF-kB subunit) | x                         | x                           | 212188_at                                                      | KCTD12                                   |
| 201783_s_at;<br>230202_at     | RelA (p65 NF-kB subunit) | x                         | x                           | 214528_s_at                                                    | PAX8                                     |
| 201783_s_at;<br>230202_at     | RelA (p65 NF-kB subunit) | x                         | x                           | 215485_s_at                                                    | ICAM1                                    |
| 201783_s_at;<br>230202_at     | RelA (p65 NF-kB subunit) | x                         | x                           | 217996_at                                                      | PHLDA1                                   |
| 201783_s_at;<br>230202_at     | RelA (p65 NF-kB subunit) | x                         | x                           | 220266_s_at;<br>221841_s_at                                    | KLF4                                     |
| 201783_s_at;<br>230202_at     | RelA (p65 NF-kB subunit) | x                         | x                           | 221477_s_at                                                    | SOD2                                     |
| 201783_s_at;<br>230202_at     | RelA (p65 NF-kB subunit) | x                         | x                           | 223217_s_at                                                    | IKBZ                                     |
| 201783_s_at;<br>230202_at     | RelA (p65 NF-kB subunit) | x                         | x                           | 224654_at                                                      | DDX21                                    |
| 201783_s_at;<br>230202_at     | RelA (p65 NF-kB subunit) | x                         | x                           | 224917_at                                                      | microRNA 21                              |
| 201783_s_at;<br>230202_at     | RelA (p65 NF-kB subunit) | x                         | x                           | 227143_s_at                                                    | Bid                                      |
| 201783_s_at;<br>230202_at     | RelA (p65 NF-kB subunit) | x                         | x                           | 228363_at;<br>235222_x_at                                      | XIAP                                     |

| <b>IDs in active data set</b> | <b>Object name</b>       | <b>miR-7 tgts_miRanda</b> | <b>Transcription Factor</b> | <b>IDs of corresponding network object from GeneGo network</b> | <b>Corresponding network object name</b> |
|-------------------------------|--------------------------|---------------------------|-----------------------------|----------------------------------------------------------------|------------------------------------------|
| 201783_s_at;<br>230202_at     | RelA (p65 NF-kB subunit) | x                         | x                           | 235020_at                                                      | TAF4B                                    |
| 201783_s_at;<br>230202_at     | RelA (p65 NF-kB subunit) | x                         | x                           | 235795_at                                                      | PAX6                                     |
| 201783_s_at;<br>230202_at     | RelA (p65 NF-kB subunit) | x                         | x                           | 240221_at                                                      | Casein kinase I alpha                    |
| 202827_s_at                   | MMP-14                   |                           |                             | 201010_s_at                                                    | TXNIP (VDUP1)                            |
| 202827_s_at                   | MMP-14                   |                           |                             | 201042_at                                                      | TGM2                                     |
| 202827_s_at                   | MMP-14                   |                           |                             | 201147_s_at;<br>201149_s_at;<br>201150_s_at                    | TIMP3                                    |
| 202827_s_at                   | MMP-14                   |                           |                             | 201646_at;<br>201647_s_at;<br>224983_at                        | CD36L2                                   |
| 202827_s_at                   | MMP-14                   |                           |                             | 201920_at;<br>230494_at                                        | GLVR1                                    |
| 202827_s_at                   | MMP-14                   |                           |                             | 202007_at                                                      | Nidogen                                  |
| 202827_s_at                   | MMP-14                   |                           |                             | 202267_at                                                      | LAMC2                                    |
| 202827_s_at                   | MMP-14                   |                           |                             | 202443_x_at;<br>212377_s_at                                    | NOTCH2                                   |
| 202827_s_at                   | MMP-14                   |                           |                             | 202620_s_at                                                    | PLOD2                                    |
| 202827_s_at                   | MMP-14                   |                           |                             | 202859_x_at;<br>211506_s_at                                    | IL-8                                     |
| 202827_s_at                   | MMP-14                   |                           |                             | 203821_at;<br>38037_at                                         | HB-EGF                                   |
| 202827_s_at                   | MMP-14                   |                           |                             | 203888_at                                                      | Thrombomodulin                           |
| 202827_s_at                   | MMP-14                   |                           |                             | 205227_at                                                      | IL1RAP                                   |
| 202827_s_at                   | MMP-14                   |                           |                             | 207332_s_at;<br>208691_at                                      | TfR1                                     |
| 202827_s_at                   | MMP-14                   |                           |                             | 209281_s_at                                                    | PMCA1                                    |

| <b>IDs in active data set</b> | <b>Object name</b> | <b>miR-7 tgts_miRanda</b> | <b>Transcription Factor</b> | <b>IDs of corresponding network object from GeneGo network</b> | <b>Corresponding network object name</b> |
|-------------------------------|--------------------|---------------------------|-----------------------------|----------------------------------------------------------------|------------------------------------------|
| 202827_s_at                   | MMP-14             |                           |                             | 210495_x_at;<br>211719_x_at;<br>212464_s_at;<br>216442_x_at    | Fibronectin                              |
| 202827_s_at                   | MMP-14             |                           |                             | 211607_x_at                                                    | EGFR                                     |
| 202827_s_at                   | MMP-14             |                           |                             | 212097_at                                                      | Caveolin-1                               |
| 202827_s_at                   | MMP-14             |                           |                             | 212761_at                                                      | TCF7L2 (TCF4)                            |
| 202827_s_at                   | MMP-14             |                           |                             | 224953_at                                                      | YIPF5                                    |
| 202827_s_at                   | MMP-14             |                           |                             | 226217_at                                                      | ZnT7                                     |
| 202827_s_at                   | MMP-14             |                           |                             | 226545_at;<br>229900_at                                        | CD109                                    |
| 202827_s_at                   | MMP-14             |                           |                             | 232231_at                                                      | RUNX2                                    |
| 202827_s_at                   | MMP-14             |                           |                             | 239627_at                                                      | TMED9                                    |
| 202827_s_at                   | MMP-14             |                           |                             | 34478_at                                                       | Rab-11B                                  |
| 206011_at                     | Caspase-1          | x                         |                             | 1554479_a_at;<br>204950_at                                     | CARD8                                    |
| 206011_at                     | Caspase-1          | x                         |                             | 1555938_x_at                                                   | Vimentin                                 |
| 206011_at                     | Caspase-1          | x                         |                             | 1556607_at;<br>209536_s_at;<br>233660_at                       | EHD4                                     |
| 206011_at                     | Caspase-1          | x                         |                             | 1564907_s_at;<br>242260_at                                     | Matrin-3                                 |
| 206011_at                     | Caspase-1          | x                         |                             | 200681_at                                                      | Glyoxalase I                             |
| 206011_at                     | Caspase-1          | x                         |                             | 200755_s_at;<br>200756_x_at;<br>200757_s_at;<br>214845_s_at    | Calumenin                                |
| 206011_at                     | Caspase-1          | x                         |                             | 203555_at                                                      | PTPN18                                   |
| 206011_at                     | Caspase-1          | x                         |                             | 205067_at;<br>39402_at                                         | IL-1 beta                                |



| <b>IDs in active data set</b> | <b>Object name</b> | <b>miR-7 tgts_miRanda</b> | <b>Transcription Factor</b> | <b>IDs of corresponding network object from GeneGo network</b> | <b>Corresponding network object name</b> |
|-------------------------------|--------------------|---------------------------|-----------------------------|----------------------------------------------------------------|------------------------------------------|
| 206011_at                     | Caspase-1          | x                         |                             | 205416_s_at                                                    | MJD (ataxin-3)                           |
| 206011_at                     | Caspase-1          | x                         |                             | 208374_s_at                                                    | CAPZA1                                   |
| 206011_at                     | Caspase-1          | x                         |                             | 209615_s_at;<br>226507_at                                      | PAK1                                     |
| 206011_at                     | Caspase-1          | x                         |                             | 209822_s_at                                                    | VLDLR                                    |
| 206011_at                     | Caspase-1          | x                         |                             | 214291_at                                                      | RPL17                                    |
| 206011_at                     | Caspase-1          | x                         |                             | 218850_s_at                                                    | LIMD1                                    |
| 206011_at                     | Caspase-1          | x                         |                             | 222519_s_at                                                    | HIPPI                                    |
| 209037_s_at                   | EHD1               | x                         |                             | 1556607_at;<br>209536_s_at;<br>233660_at                       | EHD4                                     |
| 209037_s_at                   | EHD1               | x                         |                             | 201783_s_at;<br>230202_at                                      | RelA (p65 NF-kB subunit)                 |
| 209037_s_at                   | EHD1               | x                         |                             | 222597_at                                                      | SNAP-29                                  |
| 209037_s_at                   | EHD1               | x                         |                             | 226581_at                                                      | Rabenosyn-5                              |
| 209037_s_at                   | EHD1               | x                         |                             | 227428_at                                                      | GABP alpha                               |
| 209112_at                     | p27KIP1            |                           |                             | 200952_s_at                                                    | Cyclin D2                                |
| 209112_at                     | p27KIP1            |                           |                             | 201549_x_at;<br>211202_s_at                                    | PLU-1                                    |
| 209112_at                     | p27KIP1            |                           |                             | 201783_s_at;<br>230202_at                                      | RelA (p65 NF-kB subunit)                 |
| 209112_at                     | p27KIP1            |                           |                             | 203358_s_at                                                    | EZH2                                     |
| 209112_at                     | p27KIP1            |                           |                             | 204254_s_at                                                    | VDR                                      |
| 209112_at                     | p27KIP1            |                           |                             | 204872_at                                                      | TLE4                                     |
| 209112_at                     | p27KIP1            |                           |                             | 205899_at                                                      | Cyclin A1                                |

| <b>IDs in active data set</b> | <b>Object name</b> | <b>miR-7 tgts_miRanda</b> | <b>Transcription Factor</b> | <b>IDs of corresponding network object from GeneGo network</b> | <b>Corresponding network object name</b> |
|-------------------------------|--------------------|---------------------------|-----------------------------|----------------------------------------------------------------|------------------------------------------|
| 209112_at                     | p27KIP1            |                           |                             | 210743_s_at                                                    | CDC14a                                   |
| 209112_at                     | p27KIP1            |                           |                             | 211716_x_at                                                    | RhoGDI alpha                             |
| 209112_at                     | p27KIP1            |                           |                             | 212265_at;<br>212636_at;<br>214541_s_at                        | QKI                                      |
| 209112_at                     | p27KIP1            |                           |                             | 220266_s_at;<br>221841_s_at                                    | KLF4                                     |
| 209112_at                     | p27KIP1            |                           |                             | 224851_at                                                      | CDK6                                     |
| 209112_at                     | p27KIP1            |                           |                             | 225984_at                                                      | AMPK alpha 1 subunit                     |
| 209112_at                     | p27KIP1            |                           |                             | 232466_at                                                      | Cullin 4A                                |
| 209822_s_at                   | VLDLR              |                           |                             | 201042_at                                                      | TGM2                                     |
| 209822_s_at                   | VLDLR              |                           |                             | 201109_s_at                                                    | Thrombospondin 1                         |
| 209822_s_at                   | VLDLR              |                           |                             | 209676_at;<br>213258_at                                        | TFPI                                     |
| 209822_s_at                   | VLDLR              |                           |                             | 223130_s_at                                                    | MIR (Idol)                               |
| 211607_x_at                   | EGFR               | x                         |                             | 1564907_s_at;<br>242260_at                                     | Matrin-3                                 |
| 211607_x_at                   | EGFR               | x                         |                             | 200690_at                                                      | GRP75                                    |
| 211607_x_at                   | EGFR               | x                         |                             | 200998_s_at;<br>200999_s_at                                    | CLIMP-63                                 |
| 211607_x_at                   | EGFR               | x                         |                             | 201096_s_at                                                    | ARF4                                     |
| 211607_x_at                   | EGFR               | x                         |                             | 201244_s_at                                                    | c-Raf-1                                  |
| 211607_x_at                   | EGFR               | x                         |                             | 202267_at                                                      | LAMC2                                    |
| 211607_x_at                   | EGFR               | x                         |                             | 203821_at;<br>38037_at                                         | HB-EGF                                   |
| 211607_x_at                   | EGFR               | x                         |                             | 204011_at                                                      | SPRY2                                    |

| <b>IDs in active data set</b> | <b>Object name</b> | <b>miR-7 tgts_miRanda</b> | <b>Transcription Factor</b> | <b>IDs of corresponding network object from GeneGo network</b> | <b>Corresponding network object name</b> |
|-------------------------------|--------------------|---------------------------|-----------------------------|----------------------------------------------------------------|------------------------------------------|
| 211607_x_at                   | EGFR               | x                         |                             | 204254_s_at                                                    | VDR                                      |
| 211607_x_at                   | EGFR               | x                         |                             | 204686_at                                                      | IRS-1                                    |
| 211607_x_at                   | EGFR               | x                         |                             | 205016_at;<br>211258_s_at                                      | TGF-alpha                                |
| 211607_x_at                   | EGFR               | x                         |                             | 205447_s_at                                                    | ZPK(MAP3K12)                             |
| 211607_x_at                   | EGFR               | x                         |                             | 206011_at                                                      | Caspase-1                                |
| 211607_x_at                   | EGFR               | x                         |                             | 208958_at                                                      | ERp44                                    |
| 211607_x_at                   | EGFR               | x                         |                             | 209409_at                                                      | GRB10                                    |
| 211607_x_at                   | EGFR               | x                         |                             | 209615_s_at;<br>226507_at                                      | PAK1                                     |
| 211607_x_at                   | EGFR               | x                         |                             | 210495_x_at;<br>211719_x_at;<br>212464_s_at;<br>216442_x_at    | Fibronectin                              |
| 211607_x_at                   | EGFR               | x                         |                             | 210517_s_at                                                    | AKAP12                                   |
| 211607_x_at                   | EGFR               | x                         |                             | 211063_s_at                                                    | NCK1                                     |
| 211607_x_at                   | EGFR               | x                         |                             | 212097_at                                                      | Caveolin-1                               |
| 211607_x_at                   | EGFR               | x                         |                             | 212761_at                                                      | TCF7L2 (TCF4)                            |
| 211607_x_at                   | EGFR               | x                         |                             | 212870_at                                                      | SOS2                                     |
| 211607_x_at                   | EGFR               | x                         |                             | 213070_at                                                      | PI3K class II (CII-alpha)                |
| 211607_x_at                   | EGFR               | x                         |                             | 215485_s_at                                                    | ICAM1                                    |
| 211607_x_at                   | EGFR               | x                         |                             | 216971_s_at                                                    | Plectin 1                                |
| 211607_x_at                   | EGFR               | x                         |                             | 218310_at                                                      | RABGEF1                                  |
| 211607_x_at                   | EGFR               | x                         |                             | 224657_at                                                      | MIG6                                     |

| <b>IDs in active data set</b> | <b>Object name</b> | <b>miR-7 tgts_miRanda</b> | <b>Transcription Factor</b> | <b>IDs of corresponding network object from GeneGo network</b> | <b>Corresponding network object name</b> |
|-------------------------------|--------------------|---------------------------|-----------------------------|----------------------------------------------------------------|------------------------------------------|
| 211607_x_at                   | EGFR               | x                         |                             | 224844_at                                                      | SLAIN2                                   |
| 211607_x_at                   | EGFR               | x                         |                             | 224938_at                                                      | NUFIP2                                   |
| 211607_x_at                   | EGFR               | x                         |                             | 225231_at;<br>243475_at                                        | c-Cbl                                    |
| 211607_x_at                   | EGFR               | x                         |                             | 226572_at                                                      | SOCS7                                    |
| 211607_x_at                   | EGFR               | x                         |                             | 226934_at                                                      | CPSF6                                    |
| 211607_x_at                   | EGFR               | x                         |                             | 234932_s_at                                                    | CDCP1                                    |
| 211607_x_at                   | EGFR               | x                         |                             | 235057_at                                                      | Itch                                     |
| 211607_x_at                   | EGFR               | x                         |                             | 238855_at                                                      | AHNAK                                    |
| 211607_x_at                   | EGFR               | x                         |                             | 241755_at                                                      | UQCRC2                                   |
| 212761_at                     | TCF7L2 (TCF4)      |                           | x                           | 1552721_a_at;<br>205117_at;<br>208240_s_at                     | FGF1                                     |
| 212761_at                     | TCF7L2 (TCF4)      |                           | x                           | 1555938_x_at                                                   | Vimentin                                 |
| 212761_at                     | TCF7L2 (TCF4)      |                           | x                           | 1568574_x_at;<br>209875_s_at                                   | Osteopontin                              |
| 212761_at                     | TCF7L2 (TCF4)      |                           | x                           | 200794_x_at                                                    | DAZAP2                                   |
| 212761_at                     | TCF7L2 (TCF4)      |                           | x                           | 200952_s_at                                                    | Cyclin D2                                |
| 212761_at                     | TCF7L2 (TCF4)      |                           | x                           | 202859_x_at;<br>211506_s_at                                    | IL-8                                     |
| 212761_at                     | TCF7L2 (TCF4)      |                           | x                           | 204254_s_at                                                    | VDR                                      |
| 212761_at                     | TCF7L2 (TCF4)      |                           | x                           | 205168_at;<br>225442_at;<br>227561_at                          | DDR2                                     |
| 212761_at                     | TCF7L2 (TCF4)      |                           | x                           | 209383_at                                                      | C/EBP zeta                               |
| 212761_at                     | TCF7L2 (TCF4)      |                           | x                           | 210172_at                                                      | ZNF162                                   |

| <b>IDs in active data set</b> | <b>Object name</b> | <b>miR-7 tgts_miRanda</b> | <b>Transcription Factor</b> | <b>IDs of corresponding network object from GeneGo network</b> | <b>Corresponding network object name</b> |
|-------------------------------|--------------------|---------------------------|-----------------------------|----------------------------------------------------------------|------------------------------------------|
| 212761_at                     | TCF7L2 (TCF4)      |                           | x                           | 210255_at                                                      | RAD51B                                   |
| 212761_at                     | TCF7L2 (TCF4)      |                           | x                           | 211527_x_at                                                    | VEGF-A                                   |
| 212761_at                     | TCF7L2 (TCF4)      |                           | x                           | 220266_s_at;<br>221841_s_at                                    | KLF4                                     |
| 212761_at                     | TCF7L2 (TCF4)      |                           | x                           | 222449_at                                                      | PMEPA1                                   |
| 212761_at                     | TCF7L2 (TCF4)      |                           | x                           | 224851_at                                                      | CDK6                                     |
| 212761_at                     | TCF7L2 (TCF4)      |                           | x                           | 224994_at;<br>225019_at                                        | CaMK II delta                            |
| 212761_at                     | TCF7L2 (TCF4)      |                           | x                           | 228938_at                                                      | Myelin basic protein                     |
| 212761_at                     | TCF7L2 (TCF4)      |                           | x                           | 232231_at                                                      | RUNX2                                    |
| 212761_at                     | TCF7L2 (TCF4)      |                           | x                           | 235795_at                                                      | PAX6                                     |
| 215245_x_at                   | FMR1               |                           |                             | 1567213_at;<br>1567214_a_at;<br>212037_at                      | Pinin                                    |
| 215245_x_at                   | FMR1               |                           |                             | 202920_at;<br>202921_s_at                                      | Ankyrin-B                                |
| 215245_x_at                   | FMR1               |                           |                             | 209615_s_at;<br>226507_at                                      | PAK1                                     |
| 215245_x_at                   | FMR1               |                           |                             | 220099_s_at                                                    | LUC7L2                                   |
| 215245_x_at                   | FMR1               |                           |                             | 220563_s_at                                                    | SHANK1                                   |
| 215245_x_at                   | FMR1               |                           |                             | 222576_s_at                                                    | eIF2C1 (Argonaute-1)                     |
| 215245_x_at                   | FMR1               |                           |                             | 222956_at                                                      | Fidgetin                                 |
| 215245_x_at                   | FMR1               |                           |                             | 224662_at                                                      | KIF5B                                    |
| 215245_x_at                   | FMR1               |                           |                             | 224938_at                                                      | NUFIP2                                   |
| 215245_x_at                   | FMR1               |                           |                             | 225984_at                                                      | AMPK alpha 1 subunit                     |

| <b>IDs in active data set</b> | <b>Object name</b> | <b>miR-7 tgts_miRanda</b> | <b>Transcription Factor</b> | <b>IDs of corresponding network object from GeneGo network</b> | <b>Corresponding network object name</b> |
|-------------------------------|--------------------|---------------------------|-----------------------------|----------------------------------------------------------------|------------------------------------------|
| 215245_x_at                   | FMR1               |                           |                             | 228938_at                                                      | Myelin basic protein                     |
| 215245_x_at                   | FMR1               |                           |                             | 235057_at                                                      | Itch                                     |
| 227025_at                     | PPHLN1             |                           |                             | 1555938_x_at                                                   | Vimentin                                 |
| 227025_at                     | PPHLN1             |                           |                             | 201042_at                                                      | TGM2                                     |
| 227025_at                     | PPHLN1             |                           |                             | 206011_at                                                      | Caspase-1                                |
| 227025_at                     | PPHLN1             |                           |                             | 237833_s_at                                                    | Synphilin 1                              |

**Supplementary Table 8. Hub genes and their targets affected by miR-128 in HEY cells.**

GeneGo was used to analyze the most significant interactions within the set of differentially expressed genes following miR-128 transfection. The analysis gives a list of “hub” genes interacting with other differentially expressed genes (i.e. nodes) which suggests that miRNAs are regulating the node genes indirectly through regulating the hubs. “IDs in active dataset” refer to the probeset IDs in the dataset that passed the GeneGo FDR threshold of 5% and are acting as hubs. Corresponding gene names/symbols are given in “object name” column. “IDs of corresponding network object from GeneGo network” refer to probeset IDs of objects in the dataset that the hubs are interacting with in GeneGo networks. The names of these nodes are given in the last column. If a hub gene is found to regulate another gene which may also act as a hub then the row is shaded. Genes that are predicted to be miR-128 targets by miRanda or may act as transcription factors are marked with ‘x’.

| <b>IDs in active data set</b>                                                              | <b>Object name</b> | <b>miR-128 tgts_miRanda</b> | <b>Transcription Factor</b> | <b>IDs of corresponding network object from GeneGo network</b> | <b>Corresponding network object name</b> |
|--------------------------------------------------------------------------------------------|--------------------|-----------------------------|-----------------------------|----------------------------------------------------------------|------------------------------------------|
| 1552703_s_at;<br>206011_at;<br>209970_x_at;<br>211366_x_at;<br>211367_s_at;<br>211368_s_at | Caspase-1          | x                           |                             | 1552701_a_at;<br>1552703_s_at                                  | Pseudo-ICE                               |
| 1552703_s_at;<br>206011_at;<br>209970_x_at;<br>211366_x_at;<br>211367_s_at;<br>211368_s_at | Caspase-1          | x                           |                             | 1554091_a_at                                                   | TIRAP (Mal)                              |
| 1552703_s_at;<br>206011_at;<br>209970_x_at;<br>211366_x_at;<br>211367_s_at;<br>211368_s_at | Caspase-1          | x                           |                             | 1554479_a_at;<br>204950_at                                     | CARD8                                    |

| <b>IDs in active data set</b>                                                              | <b>Object name</b> | <b>miR-128 tgts_miRanda</b> | <b>Transcription Factor</b> | <b>IDs of corresponding network object from GeneGo network</b> | <b>Corresponding network object name</b> |
|--------------------------------------------------------------------------------------------|--------------------|-----------------------------|-----------------------------|----------------------------------------------------------------|------------------------------------------|
| 1552703_s_at;<br>206011_at;<br>209970_x_at;<br>211366_x_at;<br>211367_s_at;<br>211368_s_at | Caspase-1          | x                           |                             | 1552701_a_at;<br>1552703_s_at                                  | Pseudo-ICE                               |
| 1552703_s_at;<br>206011_at;<br>209970_x_at;<br>211366_x_at;<br>211367_s_at;<br>211368_s_at | Caspase-1          | x                           |                             | 1555543_a_at;<br>207855_s_at                                   | CLCC1                                    |
| 1552703_s_at;<br>206011_at;<br>209970_x_at;<br>211366_x_at;<br>211367_s_at;<br>211368_s_at | Caspase-1          | x                           |                             | 1559893_at;<br>228495_at                                       | CCDC75                                   |
| 1552703_s_at;<br>206011_at;<br>209970_x_at;<br>211366_x_at;<br>211367_s_at;<br>211368_s_at | Caspase-1          | x                           |                             | 1567014_s_at;<br>1567015_at                                    | NRF2                                     |
| 1552703_s_at;<br>206011_at;<br>209970_x_at;<br>211366_x_at;<br>211367_s_at;<br>211368_s_at | Caspase-1          | x                           |                             | 1570507_at                                                     | SFRS2IP                                  |
| 1552703_s_at;<br>206011_at;<br>209970_x_at;<br>211366_x_at;<br>211367_s_at;<br>211368_s_at | Caspase-1          | x                           |                             | 201841_s_at                                                    | HSP27                                    |
| 1552703_s_at;<br>206011_at;<br>209970_x_at;<br>211366_x_at;<br>211367_s_at;<br>211368_s_at | Caspase-1          | x                           |                             | 203275_at                                                      | IRF2                                     |
| 1552703_s_at;<br>206011_at;<br>209970_x_at;                                                | Caspase-1          | x                           |                             | 205067_at;<br>39402_at                                         | IL-1 beta                                |



| <b>IDs in active data set</b>                                                              | <b>Object name</b> | <b>miR-128 tgts_miRanda</b> | <b>Transcription Factor</b> | <b>IDs of corresponding network object from GeneGo network</b> | <b>Corresponding network object name</b> |
|--------------------------------------------------------------------------------------------|--------------------|-----------------------------|-----------------------------|----------------------------------------------------------------|------------------------------------------|
| 1552703_s_at;<br>206011_at;<br>209970_x_at;<br>211366_x_at;<br>211367_s_at;<br>211368_s_at | Caspase-1          | x                           |                             | 1552701_a_at;<br>1552703_s_at                                  | Pseudo-ICE                               |
| 211366_x_at;<br>211367_s_at;<br>211368_s_at                                                |                    |                             |                             |                                                                |                                          |
| 1552703_s_at;<br>206011_at;<br>209970_x_at;<br>211366_x_at;<br>211367_s_at;<br>211368_s_at | Caspase-1          | x                           |                             | 205415_s_at                                                    | MJD (ataxin-3)                           |
| 1552703_s_at;<br>206011_at;<br>209970_x_at;<br>211366_x_at;<br>211367_s_at;<br>211368_s_at | Caspase-1          | x                           |                             | 205425_at                                                      | HIP1                                     |
| 1552703_s_at;<br>206011_at;<br>209970_x_at;<br>211366_x_at;<br>211367_s_at;<br>211368_s_at | Caspase-1          | x                           |                             | 205996_s_at;<br>212173_at;<br>212174_at;<br>212175_s_at        | AK2                                      |
| 1552703_s_at;<br>206011_at;<br>209970_x_at;<br>211366_x_at;<br>211367_s_at;<br>211368_s_at | Caspase-1          | x                           |                             | 207181_s_at                                                    | Caspase-7                                |
| 1552703_s_at;<br>206011_at;<br>209970_x_at;<br>211366_x_at;<br>211367_s_at;<br>211368_s_at | Caspase-1          | x                           |                             | 208374_s_at                                                    | CAPZA1                                   |
| 1552703_s_at;<br>206011_at;<br>209970_x_at;<br>211366_x_at;<br>211367_s_at;<br>211368_s_at | Caspase-1          | x                           |                             | 209615_s_at                                                    | PAK1                                     |

| <b>IDs in active data set</b>                                                              | <b>Object name</b> | <b>miR-128 tgts_miRanda</b> | <b>Transcription Factor</b> | <b>IDs of corresponding network object from GeneGo network</b> | <b>Corresponding network object name</b> |
|--------------------------------------------------------------------------------------------|--------------------|-----------------------------|-----------------------------|----------------------------------------------------------------|------------------------------------------|
| 1552703_s_at;<br>206011_at;<br>209970_x_at;<br>211366_x_at;<br>211367_s_at;<br>211368_s_at | Caspase-1          | x                           |                             | 1552701_a_at;<br>1552703_s_at                                  | Pseudo-ICE                               |
| 1552703_s_at;<br>206011_at;<br>209970_x_at;<br>211366_x_at;<br>211367_s_at;<br>211368_s_at | Caspase-1          | x                           |                             | 209822_s_at                                                    | VLDLR                                    |
| 1552703_s_at;<br>206011_at;<br>209970_x_at;<br>211366_x_at;<br>211367_s_at;<br>211368_s_at | Caspase-1          | x                           |                             | 210113_s_at                                                    | CARD7                                    |
| 1552703_s_at;<br>206011_at;<br>209970_x_at;<br>211366_x_at;<br>211367_s_at;<br>211368_s_at | Caspase-1          | x                           |                             | 210145_at                                                      | PA24A                                    |
| 1552703_s_at;<br>206011_at;<br>209970_x_at;<br>211366_x_at;<br>211367_s_at;<br>211368_s_at | Caspase-1          | x                           |                             | 211995_x_at;<br>212988_x_at                                    | Actin cytoplasmic 2                      |
| 1552703_s_at;<br>206011_at;<br>209970_x_at;<br>211366_x_at;<br>211367_s_at;<br>211368_s_at | Caspase-1          | x                           |                             | 213012_at                                                      | NEDD4                                    |
| 1552703_s_at;<br>206011_at;<br>209970_x_at;<br>211366_x_at;<br>211367_s_at;<br>211368_s_at | Caspase-1          | x                           |                             | 213596_at                                                      | Caspase-4                                |
| 1552703_s_at;<br>206011_at;<br>209970_x_at;                                                | Caspase-1          | x                           |                             | 214291_at                                                      | RPL17                                    |

| <b>IDs in active data set</b>                                                              | <b>Object name</b> | <b>miR-128 tgts_miRanda</b> | <b>Transcription Factor</b> | <b>IDs of corresponding network object from GeneGo network</b> | <b>Corresponding network object name</b> |
|--------------------------------------------------------------------------------------------|--------------------|-----------------------------|-----------------------------|----------------------------------------------------------------|------------------------------------------|
| 1552703_s_at;<br>206011_at;<br>209970_x_at;<br>211366_x_at;<br>211367_s_at;<br>211368_s_at | Caspase-1          | x                           |                             | 1552701_a_at;<br>1552703_s_at                                  | Pseudo-ICE                               |
| 211366_x_at;<br>211367_s_at;<br>211368_s_at                                                |                    |                             |                             |                                                                |                                          |
| 1552703_s_at;<br>206011_at;<br>209970_x_at;<br>211366_x_at;<br>211367_s_at;<br>211368_s_at | Caspase-1          | x                           |                             | 216632_at                                                      | NAV3                                     |
| 1552703_s_at;<br>206011_at;<br>209970_x_at;<br>211366_x_at;<br>211367_s_at;<br>211368_s_at | Caspase-1          | x                           |                             | 218943_s_at                                                    | RIG-I                                    |
| 1552703_s_at;<br>206011_at;<br>209970_x_at;<br>211366_x_at;<br>211367_s_at;<br>211368_s_at | Caspase-1          | x                           |                             | 222036_s_at;<br>222037_at                                      | MCM4                                     |
| 1552703_s_at;<br>206011_at;<br>209970_x_at;<br>211366_x_at;<br>211367_s_at;<br>211368_s_at | Caspase-1          | x                           |                             | 224782_at                                                      | ZMAT2                                    |
| 1552703_s_at;<br>206011_at;<br>209970_x_at;<br>211366_x_at;<br>211367_s_at;<br>211368_s_at | Caspase-1          | x                           |                             | 225386_s_at                                                    | SRRF                                     |
| 1552703_s_at;<br>206011_at;<br>209970_x_at;<br>211366_x_at;<br>211367_s_at;<br>211368_s_at | Caspase-1          | x                           |                             | 238034_at                                                      | Calnexin                                 |

| <b>IDs in active data set</b>                                                              | <b>Object name</b> | <b>miR-128 tgts_miRanda</b> | <b>Transcription Factor</b> | <b>IDs of corresponding network object from GeneGo network</b> | <b>Corresponding network object name</b> |
|--------------------------------------------------------------------------------------------|--------------------|-----------------------------|-----------------------------|----------------------------------------------------------------|------------------------------------------|
| 1552703_s_at;<br>206011_at;<br>209970_x_at;<br>211366_x_at;<br>211367_s_at;<br>211368_s_at | Caspase-1          | x                           |                             | 1552701_a_at;<br>1552703_s_at                                  | Pseudo-ICE                               |
| 1552703_s_at;<br>206011_at;<br>209970_x_at;<br>211366_x_at;<br>211367_s_at;<br>211368_s_at | Caspase-1          | x                           |                             | 242260_at                                                      | Matrin-3                                 |
| 1554168_a_at;<br>223082_at;<br>235692_at                                                   | CIN85              |                             |                             | 1554086_at                                                     | TUBGCP3                                  |
| 1554168_a_at;<br>223082_at;<br>235692_at                                                   | CIN85              |                             |                             | 201896_s_at                                                    | DDA3                                     |
| 1554168_a_at;<br>223082_at;<br>235692_at                                                   | CIN85              |                             |                             | 204318_s_at                                                    | GTSE1                                    |
| 1554168_a_at;<br>223082_at;<br>235692_at                                                   | CIN85              |                             |                             | 208151_x_at;<br>208719_s_at;<br>213998_s_at                    | DDX17                                    |
| 1554168_a_at;<br>223082_at;<br>235692_at                                                   | CIN85              |                             |                             | 208374_s_at                                                    | CAPZA1                                   |
| 1554168_a_at;<br>223082_at;<br>235692_at                                                   | CIN85              |                             |                             | 208865_at;<br>208866_at;<br>208867_s_at                        | Casein kinase I alpha                    |
| 1554168_a_at;<br>223082_at;<br>235692_at                                                   | CIN85              |                             |                             | 208877_at;<br>208878_s_at                                      | PAK2                                     |
| 1554168_a_at;<br>223082_at;<br>235692_at                                                   | CIN85              |                             |                             | 209682_at                                                      | CBL-B                                    |
| 1554168_a_at;<br>223082_at;<br>235692_at                                                   | CIN85              |                             |                             | 210612_s_at                                                    | SYNJ2                                    |
| 1554168_a_at;<br>223082_at;<br>235692_at                                                   | CIN85              |                             |                             | 210684_s_at                                                    | PSD-95                                   |
| 1554168_a_at;<br>223082_at;<br>235692_at                                                   | CIN85              |                             |                             | 213012_at                                                      | NEDD4                                    |

| <b>IDs in active data set</b>                                                              | <b>Object name</b> | <b>miR-128 tgts_miRanda</b> | <b>Transcription Factor</b> | <b>IDs of corresponding network object from GeneGo network</b>                             | <b>Corresponding network object name</b> |
|--------------------------------------------------------------------------------------------|--------------------|-----------------------------|-----------------------------|--------------------------------------------------------------------------------------------|------------------------------------------|
| 1552703_s_at;<br>206011_at;<br>209970_x_at;<br>211366_x_at;<br>211367_s_at;<br>211368_s_at | Caspase-1          | x                           |                             | 1552701_a_at;<br>1552703_s_at                                                              | Pseudo-ICE                               |
| 1554168_a_at;<br>223082_at;<br>235692_at                                                   | CIN85              |                             |                             | 213649_at                                                                                  | SFRS7 (9G8)                              |
| 1554168_a_at;<br>223082_at;<br>235692_at                                                   | CIN85              |                             |                             | 213976_at                                                                                  | CIZ1                                     |
| 1554168_a_at;<br>223082_at;<br>235692_at                                                   | CIN85              |                             |                             | 215606_s_at                                                                                | ELKS                                     |
| 1554168_a_at;<br>223082_at;<br>235692_at                                                   | CIN85              |                             |                             | 222077_s_at                                                                                | RacGAP1                                  |
| 1554168_a_at;<br>223082_at;<br>235692_at                                                   | CIN85              |                             |                             | 223208_at;<br>226518_at                                                                    | KCTD10                                   |
| 1554168_a_at;<br>223082_at;<br>235692_at                                                   | CIN85              |                             |                             | 225186_at;<br>225188_at                                                                    | Lpd                                      |
| 1554168_a_at;<br>223082_at;<br>235692_at                                                   | CIN85              |                             |                             | 225521_at                                                                                  | ANAPC7                                   |
| 1554168_a_at;<br>223082_at;<br>235692_at                                                   | CIN85              |                             |                             | 226020_s_at                                                                                | DAB1                                     |
| 1554168_a_at;<br>223082_at;<br>235692_at                                                   | CIN85              |                             |                             | 235430_at                                                                                  | C14orf43                                 |
| 1554168_a_at;<br>223082_at;<br>235692_at                                                   | CIN85              |                             |                             | 239651_at                                                                                  | ANAPC5                                   |
| 1565483_at                                                                                 | EGFR               |                             |                             | 1552703_s_at;<br>206011_at;<br>209970_x_at;<br>211366_x_at;<br>211367_s_at;<br>211368_s_at | Caspase-1                                |
| 1565483_at                                                                                 | EGFR               |                             |                             | 1554168_a_at;<br>223082_at;<br>235692_at                                                   | CIN85                                    |

| <b>IDs in active data set</b>                                                              | <b>Object name</b> | <b>miR-128 tgts_miRanda</b> | <b>Transcription Factor</b> | <b>IDs of corresponding network object from GeneGo network</b> | <b>Corresponding network object name</b> |
|--------------------------------------------------------------------------------------------|--------------------|-----------------------------|-----------------------------|----------------------------------------------------------------|------------------------------------------|
| 1552703_s_at;<br>206011_at;<br>209970_x_at;<br>211366_x_at;<br>211367_s_at;<br>211368_s_at | Caspase-1          | x                           |                             | 1552701_a_at;<br>1552703_s_at                                  | Pseudo-ICE                               |
| 1565483_at                                                                                 | EGFR               |                             |                             | 1554679_a_at;<br>208029_s_at;<br>208767_s_at                   | LAPTM4B                                  |
| 1565483_at                                                                                 | EGFR               |                             |                             | 1557719_at                                                     | PIP5KIII                                 |
| 1565483_at                                                                                 | EGFR               |                             |                             | 1558199_at                                                     | Fibronectin                              |
| 1565483_at                                                                                 | EGFR               |                             |                             | 1558532_at                                                     | Tropomyosin-1                            |
| 1565483_at                                                                                 | EGFR               |                             |                             | 1567014_s_at;<br>1567015_at                                    | NRF2                                     |
| 1565483_at                                                                                 | EGFR               |                             |                             | 1568765_at;<br>202627_s_at;<br>202628_s_at                     | PAI1                                     |
| 1565483_at                                                                                 | EGFR               |                             |                             | 1569385_s_at                                                   | TET2                                     |
| 1565483_at                                                                                 | EGFR               |                             |                             | 200021_at                                                      | Cofilin, non-muscle                      |
| 1565483_at                                                                                 | EGFR               |                             |                             | 200726_at                                                      | PP1-cat gamma                            |
| 1565483_at                                                                                 | EGFR               |                             |                             | 200824_at                                                      | GSTP1                                    |
| 1565483_at                                                                                 | EGFR               |                             |                             | 200894_s_at;<br>200895_s_at                                    | FKBP4                                    |
| 1565483_at                                                                                 | EGFR               |                             |                             | 201087_at;<br>211823_s_at                                      | Paxillin                                 |
| 1565483_at                                                                                 | EGFR               |                             |                             | 201373_at;<br>216971_s_at                                      | Plectin 1                                |
| 1565483_at                                                                                 | EGFR               |                             |                             | 201693_s_at;<br>201694_s_at;<br>227404_s_at                    | EGR1                                     |
| 1565483_at                                                                                 | EGFR               |                             |                             | 201840_at                                                      | NEDD8                                    |
| 1565483_at                                                                                 | EGFR               |                             |                             | 201841_s_at                                                    | HSP27                                    |
| 1565483_at                                                                                 | EGFR               |                             |                             | 202267_at;<br>207517_at                                        | LAMC2                                    |
| 1565483_at                                                                                 | EGFR               |                             |                             | 202637_s_at;<br>202638_s_at;<br>215485_s_at                    | ICAM1                                    |
| 1565483_at                                                                                 | EGFR               |                             |                             | 202670_at                                                      | MEK1(MAP2K1)                             |
| 1565483_at                                                                                 | EGFR               |                             |                             | 202677_at                                                      | p120GAP                                  |
| 1565483_at                                                                                 | EGFR               |                             |                             | 203010_at                                                      | STAT5A                                   |
| 1565483_at                                                                                 | EGFR               |                             |                             | 203065_s_at;<br>212097_at                                      | Caveolin-1                               |
| 1565483_at                                                                                 | EGFR               |                             |                             | 203276_at                                                      | Lamin B1                                 |
| 1565483_at                                                                                 | EGFR               |                             |                             | 203373_at                                                      | SOCS2                                    |
| 1565483_at                                                                                 | EGFR               |                             |                             | 203431_s_at                                                    | p200RhoGAP                               |

| <b>IDs in active data set</b>                                                              | <b>Object name</b> | <b>miR-128 tgts_miRanda</b> | <b>Transcription Factor</b> | <b>IDs of corresponding network object from GeneGo network</b>        | <b>Corresponding network object name</b> |
|--------------------------------------------------------------------------------------------|--------------------|-----------------------------|-----------------------------|-----------------------------------------------------------------------|------------------------------------------|
| 1552703_s_at;<br>206011_at;<br>209970_x_at;<br>211366_x_at;<br>211367_s_at;<br>211368_s_at | Caspase-1          | x                           |                             | 1552701_a_at;<br>1552703_s_at                                         | Pseudo-ICE                               |
| 1565483_at                                                                                 | EGFR               |                             |                             | 203688_at                                                             | Polycystin 2                             |
| 1565483_at                                                                                 | EGFR               |                             |                             | 204254_s_at;<br>204255_s_at;<br>213692_s_at                           | VDR                                      |
| 1565483_at                                                                                 | EGFR               |                             |                             | 204620_s_at;<br>211571_s_at;<br>215646_s_at;<br>221731_x_at           | Versican                                 |
| 1565483_at                                                                                 | EGFR               |                             |                             | 204654_s_at                                                           | AP-2A                                    |
| 1565483_at                                                                                 | EGFR               |                             |                             | 205015_s_at;<br>211258_s_at                                           | TGF-alpha                                |
| 1565483_at                                                                                 | EGFR               |                             |                             | 205032_at;<br>227314_at                                               | ITGA2                                    |
| 1565483_at                                                                                 | EGFR               |                             |                             | 205192_at                                                             | NIK(MAP3K14)                             |
| 1565483_at                                                                                 | EGFR               |                             |                             | 205425_at                                                             | HIP1                                     |
| 1565483_at                                                                                 | EGFR               |                             |                             | 205447_s_at                                                           | ZPK(MAP3K12)                             |
| 1565483_at                                                                                 | EGFR               |                             |                             | 205645_at                                                             | REPS2                                    |
| 1565483_at                                                                                 | EGFR               |                             |                             | 205810_s_at                                                           | N-WASP                                   |
| 1565483_at                                                                                 | EGFR               |                             |                             | 206204_at                                                             | GRB14                                    |
| 1565483_at                                                                                 | EGFR               |                             |                             | 206348_s_at                                                           | PKD3                                     |
| 1565483_at                                                                                 | EGFR               |                             |                             | 206412_at                                                             | Fer                                      |
| 1565483_at                                                                                 | EGFR               |                             |                             | 206846_s_at                                                           | HDAC6                                    |
| 1565483_at                                                                                 | EGFR               |                             |                             | 207112_s_at;<br>225998_at                                             | GAB1                                     |
| 1565483_at                                                                                 | EGFR               |                             |                             | 207181_s_at                                                           | Caspase-7                                |
| 1565483_at                                                                                 | EGFR               |                             |                             | 208062_s_at                                                           | Neuregulin 2                             |
| 1565483_at                                                                                 | EGFR               |                             |                             | 208194_s_at;<br>209649_at;<br>215044_s_at;<br>228254_at;<br>242569_at | STAM2                                    |
| 1565483_at                                                                                 | EGFR               |                             |                             | 208546_x_at                                                           | H2BFQ                                    |
| 1565483_at                                                                                 | EGFR               |                             |                             | 208553_at                                                             | HIST1H1E                                 |
| 1565483_at                                                                                 | EGFR               |                             |                             | 208812_x_at;<br>214459_x_at                                           | HLA-Cw3                                  |
| 1565483_at                                                                                 | EGFR               |                             |                             | 208832_at;<br>208833_s_at                                             | Ataxin-10                                |
| 1565483_at                                                                                 | EGFR               |                             |                             | 208977_x_at;<br>213726_x_at                                           | Tubulin beta 2C                          |

| <b>IDs in active data set</b>                                                              | <b>Object name</b> | <b>miR-128 tgts_miRanda</b> | <b>Transcription Factor</b> | <b>IDs of corresponding network object from GeneGo network</b> | <b>Corresponding network object name</b>      |
|--------------------------------------------------------------------------------------------|--------------------|-----------------------------|-----------------------------|----------------------------------------------------------------|-----------------------------------------------|
| 1552703_s_at;<br>206011_at;<br>209970_x_at;<br>211366_x_at;<br>211367_s_at;<br>211368_s_at | Caspase-1          | x                           |                             | 1552701_a_at;<br>1552703_s_at                                  | Pseudo-ICE                                    |
| 1565483_at                                                                                 | EGFR               |                             |                             | 208991_at;<br>208992_s_at;<br>225289_at                        | STAT3                                         |
| 1565483_at                                                                                 | EGFR               |                             |                             | 209251_x_at;<br>211750_x_at                                    | Tubulin alpha-1C                              |
| 1565483_at                                                                                 | EGFR               |                             |                             | 209332_s_at                                                    | Max                                           |
| 1565483_at                                                                                 | EGFR               |                             |                             | 209615_s_at                                                    | PAK1                                          |
| 1565483_at                                                                                 | EGFR               |                             |                             | 209633_at                                                      | PPP2R3A                                       |
| 1565483_at                                                                                 | EGFR               |                             |                             | 209648_x_at                                                    | SOCS5                                         |
| 1565483_at                                                                                 | EGFR               |                             |                             | 209682_at                                                      | CBL-B                                         |
| 1565483_at                                                                                 | EGFR               |                             |                             | 210173_at;<br>214137_at;<br>227396_at                          | DEP-1                                         |
| 1565483_at                                                                                 | EGFR               |                             |                             | 210449_x_at;<br>211561_x_at                                    | p38alpha (MAPK14)                             |
| 1565483_at                                                                                 | EGFR               |                             |                             | 211596_s_at                                                    | LIG-1                                         |
| 1565483_at                                                                                 | EGFR               |                             |                             | 211928_at                                                      | Dynein 1,<br>cytoplasmic, heavy<br>chain      |
| 1565483_at                                                                                 | EGFR               |                             |                             | 211986_at                                                      | AHNAK                                         |
| 1565483_at                                                                                 | EGFR               |                             |                             | 212073_at                                                      | Casein kinase II,<br>alpha chain<br>(CSNK2A1) |
| 1565483_at                                                                                 | EGFR               |                             |                             | 212100_s_at;<br>215357_s_at                                    | PDIP46                                        |
| 1565483_at                                                                                 | EGFR               |                             |                             | 212362_at                                                      | Ca-ATPase2                                    |
| 1565483_at                                                                                 | EGFR               |                             |                             | 212426_s_at                                                    | 14-3-3 theta                                  |
| 1565483_at                                                                                 | EGFR               |                             |                             | 212549_at                                                      | STAT5B                                        |
| 1565483_at                                                                                 | EGFR               |                             |                             | 213003_s_at                                                    | C/EBPdelta                                    |
| 1565483_at                                                                                 | EGFR               |                             |                             | 213070_at                                                      | PI3K class II (CII-<br>alpha)                 |
| 1565483_at                                                                                 | EGFR               |                             |                             | 213324_at                                                      | c-Src                                         |
| 1565483_at                                                                                 | EGFR               |                             |                             | 214015_at;<br>226572_at;<br>228662_at                          | SOCS7                                         |
| 1565483_at                                                                                 | EGFR               |                             |                             | 214132_at                                                      | ATP5C                                         |
| 1565483_at                                                                                 | EGFR               |                             |                             | 214744_s_at                                                    | RPL23                                         |
| 1565483_at                                                                                 | EGFR               |                             |                             | 216990_at;<br>230097_at;                                       | PUR2                                          |



| <b>IDs in active data set</b>                                                              | <b>Object name</b> | <b>miR-128 tgts_miRanda</b> | <b>Transcription Factor</b> | <b>IDs of corresponding network object from GeneGo network</b> | <b>Corresponding network object name</b> |
|--------------------------------------------------------------------------------------------|--------------------|-----------------------------|-----------------------------|----------------------------------------------------------------|------------------------------------------|
| 1552703_s_at;<br>206011_at;<br>209970_x_at;<br>211366_x_at;<br>211367_s_at;<br>211368_s_at | Caspase-1          | x                           |                             | 1552701_a_at;<br>1552703_s_at                                  | Pseudo-ICE                               |
|                                                                                            |                    |                             |                             | 244822_at                                                      |                                          |
| 1565483_at                                                                                 | EGFR               |                             |                             | 223679_at                                                      | Beta-catenin                             |
| 1565483_at                                                                                 | EGFR               |                             |                             | 224221_s_at                                                    | VAV-3                                    |
| 1565483_at                                                                                 | EGFR               |                             |                             | 224853_at;<br>224854_s_at                                      | SLAIN2                                   |
| 1565483_at                                                                                 | EGFR               |                             |                             | 225396_at;<br>237333_at;<br>244872_at                          | RBBP4 (RbAp48)                           |
| 1565483_at                                                                                 | EGFR               |                             |                             | 226404_at                                                      | CAPER                                    |
| 1565483_at                                                                                 | EGFR               |                             |                             | 226408_at                                                      | TEF-4                                    |
| 1565483_at                                                                                 | EGFR               |                             |                             | 226713_at;<br>228693_at;<br>235051_at;<br>236831_at            | YMER                                     |
| 1565483_at                                                                                 | EGFR               |                             |                             | 227394_at                                                      | NCAM1                                    |
| 1565483_at                                                                                 | EGFR               |                             |                             | 227625_s_at                                                    | CHIP                                     |
| 1565483_at                                                                                 | EGFR               |                             |                             | 227997_at                                                      | IL17RD                                   |
| 1565483_at                                                                                 | EGFR               |                             |                             | 228353_x_at;<br>238462_at                                      | Sts-1                                    |
| 1565483_at                                                                                 | EGFR               |                             |                             | 229141_at;<br>243832_at                                        | WDR33                                    |
| 1565483_at                                                                                 | EGFR               |                             |                             | 232505_at                                                      | DCTN2                                    |
| 1565483_at                                                                                 | EGFR               |                             |                             | 237856_at                                                      | Rap1GDS1                                 |
| 1565483_at                                                                                 | EGFR               |                             |                             | 238759_at                                                      | Girdin                                   |
| 1565483_at                                                                                 | EGFR               |                             |                             | 242260_at                                                      | Matrin-3                                 |
| 1565483_at                                                                                 | EGFR               |                             |                             | 242482_at                                                      | PRKAR1A                                  |
| 200711_s_at;<br>200719_at                                                                  | SKP1               | x                           |                             | 200726_at                                                      | PP1-cat gamma                            |
| 200711_s_at;<br>200719_at                                                                  | SKP1               | x                           |                             | 201316_at                                                      | PSMA2                                    |
| 200711_s_at;<br>200719_at                                                                  | SKP1               | x                           |                             | 201502_s_at                                                    | NFKBIA                                   |
| 200711_s_at;<br>200719_at                                                                  | SKP1               | x                           |                             | 201693_s_at;<br>201694_s_at;<br>227404_s_at                    | EGR1                                     |
| 200711_s_at;<br>200719_at                                                                  | SKP1               | x                           |                             | 201897_s_at                                                    | CKS1                                     |
| 200711_s_at;<br>200719_at                                                                  | SKP1               | x                           |                             | 201908_at                                                      | DVL-3                                    |

| <b>IDs in active data set</b>                                                              | <b>Object name</b> | <b>miR-128 tgts_miRanda</b> | <b>Transcription Factor</b> | <b>IDs of corresponding network object from GeneGo network</b> | <b>Corresponding network object name</b> |
|--------------------------------------------------------------------------------------------|--------------------|-----------------------------|-----------------------------|----------------------------------------------------------------|------------------------------------------|
| 1552703_s_at;<br>206011_at;<br>209970_x_at;<br>211366_x_at;<br>211367_s_at;<br>211368_s_at | Caspase-1          | x                           |                             | 1552701_a_at;<br>1552703_s_at                                  | Pseudo-ICE                               |
| 200711_s_at;<br>200719_at                                                                  | SKP1               | x                           |                             | 204826_at                                                      | Cyclin F                                 |
| 200711_s_at;<br>200719_at                                                                  | SKP1               | x                           |                             | 208838_at;<br>208839_s_at                                      | TIP120A                                  |
| 200711_s_at;<br>200719_at                                                                  | SKP1               | x                           |                             | 208988_at;<br>208989_s_at                                      | FBXL11                                   |
| 200711_s_at;<br>200719_at                                                                  | SKP1               | x                           |                             | 209630_s_at                                                    | FBXW2                                    |
| 200711_s_at;<br>200719_at                                                                  | SKP1               | x                           |                             | 213359_at;<br>221480_at                                        | AUF1                                     |
| 200711_s_at;<br>200719_at                                                                  | SKP1               | x                           |                             | 218432_at;<br>229955_at                                        | Fbxo3                                    |
| 200711_s_at;<br>200719_at                                                                  | SKP1               | x                           |                             | 221436_s_at                                                    | Tome-1                                   |
| 200711_s_at;<br>200719_at                                                                  | SKP1               | x                           |                             | 225099_at;<br>242294_at                                        | FBXO45                                   |
| 200711_s_at;<br>200719_at                                                                  | SKP1               | x                           |                             | 225803_at;<br>241763_s_at                                      | MAFbx                                    |
| 200711_s_at;<br>200719_at                                                                  | SKP1               | x                           |                             | 241747_s_at                                                    | Cullin7                                  |
| 200726_at                                                                                  | PP1-cat<br>gamma   | x                           |                             | 1559044_at                                                     | CSL4                                     |
| 200726_at                                                                                  | PP1-cat<br>gamma   | x                           |                             | 1570352_at                                                     | ATM                                      |
| 200726_at                                                                                  | PP1-cat<br>gamma   | x                           |                             | 200021_at                                                      | Cofilin, non-muscle                      |
| 200726_at                                                                                  | PP1-cat<br>gamma   | x                           |                             | 201702_s_at                                                    | PNUTS                                    |
| 200726_at                                                                                  | PP1-cat<br>gamma   | x                           |                             | 202094_at;<br>202095_s_at                                      | Survivin                                 |
| 200726_at                                                                                  | PP1-cat<br>gamma   | x                           |                             | 204554_at                                                      | PPP1R3D                                  |
| 200726_at                                                                                  | PP1-cat<br>gamma   | x                           |                             | 204641_at;<br>211080_s_at                                      | Nek2A                                    |
| 200726_at                                                                                  | PP1-cat<br>gamma   | x                           |                             | 204839_at                                                      | POP5                                     |
| 200726_at                                                                                  | PP1-cat<br>gamma   | x                           |                             | 206665_s_at;<br>212312_at                                      | Bcl-XL                                   |
| 200726_at                                                                                  | PP1-cat            | x                           |                             | 209090_s_at                                                    | Endophilin B1                            |

| <b>IDs in active data set</b>                                                              | <b>Object name</b> | <b>miR-128 tgts_miRanda</b> | <b>Transcription Factor</b> | <b>IDs of corresponding network object from GeneGo network</b> | <b>Corresponding network object name</b> |
|--------------------------------------------------------------------------------------------|--------------------|-----------------------------|-----------------------------|----------------------------------------------------------------|------------------------------------------|
| 1552703_s_at;<br>206011_at;<br>209970_x_at;<br>211366_x_at;<br>211367_s_at;<br>211368_s_at | Caspase-1          | x                           |                             | 1552701_a_at;<br>1552703_s_at                                  | Pseudo-ICE                               |
|                                                                                            | gamma              |                             |                             |                                                                |                                          |
| 200726_at                                                                                  | PP1-cat<br>gamma   | x                           |                             | 209332_s_at                                                    | Max                                      |
| 200726_at                                                                                  | PP1-cat<br>gamma   | x                           |                             | 209339_at                                                      | SIAH2                                    |
| 200726_at                                                                                  | PP1-cat<br>gamma   | x                           |                             | 209482_at                                                      | RPP20                                    |
| 200726_at                                                                                  | PP1-cat<br>gamma   | x                           |                             | 212020_s_at;<br>212021_s_at;<br>212023_s_at                    | Antigen KI-67                            |
| 200726_at                                                                                  | PP1-cat<br>gamma   | x                           |                             | 215119_at                                                      | MYR8                                     |
| 200726_at                                                                                  | PP1-cat<br>gamma   | x                           |                             | 219235_s_at                                                    | Phactr4                                  |
| 200726_at                                                                                  | PP1-cat<br>gamma   | x                           |                             | 227696_at                                                      | MTR3                                     |
| 200726_at                                                                                  | PP1-cat<br>gamma   | x                           |                             | 231966_at                                                      | Neurabin-1                               |
| 200726_at                                                                                  | PP1-cat<br>gamma   | x                           |                             | 232097_at                                                      | TOX4                                     |
| 200732_s_at                                                                                | PTP4A1             |                             |                             | 201090_x_at;<br>212639_x_at;<br>213646_x_at                    | Tubulin alpha-1B                         |
| 200732_s_at                                                                                | PTP4A1             |                             |                             | 201693_s_at;<br>201694_s_at;<br>227404_s_at                    | EGR1                                     |
| 200732_s_at                                                                                | PTP4A1             |                             |                             | 206684_s_at;<br>228830_s_at;<br>235160_at;<br>244587_at        | ATF-7                                    |
| 200732_s_at                                                                                | PTP4A1             |                             |                             | 208296_x_at;<br>210260_s_at                                    | TNFAIP8                                  |
| 200732_s_at                                                                                | PTP4A1             |                             |                             | 208615_s_at                                                    | PTP4A2                                   |
| 200732_s_at                                                                                | PTP4A1             |                             |                             | 225565_at;<br>225572_at                                        | CREB1                                    |
| 200732_s_at                                                                                | PTP4A1             |                             |                             | 238487_at;<br>239068_at                                        | GNL1                                     |
| 200790_at                                                                                  | DCOR               |                             |                             | 201365_at                                                      | OAZ2                                     |
| 200790_at                                                                                  | DCOR               |                             |                             | 201467_s_at;                                                   | NQO1                                     |

| <b>IDs in active data set</b>                                                              | <b>Object name</b> | <b>miR-128 tgts_miRanda</b> | <b>Transcription Factor</b> | <b>IDs of corresponding network object from GeneGo network</b> | <b>Corresponding network object name</b>      |
|--------------------------------------------------------------------------------------------|--------------------|-----------------------------|-----------------------------|----------------------------------------------------------------|-----------------------------------------------|
| 1552703_s_at;<br>206011_at;<br>209970_x_at;<br>211366_x_at;<br>211367_s_at;<br>211368_s_at | Caspase-1          | x                           |                             | 1552701_a_at;<br>1552703_s_at                                  | Pseudo-ICE                                    |
|                                                                                            |                    |                             |                             | 201468_s_at;<br>210519_s_at                                    |                                               |
| 200790_at                                                                                  | DCOR               |                             |                             | 204109_s_at;<br>228433_at                                      | NFYA                                          |
| 200790_at                                                                                  | DCOR               |                             |                             | 204654_s_at                                                    | AP-2A                                         |
| 200790_at                                                                                  | DCOR               |                             |                             | 206877_at;<br>228846_at                                        | MAD                                           |
| 200790_at                                                                                  | DCOR               |                             |                             | 209332_s_at                                                    | Max                                           |
| 200790_at                                                                                  | DCOR               |                             |                             | 218284_at                                                      | SMAD3                                         |
| 200790_at                                                                                  | DCOR               |                             |                             | 220266_s_at                                                    | KLF4                                          |
| 200790_at                                                                                  | DCOR               |                             |                             | 230821_at                                                      | ZNF148                                        |
| 200894_s_at;<br>200895_s_at                                                                | FKBP4              |                             |                             | 204186_s_at;<br>228469_at                                      | Cyclophilin D                                 |
| 200894_s_at;<br>200895_s_at                                                                | FKBP4              |                             |                             | 204466_s_at;<br>207827_x_at;<br>211546_x_at                    | Alpha-synuclein                               |
| 200894_s_at;<br>200895_s_at                                                                | FKBP4              |                             |                             | 207181_s_at                                                    | Caspase-7                                     |
| 200894_s_at;<br>200895_s_at                                                                | FKBP4              |                             |                             | 212073_at                                                      | Casein kinase II,<br>alpha chain<br>(CSNK2A1) |
| 200894_s_at;<br>200895_s_at                                                                | FKBP4              |                             |                             | 213070_at                                                      | PI3K class II (CII-<br>alpha)                 |
| 200894_s_at;<br>200895_s_at                                                                | FKBP4              |                             |                             | 217728_at                                                      | Calcyclin                                     |
| 200894_s_at;<br>200895_s_at                                                                | FKBP4              |                             |                             | 219343_at;<br>228561_at                                        | CDC37L1                                       |
| 200894_s_at;<br>200895_s_at                                                                | FKBP4              |                             |                             | 226336_at                                                      | Cyclophilin A                                 |
| 200894_s_at;<br>200895_s_at                                                                | FKBP4              |                             |                             | 232505_at                                                      | DCTN2                                         |
| 200894_s_at;<br>200895_s_at                                                                | FKBP4              |                             |                             | 233748_x_at                                                    | AMPK gamma2                                   |
| 201087_at;<br>211823_s_at                                                                  | Paxillin           |                             |                             | 1555842_at                                                     | Cytohesin2                                    |
| 201087_at;<br>211823_s_at                                                                  | Paxillin           |                             |                             | 1555878_at                                                     | RPS24                                         |
| 201087_at;<br>211823_s_at                                                                  | Paxillin           |                             |                             | 1556499_s_at;<br>202310_s_at                                   | COL1A1                                        |

| <b>IDs in active data set</b>                                                              | <b>Object name</b> | <b>miR-128 tgts_miRanda</b> | <b>Transcription Factor</b> | <b>IDs of corresponding network object from GeneGo network</b> | <b>Corresponding network object name</b> |
|--------------------------------------------------------------------------------------------|--------------------|-----------------------------|-----------------------------|----------------------------------------------------------------|------------------------------------------|
| 1552703_s_at;<br>206011_at;<br>209970_x_at;<br>211366_x_at;<br>211367_s_at;<br>211368_s_at | Caspase-1          | x                           |                             | 1552701_a_at;<br>1552703_s_at                                  | Pseudo-ICE                               |
| 201087_at;<br>211823_s_at                                                                  | Paxillin           |                             |                             | 1558199_at                                                     | Fibronectin                              |
| 201087_at;<br>211823_s_at                                                                  | Paxillin           |                             |                             | 1558532_at                                                     | Tropomyosin-1                            |
| 201087_at;<br>211823_s_at                                                                  | Paxillin           |                             |                             | 1565717_s_at                                                   | LXR-alpha                                |
| 201087_at;<br>211823_s_at                                                                  | Paxillin           |                             |                             | 1567223_at;<br>1567224_at                                      | HMGA2                                    |
| 201087_at;<br>211823_s_at                                                                  | Paxillin           |                             |                             | 200072_s_at                                                    | hnRNP M                                  |
| 201087_at;<br>211823_s_at                                                                  | Paxillin           |                             |                             | 201042_at;<br>211003_x_at;<br>211573_x_at                      | TGM2                                     |
| 201087_at;<br>211823_s_at                                                                  | Paxillin           |                             |                             | 201714_at                                                      | Tubulin gamma 1                          |
| 201087_at;<br>211823_s_at                                                                  | Paxillin           |                             |                             | 202149_at;<br>202150_s_at                                      | CAS-L                                    |
| 201087_at;<br>211823_s_at                                                                  | Paxillin           |                             |                             | 202441_at;<br>202444_s_at                                      | SPFH1                                    |
| 201087_at;<br>211823_s_at                                                                  | Paxillin           |                             |                             | 202677_at                                                      | p120GAP                                  |
| 201087_at;<br>211823_s_at                                                                  | Paxillin           |                             |                             | 204626_s_at;<br>204627_s_at;<br>204628_s_at;<br>216261_at      | ITGB3                                    |
| 201087_at;<br>211823_s_at                                                                  | Paxillin           |                             |                             | 205369_x_at;<br>244687_at                                      | BCKD-E2                                  |
| 201087_at;<br>211823_s_at                                                                  | Paxillin           |                             |                             | 205645_at                                                      | REPS2                                    |
| 201087_at;<br>211823_s_at                                                                  | Paxillin           |                             |                             | 207112_s_at;<br>225998_at                                      | GAB1                                     |
| 201087_at;<br>211823_s_at                                                                  | Paxillin           |                             |                             | 208977_x_at;<br>213726_x_at                                    | Tubulin beta 2C                          |
| 201087_at;<br>211823_s_at                                                                  | Paxillin           |                             |                             | 209589_s_at                                                    | Ephrin-B receptor 2                      |
| 201087_at;<br>211823_s_at                                                                  | Paxillin           |                             |                             | 210173_at;<br>214137_at;<br>227396_at                          | DEP-1                                    |
| 201087_at;                                                                                 | Paxillin           |                             |                             | 210477_x_at;                                                   | JNK1(MAPK8)                              |

| <b>IDs in active data set</b>                                                              | <b>Object name</b> | <b>miR-128 tgts_miRanda</b> | <b>Transcription Factor</b> | <b>IDs of corresponding network object from GeneGo network</b> | <b>Corresponding network object name</b> |
|--------------------------------------------------------------------------------------------|--------------------|-----------------------------|-----------------------------|----------------------------------------------------------------|------------------------------------------|
| 1552703_s_at;<br>206011_at;<br>209970_x_at;<br>211366_x_at;<br>211367_s_at;<br>211368_s_at | Caspase-1          | x                           |                             | 1552701_a_at;<br>1552703_s_at                                  | Pseudo-ICE                               |
| 211823_s_at                                                                                |                    |                             |                             | 226048_at                                                      |                                          |
| 201087_at;<br>211823_s_at                                                                  | Paxillin           |                             |                             | 211711_s_at;<br>242622_x_at                                    | PTEN                                     |
| 201087_at;<br>211823_s_at                                                                  | Paxillin           |                             |                             | 211995_x_at;<br>212988_x_at                                    | Actin cytoplasmic 2                      |
| 201087_at;<br>211823_s_at                                                                  | Paxillin           |                             |                             | 212205_at;<br>212206_s_at                                      | H2AFV                                    |
| 201087_at;<br>211823_s_at                                                                  | Paxillin           |                             |                             | 212372_at;<br>213067_at                                        | MYH10                                    |
| 201087_at;<br>211823_s_at                                                                  | Paxillin           |                             |                             | 212426_s_at                                                    | 14-3-3 theta                             |
| 201087_at;<br>211823_s_at                                                                  | Paxillin           |                             |                             | 213746_s_at;<br>214752_x_at                                    | Filamin A                                |
| 201087_at;<br>211823_s_at                                                                  | Paxillin           |                             |                             | 214073_at                                                      | Cortactin                                |
| 201087_at;<br>211823_s_at                                                                  | Paxillin           |                             |                             | 214607_at                                                      | PAK3                                     |
| 201087_at;<br>211823_s_at                                                                  | Paxillin           |                             |                             | 214744_s_at                                                    | RPL23                                    |
| 201087_at;<br>211823_s_at                                                                  | Paxillin           |                             |                             | 221725_at;<br>224562_at;<br>224563_at                          | WASF2                                    |
| 201087_at;<br>211823_s_at                                                                  | Paxillin           |                             |                             | 235412_at                                                      | BETA-PIX                                 |
| 201090_x_at;<br>212639_x_at;<br>213646_x_at                                                | Tubulin alpha-1B   |                             |                             | 1565483_at                                                     | EGFR                                     |
| 201090_x_at;<br>212639_x_at;<br>213646_x_at                                                | Tubulin alpha-1B   |                             |                             | 200894_s_at;<br>200895_s_at                                    | FKBP4                                    |
| 201090_x_at;<br>212639_x_at;<br>213646_x_at                                                | Tubulin alpha-1B   |                             |                             | 201087_at;<br>211823_s_at                                      | Paxillin                                 |
| 201090_x_at;<br>212639_x_at;<br>213646_x_at                                                | Tubulin alpha-1B   |                             |                             | 201502_s_at                                                    | NFKBIA                                   |
| 201090_x_at;<br>212639_x_at;<br>213646_x_at                                                | Tubulin alpha-1B   |                             |                             | 201714_at                                                      | Tubulin gamma 1                          |

| <b>IDs in active data set</b>                                                              | <b>Object name</b> | <b>miR-128 tgts_miRanda</b> | <b>Transcription Factor</b> | <b>IDs of corresponding network object from GeneGo network</b> | <b>Corresponding network object name</b> |
|--------------------------------------------------------------------------------------------|--------------------|-----------------------------|-----------------------------|----------------------------------------------------------------|------------------------------------------|
| 1552703_s_at;<br>206011_at;<br>209970_x_at;<br>211366_x_at;<br>211367_s_at;<br>211368_s_at | Caspase-1          | x                           |                             | 1552701_a_at;<br>1552703_s_at                                  | Pseudo-ICE                               |
| 201090_x_at;<br>212639_x_at;<br>213646_x_at                                                | Tubulin alpha-1B   |                             |                             | 202154_x_at;<br>213476_x_at                                    | Tubulin beta 3                           |
| 201090_x_at;<br>212639_x_at;<br>213646_x_at                                                | Tubulin alpha-1B   |                             |                             | 203463_s_at                                                    | EPN2                                     |
| 201090_x_at;<br>212639_x_at;<br>213646_x_at                                                | Tubulin alpha-1B   |                             |                             | 204270_at                                                      | Ski                                      |
| 201090_x_at;<br>212639_x_at;<br>213646_x_at                                                | Tubulin alpha-1B   |                             |                             | 204466_s_at;<br>207827_x_at;<br>211546_x_at                    | Alpha-synuclein                          |
| 201090_x_at;<br>212639_x_at;<br>213646_x_at                                                | Tubulin alpha-1B   |                             |                             | 205647_at;<br>210630_s_at                                      | Rad52                                    |
| 201090_x_at;<br>212639_x_at;<br>213646_x_at                                                | Tubulin alpha-1B   |                             |                             | 206846_s_at                                                    | HDAC6                                    |
| 201090_x_at;<br>212639_x_at;<br>213646_x_at                                                | Tubulin alpha-1B   |                             |                             | 210282_at                                                      | ZNF198                                   |
| 201090_x_at;<br>212639_x_at;<br>213646_x_at                                                | Tubulin alpha-1B   |                             |                             | 210684_s_at                                                    | PSD-95                                   |
| 201090_x_at;<br>212639_x_at;<br>213646_x_at                                                | Tubulin alpha-1B   |                             |                             | 221264_s_at                                                    | TARDBP (TDP43)                           |
| 201090_x_at;<br>212639_x_at;<br>213646_x_at                                                | Tubulin alpha-1B   |                             |                             | 222077_s_at                                                    | RacGAP1                                  |
| 201090_x_at;<br>212639_x_at;<br>213646_x_at                                                | Tubulin alpha-1B   |                             |                             | 226563_at;<br>235598_at                                        | SMAD2                                    |
| 201502_s_at                                                                                | NFKBIA             |                             |                             | 201042_at;<br>211003_x_at;<br>211573_x_at                      | TGM2                                     |
| 201502_s_at                                                                                | NFKBIA             |                             |                             | 201316_at                                                      | PSMA2                                    |
| 201502_s_at                                                                                | NFKBIA             |                             |                             | 201792_at                                                      | AEBP1                                    |
| 201502_s_at                                                                                | NFKBIA             |                             |                             | 202491_s_at                                                    | IKAP                                     |

| <b>IDs in active data set</b>                                                              | <b>Object name</b> | <b>miR-128 tgts_miRanda</b> | <b>Transcription Factor</b> | <b>IDs of corresponding network object from GeneGo network</b>        | <b>Corresponding network object name</b>      |
|--------------------------------------------------------------------------------------------|--------------------|-----------------------------|-----------------------------|-----------------------------------------------------------------------|-----------------------------------------------|
| 1552703_s_at;<br>206011_at;<br>209970_x_at;<br>211366_x_at;<br>211367_s_at;<br>211368_s_at | Caspase-1          | x                           |                             | 1552701_a_at;<br>1552703_s_at                                         | Pseudo-ICE                                    |
| 201502_s_at                                                                                | NFKBIA             |                             |                             | 202672_s_at                                                           | ATF-3                                         |
| 201502_s_at                                                                                | NFKBIA             |                             |                             | 202762_at                                                             | ROCK2                                         |
| 201502_s_at                                                                                | NFKBIA             |                             |                             | 205192_at                                                             | NIK(MAP3K14)                                  |
| 201502_s_at                                                                                | NFKBIA             |                             |                             | 205415_s_at                                                           | MJD (ataxin-3)                                |
| 201502_s_at                                                                                | NFKBIA             |                             |                             | 205731_s_at;<br>205732_s_at                                           | NCOA2<br>(GRIP1/TIF2)                         |
| 201502_s_at                                                                                | NFKBIA             |                             |                             | 206967_at                                                             | Cyclin T1                                     |
| 201502_s_at                                                                                | NFKBIA             |                             |                             | 209341_s_at                                                           | IKK-beta                                      |
| 201502_s_at                                                                                | NFKBIA             |                             |                             | 210426_x_at;<br>210479_s_at;<br>226682_at;<br>235567_at;<br>236266_at | ROR-alpha                                     |
| 201502_s_at                                                                                | NFKBIA             |                             |                             | 211764_s_at;<br>214590_s_at                                           | UBE2D1                                        |
| 201502_s_at                                                                                | NFKBIA             |                             |                             | 211995_x_at;<br>212988_x_at                                           | Actin cytoplasmic 2                           |
| 201502_s_at                                                                                | NFKBIA             |                             |                             | 212073_at                                                             | Casein kinase II,<br>alpha chain<br>(CSNK2A1) |
| 201502_s_at                                                                                | NFKBIA             |                             |                             | 212521_s_at                                                           | PDE8A                                         |
| 201502_s_at                                                                                | NFKBIA             |                             |                             | 214744_s_at                                                           | RPL23                                         |
| 201502_s_at                                                                                | NFKBIA             |                             |                             | 215606_s_at                                                           | ELKS                                          |
| 201502_s_at                                                                                | NFKBIA             |                             |                             | 218832_x_at                                                           | Beta-arrestin1                                |
| 201502_s_at                                                                                | NFKBIA             |                             |                             | 221562_s_at                                                           | Sirtuin3                                      |
| 201502_s_at                                                                                | NFKBIA             |                             |                             | 226648_at                                                             | FIH-1                                         |
| 201502_s_at                                                                                | NFKBIA             |                             |                             | 227075_at                                                             | ELP3                                          |
| 201502_s_at                                                                                | NFKBIA             |                             |                             | 229515_at                                                             | Par-4                                         |
| 201693_s_at;<br>201694_s_at;<br>227404_s_at                                                | EGR1               |                             | x                           | 1553127_a_at                                                          | RNF168                                        |
| 201693_s_at;<br>201694_s_at;<br>227404_s_at                                                | EGR1               |                             | x                           | 1554408_a_at                                                          | TK1                                           |
| 201693_s_at;<br>201694_s_at;<br>227404_s_at                                                | EGR1               |                             | x                           | 1555832_s_at                                                          | KLF6                                          |
| 201693_s_at;<br>201694_s_at;                                                               | EGR1               |                             | x                           | 1557352_at                                                            | ERG1                                          |



| <b>IDs in active data set</b>                                                              | <b>Object name</b> | <b>miR-128 tgts_miRanda</b> | <b>Transcription Factor</b> | <b>IDs of corresponding network object from GeneGo network</b> | <b>Corresponding network object name</b> |
|--------------------------------------------------------------------------------------------|--------------------|-----------------------------|-----------------------------|----------------------------------------------------------------|------------------------------------------|
| 1552703_s_at;<br>206011_at;<br>209970_x_at;<br>211366_x_at;<br>211367_s_at;<br>211368_s_at | Caspase-1          | x                           |                             | 1552701_a_at;<br>1552703_s_at                                  | Pseudo-ICE                               |
| 227404_s_at                                                                                |                    |                             |                             |                                                                |                                          |
| 201693_s_at;<br>201694_s_at;<br>227404_s_at                                                | EGR1               |                             | x                           | 1558199_at                                                     | Fibronectin                              |
| 201693_s_at;<br>201694_s_at;<br>227404_s_at                                                | EGR1               |                             | x                           | 1558233_s_at;<br>1565269_s_at                                  | ATF-1                                    |
| 201693_s_at;<br>201694_s_at;<br>227404_s_at                                                | EGR1               |                             | x                           | 1568574_x_at                                                   | Osteopontin                              |
| 201693_s_at;<br>201694_s_at;<br>227404_s_at                                                | EGR1               |                             | x                           | 1568765_at;<br>202627_s_at;<br>202628_s_at                     | PAI1                                     |
| 201693_s_at;<br>201694_s_at;<br>227404_s_at                                                | EGR1               |                             | x                           | 1569203_at                                                     | GRO-2                                    |
| 201693_s_at;<br>201694_s_at;<br>227404_s_at                                                | EGR1               |                             | x                           | 200632_s_at                                                    | NDRG1                                    |
| 201693_s_at;<br>201694_s_at;<br>227404_s_at                                                | EGR1               |                             | x                           | 200658_s_at                                                    | Prohibitin                               |
| 201693_s_at;<br>201694_s_at;<br>227404_s_at                                                | EGR1               |                             | x                           | 200783_s_at                                                    | Stathmin                                 |
| 201693_s_at;<br>201694_s_at;<br>227404_s_at                                                | EGR1               |                             | x                           | 200952_s_at;<br>200953_s_at                                    | Cyclin D2                                |
| 201693_s_at;<br>201694_s_at;<br>227404_s_at                                                | EGR1               |                             | x                           | 201042_at;<br>211003_x_at;<br>211573_x_at                      | TGM2                                     |
| 201693_s_at;<br>201694_s_at;<br>227404_s_at                                                | EGR1               |                             | x                           | 201313_at                                                      | ENO2                                     |
| 201693_s_at;<br>201694_s_at;<br>227404_s_at                                                | EGR1               |                             | x                           | 201324_at;<br>201325_s_at;<br>213895_at                        | EMP1 (Tmp)                               |
| 201693_s_at;<br>201694_s_at;                                                               | EGR1               |                             | x                           | 201373_at;<br>216971_s_at                                      | Plectin 1                                |

| <b>IDs in active data set</b>                                                              | <b>Object name</b> | <b>miR-128 tgts_miRanda</b> | <b>Transcription Factor</b> | <b>IDs of corresponding network object from GeneGo network</b> | <b>Corresponding network object name</b> |
|--------------------------------------------------------------------------------------------|--------------------|-----------------------------|-----------------------------|----------------------------------------------------------------|------------------------------------------|
| 1552703_s_at;<br>206011_at;<br>209970_x_at;<br>211366_x_at;<br>211367_s_at;<br>211368_s_at | Caspase-1          | x                           |                             | 1552701_a_at;<br>1552703_s_at                                  | Pseudo-ICE                               |
| 227404_s_at                                                                                |                    |                             |                             |                                                                |                                          |
| 201693_s_at;<br>201694_s_at;<br>227404_s_at                                                | EGR1               |                             | x                           | 201549_x_at                                                    | PLU-1                                    |
| 201693_s_at;<br>201694_s_at;<br>227404_s_at                                                | EGR1               |                             | x                           | 201642_at                                                      | IFNGR2                                   |
| 201693_s_at;<br>201694_s_at;<br>227404_s_at                                                | EGR1               |                             | x                           | 201666_at                                                      | TIMP1                                    |
| 201693_s_at;<br>201694_s_at;<br>227404_s_at                                                | EGR1               |                             | x                           | 201714_at                                                      | Tubulin gamma 1                          |
| 201693_s_at;<br>201694_s_at;<br>227404_s_at                                                | EGR1               |                             | x                           | 202068_s_at                                                    | LDLR                                     |
| 201693_s_at;<br>201694_s_at;<br>227404_s_at                                                | EGR1               |                             | x                           | 202094_at;<br>202095_s_at                                      | Survivin                                 |
| 201693_s_at;<br>201694_s_at;<br>227404_s_at                                                | EGR1               |                             | x                           | 202304_at;<br>238961_s_at;<br>241611_s_at                      | Fndc3a                                   |
| 201693_s_at;<br>201694_s_at;<br>227404_s_at                                                | EGR1               |                             | x                           | 202314_at                                                      | CYP51A1                                  |
| 201693_s_at;<br>201694_s_at;<br>227404_s_at                                                | EGR1               |                             | x                           | 202441_at;<br>202444_s_at                                      | SPFH1                                    |
| 201693_s_at;<br>201694_s_at;<br>227404_s_at                                                | EGR1               |                             | x                           | 202517_at                                                      | CRMP1                                    |
| 201693_s_at;<br>201694_s_at;<br>227404_s_at                                                | EGR1               |                             | x                           | 202637_s_at;<br>202638_s_at;<br>215485_s_at                    | ICAM1                                    |
| 201693_s_at;<br>201694_s_at;<br>227404_s_at                                                | EGR1               |                             | x                           | 202672_s_at                                                    | ATF-3                                    |
| 201693_s_at;<br>201694_s_at;                                                               | EGR1               |                             | x                           | 202727_s_at;<br>211676_s_at                                    | IFNGR1                                   |

| <b>IDs in active data set</b>                                                              | <b>Object name</b> | <b>miR-128 tgts_miRanda</b> | <b>Transcription Factor</b> | <b>IDs of corresponding network object from GeneGo network</b> | <b>Corresponding network object name</b> |
|--------------------------------------------------------------------------------------------|--------------------|-----------------------------|-----------------------------|----------------------------------------------------------------|------------------------------------------|
| 1552703_s_at;<br>206011_at;<br>209970_x_at;<br>211366_x_at;<br>211367_s_at;<br>211368_s_at | Caspase-1          | x                           |                             | 1552701_a_at;<br>1552703_s_at                                  | Pseudo-ICE                               |
| 227404_s_at                                                                                |                    |                             |                             |                                                                |                                          |
| 201693_s_at;<br>201694_s_at;<br>227404_s_at                                                | EGR1               |                             | x                           | 202779_s_at                                                    | UBE2S                                    |
| 201693_s_at;<br>201694_s_at;<br>227404_s_at                                                | EGR1               |                             | x                           | 203504_s_at;<br>203505_at;<br>216066_at                        | ABCA1                                    |
| 201693_s_at;<br>201694_s_at;<br>227404_s_at                                                | EGR1               |                             | x                           | 204109_s_at;<br>228433_at                                      | NFYA                                     |
| 201693_s_at;<br>201694_s_at;<br>227404_s_at                                                | EGR1               |                             | x                           | 204279_at                                                      | PSMB9                                    |
| 201693_s_at;<br>201694_s_at;<br>227404_s_at                                                | EGR1               |                             | x                           | 204363_at                                                      | Tissue factor                            |
| 201693_s_at;<br>201694_s_at;<br>227404_s_at                                                | EGR1               |                             | x                           | 204654_s_at                                                    | AP-2A                                    |
| 201693_s_at;<br>201694_s_at;<br>227404_s_at                                                | EGR1               |                             | x                           | 204933_s_at                                                    | Osteoprotegerin                          |
| 201693_s_at;<br>201694_s_at;<br>227404_s_at                                                | EGR1               |                             | x                           | 204980_at                                                      | CLOCK                                    |
| 201693_s_at;<br>201694_s_at;<br>227404_s_at                                                | EGR1               |                             | x                           | 205067_at;<br>39402_at                                         | IL-1 beta                                |
| 201693_s_at;<br>201694_s_at;<br>227404_s_at                                                | EGR1               |                             | x                           | 205463_s_at;<br>216867_s_at                                    | PDGF-A                                   |
| 201693_s_at;<br>201694_s_at;<br>227404_s_at                                                | EGR1               |                             | x                           | 206377_at                                                      | FOXF2                                    |
| 201693_s_at;<br>201694_s_at;<br>227404_s_at                                                | EGR1               |                             | x                           | 206877_at;<br>228846_at                                        | MAD                                      |
| 201693_s_at;<br>201694_s_at;                                                               | EGR1               |                             | x                           | 207181_s_at                                                    | Caspase-7                                |

| <b>IDs in active data set</b>                                                              | <b>Object name</b> | <b>miR-128 tgts_miRanda</b> | <b>Transcription Factor</b> | <b>IDs of corresponding network object from GeneGo network</b>        | <b>Corresponding network object name</b> |
|--------------------------------------------------------------------------------------------|--------------------|-----------------------------|-----------------------------|-----------------------------------------------------------------------|------------------------------------------|
| 1552703_s_at;<br>206011_at;<br>209970_x_at;<br>211366_x_at;<br>211367_s_at;<br>211368_s_at | Caspase-1          | x                           |                             | 1552701_a_at;<br>1552703_s_at                                         | Pseudo-ICE                               |
| 227404_s_at                                                                                |                    |                             |                             |                                                                       |                                          |
| 201693_s_at;<br>201694_s_at;<br>227404_s_at                                                | EGR1               |                             | x                           | 208786_s_at                                                           | MAP1LC3B                                 |
| 201693_s_at;<br>201694_s_at;<br>227404_s_at                                                | EGR1               |                             | x                           | 209277_at;<br>209278_s_at                                             | TFPI-2                                   |
| 201693_s_at;<br>201694_s_at;<br>227404_s_at                                                | EGR1               |                             | x                           | 209307_at                                                             | SWAP-70                                  |
| 201693_s_at;<br>201694_s_at;<br>227404_s_at                                                | EGR1               |                             | x                           | 209332_s_at                                                           | Max                                      |
| 201693_s_at;<br>201694_s_at;<br>227404_s_at                                                | EGR1               |                             | x                           | 209408_at                                                             | MCAK                                     |
| 201693_s_at;<br>201694_s_at;<br>227404_s_at                                                | EGR1               |                             | x                           | 209457_at                                                             | DUSP5                                    |
| 201693_s_at;<br>201694_s_at;<br>227404_s_at                                                | EGR1               |                             | x                           | 209466_x_at;<br>211737_x_at                                           | Pleiotrophin (OSF1)                      |
| 201693_s_at;<br>201694_s_at;<br>227404_s_at                                                | EGR1               |                             | x                           | 209955_s_at                                                           | Seprase                                  |
| 201693_s_at;<br>201694_s_at;<br>227404_s_at                                                | EGR1               |                             | x                           | 210426_x_at;<br>210479_s_at;<br>226682_at;<br>235567_at;<br>236266_at | ROR-alpha                                |
| 201693_s_at;<br>201694_s_at;<br>227404_s_at                                                | EGR1               |                             | x                           | 210512_s_at;<br>211527_x_at                                           | VEGF-A                                   |
| 201693_s_at;<br>201694_s_at;<br>227404_s_at                                                | EGR1               |                             | x                           | 210947_s_at                                                           | MSH3                                     |
| 201693_s_at;<br>201694_s_at;<br>227404_s_at                                                | EGR1               |                             | x                           | 211323_s_at;<br>216944_s_at                                           | IP3R1                                    |

| <b>IDs in active data set</b>                                                              | <b>Object name</b> | <b>miR-128 tgts_miRanda</b> | <b>Transcription Factor</b> | <b>IDs of corresponding network object from GeneGo network</b> | <b>Corresponding network object name</b> |
|--------------------------------------------------------------------------------------------|--------------------|-----------------------------|-----------------------------|----------------------------------------------------------------|------------------------------------------|
| 1552703_s_at;<br>206011_at;<br>209970_x_at;<br>211366_x_at;<br>211367_s_at;<br>211368_s_at | Caspase-1          | x                           |                             | 1552701_a_at;<br>1552703_s_at                                  | Pseudo-ICE                               |
| 201693_s_at;<br>201694_s_at;<br>227404_s_at                                                | EGR1               |                             | x                           | 211506_s_at                                                    | IL-8                                     |
| 201693_s_at;<br>201694_s_at;<br>227404_s_at                                                | EGR1               |                             | x                           | 211711_s_at;<br>242622_x_at                                    | PTEN                                     |
| 201693_s_at;<br>201694_s_at;<br>227404_s_at                                                | EGR1               |                             | x                           | 212205_at;<br>212206_s_at                                      | H2AFV                                    |
| 201693_s_at;<br>201694_s_at;<br>227404_s_at                                                | EGR1               |                             | x                           | 212221_x_at;<br>212223_at                                      | IDS                                      |
| 201693_s_at;<br>201694_s_at;<br>227404_s_at                                                | EGR1               |                             | x                           | 212362_at                                                      | Ca-ATPase2                               |
| 201693_s_at;<br>201694_s_at;<br>227404_s_at                                                | EGR1               |                             | x                           | 212749_s_at                                                    | PIRH2                                    |
| 201693_s_at;<br>201694_s_at;<br>227404_s_at                                                | EGR1               |                             | x                           | 213003_s_at                                                    | C/EBPdelta                               |
| 201693_s_at;<br>201694_s_at;<br>227404_s_at                                                | EGR1               |                             | x                           | 213348_at                                                      | p57                                      |
| 201693_s_at;<br>201694_s_at;<br>227404_s_at                                                | EGR1               |                             | x                           | 213596_at                                                      | Caspase-4                                |
| 201693_s_at;<br>201694_s_at;<br>227404_s_at                                                | EGR1               |                             | x                           | 214443_at;<br>214444_s_at;<br>216283_s_at;<br>32699_s_at       | PVR                                      |
| 201693_s_at;<br>201694_s_at;<br>227404_s_at                                                | EGR1               |                             | x                           | 215064_at                                                      | SC5D                                     |
| 201693_s_at;<br>201694_s_at;<br>227404_s_at                                                | EGR1               |                             | x                           | 215916_at                                                      | nAChR epsilon                            |
| 201693_s_at;<br>201694_s_at;                                                               | EGR1               |                             | x                           | 217192_s_at;<br>228964_at                                      | BLIMP1 (PRDI-BF1)                        |

| <b>IDs in active data set</b>                                                              | <b>Object name</b> | <b>miR-128 tgts_miRanda</b> | <b>Transcription Factor</b> | <b>IDs of corresponding network object from GeneGo network</b> | <b>Corresponding network object name</b> |
|--------------------------------------------------------------------------------------------|--------------------|-----------------------------|-----------------------------|----------------------------------------------------------------|------------------------------------------|
| 1552703_s_at;<br>206011_at;<br>209970_x_at;<br>211366_x_at;<br>211367_s_at;<br>211368_s_at | Caspase-1          | x                           |                             | 1552701_a_at;<br>1552703_s_at                                  | Pseudo-ICE                               |
| 227404_s_at                                                                                |                    |                             |                             |                                                                |                                          |
| 201693_s_at;<br>201694_s_at;<br>227404_s_at                                                | EGR1               |                             | x                           | 217542_at                                                      | MDM2                                     |
| 201693_s_at;<br>201694_s_at;<br>227404_s_at                                                | EGR1               |                             | x                           | 217728_at                                                      | Calcyclin                                |
| 201693_s_at;<br>201694_s_at;<br>227404_s_at                                                | EGR1               |                             | x                           | 217841_s_at;<br>49077_at                                       | PPME1                                    |
| 201693_s_at;<br>201694_s_at;<br>227404_s_at                                                | EGR1               |                             | x                           | 217871_s_at                                                    | MIF                                      |
| 201693_s_at;<br>201694_s_at;<br>227404_s_at                                                | EGR1               |                             | x                           | 217999_s_at;<br>225842_at                                      | PHLDA1                                   |
| 201693_s_at;<br>201694_s_at;<br>227404_s_at                                                | EGR1               |                             | x                           | 218832_x_at                                                    | Beta-arrestin1                           |
| 201693_s_at;<br>201694_s_at;<br>227404_s_at                                                | EGR1               |                             | x                           | 219235_s_at                                                    | Phactr4                                  |
| 201693_s_at;<br>201694_s_at;<br>227404_s_at                                                | EGR1               |                             | x                           | 219306_at                                                      | HKLP2                                    |
| 201693_s_at;<br>201694_s_at;<br>227404_s_at                                                | EGR1               |                             | x                           | 219403_s_at                                                    | Heparanase 1                             |
| 201693_s_at;<br>201694_s_at;<br>227404_s_at                                                | EGR1               |                             | x                           | 220334_at                                                      | RGS17                                    |
| 201693_s_at;<br>201694_s_at;<br>227404_s_at                                                | EGR1               |                             | x                           | 221502_at                                                      | Karyopherin alpha 3                      |
| 201693_s_at;<br>201694_s_at;<br>227404_s_at                                                | EGR1               |                             | x                           | 221664_s_at                                                    | JAM1                                     |
| 201693_s_at;<br>201694_s_at;                                                               | EGR1               |                             | x                           | 221986_s_at;<br>226158_at;                                     | KLHL24                                   |

| <b>IDs in active data set</b>                                                              | <b>Object name</b> | <b>miR-128 tgts_miRanda</b> | <b>Transcription Factor</b> | <b>IDs of corresponding network object from GeneGo network</b> | <b>Corresponding network object name</b> |
|--------------------------------------------------------------------------------------------|--------------------|-----------------------------|-----------------------------|----------------------------------------------------------------|------------------------------------------|
| 1552703_s_at;<br>206011_at;<br>209970_x_at;<br>211366_x_at;<br>211367_s_at;<br>211368_s_at | Caspase-1          | x                           |                             | 1552701_a_at;<br>1552703_s_at                                  | Pseudo-ICE                               |
| 227404_s_at                                                                                |                    |                             |                             | 242088_at                                                      |                                          |
| 201693_s_at;<br>201694_s_at;<br>227404_s_at                                                | EGR1               |                             | x                           | 222173_s_at                                                    | TBC1D2                                   |
| 201693_s_at;<br>201694_s_at;<br>227404_s_at                                                | EGR1               |                             | x                           | 224861_at                                                      | G-protein alpha-q                        |
| 201693_s_at;<br>201694_s_at;<br>227404_s_at                                                | EGR1               |                             | x                           | 226005_at                                                      | UBE2G1                                   |
| 201693_s_at;<br>201694_s_at;<br>227404_s_at                                                | EGR1               |                             | x                           | 226075_at                                                      | SSB1                                     |
| 201693_s_at;<br>201694_s_at;<br>227404_s_at                                                | EGR1               |                             | x                           | 226336_at                                                      | Cyclophilin A                            |
| 201693_s_at;<br>201694_s_at;<br>227404_s_at                                                | EGR1               |                             | x                           | 228065_at                                                      | BCL9-2                                   |
| 201693_s_at;<br>201694_s_at;<br>227404_s_at                                                | EGR1               |                             | x                           | 230329_s_at                                                    | GFG-1                                    |
| 201693_s_at;<br>201694_s_at;<br>227404_s_at                                                | EGR1               |                             | x                           | 231801_at                                                      | NF-AT1(NFATC2)                           |
| 201693_s_at;<br>201694_s_at;<br>227404_s_at                                                | EGR1               |                             | x                           | 231966_at                                                      | Neurabin-1                               |
| 201693_s_at;<br>201694_s_at;<br>227404_s_at                                                | EGR1               |                             | x                           | 233781_s_at                                                    | RIF1                                     |
| 201693_s_at;<br>201694_s_at;<br>227404_s_at                                                | EGR1               |                             | x                           | 236281_x_at                                                    | HTR7                                     |
| 201693_s_at;<br>201694_s_at;<br>227404_s_at                                                | EGR1               |                             | x                           | 242482_at                                                      | PRKAR1A                                  |
| 201693_s_at;<br>201694_s_at;                                                               | EGR1               |                             | x                           | 242707_at                                                      | DRIP130                                  |

| <b>IDs in active data set</b>                                                              | <b>Object name</b> | <b>miR-128 tgts_miRanda</b> | <b>Transcription Factor</b> | <b>IDs of corresponding network object from GeneGo network</b> | <b>Corresponding network object name</b> |
|--------------------------------------------------------------------------------------------|--------------------|-----------------------------|-----------------------------|----------------------------------------------------------------|------------------------------------------|
| 1552703_s_at;<br>206011_at;<br>209970_x_at;<br>211366_x_at;<br>211367_s_at;<br>211368_s_at | Caspase-1          | x                           |                             | 1552701_a_at;<br>1552703_s_at                                  | Pseudo-ICE                               |
| 227404_s_at                                                                                |                    |                             |                             |                                                                |                                          |
| 201693_s_at;<br>201694_s_at;<br>227404_s_at                                                | EGR1               |                             | x                           | 244463_at                                                      | ADAM23                                   |
| 201862_s_at                                                                                | LRRFIP1            | x                           | x                           | 1565483_at                                                     | EGFR                                     |
| 201862_s_at                                                                                | LRRFIP1            | x                           | x                           | 202240_at                                                      | PLK1                                     |
| 201862_s_at                                                                                | LRRFIP1            | x                           | x                           | 204654_s_at                                                    | AP-2A                                    |
| 201862_s_at                                                                                | LRRFIP1            | x                           | x                           | 205463_s_at;<br>216867_s_at                                    | PDGF-A                                   |
| 201862_s_at                                                                                | LRRFIP1            | x                           | x                           | 205731_s_at;<br>205732_s_at                                    | NCOA2<br>(GRIP1/TIF2)                    |
| 201862_s_at                                                                                | LRRFIP1            | x                           | x                           | 223679_at                                                      | Beta-catenin                             |
| 202240_at                                                                                  | PLK1               |                             |                             | 1553502_a_at                                                   | AKAP2                                    |
| 202240_at                                                                                  | PLK1               |                             |                             | 1553690_at                                                     | Sgol                                     |
| 202240_at                                                                                  | PLK1               |                             |                             | 1554264_at;<br>218252_at                                       | CKAP2                                    |
| 202240_at                                                                                  | PLK1               |                             |                             | 1554462_a_at;<br>202842_s_at;<br>202843_at                     | DnaJB9                                   |
| 202240_at                                                                                  | PLK1               |                             |                             | 1554768_a_at;<br>203362_s_at                                   | MAD2a                                    |
| 202240_at                                                                                  | PLK1               |                             |                             | 1556051_a_at                                                   | BICD1                                    |
| 202240_at                                                                                  | PLK1               |                             |                             | 1561079_at;<br>213035_at;<br>226025_at;<br>229307_at           | ANKRD28                                  |
| 202240_at                                                                                  | PLK1               |                             |                             | 1568574_x_at                                                   | Osteopontin                              |
| 202240_at                                                                                  | PLK1               |                             |                             | 201316_at                                                      | PSMA2                                    |
| 202240_at                                                                                  | PLK1               |                             |                             | 201458_s_at;<br>209974_s_at                                    | BUB3                                     |
| 202240_at                                                                                  | PLK1               |                             |                             | 201896_s_at                                                    | DDA3                                     |
| 202240_at                                                                                  | PLK1               |                             |                             | 201939_at                                                      | PLK2                                     |
| 202240_at                                                                                  | PLK1               |                             |                             | 202094_at;<br>202095_s_at                                      | Survivin                                 |
| 202240_at                                                                                  | PLK1               |                             |                             | 202384_s_at                                                    | TCOF1                                    |
| 202240_at                                                                                  | PLK1               |                             |                             | 202580_x_at                                                    | FOXO1                                    |
| 202240_at                                                                                  | PLK1               |                             |                             | 204026_s_at                                                    | HZWint-1                                 |
| 202240_at                                                                                  | PLK1               |                             |                             | 204318_s_at                                                    | GTSE1                                    |
| 202240_at                                                                                  | PLK1               |                             |                             | 204444_at                                                      | KNL1                                     |



| <b>IDs in active data set</b>                                                              | <b>Object name</b> | <b>miR-128 tgts_miRanda</b> | <b>Transcription Factor</b> | <b>IDs of corresponding network object from GeneGo network</b> | <b>Corresponding network object name</b> |
|--------------------------------------------------------------------------------------------|--------------------|-----------------------------|-----------------------------|----------------------------------------------------------------|------------------------------------------|
| 1552703_s_at;<br>206011_at;<br>209970_x_at;<br>211366_x_at;<br>211367_s_at;<br>211368_s_at | Caspase-1          | x                           |                             | 1552701_a_at;<br>1552703_s_at                                  | Pseudo-ICE                               |
| 202240_at                                                                                  | PLK1               |                             |                             | 204641_at;<br>211080_s_at                                      | Nek2A                                    |
| 202240_at                                                                                  | PLK1               |                             |                             | 205167_s_at;<br>216914_at;<br>217010_s_at                      | CDC25C                                   |
| 202240_at                                                                                  | PLK1               |                             |                             | 207828_s_at;<br>209172_s_at                                    | CENP-F                                   |
| 202240_at                                                                                  | PLK1               |                             |                             | 209251_x_at;<br>211750_x_at                                    | Tubulin alpha-1C                         |
| 202240_at                                                                                  | PLK1               |                             |                             | 209341_s_at                                                    | IKK-beta                                 |
| 202240_at                                                                                  | PLK1               |                             |                             | 209680_s_at                                                    | MKLP2                                    |
| 202240_at                                                                                  | PLK1               |                             |                             | 210440_s_at;<br>210743_s_at                                    | CDC14a                                   |
| 202240_at                                                                                  | PLK1               |                             |                             | 210793_s_at                                                    | NUP98                                    |
| 202240_at                                                                                  | PLK1               |                             |                             | 211077_s_at                                                    | TLK1                                     |
| 202240_at                                                                                  | PLK1               |                             |                             | 211986_at                                                      | AHNAK                                    |
| 202240_at                                                                                  | PLK1               |                             |                             | 212480_at                                                      | KIAA0376                                 |
| 202240_at                                                                                  | PLK1               |                             |                             | 212533_at                                                      | Wee1                                     |
| 202240_at                                                                                  | PLK1               |                             |                             | 212801_at                                                      | Citron                                   |
| 202240_at                                                                                  | PLK1               |                             |                             | 213746_s_at;<br>214752_x_at                                    | Filamin A                                |
| 202240_at                                                                                  | PLK1               |                             |                             | 213750_at                                                      | RSL1D1                                   |
| 202240_at                                                                                  | PLK1               |                             |                             | 214073_at                                                      | Cortactin                                |
| 202240_at                                                                                  | PLK1               |                             |                             | 214607_at                                                      | PAK3                                     |
| 202240_at                                                                                  | PLK1               |                             |                             | 214856_at;<br>215918_s_at                                      | Beta-fodrin                              |
| 202240_at                                                                                  | PLK1               |                             |                             | 214948_s_at                                                    | TMF1                                     |
| 202240_at                                                                                  | PLK1               |                             |                             | 215606_s_at                                                    | ELKS                                     |
| 202240_at                                                                                  | PLK1               |                             |                             | 217542_at                                                      | MDM2                                     |
| 202240_at                                                                                  | PLK1               |                             |                             | 218542_at                                                      | Cep55                                    |
| 202240_at                                                                                  | PLK1               |                             |                             | 218883_s_at                                                    | CENP-50                                  |
| 202240_at                                                                                  | PLK1               |                             |                             | 219918_s_at;<br>232238_at                                      | ASPM                                     |
| 202240_at                                                                                  | PLK1               |                             |                             | 221520_s_at                                                    | CDCA8                                    |
| 202240_at                                                                                  | PLK1               |                             |                             | 222036_s_at;<br>222037_at                                      | MCM4                                     |
| 202240_at                                                                                  | PLK1               |                             |                             | 222077_s_at                                                    | RacGAP1                                  |
| 202240_at                                                                                  | PLK1               |                             |                             | 222685_at                                                      | HAUS6                                    |

| <b>IDs in active data set</b>                                                              | <b>Object name</b> | <b>miR-128 tgts_miRanda</b> | <b>Transcription Factor</b> | <b>IDs of corresponding network object from GeneGo network</b> | <b>Corresponding network object name</b> |
|--------------------------------------------------------------------------------------------|--------------------|-----------------------------|-----------------------------|----------------------------------------------------------------|------------------------------------------|
| 1552703_s_at;<br>206011_at;<br>209970_x_at;<br>211366_x_at;<br>211367_s_at;<br>211368_s_at | Caspase-1          | x                           |                             | 1552701_a_at;<br>1552703_s_at                                  | Pseudo-ICE                               |
| 202240_at                                                                                  | PLK1               |                             |                             | 226336_at                                                      | Cyclophilin A                            |
| 202240_at                                                                                  | PLK1               |                             |                             | 241813_at                                                      | MBD1                                     |
| 202240_at                                                                                  | PLK1               |                             |                             | 242030_at                                                      | Kanadaplin                               |
| 202580_x_at                                                                                | FOXM1              |                             | x                           | 1552656_s_at;<br>227740_at;<br>235003_at                       | KIS                                      |
| 202580_x_at                                                                                | FOXM1              |                             | x                           | 200783_s_at                                                    | Stathmin                                 |
| 202580_x_at                                                                                | FOXM1              |                             | x                           | 201853_s_at                                                    | CDC25B                                   |
| 202580_x_at                                                                                | FOXM1              |                             | x                           | 201897_s_at                                                    | CKS1                                     |
| 202580_x_at                                                                                | FOXM1              |                             | x                           | 202094_at;<br>202095_s_at                                      | Survivin                                 |
| 202580_x_at                                                                                | FOXM1              |                             | x                           | 202678_at                                                      | TFIIA gamma chain                        |
| 202580_x_at                                                                                | FOXM1              |                             | x                           | 203655_at                                                      | XRCC1                                    |
| 202580_x_at                                                                                | FOXM1              |                             | x                           | 204826_at                                                      | Cyclin F                                 |
| 202580_x_at                                                                                | FOXM1              |                             | x                           | 205015_s_at;<br>211258_s_at                                    | TGF-alpha                                |
| 202580_x_at                                                                                | FOXM1              |                             | x                           | 205167_s_at;<br>216914_at;<br>217010_s_at                      | CDC25C                                   |
| 202580_x_at                                                                                | FOXM1              |                             | x                           | 205235_s_at                                                    | KRMP1                                    |
| 202580_x_at                                                                                | FOXM1              |                             | x                           | 207828_s_at;<br>209172_s_at                                    | CENP-F                                   |
| 202580_x_at                                                                                | FOXM1              |                             | x                           | 210477_x_at;<br>226048_at                                      | JNK1(MAPK8)                              |
| 202580_x_at                                                                                | FOXM1              |                             | x                           | 210512_s_at;<br>211527_x_at                                    | VEGF-A                                   |
| 202580_x_at                                                                                | FOXM1              |                             | x                           | 213007_at                                                      | FANCI (KIAA1794)                         |
| 202580_x_at                                                                                | FOXM1              |                             | x                           | 213012_at                                                      | NEDD4                                    |
| 203035_s_at                                                                                | PIAS3              |                             | x                           | 1558233_s_at;<br>1565269_s_at                                  | ATF-1                                    |
| 203035_s_at                                                                                | PIAS3              |                             | x                           | 1567223_at;<br>1567224_at                                      | HMGA2                                    |
| 203035_s_at                                                                                | PIAS3              |                             | x                           | 202599_s_at;<br>202600_s_at                                    | RIP140                                   |
| 203035_s_at                                                                                | PIAS3              |                             | x                           | 205731_s_at;<br>205732_s_at                                    | NCOA2<br>(GRIP1/TIF2)                    |
| 203035_s_at                                                                                | PIAS3              |                             | x                           | 208213_s_at;<br>210078_s_at;<br>210079_x_at;                   | KCNAB1                                   |

| <b>IDs in active data set</b>                                                              | <b>Object name</b> | <b>miR-128 tgts_miRanda</b> | <b>Transcription Factor</b> | <b>IDs of corresponding network object from GeneGo network</b>        | <b>Corresponding network object name</b> |
|--------------------------------------------------------------------------------------------|--------------------|-----------------------------|-----------------------------|-----------------------------------------------------------------------|------------------------------------------|
| 1552703_s_at;<br>206011_at;<br>209970_x_at;<br>211366_x_at;<br>211367_s_at;<br>211368_s_at | Caspase-1          | x                           |                             | 1552701_a_at;<br>1552703_s_at                                         | Pseudo-ICE                               |
|                                                                                            |                    |                             |                             | 210471_s_at                                                           |                                          |
| 203035_s_at                                                                                | PIAS3              |                             | x                           | 208991_at;<br>208992_s_at;<br>225289_at                               | STAT3                                    |
| 203035_s_at                                                                                | PIAS3              |                             | x                           | 209339_at                                                             | SIAH2                                    |
| 203035_s_at                                                                                | PIAS3              |                             | x                           | 210426_x_at;<br>210479_s_at;<br>226682_at;<br>235567_at;<br>236266_at | ROR-alpha                                |
| 203035_s_at                                                                                | PIAS3              |                             | x                           | 212287_at                                                             | SUZ12                                    |
| 203035_s_at                                                                                | PIAS3              |                             | x                           | 218284_at                                                             | SMAD3                                    |
| 203035_s_at                                                                                | PIAS3              |                             | x                           | 219497_s_at;<br>219498_s_at;<br>222891_s_at                           | CTIP1                                    |
| 203035_s_at                                                                                | PIAS3              |                             | x                           | 221924_at                                                             | Zimp7                                    |
| 203035_s_at                                                                                | PIAS3              |                             | x                           | 224889_at;<br>231548_at                                               | FOXO3A                                   |
| 203035_s_at                                                                                | PIAS3              |                             | x                           | 226066_at                                                             | MITF                                     |
| 203035_s_at                                                                                | PIAS3              |                             | x                           | 226563_at;<br>235598_at                                               | SMAD2                                    |
| 203035_s_at                                                                                | PIAS3              |                             | x                           | 226687_at                                                             | HYP A                                    |
| 203035_s_at                                                                                | PIAS3              |                             | x                           | 241813_at                                                             | MBD1                                     |
| 203065_s_at;<br>212097_at                                                                  | Caveolin-1         | x                           |                             | 1552648_a_at;<br>231775_at                                            | DR4(TNFRSF10A)                           |
| 203065_s_at;<br>212097_at                                                                  | Caveolin-1         | x                           |                             | 1552671_a_at                                                          | NHE7                                     |
| 203065_s_at;<br>212097_at                                                                  | Caveolin-1         | x                           |                             | 1553994_at;<br>227486_at                                              | 5'-NTD                                   |
| 203065_s_at;<br>212097_at                                                                  | Caveolin-1         | x                           |                             | 200021_at                                                             | Cofilin, non-muscle                      |
| 203065_s_at;<br>212097_at                                                                  | Caveolin-1         | x                           |                             | 200783_s_at                                                           | Stathmin                                 |
| 203065_s_at;<br>212097_at                                                                  | Caveolin-1         | x                           |                             | 200894_s_at;<br>200895_s_at                                           | FKBP4                                    |
| 203065_s_at;<br>212097_at                                                                  | Caveolin-1         | x                           |                             | 201313_at                                                             | ENO2                                     |
| 203065_s_at;<br>212097_at                                                                  | Caveolin-1         | x                           |                             | 201549_x_at                                                           | PLU-1                                    |

| <b>IDs in active data set</b>                                                              | <b>Object name</b> | <b>miR-128 tgts_miRanda</b> | <b>Transcription Factor</b> | <b>IDs of corresponding network object from GeneGo network</b> | <b>Corresponding network object name</b> |
|--------------------------------------------------------------------------------------------|--------------------|-----------------------------|-----------------------------|----------------------------------------------------------------|------------------------------------------|
| 1552703_s_at;<br>206011_at;<br>209970_x_at;<br>211366_x_at;<br>211367_s_at;<br>211368_s_at | Caspase-1          | x                           |                             | 1552701_a_at;<br>1552703_s_at                                  | Pseudo-ICE                               |
| 203065_s_at;<br>212097_at                                                                  | Caveolin-1         | x                           |                             | 201693_s_at;<br>201694_s_at;<br>227404_s_at                    | EGR1                                     |
| 203065_s_at;<br>212097_at                                                                  | Caveolin-1         | x                           |                             | 201840_at                                                      | NEDD8                                    |
| 203065_s_at;<br>212097_at                                                                  | Caveolin-1         | x                           |                             | 203010_at                                                      | STAT5A                                   |
| 203065_s_at;<br>212097_at                                                                  | Caveolin-1         | x                           |                             | 203504_s_at;<br>203505_at;<br>216066_at                        | ABCA1                                    |
| 203065_s_at;<br>212097_at                                                                  | Caveolin-1         | x                           |                             | 204186_s_at;<br>228469_at                                      | Cyclophilin D                            |
| 203065_s_at;<br>212097_at                                                                  | Caveolin-1         | x                           |                             | 205032_at;<br>227314_at                                        | ITGA2                                    |
| 203065_s_at;<br>212097_at                                                                  | Caveolin-1         | x                           |                             | 205715_at                                                      | BST1                                     |
| 203065_s_at;<br>212097_at                                                                  | Caveolin-1         | x                           |                             | 208591_s_at                                                    | PDE3B                                    |
| 203065_s_at;<br>212097_at                                                                  | Caveolin-1         | x                           |                             | 209925_at                                                      | Occludin                                 |
| 203065_s_at;<br>212097_at                                                                  | Caveolin-1         | x                           |                             | 210449_x_at;<br>211561_x_at                                    | p38alpha (MAPK14)                        |
| 203065_s_at;<br>212097_at                                                                  | Caveolin-1         | x                           |                             | 210753_s_at;<br>211898_s_at;<br>230425_at                      | Ephrin-B receptor 1                      |
| 203065_s_at;<br>212097_at                                                                  | Caveolin-1         | x                           |                             | 211074_at                                                      | FR-alpha                                 |
| 203065_s_at;<br>212097_at                                                                  | Caveolin-1         | x                           |                             | 211323_s_at;<br>216944_s_at                                    | IP3R1                                    |
| 203065_s_at;<br>212097_at                                                                  | Caveolin-1         | x                           |                             | 211711_s_at;<br>242622_x_at                                    | PTEN                                     |
| 203065_s_at;<br>212097_at                                                                  | Caveolin-1         | x                           |                             | 212218_s_at                                                    | FASN                                     |
| 203065_s_at;<br>212097_at                                                                  | Caveolin-1         | x                           |                             | 212287_at                                                      | SUZ12                                    |
| 203065_s_at;<br>212097_at                                                                  | Caveolin-1         | x                           |                             | 212549_at                                                      | STAT5B                                   |
| 203065_s_at;<br>212097_at                                                                  | Caveolin-1         | x                           |                             | 213010_at                                                      | PRKCDBP                                  |

| <b>IDs in active data set</b>                                                              | <b>Object name</b> | <b>miR-128 tgts_miRanda</b> | <b>Transcription Factor</b> | <b>IDs of corresponding network object from GeneGo network</b> | <b>Corresponding network object name</b> |
|--------------------------------------------------------------------------------------------|--------------------|-----------------------------|-----------------------------|----------------------------------------------------------------|------------------------------------------|
| 1552703_s_at;<br>206011_at;<br>209970_x_at;<br>211366_x_at;<br>211367_s_at;<br>211368_s_at | Caspase-1          | x                           |                             | 1552701_a_at;<br>1552703_s_at                                  | Pseudo-ICE                               |
| 203065_s_at;<br>212097_at                                                                  | Caveolin-1         | x                           |                             | 213746_s_at;<br>214752_x_at                                    | Filamin A                                |
| 203065_s_at;<br>212097_at                                                                  | Caveolin-1         | x                           |                             | 215346_at;<br>222292_at                                        | CD40(TNFRSF5)                            |
| 203065_s_at;<br>212097_at                                                                  | Caveolin-1         | x                           |                             | 216985_s_at                                                    | Syntaxin 3                               |
| 203065_s_at;<br>212097_at                                                                  | Caveolin-1         | x                           |                             | 217963_s_at                                                    | NADE(NGFRAP1)                            |
| 203065_s_at;<br>212097_at                                                                  | Caveolin-1         | x                           |                             | 221489_s_at                                                    | SPRY4                                    |
| 203065_s_at;<br>212097_at                                                                  | Caveolin-1         | x                           |                             | 224861_at                                                      | G-protein alpha-q                        |
| 203065_s_at;<br>212097_at                                                                  | Caveolin-1         | x                           |                             | 226336_at                                                      | Cyclophilin A                            |
| 203065_s_at;<br>212097_at                                                                  | Caveolin-1         | x                           |                             | 226563_at;<br>235598_at                                        | SMAD2                                    |
| 203065_s_at;<br>212097_at                                                                  | Caveolin-1         | x                           |                             | 235412_at                                                      | BETA-PIX                                 |
| 203065_s_at;<br>212097_at                                                                  | Caveolin-1         | x                           |                             | 238669_at                                                      | COX-1 (PTGS1)                            |
| 203065_s_at;<br>212097_at                                                                  | Caveolin-1         | x                           |                             | 244508_at                                                      | Septin 7                                 |
| 203065_s_at;<br>212097_at                                                                  | Caveolin-1         | x                           |                             | 34697_at                                                       | LRP6                                     |
| 203213_at;<br>203214_x_at;<br>210559_s_at                                                  | CDK1 (p34)         |                             |                             | 1553502_a_at                                                   | AKAP2                                    |
| 203213_at;<br>203214_x_at;<br>210559_s_at                                                  | CDK1 (p34)         |                             |                             | 1554264_at;<br>218252_at                                       | CKAP2                                    |
| 203213_at;<br>203214_x_at;<br>210559_s_at                                                  | CDK1 (p34)         |                             |                             | 1554481_a_at;<br>214530_x_at                                   | EPB41                                    |
| 203213_at;<br>203214_x_at;<br>210559_s_at                                                  | CDK1 (p34)         |                             |                             | 1554634_at                                                     | APRIN                                    |
| 203213_at;<br>203214_x_at;<br>210559_s_at                                                  | CDK1 (p34)         |                             |                             | 1565483_at                                                     | EGFR                                     |

| <b>IDs in active data set</b>                                                              | <b>Object name</b> | <b>miR-128 tgts_miRanda</b> | <b>Transcription Factor</b> | <b>IDs of corresponding network object from GeneGo network</b> | <b>Corresponding network object name</b> |
|--------------------------------------------------------------------------------------------|--------------------|-----------------------------|-----------------------------|----------------------------------------------------------------|------------------------------------------|
| 1552703_s_at;<br>206011_at;<br>209970_x_at;<br>211366_x_at;<br>211367_s_at;<br>211368_s_at | Caspase-1          | x                           |                             | 1552701_a_at;<br>1552703_s_at                                  | Pseudo-ICE                               |
| 203213_at;<br>203214_x_at;<br>210559_s_at                                                  | CDK1<br>(p34)      |                             |                             | 1567223_at;<br>1567224_at                                      | HMGA2                                    |
| 203213_at;<br>203214_x_at;<br>210559_s_at                                                  | CDK1<br>(p34)      |                             |                             | 1570425_s_at                                                   | LATS1                                    |
| 203213_at;<br>203214_x_at;<br>210559_s_at                                                  | CDK1<br>(p34)      |                             |                             | 200711_s_at;<br>200719_at                                      | SKP1                                     |
| 203213_at;<br>203214_x_at;<br>210559_s_at                                                  | CDK1<br>(p34)      |                             |                             | 200726_at                                                      | PP1-cat gamma                            |
| 203213_at;<br>203214_x_at;<br>210559_s_at                                                  | CDK1<br>(p34)      |                             |                             | 200783_s_at                                                    | Stathmin                                 |
| 203213_at;<br>203214_x_at;<br>210559_s_at                                                  | CDK1<br>(p34)      |                             |                             | 201320_at                                                      | BAF170                                   |
| 203213_at;<br>203214_x_at;<br>210559_s_at                                                  | CDK1<br>(p34)      |                             |                             | 201373_at;<br>216971_s_at                                      | Plectin 1                                |
| 203213_at;<br>203214_x_at;<br>210559_s_at                                                  | CDK1<br>(p34)      |                             |                             | 201397_at                                                      | SERA                                     |
| 203213_at;<br>203214_x_at;<br>210559_s_at                                                  | CDK1<br>(p34)      |                             |                             | 201615_x_at                                                    | Caldesmon                                |
| 203213_at;<br>203214_x_at;<br>210559_s_at                                                  | CDK1<br>(p34)      |                             |                             | 201853_s_at                                                    | CDC25B                                   |
| 203213_at;<br>203214_x_at;<br>210559_s_at                                                  | CDK1<br>(p34)      |                             |                             | 201897_s_at                                                    | CKS1                                     |
| 203213_at;<br>203214_x_at;<br>210559_s_at                                                  | CDK1<br>(p34)      |                             |                             | 202094_at;<br>202095_s_at                                      | Survivin                                 |
| 203213_at;<br>203214_x_at;<br>210559_s_at                                                  | CDK1<br>(p34)      |                             |                             | 202240_at                                                      | PLK1                                     |

| <b>IDs in active data set</b>                                                              | <b>Object name</b> | <b>miR-128 tgts_miRanda</b> | <b>Transcription Factor</b> | <b>IDs of corresponding network object from GeneGo network</b> | <b>Corresponding network object name</b> |
|--------------------------------------------------------------------------------------------|--------------------|-----------------------------|-----------------------------|----------------------------------------------------------------|------------------------------------------|
| 1552703_s_at;<br>206011_at;<br>209970_x_at;<br>211366_x_at;<br>211367_s_at;<br>211368_s_at | Caspase-1          | x                           |                             | 1552701_a_at;<br>1552703_s_at                                  | Pseudo-ICE                               |
| 203213_at;<br>203214_x_at;<br>210559_s_at                                                  | CDK1<br>(p34)      |                             |                             | 202384_s_at                                                    | TCOF1                                    |
| 203213_at;<br>203214_x_at;<br>210559_s_at                                                  | CDK1<br>(p34)      |                             |                             | 202580_x_at                                                    | FOXMI                                    |
| 203213_at;<br>203214_x_at;<br>210559_s_at                                                  | CDK1<br>(p34)      |                             |                             | 202704_at                                                      | Tob1                                     |
| 203213_at;<br>203214_x_at;<br>210559_s_at                                                  | CDK1<br>(p34)      |                             |                             | 203220_s_at;<br>203222_s_at                                    | TLE1                                     |
| 203213_at;<br>203214_x_at;<br>210559_s_at                                                  | CDK1<br>(p34)      |                             |                             | 203276_at                                                      | Lamin B1                                 |
| 203213_at;<br>203214_x_at;<br>210559_s_at                                                  | CDK1<br>(p34)      |                             |                             | 203298_s_at                                                    | JARID2                                   |
| 203213_at;<br>203214_x_at;<br>210559_s_at                                                  | CDK1<br>(p34)      |                             |                             | 203554_x_at                                                    | Securin                                  |
| 203213_at;<br>203214_x_at;<br>210559_s_at                                                  | CDK1<br>(p34)      |                             |                             | 203564_at                                                      | FANCG                                    |
| 203213_at;<br>203214_x_at;<br>210559_s_at                                                  | CDK1<br>(p34)      |                             |                             | 204109_s_at;<br>228433_at                                      | NFYA                                     |
| 203213_at;<br>203214_x_at;<br>210559_s_at                                                  | CDK1<br>(p34)      |                             |                             | 204170_s_at                                                    | CKS2                                     |
| 203213_at;<br>203214_x_at;<br>210559_s_at                                                  | CDK1<br>(p34)      |                             |                             | 204444_at                                                      | KNSL1                                    |
| 203213_at;<br>203214_x_at;<br>210559_s_at                                                  | CDK1<br>(p34)      |                             |                             | 204502_at                                                      | SAMHD1                                   |
| 203213_at;<br>203214_x_at;<br>210559_s_at                                                  | CDK1<br>(p34)      |                             |                             | 204767_s_at;<br>204768_s_at                                    | FEN1                                     |

| <b>IDs in active data set</b>                                                              | <b>Object name</b> | <b>miR-128 tgts_miRanda</b> | <b>Transcription Factor</b> | <b>IDs of corresponding network object from GeneGo network</b> | <b>Corresponding network object name</b> |
|--------------------------------------------------------------------------------------------|--------------------|-----------------------------|-----------------------------|----------------------------------------------------------------|------------------------------------------|
| 1552703_s_at;<br>206011_at;<br>209970_x_at;<br>211366_x_at;<br>211367_s_at;<br>211368_s_at | Caspase-1          | x                           |                             | 1552701_a_at;<br>1552703_s_at                                  | Pseudo-ICE                               |
| 203213_at;<br>203214_x_at;<br>210559_s_at                                                  | CDK1 (p34)         |                             |                             | 204826_at                                                      | Cyclin F                                 |
| 203213_at;<br>203214_x_at;<br>210559_s_at                                                  | CDK1 (p34)         |                             |                             | 204920_at;<br>217564_s_at                                      | CPSM                                     |
| 203213_at;<br>203214_x_at;<br>210559_s_at                                                  | CDK1 (p34)         |                             |                             | 205167_s_at;<br>216914_at;<br>217010_s_at                      | CDC25C                                   |
| 203213_at;<br>203214_x_at;<br>210559_s_at                                                  | CDK1 (p34)         |                             |                             | 205899_at                                                      | Cyclin A1                                |
| 203213_at;<br>203214_x_at;<br>210559_s_at                                                  | CDK1 (p34)         |                             |                             | 206665_s_at;<br>212312_at                                      | Bcl-XL                                   |
| 203213_at;<br>203214_x_at;<br>210559_s_at                                                  | CDK1 (p34)         |                             |                             | 208093_s_at                                                    | NUDEL                                    |
| 203213_at;<br>203214_x_at;<br>210559_s_at                                                  | CDK1 (p34)         |                             |                             | 208553_at                                                      | HIST1H1E                                 |
| 203213_at;<br>203214_x_at;<br>210559_s_at                                                  | CDK1 (p34)         |                             |                             | 208991_at;<br>208992_s_at;<br>225289_at                        | STAT3                                    |
| 203213_at;<br>203214_x_at;<br>210559_s_at                                                  | CDK1 (p34)         |                             |                             | 209615_s_at                                                    | PAK1                                     |
| 203213_at;<br>203214_x_at;<br>210559_s_at                                                  | CDK1 (p34)         |                             |                             | 209753_s_at                                                    | TMPOA                                    |
| 203213_at;<br>203214_x_at;<br>210559_s_at                                                  | CDK1 (p34)         |                             |                             | 211074_at                                                      | FR-alpha                                 |
| 203213_at;<br>203214_x_at;<br>210559_s_at                                                  | CDK1 (p34)         |                             |                             | 211928_at                                                      | Dynein 1, cytoplasmic, heavy chain       |
| 203213_at;<br>203214_x_at;<br>210559_s_at                                                  | CDK1 (p34)         |                             |                             | 211986_at                                                      | AHNAK                                    |



| <b>IDs in active data set</b>                                                              | <b>Object name</b> | <b>miR-128 tgts_miRanda</b> | <b>Transcription Factor</b> | <b>IDs of corresponding network object from GeneGo network</b> | <b>Corresponding network object name</b> |
|--------------------------------------------------------------------------------------------|--------------------|-----------------------------|-----------------------------|----------------------------------------------------------------|------------------------------------------|
| 1552703_s_at;<br>206011_at;<br>209970_x_at;<br>211366_x_at;<br>211367_s_at;<br>211368_s_at | Caspase-1          | x                           |                             | 1552701_a_at;<br>1552703_s_at                                  | Pseudo-ICE                               |
| 203213_at;<br>203214_x_at;<br>210559_s_at                                                  | CDK1 (p34)         |                             |                             | 212020_s_at;<br>212021_s_at;<br>212023_s_at                    | Antigen KI-67                            |
| 203213_at;<br>203214_x_at;<br>210559_s_at                                                  | CDK1 (p34)         |                             |                             | 212073_at                                                      | Casein kinase II, alpha chain (CSNK2A1)  |
| 203213_at;<br>203214_x_at;<br>210559_s_at                                                  | CDK1 (p34)         |                             |                             | 212426_s_at                                                    | 14-3-3 theta                             |
| 203213_at;<br>203214_x_at;<br>210559_s_at                                                  | CDK1 (p34)         |                             |                             | 212533_at                                                      | Wee1                                     |
| 203213_at;<br>203214_x_at;<br>210559_s_at                                                  | CDK1 (p34)         |                             |                             | 212836_at                                                      | POLD reg (p68)                           |
| 203213_at;<br>203214_x_at;<br>210559_s_at                                                  | CDK1 (p34)         |                             |                             | 212934_at                                                      | UBXN2B                                   |
| 203213_at;<br>203214_x_at;<br>210559_s_at                                                  | CDK1 (p34)         |                             |                             | 212949_at                                                      | BRRN1                                    |
| 203213_at;<br>203214_x_at;<br>210559_s_at                                                  | CDK1 (p34)         |                             |                             | 213226_at                                                      | Cyclin A2                                |
| 203213_at;<br>203214_x_at;<br>210559_s_at                                                  | CDK1 (p34)         |                             |                             | 213324_at                                                      | c-Src                                    |
| 203213_at;<br>203214_x_at;<br>210559_s_at                                                  | CDK1 (p34)         |                             |                             | 213348_at                                                      | p57                                      |
| 203213_at;<br>203214_x_at;<br>210559_s_at                                                  | CDK1 (p34)         |                             |                             | 213359_at;<br>221480_at                                        | AUF1                                     |
| 203213_at;<br>203214_x_at;<br>210559_s_at                                                  | CDK1 (p34)         |                             |                             | 213746_s_at;<br>214752_x_at                                    | Filamin A                                |
| 203213_at;<br>203214_x_at;<br>210559_s_at                                                  | CDK1 (p34)         |                             |                             | 214073_at                                                      | Cortactin                                |

| <b>IDs in active data set</b>                                                              | <b>Object name</b> | <b>miR-128 tgts_miRanda</b> | <b>Transcription Factor</b> | <b>IDs of corresponding network object from GeneGo network</b>            | <b>Corresponding network object name</b> |
|--------------------------------------------------------------------------------------------|--------------------|-----------------------------|-----------------------------|---------------------------------------------------------------------------|------------------------------------------|
| 1552703_s_at;<br>206011_at;<br>209970_x_at;<br>211366_x_at;<br>211367_s_at;<br>211368_s_at | Caspase-1          | x                           |                             | 1552701_a_at;<br>1552703_s_at                                             | Pseudo-ICE                               |
| 203213_at;<br>203214_x_at;<br>210559_s_at                                                  | CDK1 (p34)         |                             |                             | 214195_at                                                                 | CLN2 (Tripeptidyl-peptidase I)           |
| 203213_at;<br>203214_x_at;<br>210559_s_at                                                  | CDK1 (p34)         |                             |                             | 215905_s_at                                                               | HPRP8BP                                  |
| 203213_at;<br>203214_x_at;<br>210559_s_at                                                  | CDK1 (p34)         |                             |                             | 216100_s_at;<br>223930_at                                                 | LAP1                                     |
| 203213_at;<br>203214_x_at;<br>210559_s_at                                                  | CDK1 (p34)         |                             |                             | 218073_s_at                                                               | TMEM48                                   |
| 203213_at;<br>203214_x_at;<br>210559_s_at                                                  | CDK1 (p34)         |                             |                             | 218542_at                                                                 | Cep55                                    |
| 203213_at;<br>203214_x_at;<br>210559_s_at                                                  | CDK1 (p34)         |                             |                             | 218662_s_at                                                               | CAP-G                                    |
| 203213_at;<br>203214_x_at;<br>210559_s_at                                                  | CDK1 (p34)         |                             |                             | 219105_x_at                                                               | ORC6L                                    |
| 203213_at;<br>203214_x_at;<br>210559_s_at                                                  | CDK1 (p34)         |                             |                             | 220355_s_at;<br>223238_s_at;<br>223899_at;<br>223900_s_at;<br>224152_s_at | BAF180                                   |
| 203213_at;<br>203214_x_at;<br>210559_s_at                                                  | CDK1 (p34)         |                             |                             | 221676_s_at                                                               | CORO1C                                   |
| 203213_at;<br>203214_x_at;<br>210559_s_at                                                  | CDK1 (p34)         |                             |                             | 222077_s_at                                                               | RacGAP1                                  |
| 203213_at;<br>203214_x_at;<br>210559_s_at                                                  | CDK1 (p34)         |                             |                             | 222616_s_at                                                               | USP16                                    |
| 203213_at;<br>203214_x_at;<br>210559_s_at                                                  | CDK1 (p34)         |                             |                             | 222903_s_at                                                               | CPEB1                                    |
| 203213_at;                                                                                 | CDK1               |                             |                             | 224731_at                                                                 | HMG1 (amphoterin)                        |

| <b>IDs in active data set</b>                                                              | <b>Object name</b> | <b>miR-128 tgts_miRanda</b> | <b>Transcription Factor</b> | <b>IDs of corresponding network object from GeneGo network</b> | <b>Corresponding network object name</b> |
|--------------------------------------------------------------------------------------------|--------------------|-----------------------------|-----------------------------|----------------------------------------------------------------|------------------------------------------|
| 1552703_s_at;<br>206011_at;<br>209970_x_at;<br>211366_x_at;<br>211367_s_at;<br>211368_s_at | Caspase-1          | x                           |                             | 1552701_a_at;<br>1552703_s_at                                  | Pseudo-ICE                               |
| 203214_x_at;<br>210559_s_at                                                                | (p34)              |                             |                             |                                                                |                                          |
| 203213_at;<br>203214_x_at;<br>210559_s_at                                                  | CDK1<br>(p34)      |                             |                             | 225521_at                                                      | ANAPC7                                   |
| 203213_at;<br>203214_x_at;<br>210559_s_at                                                  | CDK1<br>(p34)      |                             |                             | 225565_at;<br>225572_at                                        | CREB1                                    |
| 203213_at;<br>203214_x_at;<br>210559_s_at                                                  | CDK1<br>(p34)      |                             |                             | 226020_s_at                                                    | DAB1                                     |
| 203213_at;<br>203214_x_at;<br>210559_s_at                                                  | CDK1<br>(p34)      |                             |                             | 226336_at                                                      | Cyclophilin A                            |
| 203213_at;<br>203214_x_at;<br>210559_s_at                                                  | CDK1<br>(p34)      |                             |                             | 227249_at                                                      | NudE                                     |
| 203213_at;<br>203214_x_at;<br>210559_s_at                                                  | CDK1<br>(p34)      |                             |                             | 228131_at                                                      | ERCC-1                                   |
| 203213_at;<br>203214_x_at;<br>210559_s_at                                                  | CDK1<br>(p34)      |                             |                             | 230229_at                                                      | SAP97 (DLG1)                             |
| 203213_at;<br>203214_x_at;<br>210559_s_at                                                  | CDK1<br>(p34)      |                             |                             | 230662_at                                                      | RNF187                                   |
| 203213_at;<br>203214_x_at;<br>210559_s_at                                                  | CDK1<br>(p34)      |                             |                             | 236814_at                                                      | MDM4                                     |
| 203213_at;<br>203214_x_at;<br>210559_s_at                                                  | CDK1<br>(p34)      |                             |                             | 238034_at                                                      | Calnexin                                 |
| 203213_at;<br>203214_x_at;<br>210559_s_at                                                  | CDK1<br>(p34)      |                             |                             | 242918_at                                                      | NASP                                     |
| 204011_at                                                                                  | SPRY2              | x                           |                             | 1554168_a_at;<br>223082_at;<br>235692_at                       | CIN85                                    |
| 204011_at                                                                                  | SPRY2              | x                           |                             | 1565483_at                                                     | EGFR                                     |

| <b>IDs in active data set</b>                                                              | <b>Object name</b> | <b>miR-128 tgts_miRanda</b> | <b>Transcription Factor</b> | <b>IDs of corresponding network object from GeneGo network</b> | <b>Corresponding network object name</b> |
|--------------------------------------------------------------------------------------------|--------------------|-----------------------------|-----------------------------|----------------------------------------------------------------|------------------------------------------|
| 1552703_s_at;<br>206011_at;<br>209970_x_at;<br>211366_x_at;<br>211367_s_at;<br>211368_s_at | Caspase-1          | x                           |                             | 1552701_a_at;<br>1552703_s_at                                  | Pseudo-ICE                               |
| 204011_at                                                                                  | SPRY2              | x                           |                             | 203065_s_at;<br>212097_at                                      | Caveolin-1                               |
| 204011_at                                                                                  | SPRY2              | x                           |                             | 204654_s_at                                                    | AP-2A                                    |
| 204011_at                                                                                  | SPRY2              | x                           |                             | 205286_at                                                      | AP-2C                                    |
| 204011_at                                                                                  | SPRY2              | x                           |                             | 205880_at                                                      | PKC-mu                                   |
| 204011_at                                                                                  | SPRY2              | x                           |                             | 206870_at;<br>223438_s_at;<br>244689_at                        | PPAR-alpha                               |
| 204011_at                                                                                  | SPRY2              | x                           |                             | 209339_at                                                      | SIAH2                                    |
| 204011_at                                                                                  | SPRY2              | x                           |                             | 209682_at                                                      | CBL-B                                    |
| 204011_at                                                                                  | SPRY2              | x                           |                             | 213012_at                                                      | NEDD4                                    |
| 204011_at                                                                                  | SPRY2              | x                           |                             | 213324_at                                                      | c-Src                                    |
| 204011_at                                                                                  | SPRY2              | x                           |                             | 214443_at;<br>214444_s_at;<br>216283_s_at;<br>32699_s_at       | PVR                                      |
| 204011_at                                                                                  | SPRY2              | x                           |                             | 221489_s_at                                                    | SPRY4                                    |
| 204011_at                                                                                  | SPRY2              | x                           |                             | 225565_at;<br>225572_at                                        | CREB1                                    |
| 204011_at                                                                                  | SPRY2              | x                           |                             | 238486_at                                                      | FRS2                                     |
| 204092_s_at;<br>208079_s_at;<br>208080_at                                                  | Aurora-A           |                             |                             | 1553764_a_at;<br>225806_at                                     | Ajuba                                    |
| 204092_s_at;<br>208079_s_at;<br>208080_at                                                  | Aurora-A           |                             |                             | 1565483_at                                                     | EGFR                                     |
| 204092_s_at;<br>208079_s_at;<br>208080_at                                                  | Aurora-A           |                             |                             | 200676_s_at;<br>200684_s_at                                    | UBCH7                                    |
| 204092_s_at;<br>208079_s_at;<br>208080_at                                                  | Aurora-A           |                             |                             | 201502_s_at                                                    | NFKBIA                                   |
| 204092_s_at;<br>208079_s_at;<br>208080_at                                                  | Aurora-A           |                             |                             | 201523_x_at;<br>201524_x_at                                    | E2N(UBC13)                               |
| 204092_s_at;<br>208079_s_at;<br>208080_at                                                  | Aurora-A           |                             |                             | 201853_s_at                                                    | CDC25B                                   |
| 204092_s_at;                                                                               | Aurora-A           |                             |                             | 202149_at;                                                     | CAS-L                                    |

| <b>IDs in active data set</b>                                                              | <b>Object name</b> | <b>miR-128 tgts_miRanda</b> | <b>Transcription Factor</b> | <b>IDs of corresponding network object from GeneGo network</b> | <b>Corresponding network object name</b> |
|--------------------------------------------------------------------------------------------|--------------------|-----------------------------|-----------------------------|----------------------------------------------------------------|------------------------------------------|
| 1552703_s_at;<br>206011_at;<br>209970_x_at;<br>211366_x_at;<br>211367_s_at;<br>211368_s_at | Caspase-1          | x                           |                             | 1552701_a_at;<br>1552703_s_at                                  | Pseudo-ICE                               |
| 208079_s_at;<br>208080_at                                                                  |                    |                             |                             | 202150_s_at                                                    |                                          |
| 204092_s_at;<br>208079_s_at;<br>208080_at                                                  | Aurora-A           |                             |                             | 202240_at                                                      | PLK1                                     |
| 204092_s_at;<br>208079_s_at;<br>208080_at                                                  | Aurora-A           |                             |                             | 202517_at                                                      | CRMP1                                    |
| 204092_s_at;<br>208079_s_at;<br>208080_at                                                  | Aurora-A           |                             |                             | 202580_x_at                                                    | FOXM1                                    |
| 204092_s_at;<br>208079_s_at;<br>208080_at                                                  | Aurora-A           |                             |                             | 202677_at                                                      | p120GAP                                  |
| 204092_s_at;<br>208079_s_at;<br>208080_at                                                  | Aurora-A           |                             |                             | 203010_at                                                      | STAT5A                                   |
| 204092_s_at;<br>208079_s_at;<br>208080_at                                                  | Aurora-A           |                             |                             | 203554_x_at                                                    | Securin                                  |
| 204092_s_at;<br>208079_s_at;<br>208080_at                                                  | Aurora-A           |                             |                             | 203952_at                                                      | ATF-6 alpha                              |
| 204092_s_at;<br>208079_s_at;<br>208080_at                                                  | Aurora-A           |                             |                             | 204162_at                                                      | HEC                                      |
| 204092_s_at;<br>208079_s_at;<br>208080_at                                                  | Aurora-A           |                             |                             | 204901_at;<br>216091_s_at                                      | beta-TrCP                                |
| 204092_s_at;<br>208079_s_at;<br>208080_at                                                  | Aurora-A           |                             |                             | 204962_s_at;<br>210821_x_at                                    | CENP-A                                   |
| 204092_s_at;<br>208079_s_at;<br>208080_at                                                  | Aurora-A           |                             |                             | 205046_at                                                      | CENP-E                                   |
| 204092_s_at;<br>208079_s_at;<br>208080_at                                                  | Aurora-A           |                             |                             | 206846_s_at                                                    | HDAC6                                    |
| 204092_s_at;                                                                               | Aurora-A           |                             |                             | 208093_s_at                                                    | NUDEL                                    |

| <b>IDs in active data set</b>                                                              | <b>Object name</b> | <b>miR-128 tgts_miRanda</b> | <b>Transcription Factor</b> | <b>IDs of corresponding network object from GeneGo network</b> | <b>Corresponding network object name</b> |
|--------------------------------------------------------------------------------------------|--------------------|-----------------------------|-----------------------------|----------------------------------------------------------------|------------------------------------------|
| 1552703_s_at;<br>206011_at;<br>209970_x_at;<br>211366_x_at;<br>211367_s_at;<br>211368_s_at | Caspase-1          | x                           |                             | 1552701_a_at;<br>1552703_s_at                                  | Pseudo-ICE                               |
| 208079_s_at;<br>208080_at                                                                  |                    |                             |                             |                                                                |                                          |
| 204092_s_at;<br>208079_s_at;<br>208080_at                                                  | Aurora-A           |                             |                             | 209341_s_at                                                    | IKK-beta                                 |
| 204092_s_at;<br>208079_s_at;<br>208080_at                                                  | Aurora-A           |                             |                             | 209615_s_at                                                    | PAK1                                     |
| 204092_s_at;<br>208079_s_at;<br>208080_at                                                  | Aurora-A           |                             |                             | 209715_at;<br>212126_at                                        | HP1 alpha                                |
| 204092_s_at;<br>208079_s_at;<br>208080_at                                                  | Aurora-A           |                             |                             | 218580_x_at;<br>225552_x_at;<br>225555_x_at                    | AKIP                                     |
| 204092_s_at;<br>208079_s_at;<br>208080_at                                                  | Aurora-A           |                             |                             | 220145_at;<br>235550_at                                        | ASAP                                     |
| 204092_s_at;<br>208079_s_at;<br>208080_at                                                  | Aurora-A           |                             |                             | 222903_s_at                                                    | CPEB1                                    |
| 204092_s_at;<br>208079_s_at;<br>208080_at                                                  | Aurora-A           |                             |                             | 223981_at                                                      | Ninein                                   |
| 204092_s_at;<br>208079_s_at;<br>208080_at                                                  | Aurora-A           |                             |                             | 224828_at;<br>224829_at                                        | CPEB4                                    |
| 204162_at                                                                                  | HEC                |                             |                             | 1554768_a_at;<br>203362_s_at                                   | MAD2a                                    |
| 204162_at                                                                                  | HEC                |                             |                             | 1555677_s_at;<br>201589_at                                     | SMC1                                     |
| 204162_at                                                                                  | HEC                |                             |                             | 1569061_at;<br>1569062_s_at;<br>229538_s_at;<br>241939_at      | IQGAP3                                   |
| 204162_at                                                                                  | HEC                |                             |                             | 203002_at                                                      | AMOTL2                                   |
| 204162_at                                                                                  | HEC                |                             |                             | 204026_s_at                                                    | HZwint-1                                 |
| 204162_at                                                                                  | HEC                |                             |                             | 204641_at;<br>211080_s_at                                      | Nek2A                                    |
| 204162_at                                                                                  | HEC                |                             |                             | 209002_s_at                                                    | CALCOCO1                                 |

| <b>IDs in active data set</b>                                                              | <b>Object name</b> | <b>miR-128 tgts_miRanda</b> | <b>Transcription Factor</b> | <b>IDs of corresponding network object from GeneGo network</b> | <b>Corresponding network object name</b> |
|--------------------------------------------------------------------------------------------|--------------------|-----------------------------|-----------------------------|----------------------------------------------------------------|------------------------------------------|
| 1552703_s_at;<br>206011_at;<br>209970_x_at;<br>211366_x_at;<br>211367_s_at;<br>211368_s_at | Caspase-1          | x                           |                             | 1552701_a_at;<br>1552703_s_at                                  | Pseudo-ICE                               |
| 204162_at                                                                                  | HEC                |                             |                             | 209891_at                                                      | SPBC25                                   |
| 204162_at                                                                                  | HEC                |                             |                             | 218883_s_at                                                    | CENP-50                                  |
| 204162_at                                                                                  | HEC                |                             |                             | 219409_at                                                      | SNIP1                                    |
| 204162_at                                                                                  | HEC                |                             |                             | 219918_s_at;<br>232238_at                                      | ASPM                                     |
| 204162_at                                                                                  | HEC                |                             |                             | 242163_at                                                      | TRAP150                                  |
| 204162_at                                                                                  | HEC                |                             |                             | 48117_at                                                       | STAF36<br>(CCDC101)                      |
| 204254_s_at;<br>204255_s_at;<br>213692_s_at                                                | VDR                |                             | x                           | 1554251_at;<br>224591_at;<br>224592_x_at                       | HP1-BP74 protein                         |
| 204254_s_at;<br>204255_s_at;<br>213692_s_at                                                | VDR                |                             | x                           | 1556499_s_at;<br>202310_s_at                                   | COL1A1                                   |
| 204254_s_at;<br>204255_s_at;<br>213692_s_at                                                | VDR                |                             | x                           | 1558199_at                                                     | Fibronectin                              |
| 204254_s_at;<br>204255_s_at;<br>213692_s_at                                                | VDR                |                             | x                           | 1568574_x_at                                                   | Osteopontin                              |
| 204254_s_at;<br>204255_s_at;<br>213692_s_at                                                | VDR                |                             | x                           | 200952_s_at;<br>200953_s_at                                    | Cyclin D2                                |
| 204254_s_at;<br>204255_s_at;<br>213692_s_at                                                | VDR                |                             | x                           | 201502_s_at                                                    | NFKBIA                                   |
| 204254_s_at;<br>204255_s_at;<br>213692_s_at                                                | VDR                |                             | x                           | 202599_s_at;<br>202600_s_at                                    | RIP140                                   |
| 204254_s_at;<br>204255_s_at;<br>213692_s_at                                                | VDR                |                             | x                           | 202637_s_at;<br>202638_s_at;<br>215485_s_at                    | ICAM1                                    |
| 204254_s_at;<br>204255_s_at;<br>213692_s_at                                                | VDR                |                             | x                           | 203108_at                                                      | RAIG1                                    |
| 204254_s_at;<br>204255_s_at;<br>213692_s_at                                                | VDR                |                             | x                           | 203183_s_at                                                    | BAF60A                                   |
| 204254_s_at;                                                                               | VDR                |                             | x                           | 204270_at                                                      | Ski                                      |

| <b>IDs in active data set</b>                                                              | <b>Object name</b> | <b>miR-128 tgts_miRanda</b> | <b>Transcription Factor</b> | <b>IDs of corresponding network object from GeneGo network</b> | <b>Corresponding network object name</b> |
|--------------------------------------------------------------------------------------------|--------------------|-----------------------------|-----------------------------|----------------------------------------------------------------|------------------------------------------|
| 1552703_s_at;<br>206011_at;<br>209970_x_at;<br>211366_x_at;<br>211367_s_at;<br>211368_s_at | Caspase-1          | x                           |                             | 1552701_a_at;<br>1552703_s_at                                  | Pseudo-ICE                               |
| 204255_s_at;<br>213692_s_at                                                                |                    |                             |                             |                                                                |                                          |
| 204254_s_at;<br>204255_s_at;<br>213692_s_at                                                | VDR                |                             | x                           | 204626_s_at;<br>204627_s_at;<br>204628_s_at;<br>216261_at      | ITGB3                                    |
| 204254_s_at;<br>204255_s_at;<br>213692_s_at                                                | VDR                |                             | x                           | 204654_s_at                                                    | AP-2A                                    |
| 204254_s_at;<br>204255_s_at;<br>213692_s_at                                                | VDR                |                             | x                           | 204933_s_at                                                    | Osteoprotegerin                          |
| 204254_s_at;<br>204255_s_at;<br>213692_s_at                                                | VDR                |                             | x                           | 205463_s_at;<br>216867_s_at                                    | PDGF-A                                   |
| 204254_s_at;<br>204255_s_at;<br>213692_s_at                                                | VDR                |                             | x                           | 205579_at;<br>205580_s_at                                      | Histamine H1 receptor                    |
| 204254_s_at;<br>204255_s_at;<br>213692_s_at                                                | VDR                |                             | x                           | 205603_s_at;<br>205726_at;<br>217246_s_at                      | HDIA2                                    |
| 204254_s_at;<br>204255_s_at;<br>213692_s_at                                                | VDR                |                             | x                           | 205731_s_at;<br>205732_s_at                                    | NCOA2 (GRIP1/TIF2)                       |
| 204254_s_at;<br>204255_s_at;<br>213692_s_at                                                | VDR                |                             | x                           | 206846_s_at                                                    | HDAC6                                    |
| 204254_s_at;<br>204255_s_at;<br>213692_s_at                                                | VDR                |                             | x                           | 206870_at;<br>223438_s_at;<br>244689_at                        | PPAR-alpha                               |
| 204254_s_at;<br>204255_s_at;<br>213692_s_at                                                | VDR                |                             | x                           | 206877_at;<br>228846_at                                        | MAD                                      |
| 204254_s_at;<br>204255_s_at;<br>213692_s_at                                                | VDR                |                             | x                           | 206925_at                                                      | SIAT8D                                   |
| 204254_s_at;<br>204255_s_at;<br>213692_s_at                                                | VDR                |                             | x                           | 207181_s_at                                                    | Caspase-7                                |



| <b>IDs in active data set</b>                                                              | <b>Object name</b> | <b>miR-128 tgts_miRanda</b> | <b>Transcription Factor</b> | <b>IDs of corresponding network object from GeneGo network</b> | <b>Corresponding network object name</b> |
|--------------------------------------------------------------------------------------------|--------------------|-----------------------------|-----------------------------|----------------------------------------------------------------|------------------------------------------|
| 1552703_s_at;<br>206011_at;<br>209970_x_at;<br>211366_x_at;<br>211367_s_at;<br>211368_s_at | Caspase-1          | x                           |                             | 1552701_a_at;<br>1552703_s_at                                  | Pseudo-ICE                               |
| 204254_s_at;<br>204255_s_at;<br>213692_s_at                                                | VDR                |                             | x                           | 207375_s_at                                                    | IL-15RA                                  |
| 204254_s_at;<br>204255_s_at;<br>213692_s_at                                                | VDR                |                             | x                           | 207992_s_at                                                    | AMD3                                     |
| 204254_s_at;<br>204255_s_at;<br>213692_s_at                                                | VDR                |                             | x                           | 208010_s_at                                                    | 70Z-PEP                                  |
| 204254_s_at;<br>204255_s_at;<br>213692_s_at                                                | VDR                |                             | x                           | 209277_at;<br>209278_s_at                                      | TFPI-2                                   |
| 204254_s_at;<br>204255_s_at;<br>213692_s_at                                                | VDR                |                             | x                           | 209318_x_at                                                    | Zac1                                     |
| 204254_s_at;<br>204255_s_at;<br>213692_s_at                                                | VDR                |                             | x                           | 209363_s_at                                                    | SRB7                                     |
| 204254_s_at;<br>204255_s_at;<br>213692_s_at                                                | VDR                |                             | x                           | 209377_s_at                                                    | HMG3                                     |
| 204254_s_at;<br>204255_s_at;<br>213692_s_at                                                | VDR                |                             | x                           | 210512_s_at;<br>211527_x_at                                    | VEGF-A                                   |
| 204254_s_at;<br>204255_s_at;<br>213692_s_at                                                | VDR                |                             | x                           | 212020_s_at;<br>212021_s_at;<br>212023_s_at                    | Antigen KI-67                            |
| 204254_s_at;<br>204255_s_at;<br>213692_s_at                                                | VDR                |                             | x                           | 212897_at                                                      | CDK11                                    |
| 204254_s_at;<br>204255_s_at;<br>213692_s_at                                                | VDR                |                             | x                           | 213003_s_at                                                    | C/EBPdelta                               |
| 204254_s_at;<br>204255_s_at;<br>213692_s_at                                                | VDR                |                             | x                           | 214744_s_at                                                    | RPL23                                    |
| 204254_s_at;<br>204255_s_at;<br>213692_s_at                                                | VDR                |                             | x                           | 215167_at                                                      | TRAP170                                  |

| <b>IDs in active data set</b>                                                              | <b>Object name</b> | <b>miR-128 tgts_miRanda</b> | <b>Transcription Factor</b> | <b>IDs of corresponding network object from GeneGo network</b> | <b>Corresponding network object name</b> |
|--------------------------------------------------------------------------------------------|--------------------|-----------------------------|-----------------------------|----------------------------------------------------------------|------------------------------------------|
| 1552703_s_at;<br>206011_at;<br>209970_x_at;<br>211366_x_at;<br>211367_s_at;<br>211368_s_at | Caspase-1          | x                           |                             | 1552701_a_at;<br>1552703_s_at                                  | Pseudo-ICE                               |
| 204254_s_at;<br>204255_s_at;<br>213692_s_at                                                | VDR                |                             | x                           | 216705_s_at                                                    | ADA                                      |
| 204254_s_at;<br>204255_s_at;<br>213692_s_at                                                | VDR                |                             | x                           | 217557_s_at                                                    | Carboxypeptidase M                       |
| 204254_s_at;<br>204255_s_at;<br>213692_s_at                                                | VDR                |                             | x                           | 218284_at                                                      | SMAD3                                    |
| 204254_s_at;<br>204255_s_at;<br>213692_s_at                                                | VDR                |                             | x                           | 218832_x_at                                                    | Beta-arrestin1                           |
| 204254_s_at;<br>204255_s_at;<br>213692_s_at                                                | VDR                |                             | x                           | 219249_s_at                                                    | FKBP10                                   |
| 204254_s_at;<br>204255_s_at;<br>213692_s_at                                                | VDR                |                             | x                           | 219318_x_at;<br>236241_at                                      | TRAP18                                   |
| 204254_s_at;<br>204255_s_at;<br>213692_s_at                                                | VDR                |                             | x                           | 220655_at                                                      | ABIN-3                                   |
| 204254_s_at;<br>204255_s_at;<br>213692_s_at                                                | VDR                |                             | x                           | 221218_s_at;<br>223686_at                                      | TPK1                                     |
| 204254_s_at;<br>204255_s_at;<br>213692_s_at                                                | VDR                |                             | x                           | 224221_s_at                                                    | VAV-3                                    |
| 204254_s_at;<br>204255_s_at;<br>213692_s_at                                                | VDR                |                             | x                           | 228131_at                                                      | ERCC-1                                   |
| 204254_s_at;<br>204255_s_at;<br>213692_s_at                                                | VDR                |                             | x                           | 230229_at                                                      | SAP97 (DLG1)                             |
| 204254_s_at;<br>204255_s_at;<br>213692_s_at                                                | VDR                |                             | x                           | 242163_at                                                      | TRAP150                                  |
| 204254_s_at;<br>204255_s_at;<br>213692_s_at                                                | VDR                |                             | x                           | 242707_at                                                      | DRIP130                                  |

| <b>IDs in active data set</b>                                                              | <b>Object name</b> | <b>miR-128 tgts_miRanda</b> | <b>Transcription Factor</b> | <b>IDs of corresponding network object from GeneGo network</b> | <b>Corresponding network object name</b> |
|--------------------------------------------------------------------------------------------|--------------------|-----------------------------|-----------------------------|----------------------------------------------------------------|------------------------------------------|
| 1552703_s_at;<br>206011_at;<br>209970_x_at;<br>211366_x_at;<br>211367_s_at;<br>211368_s_at | Caspase-1          | x                           |                             | 1552701_a_at;<br>1552703_s_at                                  | Pseudo-ICE                               |
| 204254_s_at;<br>204255_s_at;<br>213692_s_at                                                | VDR                |                             | x                           | 242918_at                                                      | NASP                                     |
| 204613_at                                                                                  | PLC-gamma 2        |                             |                             | 1554168_a_at;<br>223082_at;<br>235692_at                       | CIN85                                    |
| 204613_at                                                                                  | PLC-gamma 2        |                             |                             | 1558199_at                                                     | Fibronectin                              |
| 204613_at                                                                                  | PLC-gamma 2        |                             |                             | 1568856_at;<br>1568857_a_at;<br>201383_s_at;<br>201384_s_at    | NBR1                                     |
| 204613_at                                                                                  | PLC-gamma 2        |                             |                             | 200919_at                                                      | EDR2                                     |
| 204613_at                                                                                  | PLC-gamma 2        |                             |                             | 201999_s_at                                                    | Tctex-1                                  |
| 204613_at                                                                                  | PLC-gamma 2        |                             |                             | 203688_at                                                      | Polycystin 2                             |
| 204613_at                                                                                  | PLC-gamma 2        |                             |                             | 204011_at                                                      | SPRY2                                    |
| 204613_at                                                                                  | PLC-gamma 2        |                             |                             | 204162_at                                                      | HEC                                      |
| 204613_at                                                                                  | PLC-gamma 2        |                             |                             | 205812_s_at                                                    | TMED9                                    |
| 204613_at                                                                                  | PLC-gamma 2        |                             |                             | 205880_at                                                      | PKC-mu                                   |
| 204613_at                                                                                  | PLC-gamma 2        |                             |                             | 207112_s_at;<br>225998_at                                      | GAB1                                     |
| 204613_at                                                                                  | PLC-gamma 2        |                             |                             | 209682_at                                                      | CBL-B                                    |
| 204613_at                                                                                  | PLC-gamma 2        |                             |                             | 211005_at                                                      | LAT                                      |
| 204613_at                                                                                  | PLC-gamma 2        |                             |                             | 212118_at                                                      | RFP                                      |
| 204613_at                                                                                  | PLC-gamma 2        |                             |                             | 213324_at                                                      | c-Src                                    |
| 204613_at                                                                                  | PLC-gamma 2        |                             |                             | 213746_s_at;<br>214752_x_at                                    | Filamin A                                |
| 204613_at                                                                                  | PLC-               |                             |                             | 214856_at;                                                     | Beta-fodrin                              |

| <b>IDs in active data set</b>                                                              | <b>Object name</b> | <b>miR-128 tgts_miRanda</b> | <b>Transcription Factor</b> | <b>IDs of corresponding network object from GeneGo network</b> | <b>Corresponding network object name</b> |
|--------------------------------------------------------------------------------------------|--------------------|-----------------------------|-----------------------------|----------------------------------------------------------------|------------------------------------------|
| 1552703_s_at;<br>206011_at;<br>209970_x_at;<br>211366_x_at;<br>211367_s_at;<br>211368_s_at | Caspase-1          | x                           |                             | 1552701_a_at;<br>1552703_s_at                                  | Pseudo-ICE                               |
|                                                                                            | gamma 2            |                             |                             | 215918_s_at                                                    |                                          |
| 204613_at                                                                                  | PLC-gamma 2        |                             |                             | 221581_s_at                                                    | WBSCR5(NTAL)                             |
| 204613_at                                                                                  | PLC-gamma 2        |                             |                             | 224366_s_at                                                    | REPS1                                    |
| 204613_at                                                                                  | PLC-gamma 2        |                             |                             | 232097_at                                                      | TOX4                                     |
| 204901_at;<br>216091_s_at                                                                  | beta-TrCP          |                             |                             | 1554086_at                                                     | TUBGCP3                                  |
| 204901_at;<br>216091_s_at                                                                  | beta-TrCP          |                             |                             | 1558199_at                                                     | Fibronectin                              |
| 204901_at;<br>216091_s_at                                                                  | beta-TrCP          |                             |                             | 200711_s_at;<br>200719_at                                      | SKP1                                     |
| 204901_at;<br>216091_s_at                                                                  | beta-TrCP          |                             |                             | 201502_s_at                                                    | NFKBIA                                   |
| 204901_at;<br>216091_s_at                                                                  | beta-TrCP          |                             |                             | 201840_at                                                      | NEDD8                                    |
| 204901_at;<br>216091_s_at                                                                  | beta-TrCP          |                             |                             | 201939_at                                                      | PLK2                                     |
| 204901_at;<br>216091_s_at                                                                  | beta-TrCP          |                             |                             | 202196_s_at                                                    | DKK3                                     |
| 204901_at;<br>216091_s_at                                                                  | beta-TrCP          |                             |                             | 203554_x_at                                                    | Securin                                  |
| 204901_at;<br>216091_s_at                                                                  | beta-TrCP          |                             |                             | 204191_at                                                      | IFNAR1                                   |
| 204901_at;<br>216091_s_at                                                                  | beta-TrCP          |                             |                             | 204535_s_at                                                    | NRSF                                     |
| 204901_at;<br>216091_s_at                                                                  | beta-TrCP          |                             |                             | 204809_at;<br>223507_at                                        | ClpX                                     |
| 204901_at;<br>216091_s_at                                                                  | beta-TrCP          |                             |                             | 208370_s_at                                                    | Calcipressin 1                           |
| 204901_at;<br>216091_s_at                                                                  | beta-TrCP          |                             |                             | 208518_s_at                                                    | PER2                                     |
| 204901_at;<br>216091_s_at                                                                  | beta-TrCP          |                             |                             | 209341_s_at                                                    | IKK-beta                                 |
| 204901_at;<br>216091_s_at                                                                  | beta-TrCP          |                             |                             | 211764_s_at;<br>214590_s_at                                    | UBE2D1                                   |
| 204901_at;<br>216091_s_at                                                                  | beta-TrCP          |                             |                             | 212533_at                                                      | Wee1                                     |

| <b>IDs in active data set</b>                                                              | <b>Object name</b> | <b>miR-128 tgts_miRanda</b> | <b>Transcription Factor</b> | <b>IDs of corresponding network object from GeneGo network</b> | <b>Corresponding network object name</b> |
|--------------------------------------------------------------------------------------------|--------------------|-----------------------------|-----------------------------|----------------------------------------------------------------|------------------------------------------|
| 1552703_s_at;<br>206011_at;<br>209970_x_at;<br>211366_x_at;<br>211367_s_at;<br>211368_s_at | Caspase-1          | x                           |                             | 1552701_a_at;<br>1552703_s_at                                  | Pseudo-ICE                               |
| 204901_at;<br>216091_s_at                                                                  | beta-TrCP          |                             |                             | 212594_at                                                      | PDCD4                                    |
| 204901_at;<br>216091_s_at                                                                  | beta-TrCP          |                             |                             | 218284_at                                                      | SMAD3                                    |
| 204901_at;<br>216091_s_at                                                                  | beta-TrCP          |                             |                             | 222749_at                                                      | SUFU                                     |
| 204901_at;<br>216091_s_at                                                                  | beta-TrCP          |                             |                             | 223679_at                                                      | Beta-catenin                             |
| 204901_at;<br>216091_s_at                                                                  | beta-TrCP          |                             |                             | 224889_at;<br>231548_at                                        | FOXO3A                                   |
| 204901_at;<br>216091_s_at                                                                  | beta-TrCP          |                             |                             | 225131_at;<br>225138_at                                        | TRABID                                   |
| 204901_at;<br>216091_s_at                                                                  | beta-TrCP          |                             |                             | 229422_at                                                      | Nardilysin                               |
| 204901_at;<br>216091_s_at                                                                  | beta-TrCP          |                             |                             | 230229_at                                                      | SAP97 (DLG1)                             |
| 204901_at;<br>216091_s_at                                                                  | beta-TrCP          |                             |                             | 230280_at                                                      | TRIM9                                    |
| 204962_s_at;<br>210821_x_at                                                                | CENP-A             |                             |                             | 200919_at                                                      | EDR2                                     |
| 204962_s_at;<br>210821_x_at                                                                | CENP-A             |                             |                             | 202580_x_at                                                    | FOXM1                                    |
| 204962_s_at;<br>210821_x_at                                                                | CENP-A             |                             |                             | 203975_s_at;<br>229808_at                                      | ChAF1 subunit A                          |
| 204962_s_at;<br>210821_x_at                                                                | CENP-A             |                             |                             | 204739_at                                                      | CENP-C                                   |
| 204962_s_at;<br>210821_x_at                                                                | CENP-A             |                             |                             | 204752_x_at;<br>215773_x_at                                    | PARP-2                                   |
| 204962_s_at;<br>210821_x_at                                                                | CENP-A             |                             |                             | 205603_s_at;<br>205726_at;<br>217246_s_at                      | HDIA2                                    |
| 204962_s_at;<br>210821_x_at                                                                | CENP-A             |                             |                             | 207590_s_at;<br>214804_at                                      | CENP-I (FSHPRH1)                         |
| 204962_s_at;<br>210821_x_at                                                                | CENP-A             |                             |                             | 208371_s_at                                                    | RING1                                    |
| 204962_s_at;<br>210821_x_at                                                                | CENP-A             |                             |                             | 208597_at                                                      | ZFP91                                    |
| 204962_s_at;<br>210821_x_at                                                                | CENP-A             |                             |                             | 209715_at;<br>212126_at                                        | HP1 alpha                                |

| <b>IDs in active data set</b>                                                              | <b>Object name</b> | <b>miR-128 tgts_miRanda</b> | <b>Transcription Factor</b> | <b>IDs of corresponding network object from GeneGo network</b>            | <b>Corresponding network object name</b> |
|--------------------------------------------------------------------------------------------|--------------------|-----------------------------|-----------------------------|---------------------------------------------------------------------------|------------------------------------------|
| 1552703_s_at;<br>206011_at;<br>209970_x_at;<br>211366_x_at;<br>211367_s_at;<br>211368_s_at | Caspase-1          | x                           |                             | 1552701_a_at;<br>1552703_s_at                                             | Pseudo-ICE                               |
| 204962_s_at;<br>210821_x_at                                                                | CENP-A             |                             |                             | 214500_at;<br>214501_s_at                                                 | Macro-H2A.1 histone                      |
| 204962_s_at;<br>210821_x_at                                                                | CENP-A             |                             |                             | 218726_at                                                                 | HJURP                                    |
| 204962_s_at;<br>210821_x_at                                                                | CENP-A             |                             |                             | 218883_s_at                                                               | CENP-50                                  |
| 204962_s_at;<br>210821_x_at                                                                | CENP-A             |                             |                             | 222077_s_at                                                               | RacGAP1                                  |
| 204962_s_at;<br>210821_x_at                                                                | CENP-A             |                             |                             | 225396_at;<br>237333_at;<br>244872_at                                     | RBBP4 (RbAp48)                           |
| 204962_s_at;<br>210821_x_at                                                                | CENP-A             |                             |                             | 229630_s_at                                                               | WTAP                                     |
| 205046_at                                                                                  | CENP-E             |                             |                             | 200711_s_at;<br>200719_at                                                 | SKP1                                     |
| 205046_at                                                                                  | CENP-E             |                             |                             | 200726_at                                                                 | PP1-cat gamma                            |
| 205046_at                                                                                  | CENP-E             |                             |                             | 202240_at                                                                 | PLK1                                     |
| 205046_at                                                                                  | CENP-E             |                             |                             | 204162_at                                                                 | HEC                                      |
| 205046_at                                                                                  | CENP-E             |                             |                             | 204962_s_at;<br>210821_x_at                                               | CENP-A                                   |
| 205046_at                                                                                  | CENP-E             |                             |                             | 207828_s_at;<br>209172_s_at                                               | CENP-F                                   |
| 205046_at                                                                                  | CENP-E             |                             |                             | 220355_s_at;<br>223238_s_at;<br>223899_at;<br>223900_s_at;<br>224152_s_at | BAF180                                   |
| 205046_at                                                                                  | CENP-E             |                             |                             | 221258_s_at                                                               | KIF18A                                   |
| 205046_at                                                                                  | CENP-E             |                             |                             | 244508_at                                                                 | Septin 7                                 |
| 205176_s_at                                                                                | NRIF3              |                             | x                           | 201124_at                                                                 | ITGB5                                    |
| 205176_s_at                                                                                | NRIF3              |                             | x                           | 203368_at                                                                 | CRELD1                                   |
| 205176_s_at                                                                                | NRIF3              |                             | x                           | 204109_s_at;<br>228433_at                                                 | NFYA                                     |
| 205176_s_at                                                                                | NRIF3              |                             | x                           | 204626_s_at;<br>204627_s_at;<br>204628_s_at;<br>216261_at                 | ITGB3                                    |
| 205176_s_at                                                                                | NRIF3              |                             | x                           | 204760_s_at;<br>31637_s_at                                                | TR-alpha                                 |

| <b>IDs in active data set</b>                                                              | <b>Object name</b> | <b>miR-128 tgts_miRanda</b> | <b>Transcription Factor</b> | <b>IDs of corresponding network object from GeneGo network</b> | <b>Corresponding network object name</b> |
|--------------------------------------------------------------------------------------------|--------------------|-----------------------------|-----------------------------|----------------------------------------------------------------|------------------------------------------|
| 1552703_s_at;<br>206011_at;<br>209970_x_at;<br>211366_x_at;<br>211367_s_at;<br>211368_s_at | Caspase-1          | x                           |                             | 1552701_a_at;<br>1552703_s_at                                  | Pseudo-ICE                               |
| 205176_s_at                                                                                | NRIF3              |                             | x                           | 204962_s_at;<br>210821_x_at                                    | CENP-A                                   |
| 205176_s_at                                                                                | NRIF3              |                             | x                           | 205425_at                                                      | HIP1                                     |
| 205176_s_at                                                                                | NRIF3              |                             | x                           | 206665_s_at;<br>212312_at                                      | Bel-XL                                   |
| 205176_s_at                                                                                | NRIF3              |                             | x                           | 211995_x_at;<br>212988_x_at                                    | Actin cytoplasmic 2                      |
| 205176_s_at                                                                                | NRIF3              |                             | x                           | 213226_at                                                      | Cyclin A2                                |
| 205176_s_at                                                                                | NRIF3              |                             | x                           | 223042_s_at                                                    | FUNDC2                                   |
| 205176_s_at                                                                                | NRIF3              |                             | x                           | 233781_s_at                                                    | RIF1                                     |
| 205176_s_at                                                                                | NRIF3              |                             | x                           | 238555_at                                                      | MRPS31                                   |
| 206536_s_at;<br>225859_at                                                                  | XIAP               |                             |                             | 201523_x_at;<br>201524_x_at                                    | E2N(UBC13)                               |
| 206536_s_at;<br>225859_at                                                                  | XIAP               |                             |                             | 202094_at;<br>202095_s_at                                      | Survivin                                 |
| 206536_s_at;<br>225859_at                                                                  | XIAP               |                             |                             | 202672_s_at                                                    | ATF-3                                    |
| 206536_s_at;<br>225859_at                                                                  | XIAP               |                             |                             | 202901_x_at;<br>202902_s_at                                    | Cathepsin S                              |
| 206536_s_at;<br>225859_at                                                                  | XIAP               |                             |                             | 203010_at                                                      | STAT5A                                   |
| 206536_s_at;<br>225859_at                                                                  | XIAP               |                             |                             | 203065_s_at;<br>212097_at                                      | Caveolin-1                               |
| 206536_s_at;<br>225859_at                                                                  | XIAP               |                             |                             | 203564_at                                                      | FANCG                                    |
| 206536_s_at;<br>225859_at                                                                  | XIAP               |                             |                             | 205209_at;<br>208218_s_at;<br>208223_s_at;<br>213198_at        | ALK-4                                    |
| 206536_s_at;<br>225859_at                                                                  | XIAP               |                             |                             | 207181_s_at                                                    | Caspase-7                                |
| 206536_s_at;<br>225859_at                                                                  | XIAP               |                             |                             | 211711_s_at;<br>242622_x_at                                    | PTEN                                     |
| 206536_s_at;<br>225859_at                                                                  | XIAP               |                             |                             | 211764_s_at;<br>214590_s_at                                    | UBE2D1                                   |
| 206536_s_at;<br>225859_at                                                                  | XIAP               |                             |                             | 213596_at                                                      | Caspase-4                                |
| 206536_s_at;<br>225859_at                                                                  | XIAP               |                             |                             | 215606_s_at                                                    | ELKS                                     |

| <b>IDs in active data set</b>                                                              | <b>Object name</b> | <b>miR-128 tgts_miRanda</b> | <b>Transcription Factor</b> | <b>IDs of corresponding network object from GeneGo network</b> | <b>Corresponding network object name</b> |
|--------------------------------------------------------------------------------------------|--------------------|-----------------------------|-----------------------------|----------------------------------------------------------------|------------------------------------------|
| 1552703_s_at;<br>206011_at;<br>209970_x_at;<br>211366_x_at;<br>211367_s_at;<br>211368_s_at | Caspase-1          | x                           |                             | 1552701_a_at;<br>1552703_s_at                                  | Pseudo-ICE                               |
| 206536_s_at;<br>225859_at                                                                  | XIAP               |                             |                             | 217542_at                                                      | MDM2                                     |
| 206536_s_at;<br>225859_at                                                                  | XIAP               |                             |                             | 218837_s_at                                                    | UBE2D4                                   |
| 206536_s_at;<br>225859_at                                                                  | XIAP               |                             |                             | 221695_s_at;<br>226979_at                                      | MAP3K2 (MEKK2)                           |
| 206536_s_at;<br>225859_at                                                                  | XIAP               |                             |                             | 225276_at                                                      | GSPT1                                    |
| 206536_s_at;<br>225859_at                                                                  | XIAP               |                             |                             | 225651_at                                                      | UBE2E2                                   |
| 206536_s_at;<br>225859_at                                                                  | XIAP               |                             |                             | 227625_s_at                                                    | CHIP                                     |
| 207714_s_at                                                                                | HSP47              | x                           |                             | 1554168_a_at;<br>223082_at;<br>235692_at                       | CIN85                                    |
| 207714_s_at                                                                                | HSP47              | x                           |                             | 1555832_s_at                                                   | KLF6                                     |
| 207714_s_at                                                                                | HSP47              | x                           |                             | 1556499_s_at;<br>202310_s_at                                   | COL1A1                                   |
| 207714_s_at                                                                                | HSP47              | x                           |                             | 201087_at;<br>211823_s_at                                      | Paxillin                                 |
| 207714_s_at                                                                                | HSP47              | x                           |                             | 202241_at;<br>235641_at                                        | C8FW (GIG2)                              |
| 207714_s_at                                                                                | HSP47              | x                           |                             | 208423_s_at;<br>211887_x_at                                    | 08p22/MSR1(CD204)                        |
| 207714_s_at                                                                                | HSP47              | x                           |                             | 208991_at;<br>208992_s_at;<br>225289_at                        | STAT3                                    |
| 207714_s_at                                                                                | HSP47              | x                           |                             | 211736_at                                                      | SP2                                      |
| 207714_s_at                                                                                | HSP47              | x                           |                             | 214534_at                                                      | Histone H1b                              |
| 207714_s_at                                                                                | HSP47              | x                           |                             | 214881_s_at                                                    | UBF                                      |
| 207714_s_at                                                                                | HSP47              | x                           |                             | 221019_s_at                                                    | COLEC12                                  |
| 208939_at                                                                                  | SEPHS1             |                             |                             | 1553167_a_at;<br>231730_at;<br>235516_at                       | SLA/LP                                   |
| 208939_at                                                                                  | SEPHS1             |                             |                             | 202269_x_at;<br>231577_s_at                                    | GBP1                                     |
| 208939_at                                                                                  | SEPHS1             |                             |                             | 202517_at                                                      | CRMP1                                    |
| 208939_at                                                                                  | SEPHS1             |                             |                             | 202748_at                                                      | GBP2                                     |
| 208939_at                                                                                  | SEPHS1             |                             |                             | 203455_s_at;                                                   | SSAT                                     |



| <b>IDs in active data set</b>                                                              | <b>Object name</b> | <b>miR-128 tgts_miRanda</b> | <b>Transcription Factor</b> | <b>IDs of corresponding network object from GeneGo network</b> | <b>Corresponding network object name</b> |
|--------------------------------------------------------------------------------------------|--------------------|-----------------------------|-----------------------------|----------------------------------------------------------------|------------------------------------------|
| 1552703_s_at;<br>206011_at;<br>209970_x_at;<br>211366_x_at;<br>211367_s_at;<br>211368_s_at | Caspase-1          | x                           |                             | 1552701_a_at;<br>1552703_s_at                                  | Pseudo-ICE                               |
|                                                                                            |                    |                             |                             | 210592_s_at;<br>213988_s_at                                    |                                          |
| 208939_at                                                                                  | SEPHS1             |                             |                             | 210654_at;<br>227345_at                                        | TRUNDD(TNFRSF10D)                        |
| 208939_at                                                                                  | SEPHS1             |                             |                             | 217871_s_at                                                    | MIF                                      |
| 208991_at;<br>208992_s_at;<br>225289_at                                                    | STAT3              |                             | x                           | 1553032_at;<br>1555431_a_at;<br>243541_at                      | IL-31RA                                  |
| 208991_at;<br>208992_s_at;<br>225289_at                                                    | STAT3              |                             | x                           | 1558233_s_at;<br>1565269_s_at                                  | ATF-1                                    |
| 208991_at;<br>208992_s_at;<br>225289_at                                                    | STAT3              |                             | x                           | 1558662_s_at;<br>222915_s_at                                   | BANK                                     |
| 208991_at;<br>208992_s_at;<br>225289_at                                                    | STAT3              |                             | x                           | 1561054_a_at                                                   | CCDC14                                   |
| 208991_at;<br>208992_s_at;<br>225289_at                                                    | STAT3              |                             | x                           | 1567223_at;<br>1567224_at                                      | HMGA2                                    |
| 208991_at;<br>208992_s_at;<br>225289_at                                                    | STAT3              |                             | x                           | 1568574_x_at                                                   | Osteopontin                              |
| 208991_at;<br>208992_s_at;<br>225289_at                                                    | STAT3              |                             | x                           | 1568765_at;<br>202627_s_at;<br>202628_s_at                     | PAI1                                     |
| 208991_at;<br>208992_s_at;<br>225289_at                                                    | STAT3              |                             | x                           | 1598_g_at                                                      | Gas6                                     |
| 208991_at;<br>208992_s_at;<br>225289_at                                                    | STAT3              |                             | x                           | 200658_s_at                                                    | Prohibitin                               |
| 208991_at;<br>208992_s_at;<br>225289_at                                                    | STAT3              |                             | x                           | 200783_s_at                                                    | Stathmin                                 |
| 208991_at;<br>208992_s_at;<br>225289_at                                                    | STAT3              |                             | x                           | 201487_at;<br>225647_s_at                                      | Cathepsin C                              |
| 208991_at;                                                                                 | STAT3              |                             | x                           | 201666_at                                                      | TIMP1                                    |

| <b>IDs in active data set</b>                                                              | <b>Object name</b> | <b>miR-128 tgts_miRanda</b> | <b>Transcription Factor</b> | <b>IDs of corresponding network object from GeneGo network</b> | <b>Corresponding network object name</b> |
|--------------------------------------------------------------------------------------------|--------------------|-----------------------------|-----------------------------|----------------------------------------------------------------|------------------------------------------|
| 1552703_s_at;<br>206011_at;<br>209970_x_at;<br>211366_x_at;<br>211367_s_at;<br>211368_s_at | Caspase-1          | x                           |                             | 1552701_a_at;<br>1552703_s_at                                  | Pseudo-ICE                               |
| 208992_s_at;<br>225289_at                                                                  |                    |                             |                             |                                                                |                                          |
| 208991_at;<br>208992_s_at;<br>225289_at                                                    | STAT3              |                             | x                           | 201693_s_at;<br>201694_s_at;<br>227404_s_at                    | EGR1                                     |
| 208991_at;<br>208992_s_at;<br>225289_at                                                    | STAT3              |                             | x                           | 201841_s_at                                                    | HSP27                                    |
| 208991_at;<br>208992_s_at;<br>225289_at                                                    | STAT3              |                             | x                           | 202057_at                                                      | Karyopherin alpha 1                      |
| 208991_at;<br>208992_s_at;<br>225289_at                                                    | STAT3              |                             | x                           | 202060_at                                                      | CTR9                                     |
| 208991_at;<br>208992_s_at;<br>225289_at                                                    | STAT3              |                             | x                           | 202090_s_at                                                    | UQCR11                                   |
| 208991_at;<br>208992_s_at;<br>225289_at                                                    | STAT3              |                             | x                           | 202092_s_at                                                    | BART1                                    |
| 208991_at;<br>208992_s_at;<br>225289_at                                                    | STAT3              |                             | x                           | 202094_at;<br>202095_s_at                                      | Survivin                                 |
| 208991_at;<br>208992_s_at;<br>225289_at                                                    | STAT3              |                             | x                           | 202580_x_at                                                    | FOXM1                                    |
| 208991_at;<br>208992_s_at;<br>225289_at                                                    | STAT3              |                             | x                           | 202637_s_at;<br>202638_s_at;<br>215485_s_at                    | ICAM1                                    |
| 208991_at;<br>208992_s_at;<br>225289_at                                                    | STAT3              |                             | x                           | 202748_at                                                      | GBP2                                     |
| 208991_at;<br>208992_s_at;<br>225289_at                                                    | STAT3              |                             | x                           | 202833_s_at;<br>211429_s_at                                    | Alpha 1-antitrypsin                      |
| 208991_at;<br>208992_s_at;<br>225289_at                                                    | STAT3              |                             | x                           | 203065_s_at;<br>212097_at                                      | Caveolin-1                               |
| 208991_at;                                                                                 | STAT3              |                             | x                           | 203373_at                                                      | SOCS2                                    |

| <b>IDs in active data set</b>                                                              | <b>Object name</b> | <b>miR-128 tgts_miRanda</b> | <b>Transcription Factor</b> | <b>IDs of corresponding network object from GeneGo network</b> | <b>Corresponding network object name</b> |
|--------------------------------------------------------------------------------------------|--------------------|-----------------------------|-----------------------------|----------------------------------------------------------------|------------------------------------------|
| 1552703_s_at;<br>206011_at;<br>209970_x_at;<br>211366_x_at;<br>211367_s_at;<br>211368_s_at | Caspase-1          | x                           |                             | 1552701_a_at;<br>1552703_s_at                                  | Pseudo-ICE                               |
| 208992_s_at;<br>225289_at                                                                  |                    |                             |                             |                                                                |                                          |
| 208991_at;<br>208992_s_at;<br>225289_at                                                    | STAT3              |                             | x                           | 203964_at                                                      | NMI                                      |
| 208991_at;<br>208992_s_at;<br>225289_at                                                    | STAT3              |                             | x                           | 204191_at                                                      | IFNAR1                                   |
| 208991_at;<br>208992_s_at;<br>225289_at                                                    | STAT3              |                             | x                           | 204435_at;<br>223984_s_at                                      | NUP58                                    |
| 208991_at;<br>208992_s_at;<br>225289_at                                                    | STAT3              |                             | x                           | 204455_at                                                      | BPAG1                                    |
| 208991_at;<br>208992_s_at;<br>225289_at                                                    | STAT3              |                             | x                           | 204535_s_at                                                    | NRSF                                     |
| 208991_at;<br>208992_s_at;<br>225289_at                                                    | STAT3              |                             | x                           | 204557_s_at                                                    | DZIP                                     |
| 208991_at;<br>208992_s_at;<br>225289_at                                                    | STAT3              |                             | x                           | 204662_at                                                      | CP110                                    |
| 208991_at;<br>208992_s_at;<br>225289_at                                                    | STAT3              |                             | x                           | 205798_at                                                      | IL7RA                                    |
| 208991_at;<br>208992_s_at;<br>225289_at                                                    | STAT3              |                             | x                           | 205805_s_at                                                    | ROR1                                     |
| 208991_at;<br>208992_s_at;<br>225289_at                                                    | STAT3              |                             | x                           | 205945_at                                                      | IL6RA                                    |
| 208991_at;<br>208992_s_at;<br>225289_at                                                    | STAT3              |                             | x                           | 206412_at                                                      | Fer                                      |
| 208991_at;<br>208992_s_at;<br>225289_at                                                    | STAT3              |                             | x                           | 206665_s_at;<br>212312_at                                      | Bcl-XL                                   |
| 208991_at;                                                                                 | STAT3              |                             | x                           | 207980_s_at;                                                   | CITED2                                   |

| <b>IDs in active data set</b>                                                              | <b>Object name</b> | <b>miR-128 tgts_miRanda</b> | <b>Transcription Factor</b> | <b>IDs of corresponding network object from GeneGo network</b> | <b>Corresponding network object name</b> |
|--------------------------------------------------------------------------------------------|--------------------|-----------------------------|-----------------------------|----------------------------------------------------------------|------------------------------------------|
| 1552703_s_at;<br>206011_at;<br>209970_x_at;<br>211366_x_at;<br>211367_s_at;<br>211368_s_at | Caspase-1          | x                           |                             | 1552701_a_at;<br>1552703_s_at                                  | Pseudo-ICE                               |
| 208992_s_at;<br>225289_at                                                                  |                    |                             |                             | 209357_at                                                      |                                          |
| 208991_at;<br>208992_s_at;<br>225289_at                                                    | STAT3              |                             | x                           | 208607_s_at;<br>214456_x_at                                    | SAA1                                     |
| 208991_at;<br>208992_s_at;<br>225289_at                                                    | STAT3              |                             | x                           | 208607_s_at;<br>214456_x_at                                    | SAA2                                     |
| 208991_at;<br>208992_s_at;<br>225289_at                                                    | STAT3              |                             | x                           | 208920_at                                                      | Sorcin                                   |
| 208991_at;<br>208992_s_at;<br>225289_at                                                    | STAT3              |                             | x                           | 209270_at                                                      | LAMB3                                    |
| 208991_at;<br>208992_s_at;<br>225289_at                                                    | STAT3              |                             | x                           | 209339_at                                                      | SIAH2                                    |
| 208991_at;<br>208992_s_at;<br>225289_at                                                    | STAT3              |                             | x                           | 209341_s_at                                                    | IKK-beta                                 |
| 208991_at;<br>208992_s_at;<br>225289_at                                                    | STAT3              |                             | x                           | 209466_x_at;<br>211737_x_at                                    | Pleiotrophin (OSF1)                      |
| 208991_at;<br>208992_s_at;<br>225289_at                                                    | STAT3              |                             | x                           | 209589_s_at                                                    | Ephrin-B receptor 2                      |
| 208991_at;<br>208992_s_at;<br>225289_at                                                    | STAT3              |                             | x                           | 209925_at                                                      | Occludin                                 |
| 208991_at;<br>208992_s_at;<br>225289_at                                                    | STAT3              |                             | x                           | 210294_at                                                      | Tapasin                                  |
| 208991_at;<br>208992_s_at;<br>225289_at                                                    | STAT3              |                             | x                           | 210449_x_at;<br>211561_x_at                                    | p38alpha (MAPK14)                        |
| 208991_at;<br>208992_s_at;<br>225289_at                                                    | STAT3              |                             | x                           | 210477_x_at;<br>226048_at                                      | JNK1(MAPK8)                              |
| 208991_at;                                                                                 | STAT3              |                             | x                           | 210512_s_at;                                                   | VEGF-A                                   |

| <b>IDs in active data set</b>                                                              | <b>Object name</b> | <b>miR-128 tgts_miRanda</b> | <b>Transcription Factor</b> | <b>IDs of corresponding network object from GeneGo network</b> | <b>Corresponding network object name</b> |
|--------------------------------------------------------------------------------------------|--------------------|-----------------------------|-----------------------------|----------------------------------------------------------------|------------------------------------------|
| 1552703_s_at;<br>206011_at;<br>209970_x_at;<br>211366_x_at;<br>211367_s_at;<br>211368_s_at | Caspase-1          | x                           |                             | 1552701_a_at;<br>1552703_s_at                                  | Pseudo-ICE                               |
| 208992_s_at;<br>225289_at                                                                  |                    |                             |                             | 211527_x_at                                                    |                                          |
| 208991_at;<br>208992_s_at;<br>225289_at                                                    | STAT3              |                             | x                           | 211148_s_at                                                    | Angiopoietin 2                           |
| 208991_at;<br>208992_s_at;<br>225289_at                                                    | STAT3              |                             | x                           | 211354_s_at;<br>211355_x_at;<br>211356_x_at                    | Leptin receptor                          |
| 208991_at;<br>208992_s_at;<br>225289_at                                                    | STAT3              |                             | x                           | 211506_s_at                                                    | IL-8                                     |
| 208991_at;<br>208992_s_at;<br>225289_at                                                    | STAT3              |                             | x                           | 212218_s_at                                                    | FASN                                     |
| 208991_at;<br>208992_s_at;<br>225289_at                                                    | STAT3              |                             | x                           | 212533_at                                                      | Wee1                                     |
| 208991_at;<br>208992_s_at;<br>225289_at                                                    | STAT3              |                             | x                           | 213003_s_at                                                    | C/EBPdelta                               |
| 208991_at;<br>208992_s_at;<br>225289_at                                                    | STAT3              |                             | x                           | 213324_at                                                      | c-Src                                    |
| 208991_at;<br>208992_s_at;<br>225289_at                                                    | STAT3              |                             | x                           | 213852_at;<br>217856_at                                        | RBM8 (Y14)                               |
| 208991_at;<br>208992_s_at;<br>225289_at                                                    | STAT3              |                             | x                           | 213972_at                                                      | FoxD1                                    |
| 208991_at;<br>208992_s_at;<br>225289_at                                                    | STAT3              |                             | x                           | 214015_at;<br>226572_at;<br>228662_at                          | SOCS7                                    |
| 208991_at;<br>208992_s_at;<br>225289_at                                                    | STAT3              |                             | x                           | 214073_at                                                      | Cortactin                                |
| 208991_at;<br>208992_s_at;<br>225289_at                                                    | STAT3              |                             | x                           | 214462_at;<br>227542_at                                        | SOCS6                                    |
| 208991_at;                                                                                 | STAT3              |                             | x                           | 214856_at;                                                     | Beta-fodrin                              |

| <b>IDs in active data set</b>                                                              | <b>Object name</b> | <b>miR-128 tgts_miRanda</b> | <b>Transcription Factor</b> | <b>IDs of corresponding network object from GeneGo network</b> | <b>Corresponding network object name</b> |
|--------------------------------------------------------------------------------------------|--------------------|-----------------------------|-----------------------------|----------------------------------------------------------------|------------------------------------------|
| 1552703_s_at;<br>206011_at;<br>209970_x_at;<br>211366_x_at;<br>211367_s_at;<br>211368_s_at | Caspase-1          | x                           |                             | 1552701_a_at;<br>1552703_s_at                                  | Pseudo-ICE                               |
| 208992_s_at;<br>225289_at                                                                  |                    |                             |                             | 215918_s_at                                                    |                                          |
| 208991_at;<br>208992_s_at;<br>225289_at                                                    | STAT3              |                             | x                           | 214948_s_at                                                    | TMF1                                     |
| 208991_at;<br>208992_s_at;<br>225289_at                                                    | STAT3              |                             | x                           | 217192_s_at;<br>228964_at                                      | BLIMP1 (PRDI-BF1)                        |
| 208991_at;<br>208992_s_at;<br>225289_at                                                    | STAT3              |                             | x                           | 219179_at                                                      | DACT1                                    |
| 208991_at;<br>208992_s_at;<br>225289_at                                                    | STAT3              |                             | x                           | 220038_at                                                      | SGK3                                     |
| 208991_at;<br>208992_s_at;<br>225289_at                                                    | STAT3              |                             | x                           | 220266_s_at                                                    | KLF4                                     |
| 208991_at;<br>208992_s_at;<br>225289_at                                                    | STAT3              |                             | x                           | 221218_s_at;<br>223686_at                                      | TPK1                                     |
| 208991_at;<br>208992_s_at;<br>225289_at                                                    | STAT3              |                             | x                           | 221287_at;<br>229285_at                                        | RNaseL                                   |
| 208991_at;<br>208992_s_at;<br>225289_at                                                    | STAT3              |                             | x                           | 221685_s_at                                                    | CCDC99                                   |
| 208991_at;<br>208992_s_at;<br>225289_at                                                    | STAT3              |                             | x                           | 222077_s_at                                                    | RacGAP1                                  |
| 208991_at;<br>208992_s_at;<br>225289_at                                                    | STAT3              |                             | x                           | 222539_at                                                      | CLN6                                     |
| 208991_at;<br>208992_s_at;<br>225289_at                                                    | STAT3              |                             | x                           | 222557_at                                                      | Stathmin 3                               |
| 208991_at;<br>208992_s_at;<br>225289_at                                                    | STAT3              |                             | x                           | 223158_s_at                                                    | NEK6                                     |
| 208991_at;                                                                                 | STAT3              |                             | x                           | 223679_at                                                      | Beta-catenin                             |

| <b>IDs in active data set</b>                                                              | <b>Object name</b> | <b>miR-128 tgts_miRanda</b> | <b>Transcription Factor</b> | <b>IDs of corresponding network object from GeneGo network</b> | <b>Corresponding network object name</b> |
|--------------------------------------------------------------------------------------------|--------------------|-----------------------------|-----------------------------|----------------------------------------------------------------|------------------------------------------|
| 1552703_s_at;<br>206011_at;<br>209970_x_at;<br>211366_x_at;<br>211367_s_at;<br>211368_s_at | Caspase-1          | x                           |                             | 1552701_a_at;<br>1552703_s_at                                  | Pseudo-ICE                               |
| 208992_s_at;<br>225289_at                                                                  |                    |                             |                             |                                                                |                                          |
| 208991_at;<br>208992_s_at;<br>225289_at                                                    | STAT3              |                             | x                           | 223834_at                                                      | PD-L1                                    |
| 208991_at;<br>208992_s_at;<br>225289_at                                                    | STAT3              |                             | x                           | 224368_s_at                                                    | NDRG3                                    |
| 208991_at;<br>208992_s_at;<br>225289_at                                                    | STAT3              |                             | x                           | 224772_at                                                      | NAV1                                     |
| 208991_at;<br>208992_s_at;<br>225289_at                                                    | STAT3              |                             | x                           | 224994_at                                                      | CaMK II delta                            |
| 208991_at;<br>208992_s_at;<br>225289_at                                                    | STAT3              |                             | x                           | 226440_at                                                      | JKAP                                     |
| 208991_at;<br>208992_s_at;<br>225289_at                                                    | STAT3              |                             | x                           | 226563_at;<br>235598_at                                        | SMAD2                                    |
| 208991_at;<br>208992_s_at;<br>225289_at                                                    | STAT3              |                             | x                           | 227114_at                                                      | RNF214                                   |
| 208991_at;<br>208992_s_at;<br>225289_at                                                    | STAT3              |                             | x                           | 227249_at                                                      | NudE                                     |
| 208991_at;<br>208992_s_at;<br>225289_at                                                    | STAT3              |                             | x                           | 230821_at                                                      | ZNF148                                   |
| 208991_at;<br>208992_s_at;<br>225289_at                                                    | STAT3              |                             | x                           | 242916_at                                                      | CEP110                                   |
| 208991_at;<br>208992_s_at;<br>225289_at                                                    | STAT3              |                             | x                           | 244463_at                                                      | ADAM23                                   |
| 209390_at                                                                                  | Hamartin           |                             |                             | 1553034_at;<br>1554237_at;<br>227785_at                        | SDCCAG8                                  |
| 209390_at                                                                                  | Hamartin           |                             |                             | 200974_at                                                      | ACTA2                                    |

| <b>IDs in active data set</b>                                                              | <b>Object name</b> | <b>miR-128 tgts_miRanda</b> | <b>Transcription Factor</b> | <b>IDs of corresponding network object from GeneGo network</b> | <b>Corresponding network object name</b> |
|--------------------------------------------------------------------------------------------|--------------------|-----------------------------|-----------------------------|----------------------------------------------------------------|------------------------------------------|
| 1552703_s_at;<br>206011_at;<br>209970_x_at;<br>211366_x_at;<br>211367_s_at;<br>211368_s_at | Caspase-1          | x                           |                             | 1552701_a_at;<br>1552703_s_at                                  | Pseudo-ICE                               |
| 209390_at                                                                                  | Hamartin           |                             |                             | 201939_at                                                      | PLK2                                     |
| 209390_at                                                                                  | Hamartin           |                             |                             | 202240_at                                                      | PLK1                                     |
| 209390_at                                                                                  | Hamartin           |                             |                             | 202336_s_at                                                    | PAM                                      |
| 209390_at                                                                                  | Hamartin           |                             |                             | 202677_at                                                      | p120GAP                                  |
| 209390_at                                                                                  | Hamartin           |                             |                             | 202762_at                                                      | ROCK2                                    |
| 209390_at                                                                                  | Hamartin           |                             |                             | 203213_at;<br>203214_x_at;<br>210559_s_at                      | CDK1 (p34)                               |
| 209390_at                                                                                  | Hamartin           |                             |                             | 203565_s_at                                                    | MAT1                                     |
| 209390_at                                                                                  | Hamartin           |                             |                             | 204969_s_at;<br>212398_at                                      | RDX (radixin)                            |
| 209390_at                                                                                  | Hamartin           |                             |                             | 206377_at                                                      | FOXF2                                    |
| 209390_at                                                                                  | Hamartin           |                             |                             | 207738_s_at                                                    | NckAP1                                   |
| 209390_at                                                                                  | Hamartin           |                             |                             | 209341_s_at                                                    | IKK-beta                                 |
| 209390_at                                                                                  | Hamartin           |                             |                             | 210449_x_at;<br>211561_x_at                                    | p38alpha (MAPK14)                        |
| 209390_at                                                                                  | Hamartin           |                             |                             | 212426_s_at                                                    | 14-3-3 theta                             |
| 209390_at                                                                                  | Hamartin           |                             |                             | 214073_at                                                      | Cortactin                                |
| 209390_at                                                                                  | Hamartin           |                             |                             | 214211_at                                                      | FTH1                                     |
| 209390_at                                                                                  | Hamartin           |                             |                             | 217963_s_at                                                    | NADE(NGFRAP1)                            |
| 209390_at                                                                                  | Hamartin           |                             |                             | 220266_s_at                                                    | KLF4                                     |
| 209390_at                                                                                  | Hamartin           |                             |                             | 223112_s_at                                                    | NDUFB10                                  |
| 209390_at                                                                                  | Hamartin           |                             |                             | 224889_at;<br>231548_at                                        | FOXO3A                                   |
| 209615_s_at                                                                                | PAK1               |                             |                             | 1554168_a_at;<br>223082_at;<br>235692_at                       | CIN85                                    |
| 209615_s_at                                                                                | PAK1               |                             |                             | 1556499_s_at;<br>202310_s_at                                   | COL1A1                                   |
| 209615_s_at                                                                                | PAK1               |                             |                             | 1563466_at;<br>224823_at                                       | MYLK1                                    |
| 209615_s_at                                                                                | PAK1               |                             |                             | 200783_s_at                                                    | Stathmin                                 |
| 209615_s_at                                                                                | PAK1               |                             |                             | 201087_at;<br>211823_s_at                                      | Paxillin                                 |
| 209615_s_at                                                                                | PAK1               |                             |                             | 201542_at;<br>201543_s_at;<br>210790_s_at                      | SAR1A                                    |
| 209615_s_at                                                                                | PAK1               |                             |                             | 201615_x_at                                                    | Caldesmon                                |
| 209615_s_at                                                                                | PAK1               |                             |                             | 201864_at                                                      | RABGDIA                                  |



| <b>IDs in active data set</b>                                                              | <b>Object name</b> | <b>miR-128 tgts_miRanda</b> | <b>Transcription Factor</b> | <b>IDs of corresponding network object from GeneGo network</b> | <b>Corresponding network object name</b>      |
|--------------------------------------------------------------------------------------------|--------------------|-----------------------------|-----------------------------|----------------------------------------------------------------|-----------------------------------------------|
| 1552703_s_at;<br>206011_at;<br>209970_x_at;<br>211366_x_at;<br>211367_s_at;<br>211368_s_at | Caspase-1          | x                           |                             | 1552701_a_at;<br>1552703_s_at                                  | Pseudo-ICE                                    |
| 209615_s_at                                                                                | PAK1               |                             |                             | 202240_at                                                      | PLK1                                          |
| 209615_s_at                                                                                | PAK1               |                             |                             | 202670_at                                                      | MEK1(MAP2K1)                                  |
| 209615_s_at                                                                                | PAK1               |                             |                             | 203065_s_at;<br>212097_at                                      | Caveolin-1                                    |
| 209615_s_at                                                                                | PAK1               |                             |                             | 204444_at                                                      | KNSL1                                         |
| 209615_s_at                                                                                | PAK1               |                             |                             | 205192_at                                                      | NIK(MAP3K14)                                  |
| 209615_s_at                                                                                | PAK1               |                             |                             | 206665_s_at;<br>212312_at                                      | Bcl-XL                                        |
| 209615_s_at                                                                                | PAK1               |                             |                             | 210477_x_at;<br>226048_at                                      | JNK1(MAPK8)                                   |
| 209615_s_at                                                                                | PAK1               |                             |                             | 212073_at                                                      | Casein kinase II,<br>alpha chain<br>(CSNK2A1) |
| 209615_s_at                                                                                | PAK1               |                             |                             | 212372_at;<br>213067_at                                        | MYH10                                         |
| 209615_s_at                                                                                | PAK1               |                             |                             | 212556_at                                                      | SCRIB                                         |
| 209615_s_at                                                                                | PAK1               |                             |                             | 212897_at                                                      | CDK11                                         |
| 209615_s_at                                                                                | PAK1               |                             |                             | 213324_at                                                      | c-Src                                         |
| 209615_s_at                                                                                | PAK1               |                             |                             | 213746_s_at;<br>214752_x_at                                    | Filamin A                                     |
| 209615_s_at                                                                                | PAK1               |                             |                             | 214073_at                                                      | Cortactin                                     |
| 209615_s_at                                                                                | PAK1               |                             |                             | 222077_s_at                                                    | RacGAP1                                       |
| 209615_s_at                                                                                | PAK1               |                             |                             | 223679_at                                                      | Beta-catenin                                  |
| 209615_s_at                                                                                | PAK1               |                             |                             | 224986_s_at                                                    | PDK (PDPK1)                                   |
| 209615_s_at                                                                                | PAK1               |                             |                             | 228938_at                                                      | Myelin basic protein                          |
| 209615_s_at                                                                                | PAK1               |                             |                             | 231801_at                                                      | NF-AT1(NFATC2)                                |
| 209615_s_at                                                                                | PAK1               |                             |                             | 235412_at                                                      | BETA-PIX                                      |
| 210294_at                                                                                  | Tapasin            |                             |                             | 203275_at                                                      | IRF2                                          |
| 210294_at                                                                                  | Tapasin            |                             |                             | 207565_s_at;<br>210224_at                                      | MR1                                           |
| 210294_at                                                                                  | Tapasin            |                             |                             | 208812_x_at;<br>214459_x_at                                    | HLA-Cw3                                       |
| 210294_at                                                                                  | Tapasin            |                             |                             | 208812_x_at;<br>214459_x_at                                    | HLA-C                                         |
| 210294_at                                                                                  | Tapasin            |                             |                             | 209140_x_at                                                    | HLA-B27                                       |
| 210294_at                                                                                  | Tapasin            |                             |                             | 215313_x_at                                                    | HLA-A2                                        |
| 210294_at                                                                                  | Tapasin            |                             |                             | 215313_x_at                                                    | HLA-A                                         |
| 210294_at                                                                                  | Tapasin            |                             |                             | 217192_s_at;<br>228964_at                                      | BLIMP1 (PRDI-BF1)                             |

| <b>IDs in active data set</b>                                                              | <b>Object name</b> | <b>miR-128 tgts_miRanda</b> | <b>Transcription Factor</b> | <b>IDs of corresponding network object from GeneGo network</b> | <b>Corresponding network object name</b> |
|--------------------------------------------------------------------------------------------|--------------------|-----------------------------|-----------------------------|----------------------------------------------------------------|------------------------------------------|
| 1552703_s_at;<br>206011_at;<br>209970_x_at;<br>211366_x_at;<br>211367_s_at;<br>211368_s_at | Caspase-1          | x                           |                             | 1552701_a_at;<br>1552703_s_at                                  | Pseudo-ICE                               |
| 210294_at                                                                                  | Tapasin            |                             |                             | 228033_at;<br>241725_at                                        | E2F7                                     |
| 210385_s_at                                                                                | ARTS-1             |                             |                             | 1554273_a_at;<br>219759_at                                     | ERAP2                                    |
| 210385_s_at                                                                                | ARTS-1             |                             |                             | 1565717_s_at                                                   | FUS                                      |
| 210385_s_at                                                                                | ARTS-1             |                             |                             | 203275_at                                                      | IRF2                                     |
| 210385_s_at                                                                                | ARTS-1             |                             |                             | 205945_at                                                      | IL6RA                                    |
| 210385_s_at                                                                                | ARTS-1             |                             |                             | 217192_s_at;<br>228964_at                                      | BLIMP1 (PRDI-BF1)                        |
| 210385_s_at                                                                                | ARTS-1             |                             |                             | 224986_s_at                                                    | PDK (PDPK1)                              |
| 210385_s_at                                                                                | ARTS-1             |                             |                             | 226660_at                                                      | p70 S6 kinase1                           |
| 210449_x_at;<br>211561_x_at                                                                | p38alpha (MAPK14)  | x                           | x                           | 200783_s_at                                                    | Stathmin                                 |
| 210449_x_at;<br>211561_x_at                                                                | p38alpha (MAPK14)  | x                           | x                           | 200824_at                                                      | GSTP1                                    |
| 210449_x_at;<br>211561_x_at                                                                | p38alpha (MAPK14)  | x                           | x                           | 201693_s_at;<br>201694_s_at;<br>227404_s_at                    | EGR1                                     |
| 210449_x_at;<br>211561_x_at                                                                | p38alpha (MAPK14)  | x                           | x                           | 201841_s_at                                                    | HSP27                                    |
| 210449_x_at;<br>211561_x_at                                                                | p38alpha (MAPK14)  | x                           | x                           | 201853_s_at                                                    | CDC25B                                   |
| 210449_x_at;<br>211561_x_at                                                                | p38alpha (MAPK14)  | x                           | x                           | 202672_s_at                                                    | ATF-3                                    |
| 210449_x_at;<br>211561_x_at                                                                | p38alpha (MAPK14)  | x                           | x                           | 204404_at;<br>225835_at                                        | NKCC1                                    |
| 210449_x_at;<br>211561_x_at                                                                | p38alpha (MAPK14)  | x                           | x                           | 204654_s_at                                                    | AP-2A                                    |
| 210449_x_at;<br>211561_x_at                                                                | p38alpha (MAPK14)  | x                           | x                           | 204739_at                                                      | CENP-C                                   |
| 210449_x_at;<br>211561_x_at                                                                | p38alpha (MAPK14)  | x                           | x                           | 204840_s_at                                                    | EEA1                                     |
| 210449_x_at;<br>211561_x_at                                                                | p38alpha (MAPK14)  | x                           | x                           | 205167_s_at;<br>216914_at;<br>217010_s_at                      | CDC25C                                   |
| 210449_x_at;<br>211561_x_at                                                                | p38alpha (MAPK14)  | x                           | x                           | 205731_s_at;<br>205732_s_at                                    | NCOA2 (GRIP1/TIF2)                       |
| 210449_x_at;<br>211561_x_at                                                                | p38alpha (MAPK14)  | x                           | x                           | 206665_s_at;<br>212312_at                                      | Bcl-XL                                   |

| <b>IDs in active data set</b>                                                              | <b>Object name</b>   | <b>miR-128 tgts_miRanda</b> | <b>Transcription Factor</b> | <b>IDs of corresponding network object from GeneGo network</b> | <b>Corresponding network object name</b>      |
|--------------------------------------------------------------------------------------------|----------------------|-----------------------------|-----------------------------|----------------------------------------------------------------|-----------------------------------------------|
| 1552703_s_at;<br>206011_at;<br>209970_x_at;<br>211366_x_at;<br>211367_s_at;<br>211368_s_at | Caspase-1            | x                           |                             | 1552701_a_at;<br>1552703_s_at                                  | Pseudo-ICE                                    |
| 210449_x_at;<br>211561_x_at                                                                | p38alpha<br>(MAPK14) | x                           | x                           | 206870_at;<br>223438_s_at;<br>244689_at                        | PPAR-alpha                                    |
| 210449_x_at;<br>211561_x_at                                                                | p38alpha<br>(MAPK14) | x                           | x                           | 208885_at                                                      | Plastin                                       |
| 210449_x_at;<br>211561_x_at                                                                | p38alpha<br>(MAPK14) | x                           | x                           | 209332_s_at                                                    | Max                                           |
| 210449_x_at;<br>211561_x_at                                                                | p38alpha<br>(MAPK14) | x                           | x                           | 209339_at                                                      | SIAH2                                         |
| 210449_x_at;<br>211561_x_at                                                                | p38alpha<br>(MAPK14) | x                           | x                           | 209341_s_at                                                    | IKK-beta                                      |
| 210449_x_at;<br>211561_x_at                                                                | p38alpha<br>(MAPK14) | x                           | x                           | 209589_s_at                                                    | Ephrin-B receptor 2                           |
| 210449_x_at;<br>211561_x_at                                                                | p38alpha<br>(MAPK14) | x                           | x                           | 210145_at                                                      | PA24A                                         |
| 210449_x_at;<br>211561_x_at                                                                | p38alpha<br>(MAPK14) | x                           | x                           | 210512_s_at;<br>211527_x_at                                    | VEGF-A                                        |
| 210449_x_at;<br>211561_x_at                                                                | p38alpha<br>(MAPK14) | x                           | x                           | 211962_s_at                                                    | TISB                                          |
| 210449_x_at;<br>211561_x_at                                                                | p38alpha<br>(MAPK14) | x                           | x                           | 212073_at                                                      | Casein kinase II,<br>alpha chain<br>(CSNK2A1) |
| 210449_x_at;<br>211561_x_at                                                                | p38alpha<br>(MAPK14) | x                           | x                           | 213746_s_at;<br>214752_x_at                                    | Filamin A                                     |
| 210449_x_at;<br>211561_x_at                                                                | p38alpha<br>(MAPK14) | x                           | x                           | 218506_x_at;<br>221628_s_at                                    | NP60                                          |
| 210449_x_at;<br>211561_x_at                                                                | p38alpha<br>(MAPK14) | x                           | x                           | 226440_at                                                      | JKAP                                          |
| 210449_x_at;<br>211561_x_at                                                                | p38alpha<br>(MAPK14) | x                           | x                           | 226906_s_at                                                    | ARHGAP9                                       |
| 210449_x_at;<br>211561_x_at                                                                | p38alpha<br>(MAPK14) | x                           | x                           | 228486_at                                                      | SLC44A1                                       |
| 210449_x_at;<br>211561_x_at                                                                | p38alpha<br>(MAPK14) | x                           | x                           | 228938_at                                                      | Myelin basic protein                          |
| 210787_s_at                                                                                | CaMKK2               | x                           | x                           | 1555677_s_at;<br>201589_at                                     | SMC1                                          |
| 210787_s_at                                                                                | CaMKK2               | x                           | x                           | 1555829_at                                                     | FAM62B                                        |
| 210787_s_at                                                                                | CaMKK2               | x                           | x                           | 209615_s_at                                                    | PAK1                                          |
| 210787_s_at                                                                                | CaMKK2               | x                           | x                           | 210449_x_at;                                                   | p38alpha (MAPK14)                             |

| <b>IDs in active data set</b>                                                              | <b>Object name</b> | <b>miR-128 tgts_miRanda</b> | <b>Transcription Factor</b> | <b>IDs of corresponding network object from GeneGo network</b> | <b>Corresponding network object name</b> |
|--------------------------------------------------------------------------------------------|--------------------|-----------------------------|-----------------------------|----------------------------------------------------------------|------------------------------------------|
| 1552703_s_at;<br>206011_at;<br>209970_x_at;<br>211366_x_at;<br>211367_s_at;<br>211368_s_at | Caspase-1          | x                           |                             | 1552701_a_at;<br>1552703_s_at                                  | Pseudo-ICE                               |
|                                                                                            |                    |                             |                             | 211561_x_at                                                    |                                          |
| 210787_s_at                                                                                | CaMKK2             | x                           | x                           | 213007_at                                                      | FANCI (KIAA1794)                         |
| 210787_s_at                                                                                | CaMKK2             | x                           | x                           | 213746_s_at;<br>214752_x_at                                    | Filamin A                                |
| 210787_s_at                                                                                | CaMKK2             | x                           | x                           | 218832_x_at                                                    | Beta-arrestin1                           |
| 210787_s_at                                                                                | CaMKK2             | x                           | x                           | 227892_at;<br>240349_at                                        | AMPK alpha 2 subunit                     |
| 210787_s_at                                                                                | CaMKK2             | x                           | x                           | 235412_at                                                      | BETA-PIX                                 |
| 211271_x_at                                                                                | PTBP1              |                             |                             | 1553346_a_at;<br>224705_s_at                                   | TNRC6A                                   |
| 211271_x_at                                                                                | PTBP1              |                             |                             | 1558111_at;<br>235879_at                                       | MBNL1                                    |
| 211271_x_at                                                                                | PTBP1              |                             |                             | 1558561_at                                                     | Impas 1                                  |
| 211271_x_at                                                                                | PTBP1              |                             |                             | 1565483_at                                                     | EGFR                                     |
| 211271_x_at                                                                                | PTBP1              |                             |                             | 1565717_s_at                                                   | FUS                                      |
| 211271_x_at                                                                                | PTBP1              |                             |                             | 1567223_at;<br>1567224_at                                      | HMGA2                                    |
| 211271_x_at                                                                                | PTBP1              |                             |                             | 200952_s_at;<br>200953_s_at                                    | Cyclin D2                                |
| 211271_x_at                                                                                | PTBP1              |                             |                             | 201087_at;<br>211823_s_at                                      | Paxillin                                 |
| 211271_x_at                                                                                | PTBP1              |                             |                             | 202370_s_at                                                    | CBF beta                                 |
| 211271_x_at                                                                                | PTBP1              |                             |                             | 203275_at                                                      | IRF2                                     |
| 211271_x_at                                                                                | PTBP1              |                             |                             | 203529_at;<br>225426_at;<br>225429_at                          | PP6C                                     |
| 211271_x_at                                                                                | PTBP1              |                             |                             | 203831_at                                                      | R3HDM2                                   |
| 211271_x_at                                                                                | PTBP1              |                             |                             | 204083_s_at;<br>212654_at                                      | Tropomyosin-2                            |
| 211271_x_at                                                                                | PTBP1              |                             |                             | 204455_at                                                      | BPAG1                                    |
| 211271_x_at                                                                                | PTBP1              |                             |                             | 204760_s_at;<br>31637_s_at                                     | REV-ERBalpha                             |
| 211271_x_at                                                                                | PTBP1              |                             |                             | 205436_s_at;<br>213344_s_at                                    | Histone H2AX                             |
| 211271_x_at                                                                                | PTBP1              |                             |                             | 206967_at                                                      | Cyclin T1                                |
| 211271_x_at                                                                                | PTBP1              |                             |                             | 208819_at                                                      | Rab-8                                    |
| 211271_x_at                                                                                | PTBP1              |                             |                             | 209339_at                                                      | SIAH2                                    |
| 211271_x_at                                                                                | PTBP1              |                             |                             | 210282_at                                                      | ZNF198                                   |
| 211271_x_at                                                                                | PTBP1              |                             |                             | 210512_s_at;                                                   | VEGF-A                                   |

| <b>IDs in active data set</b>                                                              | <b>Object name</b> | <b>miR-128 tgts_miRanda</b> | <b>Transcription Factor</b> | <b>IDs of corresponding network object from GeneGo network</b> | <b>Corresponding network object name</b> |
|--------------------------------------------------------------------------------------------|--------------------|-----------------------------|-----------------------------|----------------------------------------------------------------|------------------------------------------|
| 1552703_s_at;<br>206011_at;<br>209970_x_at;<br>211366_x_at;<br>211367_s_at;<br>211368_s_at | Caspase-1          | x                           |                             | 1552701_a_at;<br>1552703_s_at                                  | Pseudo-ICE                               |
|                                                                                            |                    |                             |                             | 211527_x_at                                                    |                                          |
| 211271_x_at                                                                                | PTBP1              |                             |                             | 211994_at                                                      | WNK1                                     |
| 211271_x_at                                                                                | PTBP1              |                             |                             | 213517_at                                                      | PCBP-2                                   |
| 211271_x_at                                                                                | PTBP1              |                             |                             | 214073_at                                                      | Cortactin                                |
| 211271_x_at                                                                                | PTBP1              |                             |                             | 215959_at                                                      | Liprin-beta 2                            |
| 211271_x_at                                                                                | PTBP1              |                             |                             | 216215_s_at                                                    | RBM9                                     |
| 211271_x_at                                                                                | PTBP1              |                             |                             | 218039_at                                                      | NUSAP1                                   |
| 211271_x_at                                                                                | PTBP1              |                             |                             | 218683_at                                                      | PTB2                                     |
| 211271_x_at                                                                                | PTBP1              |                             |                             | 221264_s_at                                                    | TARDBP (TDP43)                           |
| 211271_x_at                                                                                | PTBP1              |                             |                             | 225878_at                                                      | KIF1B                                    |
| 211271_x_at                                                                                | PTBP1              |                             |                             | 227394_at                                                      | NCAM1                                    |
| 211271_x_at                                                                                | PTBP1              |                             |                             | 244653_at                                                      | SET7                                     |
| 213136_at;<br>241622_at;<br>241623_at;<br>241983_at                                        | PTPN2              |                             |                             | 1565483_at                                                     | EGFR                                     |
| 213136_at;<br>241622_at;<br>241623_at;<br>241983_at                                        | PTPN2              |                             |                             | 203010_at                                                      | STAT5A                                   |
| 213136_at;<br>241622_at;<br>241623_at;<br>241983_at                                        | PTPN2              |                             |                             | 203065_s_at;<br>212097_at                                      | Caveolin-1                               |
| 213136_at;<br>241622_at;<br>241623_at;<br>241983_at                                        | PTPN2              |                             |                             | 204254_s_at;<br>204255_s_at;<br>213692_s_at                    | VDR                                      |
| 213136_at;<br>241622_at;<br>241623_at;<br>241983_at                                        | PTPN2              |                             |                             | 205810_s_at                                                    | N-WASP                                   |
| 213136_at;<br>241622_at;<br>241623_at;<br>241983_at                                        | PTPN2              |                             |                             | 205812_s_at                                                    | TMED9                                    |
| 213136_at;<br>241622_at;<br>241623_at;                                                     | PTPN2              |                             |                             | 208991_at;<br>208992_s_at;<br>225289_at                        | STAT3                                    |

| <b>IDs in active data set</b>                                                              | <b>Object name</b> | <b>miR-128 tgts_miRanda</b> | <b>Transcription Factor</b> | <b>IDs of corresponding network object from GeneGo network</b> | <b>Corresponding network object name</b> |
|--------------------------------------------------------------------------------------------|--------------------|-----------------------------|-----------------------------|----------------------------------------------------------------|------------------------------------------|
| 1552703_s_at;<br>206011_at;<br>209970_x_at;<br>211366_x_at;<br>211367_s_at;<br>211368_s_at | Caspase-1          | x                           |                             | 1552701_a_at;<br>1552703_s_at                                  | Pseudo-ICE                               |
| 241983_at                                                                                  |                    |                             |                             |                                                                |                                          |
| 213136_at;<br>241622_at;<br>241623_at;<br>241983_at                                        | PTPN2              |                             |                             | 212549_at                                                      | STAT5B                                   |
| 213136_at;<br>241622_at;<br>241623_at;<br>241983_at                                        | PTPN2              |                             |                             | 213003_s_at                                                    | C/EBPdelta                               |
| 213136_at;<br>241622_at;<br>241623_at;<br>241983_at                                        | PTPN2              |                             |                             | 213324_at                                                      | c-Src                                    |
| 213226_at                                                                                  | Cyclin A2          |                             | x                           | 1558233_s_at;<br>1565269_s_at                                  | ATF-1                                    |
| 213226_at                                                                                  | Cyclin A2          |                             | x                           | 200711_s_at;<br>200719_at                                      | SKP1                                     |
| 213226_at                                                                                  | Cyclin A2          |                             | x                           | 201549_x_at                                                    | PLU-1                                    |
| 213226_at                                                                                  | Cyclin A2          |                             | x                           | 201897_s_at                                                    | CKS1                                     |
| 213226_at                                                                                  | Cyclin A2          |                             | x                           | 202580_x_at                                                    | FOXM1                                    |
| 213226_at                                                                                  | Cyclin A2          |                             | x                           | 202672_s_at                                                    | ATF-3                                    |
| 213226_at                                                                                  | Cyclin A2          |                             | x                           | 203975_s_at;<br>229808_at                                      | ChAF1 subunit A                          |
| 213226_at                                                                                  | Cyclin A2          |                             | x                           | 204109_s_at;<br>228433_at                                      | NFYA                                     |
| 213226_at                                                                                  | Cyclin A2          |                             | x                           | 204170_s_at                                                    | CKS2                                     |
| 213226_at                                                                                  | Cyclin A2          |                             | x                           | 204767_s_at;<br>204768_s_at                                    | FEN1                                     |
| 213226_at                                                                                  | Cyclin A2          |                             | x                           | 205167_s_at;<br>216914_at;<br>217010_s_at                      | CDC25C                                   |
| 213226_at                                                                                  | Cyclin A2          |                             | x                           | 209715_at;<br>212126_at                                        | HP1 alpha                                |
| 213226_at                                                                                  | Cyclin A2          |                             | x                           | 209741_x_at;<br>216399_s_at                                    | ZNF291                                   |
| 213226_at                                                                                  | Cyclin A2          |                             | x                           | 213348_at                                                      | p57                                      |
| 213226_at                                                                                  | Cyclin A2          |                             | x                           | 214881_s_at                                                    | UBF                                      |
| 213226_at                                                                                  | Cyclin A2          |                             | x                           | 226554_at                                                      | FBI-1 (Pokemon)                          |
| 213324_at                                                                                  | c-Src              |                             |                             | 1320_at;                                                       | PTPD1                                    |

| <b>IDs in active data set</b>                                                              | <b>Object name</b> | <b>miR-128 tgts_miRanda</b> | <b>Transcription Factor</b> | <b>IDs of corresponding network object from GeneGo network</b> | <b>Corresponding network object name</b> |
|--------------------------------------------------------------------------------------------|--------------------|-----------------------------|-----------------------------|----------------------------------------------------------------|------------------------------------------|
| 1552703_s_at;<br>206011_at;<br>209970_x_at;<br>211366_x_at;<br>211367_s_at;<br>211368_s_at | Caspase-1          | x                           |                             | 1552701_a_at;<br>1552703_s_at                                  | Pseudo-ICE                               |
|                                                                                            |                    |                             |                             | 205438_at;<br>226380_at;<br>40524_at                           |                                          |
| 213324_at                                                                                  | c-Src              |                             |                             | 1554168_a_at;<br>223082_at;<br>235692_at                       | CIN85                                    |
| 213324_at                                                                                  | c-Src              |                             |                             | 1555480_a_at;<br>225258_at                                     | Migfilin                                 |
| 213324_at                                                                                  | c-Src              |                             |                             | 1555832_s_at                                                   | KLF6                                     |
| 213324_at                                                                                  | c-Src              |                             |                             | 1555960_at                                                     | HINT                                     |
| 213324_at                                                                                  | c-Src              |                             |                             | 1557458_s_at;<br>204657_s_at;<br>230459_s_at                   | SHB                                      |
| 213324_at                                                                                  | c-Src              |                             |                             | 1563466_at;<br>224823_at                                       | MYLK1                                    |
| 213324_at                                                                                  | c-Src              |                             |                             | 201087_at;<br>211823_s_at                                      | Paxillin                                 |
| 213324_at                                                                                  | c-Src              |                             |                             | 201502_s_at                                                    | NFKBIA                                   |
| 213324_at                                                                                  | c-Src              |                             |                             | 201693_s_at;<br>201694_s_at;<br>227404_s_at                    | EGR1                                     |
| 213324_at                                                                                  | c-Src              |                             |                             | 201874_at;<br>201875_s_at                                      | MPZL1                                    |
| 213324_at                                                                                  | c-Src              |                             |                             | 202668_at;<br>202669_s_at                                      | Ephrin-B2 (CTF2)                         |
| 213324_at                                                                                  | c-Src              |                             |                             | 202668_at;<br>202669_s_at                                      | Ephrin-B2                                |
| 213324_at                                                                                  | c-Src              |                             |                             | 202677_at                                                      | p120GAP                                  |
| 213324_at                                                                                  | c-Src              |                             |                             | 203010_at                                                      | STAT5A                                   |
| 213324_at                                                                                  | c-Src              |                             |                             | 203036_s_at;<br>203037_s_at;<br>210359_at;<br>210360_s_at      | MTSS1                                    |
| 213324_at                                                                                  | c-Src              |                             |                             | 203065_s_at;<br>212097_at                                      | Caveolin-1                               |
| 213324_at                                                                                  | c-Src              |                             |                             | 203431_s_at                                                    | p200RhoGAP                               |
| 213324_at                                                                                  | c-Src              |                             |                             | 204254_s_at;<br>204255_s_at;<br>213692_s_at                    | VDR                                      |

| <b>IDs in active data set</b>                                                              | <b>Object name</b> | <b>miR-128 tgts_miRanda</b> | <b>Transcription Factor</b> | <b>IDs of corresponding network object from GeneGo network</b> | <b>Corresponding network object name</b> |
|--------------------------------------------------------------------------------------------|--------------------|-----------------------------|-----------------------------|----------------------------------------------------------------|------------------------------------------|
| 1552703_s_at;<br>206011_at;<br>209970_x_at;<br>211366_x_at;<br>211367_s_at;<br>211368_s_at | Caspase-1          | x                           |                             | 1552701_a_at;<br>1552703_s_at                                  | Pseudo-ICE                               |
| 213324_at                                                                                  | c-Src              |                             |                             | 204363_at                                                      | Tissue factor                            |
| 213324_at                                                                                  | c-Src              |                             |                             | 204466_s_at;<br>207827_x_at;<br>211546_x_at                    | Alpha-synuclein                          |
| 213324_at                                                                                  | c-Src              |                             |                             | 204626_s_at;<br>204627_s_at;<br>204628_s_at;<br>216261_at      | ITGB3                                    |
| 213324_at                                                                                  | c-Src              |                             |                             | 204760_s_at;<br>31637_s_at                                     | TR-alpha                                 |
| 213324_at                                                                                  | c-Src              |                             |                             | 205167_s_at;<br>216914_at;<br>217010_s_at                      | CDC25C                                   |
| 213324_at                                                                                  | c-Src              |                             |                             | 205603_s_at;<br>205726_at;<br>217246_s_at                      | HDIA2                                    |
| 213324_at                                                                                  | c-Src              |                             |                             | 205880_at                                                      | PKC-mu                                   |
| 213324_at                                                                                  | c-Src              |                             |                             | 205945_at                                                      | IL6RA                                    |
| 213324_at                                                                                  | c-Src              |                             |                             | 206114_at;<br>227449_at;<br>228948_at;<br>229374_at            | Ephrin-A receptor 4                      |
| 213324_at                                                                                  | c-Src              |                             |                             | 206170_at                                                      | Beta-2 adrenergic receptor               |
| 213324_at                                                                                  | c-Src              |                             |                             | 206412_at                                                      | Fer                                      |
| 213324_at                                                                                  | c-Src              |                             |                             | 206492_at                                                      | FHIT                                     |
| 213324_at                                                                                  | c-Src              |                             |                             | 207112_s_at;<br>225998_at                                      | GAB1                                     |
| 213324_at                                                                                  | c-Src              |                             |                             | 208430_s_at;<br>210736_x_at;<br>211493_x_at;<br>227084_at      | Dystrobrevin alpha                       |
| 213324_at                                                                                  | c-Src              |                             |                             | 208877_at;<br>208878_s_at                                      | PAK2                                     |
| 213324_at                                                                                  | c-Src              |                             |                             | 209090_s_at                                                    | Endophilin B1                            |
| 213324_at                                                                                  | c-Src              |                             |                             | 209140_x_at                                                    | HLAB                                     |
| 213324_at                                                                                  | c-Src              |                             |                             | 209341_s_at                                                    | IKK-beta                                 |
| 213324_at                                                                                  | c-Src              |                             |                             | 209589_s_at                                                    | Ephrin-B receptor 2                      |
| 213324_at                                                                                  | c-Src              |                             |                             | 209682_at                                                      | CBL-B                                    |



| <b>IDs in active data set</b>                                                              | <b>Object name</b> | <b>miR-128 tgts_miRanda</b> | <b>Transcription Factor</b> | <b>IDs of corresponding network object from GeneGo network</b>                             | <b>Corresponding network object name</b> |
|--------------------------------------------------------------------------------------------|--------------------|-----------------------------|-----------------------------|--------------------------------------------------------------------------------------------|------------------------------------------|
| 1552703_s_at;<br>206011_at;<br>209970_x_at;<br>211366_x_at;<br>211367_s_at;<br>211368_s_at | Caspase-1          | x                           |                             | 1552701_a_at;<br>1552703_s_at                                                              | Pseudo-ICE                               |
| 213324_at                                                                                  | c-Src              |                             |                             | 209691_s_at                                                                                | IRS5(DOK4)                               |
| 213324_at                                                                                  | c-Src              |                             |                             | 209925_at                                                                                  | Occludin                                 |
| 213324_at                                                                                  | c-Src              |                             |                             | 210145_at                                                                                  | PA24A                                    |
| 213324_at                                                                                  | c-Src              |                             |                             | 210449_x_at;<br>211561_x_at                                                                | p38alpha (MAPK14)                        |
| 213324_at                                                                                  | c-Src              |                             |                             | 210512_s_at;<br>211527_x_at                                                                | VEGF-A                                   |
| 213324_at                                                                                  | c-Src              |                             |                             | 210684_s_at                                                                                | PSD-95                                   |
| 213324_at                                                                                  | c-Src              |                             |                             | 210753_s_at;<br>211898_s_at;<br>230425_at                                                  | Ephrin-B receptor 1                      |
| 213324_at                                                                                  | c-Src              |                             |                             | 211005_at                                                                                  | LAT                                      |
| 213324_at                                                                                  | c-Src              |                             |                             | 212167_s_at                                                                                | BAF47                                    |
| 213324_at                                                                                  | c-Src              |                             |                             | 212549_at                                                                                  | STAT5B                                   |
| 213324_at                                                                                  | c-Src              |                             |                             | 213226_at                                                                                  | Cyclin A2                                |
| 213324_at                                                                                  | c-Src              |                             |                             | 213795_s_at                                                                                | PTPR-alpha                               |
| 213324_at                                                                                  | c-Src              |                             |                             | 214073_at                                                                                  | Cortactin                                |
| 213324_at                                                                                  | c-Src              |                             |                             | 218264_at                                                                                  | BCCIP                                    |
| 213324_at                                                                                  | c-Src              |                             |                             | 218832_x_at                                                                                | Beta-arrestin1                           |
| 213324_at                                                                                  | c-Src              |                             |                             | 218943_s_at                                                                                | RIG-I                                    |
| 213324_at                                                                                  | c-Src              |                             |                             | 222635_s_at                                                                                | EG1                                      |
| 213324_at                                                                                  | c-Src              |                             |                             | 223891_at;<br>244623_at                                                                    | KCNQ5                                    |
| 213324_at                                                                                  | c-Src              |                             |                             | 224861_at                                                                                  | G-protein alpha-q                        |
| 213324_at                                                                                  | c-Src              |                             |                             | 226020_s_at                                                                                | DAB1                                     |
| 213324_at                                                                                  | c-Src              |                             |                             | 226660_at                                                                                  | p70 S6 kinase1                           |
| 213324_at                                                                                  | c-Src              |                             |                             | 226666_at                                                                                  | DAAM1                                    |
| 213324_at                                                                                  | c-Src              |                             |                             | 227394_at                                                                                  | NCAM1                                    |
| 213324_at                                                                                  | c-Src              |                             |                             | 227884_at;<br>227891_s_at;<br>234168_at                                                    | TAF15                                    |
| 213324_at                                                                                  | c-Src              |                             |                             | 230190_at                                                                                  | NDFIP2                                   |
| 213517_at                                                                                  | PCBP-2             |                             |                             | 1552703_s_at;<br>206011_at;<br>209970_x_at;<br>211366_x_at;<br>211367_s_at;<br>211368_s_at | Caspase-1                                |
| 213517_at                                                                                  | PCBP-2             |                             |                             | 1556499_s_at;                                                                              | COL1A1                                   |

| <b>IDs in active data set</b>                                                              | <b>Object name</b> | <b>miR-128 tgts_miRanda</b> | <b>Transcription Factor</b> | <b>IDs of corresponding network object from GeneGo network</b> | <b>Corresponding network object name</b> |
|--------------------------------------------------------------------------------------------|--------------------|-----------------------------|-----------------------------|----------------------------------------------------------------|------------------------------------------|
| 1552703_s_at;<br>206011_at;<br>209970_x_at;<br>211366_x_at;<br>211367_s_at;<br>211368_s_at | Caspase-1          | x                           |                             | 1552701_a_at;<br>1552703_s_at                                  | Pseudo-ICE                               |
|                                                                                            |                    |                             |                             | 202310_s_at                                                    |                                          |
| 213517_at                                                                                  | PCBP-2             |                             |                             | 1559946_s_at;<br>201459_at                                     | RUVBL2                                   |
| 213517_at                                                                                  | PCBP-2             |                             |                             | 200790_at                                                      | DCOR                                     |
| 213517_at                                                                                  | PCBP-2             |                             |                             | 202240_at                                                      | PLK1                                     |
| 213517_at                                                                                  | PCBP-2             |                             |                             | 205436_s_at;<br>213344_s_at                                    | Histone H2AX                             |
| 213517_at                                                                                  | PCBP-2             |                             |                             | 205552_s_at                                                    | OAS1                                     |
| 213517_at                                                                                  | PCBP-2             |                             |                             | 209077_at                                                      | MT-TRX                                   |
| 213517_at                                                                                  | PCBP-2             |                             |                             | 210684_s_at                                                    | PSD-95                                   |
| 213517_at                                                                                  | PCBP-2             |                             |                             | 213324_at                                                      | c-Src                                    |
| 213517_at                                                                                  | PCBP-2             |                             |                             | 213359_at;<br>221480_at                                        | AUF1                                     |
| 213517_at                                                                                  | PCBP-2             |                             |                             | 213649_at                                                      | SFRS7 (9G8)                              |
| 213517_at                                                                                  | PCBP-2             |                             |                             | 213746_s_at;<br>214752_x_at                                    | Filamin A                                |
| 213517_at                                                                                  | PCBP-2             |                             |                             | 214195_at                                                      | CLN2 (Tripeptidyl-peptidase I)           |
| 213517_at                                                                                  | PCBP-2             |                             |                             | 221264_s_at                                                    | TARDBP (TDP43)                           |
| 213517_at                                                                                  | PCBP-2             |                             |                             | 226687_at                                                      | HYP A                                    |
| 213517_at                                                                                  | PCBP-2             |                             |                             | 237485_at                                                      | SFRS3                                    |
| 213517_at                                                                                  | PCBP-2             |                             |                             | 242260_at                                                      | Matrin-3                                 |
| 214073_at                                                                                  | Cortactin          |                             |                             | 1563466_at;<br>224823_at                                       | MYLK1                                    |
| 214073_at                                                                                  | Cortactin          |                             |                             | 201615_x_at                                                    | Caldesmon                                |
| 214073_at                                                                                  | Cortactin          |                             |                             | 201693_s_at;<br>201694_s_at;<br>227404_s_at                    | EGR1                                     |
| 214073_at                                                                                  | Cortactin          |                             |                             | 201841_s_at                                                    | HSP27                                    |
| 214073_at                                                                                  | Cortactin          |                             |                             | 202637_s_at;<br>202638_s_at;<br>215485_s_at                    | ICAM1                                    |
| 214073_at                                                                                  | Cortactin          |                             |                             | 202663_at;<br>202665_s_at                                      | WaspIP                                   |
| 214073_at                                                                                  | Cortactin          |                             |                             | 203036_s_at;<br>203037_s_at;<br>210359_at;<br>210360_s_at      | MTSS1                                    |
| 214073_at                                                                                  | Cortactin          |                             |                             | 205810_s_at                                                    | N-WASP                                   |

| <b>IDs in active data set</b>                                                              | <b>Object name</b> | <b>miR-128 tgts_miRanda</b> | <b>Transcription Factor</b> | <b>IDs of corresponding network object from GeneGo network</b> | <b>Corresponding network object name</b> |
|--------------------------------------------------------------------------------------------|--------------------|-----------------------------|-----------------------------|----------------------------------------------------------------|------------------------------------------|
| 1552703_s_at;<br>206011_at;<br>209970_x_at;<br>211366_x_at;<br>211367_s_at;<br>211368_s_at | Caspase-1          | x                           |                             | 1552701_a_at;<br>1552703_s_at                                  | Pseudo-ICE                               |
| 214073_at                                                                                  | Cortactin          |                             |                             | 205880_at                                                      | PKC-mu                                   |
| 214073_at                                                                                  | Cortactin          |                             |                             | 206114_at;<br>227449_at;<br>228948_at;<br>229374_at            | Ephrin-A receptor 4                      |
| 214073_at                                                                                  | Cortactin          |                             |                             | 206412_at                                                      | Fer                                      |
| 214073_at                                                                                  | Cortactin          |                             |                             | 206846_s_at                                                    | HDAC6                                    |
| 214073_at                                                                                  | Cortactin          |                             |                             | 208877_at;<br>208878_s_at                                      | PAK2                                     |
| 214073_at                                                                                  | Cortactin          |                             |                             | 213307_at;<br>243681_at                                        | SHANK2                                   |
| 214073_at                                                                                  | Cortactin          |                             |                             | 214607_at                                                      | PAK3                                     |
| 214073_at                                                                                  | Cortactin          |                             |                             | 218683_at                                                      | PTB2                                     |
| 214073_at                                                                                  | Cortactin          |                             |                             | 220563_s_at                                                    | SHANK1                                   |
| 214073_at                                                                                  | Cortactin          |                             |                             | 227394_at                                                      | NCAM1                                    |
| 216277_at                                                                                  | BUB1               | x                           |                             | 1553690_at                                                     | Sgo1                                     |
| 216277_at                                                                                  | BUB1               | x                           |                             | 200711_s_at;<br>200719_at                                      | SKP1                                     |
| 216277_at                                                                                  | BUB1               | x                           |                             | 201458_s_at;<br>209974_s_at                                    | BUB3                                     |
| 216277_at                                                                                  | BUB1               | x                           |                             | 202240_at                                                      | PLK1                                     |
| 216277_at                                                                                  | BUB1               | x                           |                             | 203213_at;<br>203214_x_at;<br>210559_s_at                      | CDK1 (p34)                               |
| 216277_at                                                                                  | BUB1               | x                           |                             | 203952_at                                                      | ATF-6 alpha                              |
| 216277_at                                                                                  | BUB1               | x                           |                             | 204026_s_at                                                    | HZwint-1                                 |
| 216277_at                                                                                  | BUB1               | x                           |                             | 204162_at                                                      | HEC                                      |
| 216277_at                                                                                  | BUB1               | x                           |                             | 208093_s_at                                                    | NUDEL                                    |
| 216277_at                                                                                  | BUB1               | x                           |                             | 209891_at                                                      | SPBC25                                   |
| 216277_at                                                                                  | BUB1               | x                           |                             | 231714_s_at;<br>231962_at;<br>236221_at                        | AP4B1                                    |
| 216277_at                                                                                  | BUB1               | x                           |                             | 238068_at                                                      | ARIH2 (TRIAD1)                           |
| 218117_at                                                                                  | RING-box protein 1 | x                           |                             | 1555960_at                                                     | HINT                                     |
| 218117_at                                                                                  | RING-box protein 1 | x                           |                             | 1567014_s_at;<br>1567015_at                                    | NRF2                                     |
| 218117_at                                                                                  | RING-box protein 1 | x                           |                             | 200085_s_at;<br>213877_x_at                                    | Elongin B                                |

| <b>IDs in active data set</b>                                                              | <b>Object name</b> | <b>miR-128 tgts_miRanda</b> | <b>Transcription Factor</b> | <b>IDs of corresponding network object from GeneGo network</b> | <b>Corresponding network object name</b> |
|--------------------------------------------------------------------------------------------|--------------------|-----------------------------|-----------------------------|----------------------------------------------------------------|------------------------------------------|
| 1552703_s_at;<br>206011_at;<br>209970_x_at;<br>211366_x_at;<br>211367_s_at;<br>211368_s_at | Caspase-1          | x                           |                             | 1552701_a_at;<br>1552703_s_at                                  | Pseudo-ICE                               |
| 218117_at                                                                                  | RING-box protein 1 | x                           |                             | 200711_s_at;<br>200719_at                                      | SKP1                                     |
| 218117_at                                                                                  | RING-box protein 1 | x                           |                             | 200952_s_at;<br>200953_s_at                                    | Cyclin D2                                |
| 218117_at                                                                                  | RING-box protein 1 | x                           |                             | 201090_x_at;<br>212639_x_at;<br>213646_x_at                    | Tubulin alpha-1B                         |
| 218117_at                                                                                  | RING-box protein 1 | x                           |                             | 201316_at                                                      | PSMA2                                    |
| 218117_at                                                                                  | RING-box protein 1 | x                           |                             | 201840_at                                                      | NEDD8                                    |
| 218117_at                                                                                  | RING-box protein 1 | x                           |                             | 208838_at;<br>208839_s_at                                      | TIP120A                                  |
| 218117_at                                                                                  | RING-box protein 1 | x                           |                             | 211995_x_at;<br>212988_x_at                                    | Actin cytoplasmic 2                      |
| 218117_at                                                                                  | RING-box protein 1 | x                           |                             | 213497_at                                                      | ABTB2                                    |
| 218117_at                                                                                  | RING-box protein 1 | x                           |                             | 218284_at                                                      | SMAD3                                    |
| 218117_at                                                                                  | RING-box protein 1 | x                           |                             | 218432_at;<br>229955_at                                        | Fbxo3                                    |
| 218117_at                                                                                  | RING-box protein 1 | x                           |                             | 223679_at                                                      | Beta-catenin                             |
| 218117_at                                                                                  | RING-box protein 1 | x                           |                             | 226660_at                                                      | p70 S6 kinase1                           |
| 218117_at                                                                                  | RING-box protein 1 | x                           |                             | 241747_s_at                                                    | Cullin7                                  |
| 218284_at                                                                                  | SMAD3              |                             | x                           | 1552737_s_at                                                   | WWP2                                     |
| 218284_at                                                                                  | SMAD3              |                             | x                           | 1553102_a_at;<br>212886_at                                     | CCDC69                                   |
| 218284_at                                                                                  | SMAD3              |                             | x                           | 1553533_at                                                     | JPH1                                     |
| 218284_at                                                                                  | SMAD3              |                             | x                           | 1554481_a_at;<br>214530_x_at                                   | EPB41                                    |
| 218284_at                                                                                  | SMAD3              |                             | x                           | 1558199_at                                                     | Fibronectin                              |
| 218284_at                                                                                  | SMAD3              |                             | x                           | 1559548_at;<br>220028_at;<br>236126_at                         | ActRIIB                                  |
| 218284_at                                                                                  | SMAD3              |                             | x                           | 1567223_at;<br>1567224_at                                      | HMGA2                                    |

| <b>IDs in active data set</b>                                                              | <b>Object name</b> | <b>miR-128 tgts_miRanda</b> | <b>Transcription Factor</b> | <b>IDs of corresponding network object from GeneGo network</b> | <b>Corresponding network object name</b> |
|--------------------------------------------------------------------------------------------|--------------------|-----------------------------|-----------------------------|----------------------------------------------------------------|------------------------------------------|
| 1552703_s_at;<br>206011_at;<br>209970_x_at;<br>211366_x_at;<br>211367_s_at;<br>211368_s_at | Caspase-1          | x                           |                             | 1552701_a_at;<br>1552703_s_at                                  | Pseudo-ICE                               |
| 218284_at                                                                                  | SMAD3              |                             | x                           | 1568574_x_at                                                   | Osteopontin                              |
| 218284_at                                                                                  | SMAD3              |                             | x                           | 1568765_at;<br>202627_s_at;<br>202628_s_at                     | PAI1                                     |
| 218284_at                                                                                  | SMAD3              |                             | x                           | 201042_at;<br>211003_x_at;<br>211573_x_at                      | TGM2                                     |
| 218284_at                                                                                  | SMAD3              |                             | x                           | 201124_at                                                      | ITGB5                                    |
| 218284_at                                                                                  | SMAD3              |                             | x                           | 201458_s_at;<br>209974_s_at                                    | BUB3                                     |
| 218284_at                                                                                  | SMAD3              |                             | x                           | 201666_at                                                      | TIMP1                                    |
| 218284_at                                                                                  | SMAD3              |                             | x                           | 201693_s_at;<br>201694_s_at;<br>227404_s_at                    | EGR1                                     |
| 218284_at                                                                                  | SMAD3              |                             | x                           | 201906_s_at                                                    | CTDSPL                                   |
| 218284_at                                                                                  | SMAD3              |                             | x                           | 201908_at                                                      | DVL-3                                    |
| 218284_at                                                                                  | SMAD3              |                             | x                           | 202149_at;<br>202150_s_at                                      | CAS-L                                    |
| 218284_at                                                                                  | SMAD3              |                             | x                           | 202267_at;<br>207517_at                                        | LAMC2                                    |
| 218284_at                                                                                  | SMAD3              |                             | x                           | 202672_s_at                                                    | ATF-3                                    |
| 218284_at                                                                                  | SMAD3              |                             | x                           | 202704_at                                                      | Tob1                                     |
| 218284_at                                                                                  | SMAD3              |                             | x                           | 203445_s_at                                                    | CTDSP2 (SCP2)                            |
| 218284_at                                                                                  | SMAD3              |                             | x                           | 203655_at                                                      | XRCC1                                    |
| 218284_at                                                                                  | SMAD3              |                             | x                           | 204270_at                                                      | Ski                                      |
| 218284_at                                                                                  | SMAD3              |                             | x                           | 204822_at                                                      | TTK                                      |
| 218284_at                                                                                  | SMAD3              |                             | x                           | 204825_at                                                      | HPK38                                    |
| 218284_at                                                                                  | SMAD3              |                             | x                           | 204933_s_at                                                    | Osteoprotegerin                          |
| 218284_at                                                                                  | SMAD3              |                             | x                           | 205014_at                                                      | HBP17                                    |
| 218284_at                                                                                  | SMAD3              |                             | x                           | 205209_at;<br>208218_s_at;<br>208223_s_at;<br>213198_at        | ALK-4                                    |
| 218284_at                                                                                  | SMAD3              |                             | x                           | 205731_s_at;<br>205732_s_at                                    | NCOA2<br>(GRIP1/TIF2)                    |
| 218284_at                                                                                  | SMAD3              |                             | x                           | 206649_s_at                                                    | TFE3                                     |
| 218284_at                                                                                  | SMAD3              |                             | x                           | 206877_at;<br>228846_at                                        | MAD                                      |
| 218284_at                                                                                  | SMAD3              |                             | x                           | 206967_at                                                      | Cyclin T1                                |

| <b>IDs in active data set</b>                                                              | <b>Object name</b> | <b>miR-128 tgts_miRanda</b> | <b>Transcription Factor</b> | <b>IDs of corresponding network object from GeneGo network</b> | <b>Corresponding network object name</b> |
|--------------------------------------------------------------------------------------------|--------------------|-----------------------------|-----------------------------|----------------------------------------------------------------|------------------------------------------|
| 1552703_s_at;<br>206011_at;<br>209970_x_at;<br>211366_x_at;<br>211367_s_at;<br>211368_s_at | Caspase-1          | x                           |                             | 1552701_a_at;<br>1552703_s_at                                  | Pseudo-ICE                               |
| 218284_at                                                                                  | SMAD3              |                             | x                           | 207836_s_at                                                    | RBPMS                                    |
| 218284_at                                                                                  | SMAD3              |                             | x                           | 207980_s_at;<br>209357_at                                      | CITED2                                   |
| 218284_at                                                                                  | SMAD3              |                             | x                           | 208394_x_at                                                    | ESM-1                                    |
| 218284_at                                                                                  | SMAD3              |                             | x                           | 208988_at;<br>208989_s_at                                      | FBXL11                                   |
| 218284_at                                                                                  | SMAD3              |                             | x                           | 209332_s_at                                                    | Max                                      |
| 218284_at                                                                                  | SMAD3              |                             | x                           | 209892_at;<br>209893_s_at                                      | FUT4                                     |
| 218284_at                                                                                  | SMAD3              |                             | x                           | 209925_at                                                      | Occludin                                 |
| 218284_at                                                                                  | SMAD3              |                             | x                           | 210282_at                                                      | ZNF198                                   |
| 218284_at                                                                                  | SMAD3              |                             | x                           | 210477_x_at;<br>226048_at                                      | JNK1(MAPK8)                              |
| 218284_at                                                                                  | SMAD3              |                             | x                           | 210512_s_at;<br>211527_x_at                                    | VEGF-A                                   |
| 218284_at                                                                                  | SMAD3              |                             | x                           | 211114_x_at;<br>211115_x_at                                    | SIP1                                     |
| 218284_at                                                                                  | SMAD3              |                             | x                           | 211711_s_at;<br>242622_x_at                                    | PTEN                                     |
| 218284_at                                                                                  | SMAD3              |                             | x                           | 211994_at                                                      | WNK1                                     |
| 218284_at                                                                                  | SMAD3              |                             | x                           | 212213_x_at;<br>212214_at;<br>214306_at                        | OPA1                                     |
| 218284_at                                                                                  | SMAD3              |                             | x                           | 212533_at                                                      | Wee1                                     |
| 218284_at                                                                                  | SMAD3              |                             | x                           | 213003_s_at                                                    | C/EBPdelta                               |
| 218284_at                                                                                  | SMAD3              |                             | x                           | 213032_at;<br>213033_s_at                                      | NFIB                                     |
| 218284_at                                                                                  | SMAD3              |                             | x                           | 213746_s_at;<br>214752_x_at                                    | Filamin A                                |
| 218284_at                                                                                  | SMAD3              |                             | x                           | 214856_at;<br>215918_s_at                                      | Beta-fodrin                              |
| 218284_at                                                                                  | SMAD3              |                             | x                           | 215237_at                                                      | Zizimin 1                                |
| 218284_at                                                                                  | SMAD3              |                             | x                           | 216004_s_at                                                    | PREP1                                    |
| 218284_at                                                                                  | SMAD3              |                             | x                           | 217542_at                                                      | MDM2                                     |
| 218284_at                                                                                  | SMAD3              |                             | x                           | 217875_s_at;<br>222449_at;<br>222450_at                        | PMEPA1                                   |
| 218284_at                                                                                  | SMAD3              |                             | x                           | 217941_s_at;<br>222473_s_at                                    | ERBIN                                    |

| <b>IDs in active data set</b>                                                              | <b>Object name</b> | <b>miR-128 tgts_miRanda</b> | <b>Transcription Factor</b> | <b>IDs of corresponding network object from GeneGo network</b> | <b>Corresponding network object name</b> |
|--------------------------------------------------------------------------------------------|--------------------|-----------------------------|-----------------------------|----------------------------------------------------------------|------------------------------------------|
| 1552703_s_at;<br>206011_at;<br>209970_x_at;<br>211366_x_at;<br>211367_s_at;<br>211368_s_at | Caspase-1          | x                           |                             | 1552701_a_at;<br>1552703_s_at                                  | Pseudo-ICE                               |
| 218284_at                                                                                  | SMAD3              |                             | x                           | 218432_at;<br>229955_at                                        | Fbxo3                                    |
| 218284_at                                                                                  | SMAD3              |                             | x                           | 218667_at                                                      | Praja-1                                  |
| 218284_at                                                                                  | SMAD3              |                             | x                           | 219213_at                                                      | JAM2                                     |
| 218284_at                                                                                  | SMAD3              |                             | x                           | 219249_s_at                                                    | FKBP10                                   |
| 218284_at                                                                                  | SMAD3              |                             | x                           | 220266_s_at                                                    | KLF4                                     |
| 218284_at                                                                                  | SMAD3              |                             | x                           | 220938_s_at                                                    | GMEB1                                    |
| 218284_at                                                                                  | SMAD3              |                             | x                           | 221744_at;<br>224730_at;<br>224748_at                          | HAN11                                    |
| 218284_at                                                                                  | SMAD3              |                             | x                           | 222430_s_at                                                    | YTHDF2                                   |
| 218284_at                                                                                  | SMAD3              |                             | x                           | 223713_at                                                      | RSHL2                                    |
| 218284_at                                                                                  | SMAD3              |                             | x                           | 224164_at                                                      | TPM3                                     |
| 218284_at                                                                                  | SMAD3              |                             | x                           | 225066_at                                                      | PPP2R2D                                  |
| 218284_at                                                                                  | SMAD3              |                             | x                           | 226066_at                                                      | MITF                                     |
| 218284_at                                                                                  | SMAD3              |                             | x                           | 226563_at;<br>235598_at                                        | SMAD2                                    |
| 218284_at                                                                                  | SMAD3              |                             | x                           | 226795_at;<br>235012_at                                        | LRCH1                                    |
| 218284_at                                                                                  | SMAD3              |                             | x                           | 228942_s_at                                                    | AIP1 (DAB2ip)                            |
| 218284_at                                                                                  | SMAD3              |                             | x                           | 229399_at                                                      | C10orf118                                |
| 218284_at                                                                                  | SMAD3              |                             | x                           | 236814_at                                                      | MDM4                                     |
| 218284_at                                                                                  | SMAD3              |                             | x                           | 241922_at                                                      | LMO4                                     |
| 218284_at                                                                                  | SMAD3              |                             | x                           | 243589_at                                                      | KIAA1267                                 |
| 220671_at                                                                                  | Nocturnin          |                             |                             | 204980_at                                                      | CLOCK                                    |
| 220671_at                                                                                  | Nocturnin          |                             |                             | 208991_at;<br>208992_s_at;<br>225289_at                        | STAT3                                    |
| 220671_at                                                                                  | Nocturnin          |                             |                             | 209674_at                                                      | CRY1                                     |
| 220671_at                                                                                  | Nocturnin          |                             |                             | 211962_s_at                                                    | TISB                                     |
| 220671_at                                                                                  | Nocturnin          |                             |                             | 212695_at                                                      | CRY2                                     |
| 220671_at                                                                                  | Nocturnin          |                             |                             | 213003_s_at                                                    | C/EBPdelta                               |
| 220671_at                                                                                  | Nocturnin          |                             |                             | 225565_at;<br>225572_at                                        | CREB1                                    |
| 222040_at                                                                                  | hnRNP A1           | x                           |                             | 1554408_a_at                                                   | TK1                                      |
| 222040_at                                                                                  | hnRNP A1           | x                           |                             | 1556499_s_at;<br>202310_s_at                                   | COL1A1                                   |
| 222040_at                                                                                  | hnRNP A1           | x                           |                             | 1557278_s_at;                                                  | Karyopherin beta 2                       |

| <b>IDs in active data set</b>                                                              | <b>Object name</b> | <b>miR-128 tgts_miRanda</b> | <b>Transcription Factor</b> | <b>IDs of corresponding network object from GeneGo network</b> | <b>Corresponding network object name</b> |
|--------------------------------------------------------------------------------------------|--------------------|-----------------------------|-----------------------------|----------------------------------------------------------------|------------------------------------------|
| 1552703_s_at;<br>206011_at;<br>209970_x_at;<br>211366_x_at;<br>211367_s_at;<br>211368_s_at | Caspase-1          | x                           |                             | 1552701_a_at;<br>1552703_s_at                                  | Pseudo-ICE                               |
|                                                                                            |                    |                             |                             | 212635_at;<br>225765_at                                        |                                          |
| 222040_at                                                                                  | hnRNP A1           | x                           |                             | 200072_s_at                                                    | hnRNP M                                  |
| 222040_at                                                                                  | hnRNP A1           | x                           |                             | 200952_s_at;<br>200953_s_at                                    | Cyclin D2                                |
| 222040_at                                                                                  | hnRNP A1           | x                           |                             | 201502_s_at                                                    | NFKBIA                                   |
| 222040_at                                                                                  | hnRNP A1           | x                           |                             | 203213_at;<br>203214_x_at;<br>210559_s_at                      | CDK1 (p34)                               |
| 222040_at                                                                                  | hnRNP A1           | x                           |                             | 204739_at                                                      | CENP-C                                   |
| 222040_at                                                                                  | hnRNP A1           | x                           |                             | 204767_s_at;<br>204768_s_at                                    | FEN1                                     |
| 222040_at                                                                                  | hnRNP A1           | x                           |                             | 205192_at                                                      | NIK(MAP3K14)                             |
| 222040_at                                                                                  | hnRNP A1           | x                           |                             | 205436_s_at;<br>213344_s_at                                    | Histone H2AX                             |
| 222040_at                                                                                  | hnRNP A1           | x                           |                             | 205731_s_at;<br>205732_s_at                                    | NCOA2<br>(GRIP1/TIF2)                    |
| 222040_at                                                                                  | hnRNP A1           | x                           |                             | 206967_at                                                      | Cyclin T1                                |
| 222040_at                                                                                  | hnRNP A1           | x                           |                             | 208151_x_at;<br>208719_s_at;<br>213998_s_at                    | DDX17                                    |
| 222040_at                                                                                  | hnRNP A1           | x                           |                             | 208801_at                                                      | SRP72                                    |
| 222040_at                                                                                  | hnRNP A1           | x                           |                             | 209068_at                                                      | hnRNP D-like                             |
| 222040_at                                                                                  | hnRNP A1           | x                           |                             | 212427_at                                                      | ECM29                                    |
| 222040_at                                                                                  | hnRNP A1           | x                           |                             | 212756_s_at                                                    | UBR2                                     |
| 222040_at                                                                                  | hnRNP A1           | x                           |                             | 214639_s_at                                                    | HOXA1                                    |
| 222040_at                                                                                  | hnRNP A1           | x                           |                             | 218542_at                                                      | Cep55                                    |
| 222040_at                                                                                  | hnRNP A1           | x                           |                             | 218832_x_at                                                    | Beta-arrestin1                           |
| 222040_at                                                                                  | hnRNP A1           | x                           |                             | 220052_s_at;<br>223776_x_at                                    | TIN-2                                    |
| 222040_at                                                                                  | hnRNP A1           | x                           |                             | 220613_s_at                                                    | SYTL2                                    |
| 222040_at                                                                                  | hnRNP A1           | x                           |                             | 221264_s_at                                                    | TARDBP (TDP43)                           |
| 222040_at                                                                                  | hnRNP A1           | x                           |                             | 222430_s_at                                                    | YTHDF2                                   |
| 222040_at                                                                                  | hnRNP A1           | x                           |                             | 222749_at                                                      | SUFU                                     |
| 222040_at                                                                                  | hnRNP A1           | x                           |                             | 223679_at                                                      | Beta-catenin                             |
| 222040_at                                                                                  | hnRNP A1           | x                           |                             | 225310_at                                                      | hnRNP-G                                  |
| 222040_at                                                                                  | hnRNP A1           | x                           |                             | 226404_at                                                      | CAPER                                    |
| 222040_at                                                                                  | hnRNP A1           | x                           |                             | 226921_at                                                      | UBR1                                     |



| <b>IDs in active data set</b>                                                              | <b>Object name</b> | <b>miR-128 tgts_miRanda</b> | <b>Transcription Factor</b> | <b>IDs of corresponding network object from GeneGo network</b> | <b>Corresponding network object name</b> |
|--------------------------------------------------------------------------------------------|--------------------|-----------------------------|-----------------------------|----------------------------------------------------------------|------------------------------------------|
| 1552703_s_at;<br>206011_at;<br>209970_x_at;<br>211366_x_at;<br>211367_s_at;<br>211368_s_at | Caspase-1          | x                           |                             | 1552701_a_at;<br>1552703_s_at                                  | Pseudo-ICE                               |
| 223679_at                                                                                  | Beta-catenin       |                             |                             | 1553764_a_at;<br>225806_at                                     | Ajuba                                    |
| 223679_at                                                                                  | Beta-catenin       |                             | x                           | 1554168_a_at;<br>223082_at;<br>235692_at                       | CIN85                                    |
| 223679_at                                                                                  | Beta-catenin       |                             | x                           | 1557141_at                                                     | INMT                                     |
| 223679_at                                                                                  | Beta-catenin       |                             | x                           | 1559946_s_at;<br>201459_at                                     | RUVBL2                                   |
| 223679_at                                                                                  | Beta-catenin       |                             | x                           | 1565034_s_at                                                   | MLL1 (HRX)                               |
| 223679_at                                                                                  | Beta-catenin       |                             | x                           | 1565717_s_at                                                   | LXR-alpha                                |
| 223679_at                                                                                  | Beta-catenin       |                             | x                           | 1565717_s_at                                                   | FUS                                      |
| 223679_at                                                                                  | Beta-catenin       |                             | x                           | 200072_s_at                                                    | hnRNP M                                  |
| 223679_at                                                                                  | Beta-catenin       |                             | x                           | 200632_s_at                                                    | NDRG1                                    |
| 223679_at                                                                                  | Beta-catenin       |                             | x                           | 200711_s_at;<br>200719_at                                      | SKP1                                     |
| 223679_at                                                                                  | Beta-catenin       |                             | x                           | 200952_s_at;<br>200953_s_at                                    | Cyclin D2                                |
| 223679_at                                                                                  | Beta-catenin       |                             | x                           | 201087_at;<br>211823_s_at                                      | Paxillin                                 |
| 223679_at                                                                                  | Beta-catenin       |                             | x                           | 201693_s_at;<br>201694_s_at;<br>227404_s_at                    | EGR1                                     |
| 223679_at                                                                                  | Beta-catenin       |                             | x                           | 201841_s_at                                                    | HSP27                                    |
| 223679_at                                                                                  | Beta-catenin       |                             | x                           | 201908_at                                                      | DVL-3                                    |
| 223679_at                                                                                  | Beta-catenin       |                             | x                           | 202094_at;<br>202095_s_at                                      | Survivin                                 |
| 223679_at                                                                                  | Beta-catenin       |                             | x                           | 202240_at                                                      | PLK1                                     |
| 223679_at                                                                                  | Beta-catenin       |                             | x                           | 202313_at                                                      | PPP2R2A                                  |
| 223679_at                                                                                  | Beta-              |                             | x                           | 202360_at                                                      | MAML1                                    |

| <b>IDs in active data set</b>                                                              | <b>Object name</b> | <b>miR-128 tgts_miRanda</b> | <b>Transcription Factor</b> | <b>IDs of corresponding network object from GeneGo network</b> | <b>Corresponding network object name</b> |
|--------------------------------------------------------------------------------------------|--------------------|-----------------------------|-----------------------------|----------------------------------------------------------------|------------------------------------------|
| 1552703_s_at;<br>206011_at;<br>209970_x_at;<br>211366_x_at;<br>211367_s_at;<br>211368_s_at | Caspase-1          | x                           |                             | 1552701_a_at;<br>1552703_s_at                                  | Pseudo-ICE                               |
|                                                                                            | catenin            |                             |                             |                                                                |                                          |
| 223679_at                                                                                  | Beta-catenin       |                             | x                           | 202580_x_at                                                    | FOXM1                                    |
| 223679_at                                                                                  | Beta-catenin       |                             | x                           | 203065_s_at;<br>212097_at                                      | Caveolin-1                               |
| 223679_at                                                                                  | Beta-catenin       |                             | x                           | 203220_s_at;<br>203222_s_at                                    | TLE1                                     |
| 223679_at                                                                                  | Beta-catenin       |                             | x                           | 203408_s_at                                                    | SATB1                                    |
| 223679_at                                                                                  | Beta-catenin       |                             | x                           | 203431_s_at                                                    | p200RhoGAP                               |
| 223679_at                                                                                  | Beta-catenin       |                             | x                           | 204254_s_at;<br>204255_s_at;<br>213692_s_at                    | VDR                                      |
| 223679_at                                                                                  | Beta-catenin       |                             | x                           | 204466_s_at;<br>207827_x_at;<br>211546_x_at                    | Alpha-synuclein                          |
| 223679_at                                                                                  | Beta-catenin       |                             | x                           | 204609_at                                                      | DIPA                                     |
| 223679_at                                                                                  | Beta-catenin       |                             | x                           | 204641_at;<br>211080_s_at                                      | Nek2A                                    |
| 223679_at                                                                                  | Beta-catenin       |                             | x                           | 204654_s_at                                                    | AP-2A                                    |
| 223679_at                                                                                  | Beta-catenin       |                             | x                           | 204760_s_at;<br>31637_s_at                                     | TR-alpha                                 |
| 223679_at                                                                                  | Beta-catenin       |                             | x                           | 204920_at;<br>217564_s_at                                      | CPSM                                     |
| 223679_at                                                                                  | Beta-catenin       |                             | x                           | 204933_s_at                                                    | Osteoprotegerin                          |
| 223679_at                                                                                  | Beta-catenin       |                             | x                           | 205731_s_at;<br>205732_s_at                                    | NCOA2<br>(GRIP1/TIF2)                    |
| 223679_at                                                                                  | Beta-catenin       |                             | x                           | 205880_at                                                      | PKC-mu                                   |
| 223679_at                                                                                  | Beta-catenin       |                             | x                           | 206412_at                                                      | Fer                                      |
| 223679_at                                                                                  | Beta-catenin       |                             | x                           | 206492_at                                                      | FHIT                                     |
| 223679_at                                                                                  | Beta-catenin       |                             | x                           | 206846_s_at                                                    | HDAC6                                    |

| <b>IDs in active data set</b>                                                              | <b>Object name</b> | <b>miR-128 tgts_miRanda</b> | <b>Transcription Factor</b> | <b>IDs of corresponding network object from GeneGo network</b>        | <b>Corresponding network object name</b> |
|--------------------------------------------------------------------------------------------|--------------------|-----------------------------|-----------------------------|-----------------------------------------------------------------------|------------------------------------------|
| 1552703_s_at;<br>206011_at;<br>209970_x_at;<br>211366_x_at;<br>211367_s_at;<br>211368_s_at | Caspase-1          | x                           |                             | 1552701_a_at;<br>1552703_s_at                                         | Pseudo-ICE                               |
| 223679_at                                                                                  | Beta-catenin       |                             | x                           | 208865_at;<br>208866_at;<br>208867_s_at                               | Casein kinase I alpha                    |
| 223679_at                                                                                  | Beta-catenin       |                             | x                           | 209002_s_at                                                           | CALCOCO1                                 |
| 223679_at                                                                                  | Beta-catenin       |                             | x                           | 209311_at                                                             | Bcl-W                                    |
| 223679_at                                                                                  | Beta-catenin       |                             | x                           | 209341_s_at                                                           | IKK-beta                                 |
| 223679_at                                                                                  | Beta-catenin       |                             | x                           | 209466_x_at;<br>211737_x_at                                           | Pleiotrophin (OSF1)                      |
| 223679_at                                                                                  | Beta-catenin       |                             | x                           | 209753_s_at                                                           | TMPOB                                    |
| 223679_at                                                                                  | Beta-catenin       |                             | x                           | 209938_at;<br>210537_s_at                                             | ADA2                                     |
| 223679_at                                                                                  | Beta-catenin       |                             | x                           | 210173_at;<br>214137_at;<br>227396_at                                 | DEP-1                                    |
| 223679_at                                                                                  | Beta-catenin       |                             | x                           | 210248_at                                                             | WNT7A                                    |
| 223679_at                                                                                  | Beta-catenin       |                             | x                           | 210426_x_at;<br>210479_s_at;<br>226682_at;<br>235567_at;<br>236266_at | ROR-alpha                                |
| 223679_at                                                                                  | Beta-catenin       |                             | x                           | 210477_x_at;<br>226048_at                                             | JNK1(MAPK8)                              |
| 223679_at                                                                                  | Beta-catenin       |                             | x                           | 210512_s_at;<br>211527_x_at                                           | VEGF-A                                   |
| 223679_at                                                                                  | Beta-catenin       |                             | x                           | 211711_s_at;<br>242622_x_at                                           | PTEN                                     |
| 223679_at                                                                                  | Beta-catenin       |                             | x                           | 212037_at                                                             | Pinin                                    |
| 223679_at                                                                                  | Beta-catenin       |                             | x                           | 212287_at                                                             | SUZ12                                    |
| 223679_at                                                                                  | Beta-catenin       |                             | x                           | 212556_at                                                             | SCRIB                                    |
| 223679_at                                                                                  | Beta-catenin       |                             | x                           | 213005_s_at                                                           | ANKRD15                                  |

| <b>IDs in active data set</b>                                                              | <b>Object name</b> | <b>miR-128 tgts_miRanda</b> | <b>Transcription Factor</b> | <b>IDs of corresponding network object from GeneGo network</b> | <b>Corresponding network object name</b> |
|--------------------------------------------------------------------------------------------|--------------------|-----------------------------|-----------------------------|----------------------------------------------------------------|------------------------------------------|
| 1552703_s_at;<br>206011_at;<br>209970_x_at;<br>211366_x_at;<br>211367_s_at;<br>211368_s_at | Caspase-1          | x                           |                             | 1552701_a_at;<br>1552703_s_at                                  | Pseudo-ICE                               |
| 223679_at                                                                                  | Beta-catenin       |                             | x                           | 213324_at                                                      | c-Src                                    |
| 223679_at                                                                                  | Beta-catenin       |                             | x                           | 214881_s_at                                                    | UBF                                      |
| 223679_at                                                                                  | Beta-catenin       |                             | x                           | 215273_s_at                                                    | ADA3-like protein                        |
| 223679_at                                                                                  | Beta-catenin       |                             | x                           | 215520_at                                                      | PYGO1                                    |
| 223679_at                                                                                  | Beta-catenin       |                             | x                           | 217941_s_at;<br>222473_s_at                                    | ERBIN                                    |
| 223679_at                                                                                  | Beta-catenin       |                             | x                           | 218264_at                                                      | BCCIP                                    |
| 223679_at                                                                                  | Beta-catenin       |                             | x                           | 218284_at                                                      | SMAD3                                    |
| 223679_at                                                                                  | Beta-catenin       |                             | x                           | 219179_at                                                      | DACT1                                    |
| 223679_at                                                                                  | Beta-catenin       |                             | x                           | 219908_at                                                      | DKK2                                     |
| 223679_at                                                                                  | Beta-catenin       |                             | x                           | 220266_s_at                                                    | KLF4                                     |
| 223679_at                                                                                  | Beta-catenin       |                             | x                           | 222749_at                                                      | SUFU                                     |
| 223679_at                                                                                  | Beta-catenin       |                             | x                           | 223111_x_at                                                    | ARID4B                                   |
| 223679_at                                                                                  | Beta-catenin       |                             | x                           | 223376_s_at                                                    | Brain protein I3                         |
| 223679_at                                                                                  | Beta-catenin       |                             | x                           | 224013_s_at                                                    | SOX7                                     |
| 223679_at                                                                                  | Beta-catenin       |                             | x                           | 224889_at;<br>231548_at                                        | FOXO3A                                   |
| 223679_at                                                                                  | Beta-catenin       |                             | x                           | 224994_at                                                      | CaMK II delta                            |
| 223679_at                                                                                  | Beta-catenin       |                             | x                           | 225310_at                                                      | hnRNP-G                                  |
| 223679_at                                                                                  | Beta-catenin       |                             | x                           | 225712_at                                                      | Gemin5                                   |
| 223679_at                                                                                  | Beta-catenin       |                             | x                           | 226066_at                                                      | MITF                                     |
| 223679_at                                                                                  | Beta-              |                             | x                           | 226115_at                                                      | ELYS                                     |

| <b>IDs in active data set</b>                                                              | <b>Object name</b> | <b>miR-128 tgts_miRanda</b> | <b>Transcription Factor</b> | <b>IDs of corresponding network object from GeneGo network</b> | <b>Corresponding network object name</b> |
|--------------------------------------------------------------------------------------------|--------------------|-----------------------------|-----------------------------|----------------------------------------------------------------|------------------------------------------|
| 1552703_s_at;<br>206011_at;<br>209970_x_at;<br>211366_x_at;<br>211367_s_at;<br>211368_s_at | Caspase-1          | x                           |                             | 1552701_a_at;<br>1552703_s_at                                  | Pseudo-ICE                               |
|                                                                                            | catenin            |                             |                             |                                                                |                                          |
| 223679_at                                                                                  | Beta-catenin       |                             | x                           | 226404_at                                                      | CAPER                                    |
| 223679_at                                                                                  | Beta-catenin       |                             | x                           | 226563_at;<br>235598_at                                        | SMAD2                                    |
| 223679_at                                                                                  | Beta-catenin       |                             | x                           | 227395_at;<br>231997_at                                        | TBCEL                                    |
| 223679_at                                                                                  | Beta-catenin       |                             | x                           | 227892_at;<br>240349_at                                        | AMPK alpha 2 subunit                     |
| 223679_at                                                                                  | Beta-catenin       |                             | x                           | 228065_at                                                      | BCL9-2                                   |
| 223679_at                                                                                  | Beta-catenin       |                             | x                           | 229500_at                                                      | HUEL                                     |
| 223679_at                                                                                  | Beta-catenin       |                             | x                           | 230229_at                                                      | SAP97 (DLG1)                             |
| 223679_at                                                                                  | Beta-catenin       |                             | x                           | 230821_at                                                      | ZNF148                                   |
| 223679_at                                                                                  | Beta-catenin       |                             | x                           | 230943_at                                                      | SOX17                                    |
| 223679_at                                                                                  | Beta-catenin       |                             | x                           | 233633_at                                                      | TBLR1 (DC42)                             |
| 223679_at                                                                                  | Beta-catenin       |                             | x                           | 238285_at                                                      | SOX5                                     |
| 224889_at;<br>231548_at                                                                    | FOXO3A             |                             | x                           | 1555832_s_at                                                   | KLF6                                     |
| 224889_at;<br>231548_at                                                                    | FOXO3A             |                             | x                           | 1565717_s_at                                                   | LXR-alpha                                |
| 224889_at;<br>231548_at                                                                    | FOXO3A             |                             | x                           | 1568765_at;<br>202627_s_at;<br>202628_s_at                     | PAI1                                     |
| 224889_at;<br>231548_at                                                                    | FOXO3A             |                             | x                           | 1570352_at                                                     | ATM                                      |
| 224889_at;<br>231548_at                                                                    | FOXO3A             |                             | x                           | 200894_s_at;<br>200895_s_at                                    | FKBP4                                    |
| 224889_at;<br>231548_at                                                                    | FOXO3A             |                             | x                           | 201008_s_at;<br>201009_s_at;<br>201010_s_at                    | TXNIP (VDUP1)                            |
| 224889_at;<br>231548_at                                                                    | FOXO3A             |                             | x                           | 202240_at                                                      | PLK1                                     |

| <b>IDs in active data set</b>                                                              | <b>Object name</b> | <b>miR-128 tgts_miRanda</b> | <b>Transcription Factor</b> | <b>IDs of corresponding network object from GeneGo network</b> | <b>Corresponding network object name</b> |
|--------------------------------------------------------------------------------------------|--------------------|-----------------------------|-----------------------------|----------------------------------------------------------------|------------------------------------------|
| 1552703_s_at;<br>206011_at;<br>209970_x_at;<br>211366_x_at;<br>211367_s_at;<br>211368_s_at | Caspase-1          | x                           |                             | 1552701_a_at;<br>1552703_s_at                                  | Pseudo-ICE                               |
| 224889_at;<br>231548_at                                                                    | FOXO3A             |                             | x                           | 202580_x_at                                                    | FOXO1                                    |
| 224889_at;<br>231548_at                                                                    | FOXO3A             |                             | x                           | 203010_at                                                      | STAT5A                                   |
| 224889_at;<br>231548_at                                                                    | FOXO3A             |                             | x                           | 203065_s_at;<br>212097_at                                      | Caveolin-1                               |
| 224889_at;<br>231548_at                                                                    | FOXO3A             |                             | x                           | 203220_s_at;<br>203222_s_at                                    | TLE1                                     |
| 224889_at;<br>231548_at                                                                    | FOXO3A             |                             | x                           | 206649_s_at                                                    | TFE3                                     |
| 224889_at;<br>231548_at                                                                    | FOXO3A             |                             | x                           | 207181_s_at                                                    | Caspase-7                                |
| 224889_at;<br>231548_at                                                                    | FOXO3A             |                             | x                           | 207980_s_at;<br>209357_at                                      | CITED2                                   |
| 224889_at;<br>231548_at                                                                    | FOXO3A             |                             | x                           | 208763_s_at                                                    | DSIPI (GILZ)                             |
| 224889_at;<br>231548_at                                                                    | FOXO3A             |                             | x                           | 208786_s_at                                                    | MAP1LC3B                                 |
| 224889_at;<br>231548_at                                                                    | FOXO3A             |                             | x                           | 208997_s_at                                                    | UCP2                                     |
| 224889_at;<br>231548_at                                                                    | FOXO3A             |                             | x                           | 209077_at                                                      | MT-TRX                                   |
| 224889_at;<br>231548_at                                                                    | FOXO3A             |                             | x                           | 209341_s_at                                                    | IKK-beta                                 |
| 224889_at;<br>231548_at                                                                    | FOXO3A             |                             | x                           | 212426_s_at                                                    | 14-3-3 theta                             |
| 224889_at;<br>231548_at                                                                    | FOXO3A             |                             | x                           | 212549_at                                                      | STAT5B                                   |
| 224889_at;<br>231548_at                                                                    | FOXO3A             |                             | x                           | 212607_at;<br>212609_s_at;<br>219393_s_at;<br>222880_at        | AKT3                                     |
| 224889_at;<br>231548_at                                                                    | FOXO3A             |                             | x                           | 213376_at                                                      | ZBTB1                                    |
| 224889_at;<br>231548_at                                                                    | FOXO3A             |                             | x                           | 217542_at                                                      | MDM2                                     |
| 224889_at;<br>231548_at                                                                    | FOXO3A             |                             | x                           | 218284_at                                                      | SMAD3                                    |
| 224889_at;                                                                                 | FOXO3A             |                             | x                           | 220266_s_at                                                    | KLF4                                     |

| <b>IDs in active data set</b>                                                              | <b>Object name</b> | <b>miR-128 tgts_miRanda</b> | <b>Transcription Factor</b> | <b>IDs of corresponding network object from GeneGo network</b> | <b>Corresponding network object name</b> |
|--------------------------------------------------------------------------------------------|--------------------|-----------------------------|-----------------------------|----------------------------------------------------------------|------------------------------------------|
| 1552703_s_at;<br>206011_at;<br>209970_x_at;<br>211366_x_at;<br>211367_s_at;<br>211368_s_at | Caspase-1          | x                           |                             | 1552701_a_at;<br>1552703_s_at                                  | Pseudo-ICE                               |
| 231548_at                                                                                  |                    |                             |                             |                                                                |                                          |
| 224889_at;<br>231548_at                                                                    | FOXO3A             |                             | x                           | 221478_at                                                      | NIX                                      |
| 224889_at;<br>231548_at                                                                    | FOXO3A             |                             | x                           | 221562_s_at                                                    | Sirtuin3                                 |
| 224889_at;<br>231548_at                                                                    | FOXO3A             |                             | x                           | 221986_s_at;<br>226158_at;<br>242088_at                        | KLHL24                                   |
| 224889_at;<br>231548_at                                                                    | FOXO3A             |                             | x                           | 225878_at                                                      | KIF1B                                    |
| 224889_at;<br>231548_at                                                                    | FOXO3A             |                             | x                           | 226563_at;<br>235598_at                                        | SMAD2                                    |
| 224917_at                                                                                  | microRNA 21        |                             |                             | 1558532_at                                                     | Tropomyosin-1                            |
| 224917_at                                                                                  | microRNA 21        |                             |                             | 200787_s_at;<br>200788_s_at                                    | PEA15                                    |
| 224917_at                                                                                  | microRNA 21        |                             |                             | 201147_s_at;<br>201149_s_at;<br>201150_s_at                    | TIMP3                                    |
| 224917_at                                                                                  | microRNA 21        |                             |                             | 201489_at;<br>201490_s_at                                      | Ppif                                     |
| 224917_at                                                                                  | microRNA 21        |                             |                             | 201669_s_at;<br>201670_s_at;<br>213002_at;<br>225897_at        | MARCKS                                   |
| 224917_at                                                                                  | microRNA 21        |                             |                             | 201862_s_at                                                    | LRRFIP1                                  |
| 224917_at                                                                                  | microRNA 21        |                             |                             | 202677_at                                                      | p120GAP                                  |
| 224917_at                                                                                  | microRNA 21        |                             |                             | 203796_s_at                                                    | BCL7A                                    |
| 224917_at                                                                                  | microRNA 21        |                             |                             | 204011_at                                                      | SPRY2                                    |
| 224917_at                                                                                  | microRNA 21        |                             |                             | 204270_at                                                      | Ski                                      |
| 224917_at                                                                                  | microRNA 21        |                             |                             | 207828_s_at;<br>209172_s_at                                    | CENP-F                                   |
| 224917_at                                                                                  | microRNA 21        |                             |                             | 208991_at;<br>208992_s_at;                                     | STAT3                                    |

| <b>IDs in active data set</b>                                                              | <b>Object name</b> | <b>miR-128 tgts_miRanda</b> | <b>Transcription Factor</b> | <b>IDs of corresponding network object from GeneGo network</b> | <b>Corresponding network object name</b> |
|--------------------------------------------------------------------------------------------|--------------------|-----------------------------|-----------------------------|----------------------------------------------------------------|------------------------------------------|
| 1552703_s_at;<br>206011_at;<br>209970_x_at;<br>211366_x_at;<br>211367_s_at;<br>211368_s_at | Caspase-1          | x                           |                             | 1552701_a_at;<br>1552703_s_at                                  | Pseudo-ICE                               |
|                                                                                            |                    |                             |                             | 225289_at                                                      |                                          |
| 224917_at                                                                                  | microRNA 21        |                             |                             | 211711_s_at;<br>242622_x_at                                    | PTEN                                     |
| 224917_at                                                                                  | microRNA 21        |                             |                             | 212594_at                                                      | PDCD4                                    |
| 224917_at                                                                                  | microRNA 21        |                             |                             | 212888_at;<br>213229_at                                        | Dicer                                    |
| 224917_at                                                                                  | microRNA 21        |                             |                             | 213032_at;<br>213033_s_at                                      | NFIB                                     |
| 224917_at                                                                                  | microRNA 21        |                             |                             | 213348_at                                                      | p57                                      |
| 224917_at                                                                                  | microRNA 21        |                             |                             | 218039_at                                                      | NUSAP1                                   |
| 224917_at                                                                                  | microRNA 21        |                             |                             | 218284_at                                                      | SMAD3                                    |
| 224917_at                                                                                  | microRNA 21        |                             |                             | 218662_s_at                                                    | CAP-G                                    |
| 224917_at                                                                                  | microRNA 21        |                             |                             | 218883_s_at                                                    | CENP-50                                  |
| 224917_at                                                                                  | microRNA 21        |                             |                             | 224889_at;<br>231548_at                                        | FOXO3A                                   |
| 224986_s_at                                                                                | PDK (PDPK1)        |                             |                             | 202458_at;<br>226279_at;<br>229441_at                          | PRSS23                                   |
| 224986_s_at                                                                                | PDK (PDPK1)        |                             |                             | 202670_at                                                      | MEK1(MAP2K1)                             |
| 224986_s_at                                                                                | PDK (PDPK1)        |                             |                             | 203065_s_at;<br>212097_at                                      | Caveolin-1                               |
| 224986_s_at                                                                                | PDK (PDPK1)        |                             |                             | 206204_at                                                      | GRB14                                    |
| 224986_s_at                                                                                | PDK (PDPK1)        |                             |                             | 208010_s_at                                                    | 70Z-PEP                                  |
| 224986_s_at                                                                                | PDK (PDPK1)        |                             |                             | 209341_s_at                                                    | IKK-beta                                 |
| 224986_s_at                                                                                | PDK (PDPK1)        |                             |                             | 210173_at;<br>214137_at;<br>227396_at                          | DEP-1                                    |
| 224986_s_at                                                                                | PDK (PDPK1)        |                             |                             | 210477_x_at;<br>226048_at                                      | JNK1(MAPK8)                              |



| <b>IDs in active data set</b>                                                              | <b>Object name</b> | <b>miR-128 tgts_miRanda</b> | <b>Transcription Factor</b> | <b>IDs of corresponding network object from GeneGo network</b> | <b>Corresponding network object name</b> |
|--------------------------------------------------------------------------------------------|--------------------|-----------------------------|-----------------------------|----------------------------------------------------------------|------------------------------------------|
| 1552703_s_at;<br>206011_at;<br>209970_x_at;<br>211366_x_at;<br>211367_s_at;<br>211368_s_at | Caspase-1          | x                           |                             | 1552701_a_at;<br>1552703_s_at                                  | Pseudo-ICE                               |
| 224986_s_at                                                                                | PDK<br>(PDPK1)     |                             |                             | 210538_s_at                                                    | c-IAP2                                   |
| 224986_s_at                                                                                | PDK<br>(PDPK1)     |                             |                             | 211995_x_at;<br>212988_x_at                                    | Actin cytoplasmic 2                      |
| 224986_s_at                                                                                | PDK<br>(PDPK1)     |                             |                             | 212037_at                                                      | Pinin                                    |
| 224986_s_at                                                                                | PDK<br>(PDPK1)     |                             |                             | 212426_s_at                                                    | 14-3-3 theta                             |
| 224986_s_at                                                                                | PDK<br>(PDPK1)     |                             |                             | 212685_s_at                                                    | TBL2                                     |
| 224986_s_at                                                                                | PDK<br>(PDPK1)     |                             |                             | 212724_at                                                      | RhoE                                     |
| 224986_s_at                                                                                | PDK<br>(PDPK1)     |                             |                             | 213324_at                                                      | c-Src                                    |
| 224986_s_at                                                                                | PDK<br>(PDPK1)     |                             |                             | 218284_at                                                      | SMAD3                                    |
| 224986_s_at                                                                                | PDK<br>(PDPK1)     |                             |                             | 218373_at;<br>223894_s_at                                      | FTS                                      |
| 224986_s_at                                                                                | PDK<br>(PDPK1)     |                             |                             | 220038_at                                                      | SGK3                                     |
| 224986_s_at                                                                                | PDK<br>(PDPK1)     |                             |                             | 224889_at;<br>231548_at                                        | FOXO3A                                   |
| 224986_s_at                                                                                | PDK<br>(PDPK1)     |                             |                             | 226563_at;<br>235598_at                                        | SMAD2                                    |
| 224986_s_at                                                                                | PDK<br>(PDPK1)     |                             |                             | 226660_at                                                      | p70 S6 kinase1                           |
| 225198_at                                                                                  | VAPA               |                             |                             | 1565483_at                                                     | EGFR                                     |
| 225198_at                                                                                  | VAPA               |                             |                             | 201626_at                                                      | INSIG1                                   |
| 225198_at                                                                                  | VAPA               |                             |                             | 201693_s_at;<br>201694_s_at;<br>227404_s_at                    | EGR1                                     |
| 225198_at                                                                                  | VAPA               |                             |                             | 202395_at                                                      | NSF                                      |
| 225198_at                                                                                  | VAPA               |                             |                             | 203952_at                                                      | ATF-6 alpha                              |
| 225198_at                                                                                  | VAPA               |                             |                             | 204466_s_at;<br>207827_x_at;<br>211546_x_at                    | Alpha-synuclein                          |
| 225198_at                                                                                  | VAPA               |                             |                             | 208078_s_at                                                    | SIK                                      |
| 225198_at                                                                                  | VAPA               |                             |                             | 209925_at                                                      | Occludin                                 |
| 225198_at                                                                                  | VAPA               |                             |                             | 213326_at                                                      | VAMPI                                    |

| <b>IDs in active data set</b>                                                              | <b>Object name</b> | <b>miR-128 tgts_miRanda</b> | <b>Transcription Factor</b> | <b>IDs of corresponding network object from GeneGo network</b> | <b>Corresponding network object name</b> |
|--------------------------------------------------------------------------------------------|--------------------|-----------------------------|-----------------------------|----------------------------------------------------------------|------------------------------------------|
| 1552703_s_at;<br>206011_at;<br>209970_x_at;<br>211366_x_at;<br>211367_s_at;<br>211368_s_at | Caspase-1          | x                           |                             | 1552701_a_at;<br>1552703_s_at                                  | Pseudo-ICE                               |
| 225198_at                                                                                  | VAPA               |                             |                             | 225218_at                                                      | Protrudin                                |
| 225198_at                                                                                  | VAPA               |                             |                             | 225565_at;<br>225572_at                                        | CREB1                                    |
| 225399_at                                                                                  | Sen15              |                             |                             | 1566151_at;<br>204370_at                                       | Clp1                                     |
| 225399_at                                                                                  | Sen15              |                             |                             | 218132_s_at                                                    | Sen34                                    |
| 225399_at                                                                                  | Sen15              |                             |                             | 218837_s_at                                                    | UBE2D4                                   |
| 225399_at                                                                                  | Sen15              |                             |                             | 241402_at                                                      | Sen54                                    |
| 225399_at                                                                                  | Sen15              |                             |                             | 241922_at                                                      | LMO4                                     |
| 225565_at;<br>225572_at                                                                    | CREB1              |                             | x                           | 1553402_a_at                                                   | HLA-H                                    |
| 225565_at;<br>225572_at                                                                    | CREB1              |                             | x                           | 1554503_a_at                                                   | OSCAR                                    |
| 225565_at;<br>225572_at                                                                    | CREB1              |                             | x                           | 1555279_at;<br>1555281_x_at;<br>219094_at                      | ARMC8                                    |
| 225565_at;<br>225572_at                                                                    | CREB1              |                             | x                           | 1558111_at;<br>235879_at                                       | MBNL1                                    |
| 225565_at;<br>225572_at                                                                    | CREB1              |                             | x                           | 1558199_at                                                     | Fibronectin                              |
| 225565_at;<br>225572_at                                                                    | CREB1              |                             | x                           | 1558233_s_at;<br>1565269_s_at                                  | ATF-1                                    |
| 225565_at;<br>225572_at                                                                    | CREB1              |                             | x                           | 1559548_at;<br>220028_at;<br>236126_at                         | ActRIIB                                  |
| 225565_at;<br>225572_at                                                                    | CREB1              |                             | x                           | 1560916_a_at;<br>212792_at                                     | DPY19L1                                  |
| 225565_at;<br>225572_at                                                                    | CREB1              |                             | x                           | 1568574_x_at                                                   | Osteopontin                              |
| 225565_at;<br>225572_at                                                                    | CREB1              |                             | x                           | 1568765_at;<br>202627_s_at;<br>202628_s_at                     | PAI1                                     |
| 225565_at;<br>225572_at                                                                    | CREB1              |                             | x                           | 1568856_at;<br>1568857_a_at;<br>201383_s_at;<br>201384_s_at    | NBR1                                     |
| 225565_at;<br>225572_at                                                                    | CREB1              |                             | x                           | 1570352_at                                                     | ATM                                      |
| 225565_at;                                                                                 | CREB1              |                             | x                           | 200726_at                                                      | PP1-cat gamma                            |

| <b>IDs in active data set</b>                                                              | <b>Object name</b> | <b>miR-128 tgts_miRanda</b> | <b>Transcription Factor</b> | <b>IDs of corresponding network object from GeneGo network</b>            | <b>Corresponding network object name</b> |
|--------------------------------------------------------------------------------------------|--------------------|-----------------------------|-----------------------------|---------------------------------------------------------------------------|------------------------------------------|
| 1552703_s_at;<br>206011_at;<br>209970_x_at;<br>211366_x_at;<br>211367_s_at;<br>211368_s_at | Caspase-1          | x                           |                             | 1552701_a_at;<br>1552703_s_at                                             | Pseudo-ICE                               |
| 225572_at                                                                                  |                    |                             |                             |                                                                           |                                          |
| 225565_at;<br>225572_at                                                                    | CREB1              |                             | x                           | 200787_s_at;<br>200788_s_at                                               | PEA15                                    |
| 225565_at;<br>225572_at                                                                    | CREB1              |                             | x                           | 200790_at                                                                 | DCOR                                     |
| 225565_at;<br>225572_at                                                                    | CREB1              |                             | x                           | 200952_s_at;<br>200953_s_at                                               | Cyclin D2                                |
| 225565_at;<br>225572_at                                                                    | CREB1              |                             | x                           | 201147_s_at;<br>201149_s_at;<br>201150_s_at                               | TIMP3                                    |
| 225565_at;<br>225572_at                                                                    | CREB1              |                             | x                           | 201313_at                                                                 | ENO2                                     |
| 225565_at;<br>225572_at                                                                    | CREB1              |                             | x                           | 201487_at;<br>225647_s_at                                                 | Cathepsin C                              |
| 225565_at;<br>225572_at                                                                    | CREB1              |                             | x                           | 201693_s_at;<br>201694_s_at;<br>227404_s_at                               | EGR1                                     |
| 225565_at;<br>225572_at                                                                    | CREB1              |                             | x                           | 201882_x_at;<br>201883_s_at;<br>211631_x_at;<br>216627_s_at;<br>229403_at | B4GT1                                    |
| 225565_at;<br>225572_at                                                                    | CREB1              |                             | x                           | 202068_s_at                                                               | LDLR                                     |
| 225565_at;<br>225572_at                                                                    | CREB1              |                             | x                           | 202130_at                                                                 | RIOK3                                    |
| 225565_at;<br>225572_at                                                                    | CREB1              |                             | x                           | 202149_at;<br>202150_s_at                                                 | CAS-L                                    |
| 225565_at;<br>225572_at                                                                    | CREB1              |                             | x                           | 202241_at;<br>235641_at                                                   | C8FW (GIG2)                              |
| 225565_at;<br>225572_at                                                                    | CREB1              |                             | x                           | 202260_s_at                                                               | MUNC18                                   |
| 225565_at;<br>225572_at                                                                    | CREB1              |                             | x                           | 202314_at                                                                 | CYP51A1                                  |
| 225565_at;<br>225572_at                                                                    | CREB1              |                             | x                           | 202360_at                                                                 | MAML1                                    |
| 225565_at;<br>225572_at                                                                    | CREB1              |                             | x                           | 202380_s_at                                                               | NKTR                                     |
| 225565_at;                                                                                 | CREB1              |                             | x                           | 202519_at;                                                                | MLXIP                                    |

| <b>IDs in active data set</b>                                                              | <b>Object name</b> | <b>miR-128 tgts_miRanda</b> | <b>Transcription Factor</b> | <b>IDs of corresponding network object from GeneGo network</b> | <b>Corresponding network object name</b> |
|--------------------------------------------------------------------------------------------|--------------------|-----------------------------|-----------------------------|----------------------------------------------------------------|------------------------------------------|
| 1552703_s_at;<br>206011_at;<br>209970_x_at;<br>211366_x_at;<br>211367_s_at;<br>211368_s_at | Caspase-1          | x                           |                             | 1552701_a_at;<br>1552703_s_at                                  | Pseudo-ICE                               |
| 225572_at                                                                                  |                    |                             |                             | 225157_at                                                      |                                          |
| 225565_at;<br>225572_at                                                                    | CREB1              |                             | x                           | 202637_s_at;<br>202638_s_at;<br>215485_s_at                    | ICAM1                                    |
| 225565_at;<br>225572_at                                                                    | CREB1              |                             | x                           | 202672_s_at                                                    | ATF-3                                    |
| 225565_at;<br>225572_at                                                                    | CREB1              |                             | x                           | 202704_at                                                      | Tob1                                     |
| 225565_at;<br>225572_at                                                                    | CREB1              |                             | x                           | 202728_s_at                                                    | LTBP1                                    |
| 225565_at;<br>225572_at                                                                    | CREB1              |                             | x                           | 203010_at                                                      | STAT5A                                   |
| 225565_at;<br>225572_at                                                                    | CREB1              |                             | x                           | 203146_s_at;<br>238569_at                                      | GBR1                                     |
| 225565_at;<br>225572_at                                                                    | CREB1              |                             | x                           | 203455_s_at;<br>210592_s_at;<br>213988_s_at                    | SSAT                                     |
| 225565_at;<br>225572_at                                                                    | CREB1              |                             | x                           | 203502_at                                                      | PMGE                                     |
| 225565_at;<br>225572_at                                                                    | CREB1              |                             | x                           | 203504_s_at;<br>203505_at;<br>216066_at                        | ABCA1                                    |
| 225565_at;<br>225572_at                                                                    | CREB1              |                             | x                           | 203655_at                                                      | XRCC1                                    |
| 225565_at;<br>225572_at                                                                    | CREB1              |                             | x                           | 203856_at                                                      | VRK1                                     |
| 225565_at;<br>225572_at                                                                    | CREB1              |                             | x                           | 203952_at                                                      | ATF-6 alpha                              |
| 225565_at;<br>225572_at                                                                    | CREB1              |                             | x                           | 204162_at                                                      | HEC                                      |
| 225565_at;<br>225572_at                                                                    | CREB1              |                             | x                           | 204170_s_at                                                    | CKS2                                     |
| 225565_at;<br>225572_at                                                                    | CREB1              |                             | x                           | 204184_s_at                                                    | GRK3                                     |
| 225565_at;<br>225572_at                                                                    | CREB1              |                             | x                           | 204254_s_at;<br>204255_s_at;<br>213692_s_at                    | VDR                                      |
| 225565_at;<br>225572_at                                                                    | CREB1              |                             | x                           | 204270_at                                                      | Ski                                      |

| <b>IDs in active data set</b>                                                              | <b>Object name</b> | <b>miR-128 tgts_miRanda</b> | <b>Transcription Factor</b> | <b>IDs of corresponding network object from GeneGo network</b> | <b>Corresponding network object name</b> |
|--------------------------------------------------------------------------------------------|--------------------|-----------------------------|-----------------------------|----------------------------------------------------------------|------------------------------------------|
| 1552703_s_at;<br>206011_at;<br>209970_x_at;<br>211366_x_at;<br>211367_s_at;<br>211368_s_at | Caspase-1          | x                           |                             | 1552701_a_at;<br>1552703_s_at                                  | Pseudo-ICE                               |
| 225565_at;<br>225572_at                                                                    | CREB1              |                             | x                           | 204279_at                                                      | PSMB9                                    |
| 225565_at;<br>225572_at                                                                    | CREB1              |                             | x                           | 204318_s_at                                                    | GTSE1                                    |
| 225565_at;<br>225572_at                                                                    | CREB1              |                             | x                           | 204654_s_at                                                    | AP-2A                                    |
| 225565_at;<br>225572_at                                                                    | CREB1              |                             | x                           | 204732_s_at;<br>210994_x_at;<br>210995_s_at                    | TRIM23                                   |
| 225565_at;<br>225572_at                                                                    | CREB1              |                             | x                           | 204752_x_at;<br>215773_x_at                                    | PARP-2                                   |
| 225565_at;<br>225572_at                                                                    | CREB1              |                             | x                           | 204760_s_at;<br>31637_s_at                                     | TR-alpha                                 |
| 225565_at;<br>225572_at                                                                    | CREB1              |                             | x                           | 204783_at                                                      | MLF1                                     |
| 225565_at;<br>225572_at                                                                    | CREB1              |                             | x                           | 204920_at;<br>217564_s_at                                      | CPSM                                     |
| 225565_at;<br>225572_at                                                                    | CREB1              |                             | x                           | 204926_at;<br>210511_s_at                                      | Activin beta A                           |
| 225565_at;<br>225572_at                                                                    | CREB1              |                             | x                           | 204933_s_at                                                    | Osteoprotegerin                          |
| 225565_at;<br>225572_at                                                                    | CREB1              |                             | x                           | 205067_at;<br>39402_at                                         | IL-1 beta                                |
| 225565_at;<br>225572_at                                                                    | CREB1              |                             | x                           | 205235_s_at                                                    | KRMP1                                    |
| 225565_at;<br>225572_at                                                                    | CREB1              |                             | x                           | 205353_s_at;<br>210825_s_at;<br>211941_s_at                    | RKIP                                     |
| 225565_at;<br>225572_at                                                                    | CREB1              |                             | x                           | 205579_at;<br>205580_s_at                                      | Histamine H1 receptor                    |
| 225565_at;<br>225572_at                                                                    | CREB1              |                             | x                           | 205715_at                                                      | BST1                                     |
| 225565_at;<br>225572_at                                                                    | CREB1              |                             | x                           | 205805_s_at                                                    | ROR1                                     |
| 225565_at;<br>225572_at                                                                    | CREB1              |                             | x                           | 205857_at                                                      | VMAT2                                    |
| 225565_at;<br>225572_at                                                                    | CREB1              |                             | x                           | 205880_at                                                      | PKC-mu                                   |
| 225565_at;                                                                                 | CREB1              |                             | x                           | 206170_at                                                      | Beta-2 adrenergic                        |

| <b>IDs in active data set</b>                                                              | <b>Object name</b> | <b>miR-128 tgts_miRanda</b> | <b>Transcription Factor</b> | <b>IDs of corresponding network object from GeneGo network</b> | <b>Corresponding network object name</b> |
|--------------------------------------------------------------------------------------------|--------------------|-----------------------------|-----------------------------|----------------------------------------------------------------|------------------------------------------|
| 1552703_s_at;<br>206011_at;<br>209970_x_at;<br>211366_x_at;<br>211367_s_at;<br>211368_s_at | Caspase-1          | x                           |                             | 1552701_a_at;<br>1552703_s_at                                  | Pseudo-ICE                               |
| 225572_at                                                                                  |                    |                             |                             |                                                                | receptor                                 |
| 225565_at;<br>225572_at                                                                    | CREB1              |                             | x                           | 206382_s_at;<br>239367_at                                      | BDNF                                     |
| 225565_at;<br>225572_at                                                                    | CREB1              |                             | x                           | 206870_at;<br>223438_s_at;<br>244689_at                        | PPAR-alpha                               |
| 225565_at;<br>225572_at                                                                    | CREB1              |                             | x                           | 206925_at                                                      | SIAT8D                                   |
| 225565_at;<br>225572_at                                                                    | CREB1              |                             | x                           | 207543_s_at                                                    | P4HA1                                    |
| 225565_at;<br>225572_at                                                                    | CREB1              |                             | x                           | 207606_s_at                                                    | ARHGAP12                                 |
| 225565_at;<br>225572_at                                                                    | CREB1              |                             | x                           | 208078_s_at                                                    | SIK                                      |
| 225565_at;<br>225572_at                                                                    | CREB1              |                             | x                           | 208423_s_at;<br>211887_x_at                                    | 08p22/MSR1(CD204)                        |
| 225565_at;<br>225572_at                                                                    | CREB1              |                             | x                           | 208518_s_at                                                    | PER2                                     |
| 225565_at;<br>225572_at                                                                    | CREB1              |                             | x                           | 208591_s_at                                                    | PDE3B                                    |
| 225565_at;<br>225572_at                                                                    | CREB1              |                             | x                           | 208725_at                                                      | eIF2S2                                   |
| 225565_at;<br>225572_at                                                                    | CREB1              |                             | x                           | 208763_s_at                                                    | DSIPI (GILZ)                             |
| 225565_at;<br>225572_at                                                                    | CREB1              |                             | x                           | 208812_x_at;<br>214459_x_at                                    | HLA-Cw3                                  |
| 225565_at;<br>225572_at                                                                    | CREB1              |                             | x                           | 208832_at;<br>208833_s_at                                      | Ataxin-10                                |
| 225565_at;<br>225572_at                                                                    | CREB1              |                             | x                           | 208991_at;<br>208992_s_at;<br>225289_at                        | STAT3                                    |
| 225565_at;<br>225572_at                                                                    | CREB1              |                             | x                           | 208997_s_at                                                    | UCP2                                     |
| 225565_at;<br>225572_at                                                                    | CREB1              |                             | x                           | 209318_x_at                                                    | Zac1                                     |
| 225565_at;<br>225572_at                                                                    | CREB1              |                             | x                           | 209436_at;<br>209437_s_at;<br>213994_s_at                      | F-spondin                                |
| 225565_at;                                                                                 | CREB1              |                             | x                           | 209732_at                                                      | CLECSF2                                  |

| <b>IDs in active data set</b>                                                              | <b>Object name</b> | <b>miR-128 tgts_miRanda</b> | <b>Transcription Factor</b> | <b>IDs of corresponding network object from GeneGo network</b> | <b>Corresponding network object name</b> |
|--------------------------------------------------------------------------------------------|--------------------|-----------------------------|-----------------------------|----------------------------------------------------------------|------------------------------------------|
| 1552703_s_at;<br>206011_at;<br>209970_x_at;<br>211366_x_at;<br>211367_s_at;<br>211368_s_at | Caspase-1          | x                           |                             | 1552701_a_at;<br>1552703_s_at                                  | Pseudo-ICE                               |
| 225572_at                                                                                  |                    |                             |                             |                                                                |                                          |
| 225565_at;<br>225572_at                                                                    | CREB1              |                             | x                           | 209822_s_at                                                    | VLDLR                                    |
| 225565_at;<br>225572_at                                                                    | CREB1              |                             | x                           | 210113_s_at                                                    | CARD7                                    |
| 225565_at;<br>225572_at                                                                    | CREB1              |                             | x                           | 210393_at                                                      | LGR5                                     |
| 225565_at;<br>225572_at                                                                    | CREB1              |                             | x                           | 210449_x_at;<br>211561_x_at                                    | p38alpha (MAPK14)                        |
| 225565_at;<br>225572_at                                                                    | CREB1              |                             | x                           | 210512_s_at;<br>211527_x_at                                    | VEGF-A                                   |
| 225565_at;<br>225572_at                                                                    | CREB1              |                             | x                           | 210538_s_at                                                    | c-IAP2                                   |
| 225565_at;<br>225572_at                                                                    | CREB1              |                             | x                           | 211380_s_at                                                    | Protein kinase G1                        |
| 225565_at;<br>225572_at                                                                    | CREB1              |                             | x                           | 211506_s_at                                                    | IL-8                                     |
| 225565_at;<br>225572_at                                                                    | CREB1              |                             | x                           | 211711_s_at;<br>242622_x_at                                    | PTEN                                     |
| 225565_at;<br>225572_at                                                                    | CREB1              |                             | x                           | 211962_s_at                                                    | TISB                                     |
| 225565_at;<br>225572_at                                                                    | CREB1              |                             | x                           | 211994_at                                                      | WNK1                                     |
| 225565_at;<br>225572_at                                                                    | CREB1              |                             | x                           | 212218_s_at                                                    | FASN                                     |
| 225565_at;<br>225572_at                                                                    | CREB1              |                             | x                           | 212362_at                                                      | Ca-ATPase2                               |
| 225565_at;<br>225572_at                                                                    | CREB1              |                             | x                           | 212372_at;<br>213067_at                                        | MYH10                                    |
| 225565_at;<br>225572_at                                                                    | CREB1              |                             | x                           | 212607_at;<br>212609_s_at;<br>219393_s_at;<br>222880_at        | AKT3                                     |
| 225565_at;<br>225572_at                                                                    | CREB1              |                             | x                           | 212724_at                                                      | RhoE                                     |
| 225565_at;<br>225572_at                                                                    | CREB1              |                             | x                           | 212739_s_at                                                    | NDPK D (mitochondrial)                   |
| 225565_at;<br>225572_at                                                                    | CREB1              |                             | x                           | 213003_s_at                                                    | C/EBPdelta                               |

| <b>IDs in active data set</b>                                                              | <b>Object name</b> | <b>miR-128 tgts_miRanda</b> | <b>Transcription Factor</b> | <b>IDs of corresponding network object from GeneGo network</b> | <b>Corresponding network object name</b> |
|--------------------------------------------------------------------------------------------|--------------------|-----------------------------|-----------------------------|----------------------------------------------------------------|------------------------------------------|
| 1552703_s_at;<br>206011_at;<br>209970_x_at;<br>211366_x_at;<br>211367_s_at;<br>211368_s_at | Caspase-1          | x                           |                             | 1552701_a_at;<br>1552703_s_at                                  | Pseudo-ICE                               |
| 225565_at;<br>225572_at                                                                    | CREB1              |                             | x                           | 213226_at                                                      | Cyclin A2                                |
| 225565_at;<br>225572_at                                                                    | CREB1              |                             | x                           | 213326_at                                                      | VAMP1                                    |
| 225565_at;<br>225572_at                                                                    | CREB1              |                             | x                           | 213348_at                                                      | p57                                      |
| 225565_at;<br>225572_at                                                                    | CREB1              |                             | x                           | 213596_at                                                      | Caspase-4                                |
| 225565_at;<br>225572_at                                                                    | CREB1              |                             | x                           | 214462_at;<br>227542_at                                        | SOCS6                                    |
| 225565_at;<br>225572_at                                                                    | CREB1              |                             | x                           | 214970_s_at;<br>214971_s_at                                    | SIAT1                                    |
| 225565_at;<br>225572_at                                                                    | CREB1              |                             | x                           | 214972_at                                                      | MGEA5<br>(GLCNACase)                     |
| 225565_at;<br>225572_at                                                                    | CREB1              |                             | x                           | 215346_at;<br>222292_at                                        | CD40(TNFRSF5)                            |
| 225565_at;<br>225572_at                                                                    | CREB1              |                             | x                           | 217542_at                                                      | MDM2                                     |
| 225565_at;<br>225572_at                                                                    | CREB1              |                             | x                           | 217871_s_at                                                    | MIF                                      |
| 225565_at;<br>225572_at                                                                    | CREB1              |                             | x                           | 218178_s_at                                                    | CHMP1B                                   |
| 225565_at;<br>225572_at                                                                    | CREB1              |                             | x                           | 218264_at                                                      | BCCIP                                    |
| 225565_at;<br>225572_at                                                                    | CREB1              |                             | x                           | 218457_s_at                                                    | DNMT3A                                   |
| 225565_at;<br>225572_at                                                                    | CREB1              |                             | x                           | 218495_at                                                      | ART-27                                   |
| 225565_at;<br>225572_at                                                                    | CREB1              |                             | x                           | 218832_x_at                                                    | Beta-arrestin1                           |
| 225565_at;<br>225572_at                                                                    | CREB1              |                             | x                           | 219174_at;<br>61732_r_at                                       | IFT74                                    |
| 225565_at;<br>225572_at                                                                    | CREB1              |                             | x                           | 219249_s_at                                                    | FKBP10                                   |
| 225565_at;<br>225572_at                                                                    | CREB1              |                             | x                           | 220038_at                                                      | SGK3                                     |
| 225565_at;<br>225572_at                                                                    | CREB1              |                             | x                           | 220239_at                                                      | KLHL7                                    |
| 225565_at;                                                                                 | CREB1              |                             | x                           | 220266_s_at                                                    | KLF4                                     |



| <b>IDs in active data set</b>                                                              | <b>Object name</b> | <b>miR-128 tgts_miRanda</b> | <b>Transcription Factor</b> | <b>IDs of corresponding network object from GeneGo network</b> | <b>Corresponding network object name</b> |
|--------------------------------------------------------------------------------------------|--------------------|-----------------------------|-----------------------------|----------------------------------------------------------------|------------------------------------------|
| 1552703_s_at;<br>206011_at;<br>209970_x_at;<br>211366_x_at;<br>211367_s_at;<br>211368_s_at | Caspase-1          | x                           |                             | 1552701_a_at;<br>1552703_s_at                                  | Pseudo-ICE                               |
| 225572_at                                                                                  |                    |                             |                             |                                                                |                                          |
| 225565_at;<br>225572_at                                                                    | CREB1              |                             | x                           | 221031_s_at                                                    | APOLD1                                   |
| 225565_at;<br>225572_at                                                                    | CREB1              |                             | x                           | 221085_at                                                      | TL1A(TNFSF15)                            |
| 225565_at;<br>225572_at                                                                    | CREB1              |                             | x                           | 221436_s_at                                                    | Tome-1                                   |
| 225565_at;<br>225572_at                                                                    | CREB1              |                             | x                           | 221478_at                                                      | NIX                                      |
| 225565_at;<br>225572_at                                                                    | CREB1              |                             | x                           | 223254_s_at                                                    | KIAA1333                                 |
| 225565_at;<br>225572_at                                                                    | CREB1              |                             | x                           | 223261_at                                                      | DNA polymerase kappa                     |
| 225565_at;<br>225572_at                                                                    | CREB1              |                             | x                           | 223474_at                                                      | C14orf4                                  |
| 225565_at;<br>225572_at                                                                    | CREB1              |                             | x                           | 223679_at                                                      | Beta-catenin                             |
| 225565_at;<br>225572_at                                                                    | CREB1              |                             | x                           | 224505_s_at                                                    | PLCD4                                    |
| 225565_at;<br>225572_at                                                                    | CREB1              |                             | x                           | 225396_at;<br>237333_at;<br>244872_at                          | RBBP4 (RbAp48)                           |
| 225565_at;<br>225572_at                                                                    | CREB1              |                             | x                           | 226066_at                                                      | MITF                                     |
| 225565_at;<br>225572_at                                                                    | CREB1              |                             | x                           | 226660_at                                                      | p70 S6 kinase1                           |
| 225565_at;<br>225572_at                                                                    | CREB1              |                             | x                           | 227100_at                                                      | B3GALTL                                  |
| 225565_at;<br>225572_at                                                                    | CREB1              |                             | x                           | 228328_at;<br>235727_at                                        | BTBD5                                    |
| 225565_at;<br>225572_at                                                                    | CREB1              |                             | x                           | 228521_s_at                                                    | RAB4B                                    |
| 225565_at;<br>225572_at                                                                    | CREB1              |                             | x                           | 228855_at                                                      | Nudt7                                    |
| 225565_at;<br>225572_at                                                                    | CREB1              |                             | x                           | 229877_at                                                      | Neogenin                                 |
| 225565_at;<br>225572_at                                                                    | CREB1              |                             | x                           | 231801_at                                                      | NF-AT1(NFATC2)                           |
| 225565_at;                                                                                 | CREB1              |                             | x                           | 237485_at                                                      | SFRS3                                    |

| <b>IDs in active data set</b>                                                              | <b>Object name</b> | <b>miR-128 tgts_miRanda</b> | <b>Transcription Factor</b> | <b>IDs of corresponding network object from GeneGo network</b> | <b>Corresponding network object name</b> |
|--------------------------------------------------------------------------------------------|--------------------|-----------------------------|-----------------------------|----------------------------------------------------------------|------------------------------------------|
| 1552703_s_at;<br>206011_at;<br>209970_x_at;<br>211366_x_at;<br>211367_s_at;<br>211368_s_at | Caspase-1          | x                           |                             | 1552701_a_at;<br>1552703_s_at                                  | Pseudo-ICE                               |
| 225572_at                                                                                  |                    |                             |                             |                                                                |                                          |
| 225565_at;<br>225572_at                                                                    | CREB1              |                             | x                           | 241922_at                                                      | LMO4                                     |
| 225565_at;<br>225572_at                                                                    | CREB1              |                             | x                           | 242482_at                                                      | PRKAR1A                                  |
| 225565_at;<br>225572_at                                                                    | CREB1              |                             | x                           | 242930_at                                                      | OSGEP                                    |
| 225565_at;<br>225572_at                                                                    | CREB1              |                             | x                           | 244581_at                                                      | ZNF288                                   |
| 225565_at;<br>225572_at                                                                    | CREB1              |                             | x                           | 36711_at                                                       | MafF                                     |
| 226563_at;<br>235598_at                                                                    | SMAD2              |                             | x                           | 1552656_s_at;<br>227740_at;<br>235003_at                       | KIS                                      |
| 226563_at;<br>235598_at                                                                    | SMAD2              |                             | x                           | 1552737_s_at                                                   | WWP2                                     |
| 226563_at;<br>235598_at                                                                    | SMAD2              |                             | x                           | 1556053_at                                                     | Tpr2                                     |
| 226563_at;<br>235598_at                                                                    | SMAD2              |                             | x                           | 1556499_s_at;<br>202310_s_at                                   | COL1A1                                   |
| 226563_at;<br>235598_at                                                                    | SMAD2              |                             | x                           | 1567223_at;<br>1567224_at                                      | HMGA2                                    |
| 226563_at;<br>235598_at                                                                    | SMAD2              |                             | x                           | 1568713_a_at;<br>1569566_at                                    | TBC1D1                                   |
| 226563_at;<br>235598_at                                                                    | SMAD2              |                             | x                           | 1568765_at;<br>202627_s_at;<br>202628_s_at                     | PAI1                                     |
| 226563_at;<br>235598_at                                                                    | SMAD2              |                             | x                           | 201042_at;<br>211003_x_at;<br>211573_x_at                      | TGM2                                     |
| 226563_at;<br>235598_at                                                                    | SMAD2              |                             | x                           | 201124_at                                                      | ITGB5                                    |
| 226563_at;<br>235598_at                                                                    | SMAD2              |                             | x                           | 201147_s_at;<br>201149_s_at;<br>201150_s_at                    | TIMP3                                    |
| 226563_at;<br>235598_at                                                                    | SMAD2              |                             | x                           | 201458_s_at;<br>209974_s_at                                    | BUB3                                     |
| 226563_at;<br>235598_at                                                                    | SMAD2              |                             | x                           | 201906_s_at                                                    | CTDSPL                                   |

| <b>IDs in active data set</b>                                                              | <b>Object name</b> | <b>miR-128 tgts_miRanda</b> | <b>Transcription Factor</b> | <b>IDs of corresponding network object from GeneGo network</b> | <b>Corresponding network object name</b> |
|--------------------------------------------------------------------------------------------|--------------------|-----------------------------|-----------------------------|----------------------------------------------------------------|------------------------------------------|
| 1552703_s_at;<br>206011_at;<br>209970_x_at;<br>211366_x_at;<br>211367_s_at;<br>211368_s_at | Caspase-1          | x                           |                             | 1552701_a_at;<br>1552703_s_at                                  | Pseudo-ICE                               |
| 226563_at;<br>235598_at                                                                    | SMAD2              |                             | x                           | 202122_s_at                                                    | TIP47                                    |
| 226563_at;<br>235598_at                                                                    | SMAD2              |                             | x                           | 202149_at;<br>202150_s_at                                      | CAS-L                                    |
| 226563_at;<br>235598_at                                                                    | SMAD2              |                             | x                           | 202704_at                                                      | Tob1                                     |
| 226563_at;<br>235598_at                                                                    | SMAD2              |                             | x                           | 203445_s_at                                                    | CTDSP2 (SCP2)                            |
| 226563_at;<br>235598_at                                                                    | SMAD2              |                             | x                           | 204270_at                                                      | Ski                                      |
| 226563_at;<br>235598_at                                                                    | SMAD2              |                             | x                           | 204822_at                                                      | TTK                                      |
| 226563_at;<br>235598_at                                                                    | SMAD2              |                             | x                           | 204825_at                                                      | HPK38                                    |
| 226563_at;<br>235598_at                                                                    | SMAD2              |                             | x                           | 204933_s_at                                                    | Osteoprotegerin                          |
| 226563_at;<br>235598_at                                                                    | SMAD2              |                             | x                           | 205014_at                                                      | HBP17                                    |
| 226563_at;<br>235598_at                                                                    | SMAD2              |                             | x                           | 205209_at;<br>208218_s_at;<br>208223_s_at;<br>213198_at        | ALK-4                                    |
| 226563_at;<br>235598_at                                                                    | SMAD2              |                             | x                           | 207836_s_at                                                    | RBPMS                                    |
| 226563_at;<br>235598_at                                                                    | SMAD2              |                             | x                           | 207980_s_at;<br>209357_at                                      | CITED2                                   |
| 226563_at;<br>235598_at                                                                    | SMAD2              |                             | x                           | 208361_s_at                                                    | POLR3D                                   |
| 226563_at;<br>235598_at                                                                    | SMAD2              |                             | x                           | 208666_s_at;<br>208667_s_at                                    | ST13 (Hip)                               |
| 226563_at;<br>235598_at                                                                    | SMAD2              |                             | x                           | 208920_at                                                      | Sorcini                                  |
| 226563_at;<br>235598_at                                                                    | SMAD2              |                             | x                           | 209377_s_at                                                    | HMGN3                                    |
| 226563_at;<br>235598_at                                                                    | SMAD2              |                             | x                           | 210512_s_at;<br>211527_x_at                                    | VEGF-A                                   |
| 226563_at;<br>235598_at                                                                    | SMAD2              |                             | x                           | 211114_x_at;<br>211115_x_at                                    | SIP1                                     |
| 226563_at;                                                                                 | SMAD2              |                             | x                           | 211711_s_at;                                                   | PTEN                                     |

| <b>IDs in active data set</b>                                                              | <b>Object name</b> | <b>miR-128 tgts_miRanda</b> | <b>Transcription Factor</b> | <b>IDs of corresponding network object from GeneGo network</b> | <b>Corresponding network object name</b> |
|--------------------------------------------------------------------------------------------|--------------------|-----------------------------|-----------------------------|----------------------------------------------------------------|------------------------------------------|
| 1552703_s_at;<br>206011_at;<br>209970_x_at;<br>211366_x_at;<br>211367_s_at;<br>211368_s_at | Caspase-1          | x                           |                             | 1552701_a_at;<br>1552703_s_at                                  | Pseudo-ICE                               |
| 235598_at                                                                                  |                    |                             |                             | 242622_x_at                                                    |                                          |
| 226563_at;<br>235598_at                                                                    | SMAD2              |                             | x                           | 211994_at                                                      | WNK1                                     |
| 226563_at;<br>235598_at                                                                    | SMAD2              |                             | x                           | 212213_x_at;<br>212214_at;<br>214306_at                        | OPA1                                     |
| 226563_at;<br>235598_at                                                                    | SMAD2              |                             | x                           | 213032_at;<br>213033_s_at                                      | NFIB                                     |
| 226563_at;<br>235598_at                                                                    | SMAD2              |                             | x                           | 213746_s_at;<br>214752_x_at                                    | Filamin A                                |
| 226563_at;<br>235598_at                                                                    | SMAD2              |                             | x                           | 215237_at                                                      | Zizimin 1                                |
| 226563_at;<br>235598_at                                                                    | SMAD2              |                             | x                           | 215606_s_at                                                    | ELKS                                     |
| 226563_at;<br>235598_at                                                                    | SMAD2              |                             | x                           | 216004_s_at                                                    | PREP1                                    |
| 226563_at;<br>235598_at                                                                    | SMAD2              |                             | x                           | 217875_s_at;<br>222449_at;<br>222450_at                        | PMEPA1                                   |
| 226563_at;<br>235598_at                                                                    | SMAD2              |                             | x                           | 217941_s_at;<br>222473_s_at                                    | ERBIN                                    |
| 226563_at;<br>235598_at                                                                    | SMAD2              |                             | x                           | 217963_s_at                                                    | NADE(NGFRAP1)                            |
| 226563_at;<br>235598_at                                                                    | SMAD2              |                             | x                           | 218432_at;<br>229955_at                                        | Fbxo3                                    |
| 226563_at;<br>235598_at                                                                    | SMAD2              |                             | x                           | 218932_at                                                      | ZNHIT6                                   |
| 226563_at;<br>235598_at                                                                    | SMAD2              |                             | x                           | 219409_at                                                      | SNIP1                                    |
| 226563_at;<br>235598_at                                                                    | SMAD2              |                             | x                           | 220266_s_at                                                    | KLF4                                     |
| 226563_at;<br>235598_at                                                                    | SMAD2              |                             | x                           | 221744_at;<br>224730_at;<br>224748_at                          | HAN11                                    |
| 226563_at;<br>235598_at                                                                    | SMAD2              |                             | x                           | 222407_s_at                                                    | ZFP106                                   |
| 226563_at;<br>235598_at                                                                    | SMAD2              |                             | x                           | 222489_s_at                                                    | WRNIP1                                   |
| 226563_at;                                                                                 | SMAD2              |                             | x                           | 224710_at                                                      | Rab-34                                   |

| <b>IDs in active data set</b>                                                              | <b>Object name</b> | <b>miR-128 tgts_miRanda</b> | <b>Transcription Factor</b> | <b>IDs of corresponding network object from GeneGo network</b> | <b>Corresponding network object name</b> |
|--------------------------------------------------------------------------------------------|--------------------|-----------------------------|-----------------------------|----------------------------------------------------------------|------------------------------------------|
| 1552703_s_at;<br>206011_at;<br>209970_x_at;<br>211366_x_at;<br>211367_s_at;<br>211368_s_at | Caspase-1          | x                           |                             | 1552701_a_at;<br>1552703_s_at                                  | Pseudo-ICE                               |
| 235598_at                                                                                  |                    |                             |                             |                                                                |                                          |
| 226563_at;<br>235598_at                                                                    | SMAD2              |                             | x                           | 225038_s_at                                                    | SURF6                                    |
| 226563_at;<br>235598_at                                                                    | SMAD2              |                             | x                           | 225066_at                                                      | PPP2R2D                                  |
| 226563_at;<br>235598_at                                                                    | SMAD2              |                             | x                           | 226975_at                                                      | U11/U12-65K                              |
| 226563_at;<br>235598_at                                                                    | SMAD2              |                             | x                           | 227606_s_at;<br>227607_at                                      | AMSH-2                                   |
| 226563_at;<br>235598_at                                                                    | SMAD2              |                             | x                           | 228942_s_at                                                    | AIP1 (DAB2ip)                            |
| 226563_at;<br>235598_at                                                                    | SMAD2              |                             | x                           | 230775_s_at                                                    | SPG20                                    |
| 226563_at;<br>235598_at                                                                    | SMAD2              |                             | x                           | 235154_at                                                      | TAF3                                     |
| 226563_at;<br>235598_at                                                                    | SMAD2              |                             | x                           | 241922_at                                                      | LMO4                                     |
| 226563_at;<br>235598_at                                                                    | SMAD2              |                             | x                           | 242482_at                                                      | PRKAR1A                                  |
| 226660_at                                                                                  | p70 S6 kinase1     | x                           |                             | 200726_at                                                      | PP1-cat gamma                            |
| 226660_at                                                                                  | p70 S6 kinase1     | x                           |                             | 201693_s_at;<br>201694_s_at;<br>227404_s_at                    | EGR1                                     |
| 226660_at                                                                                  | p70 S6 kinase1     | x                           |                             | 202313_at                                                      | PPP2R2A                                  |
| 226660_at                                                                                  | p70 S6 kinase1     | x                           |                             | 206686_at;<br>226452_at                                        | PKD1                                     |
| 226660_at                                                                                  | p70 S6 kinase1     | x                           |                             | 206877_at;<br>228846_at                                        | MAD                                      |
| 226660_at                                                                                  | p70 S6 kinase1     | x                           |                             | 208725_at                                                      | eIF2S2                                   |
| 226660_at                                                                                  | p70 S6 kinase1     | x                           |                             | 210449_x_at;<br>211561_x_at                                    | p38alpha (MAPK14)                        |
| 226660_at                                                                                  | p70 S6 kinase1     | x                           |                             | 210477_x_at;<br>226048_at                                      | JNK1(MAPK8)                              |
| 226660_at                                                                                  | p70 S6 kinase1     | x                           |                             | 212073_at                                                      | Casein kinase II, alpha chain (CSNK2A1)  |

| <b>IDs in active data set</b>                                                              | <b>Object name</b> | <b>miR-128 tgts_miRanda</b> | <b>Transcription Factor</b> | <b>IDs of corresponding network object from GeneGo network</b> | <b>Corresponding network object name</b> |
|--------------------------------------------------------------------------------------------|--------------------|-----------------------------|-----------------------------|----------------------------------------------------------------|------------------------------------------|
| 1552703_s_at;<br>206011_at;<br>209970_x_at;<br>211366_x_at;<br>211367_s_at;<br>211368_s_at | Caspase-1          | x                           |                             | 1552701_a_at;<br>1552703_s_at                                  | Pseudo-ICE                               |
| 226660_at                                                                                  | p70 S6 kinase1     | x                           |                             | 212100_s_at;<br>215357_s_at                                    | PDIP46                                   |
| 226660_at                                                                                  | p70 S6 kinase1     | x                           |                             | 212594_at                                                      | PDCD4                                    |
| 226660_at                                                                                  | p70 S6 kinase1     | x                           |                             | 217542_at                                                      | MDM2                                     |
| 226660_at                                                                                  | p70 S6 kinase1     | x                           |                             | 223158_s_at                                                    | NEK6                                     |
| 226660_at                                                                                  | p70 S6 kinase1     | x                           |                             | 231966_at                                                      | Neurabin-1                               |
| 226660_at                                                                                  | p70 S6 kinase1     | x                           |                             | 242550_at                                                      | eIF3S9                                   |
| 227703_s_at                                                                                | SYTL4              | x                           |                             | 202260_s_at                                                    | MUNC18                                   |
| 227703_s_at                                                                                | SYTL4              | x                           |                             | 204609_at                                                      | DIPA                                     |
| 227703_s_at                                                                                | SYTL4              | x                           |                             | 207018_s_at                                                    | Rab-27B                                  |
| 227703_s_at                                                                                | SYTL4              | x                           |                             | 207346_at                                                      | Epimorphin                               |
| 227703_s_at                                                                                | SYTL4              | x                           |                             | 208819_at                                                      | Rab-8                                    |
| 227703_s_at                                                                                | SYTL4              | x                           |                             | 209515_s_at                                                    | Rab-27A                                  |
| 227703_s_at                                                                                | SYTL4              | x                           |                             | 216985_s_at                                                    | Syntaxin 3                               |
| 235412_at                                                                                  | BETA-PIX           |                             |                             | 1554168_a_at;<br>223082_at;<br>235692_at                       | CIN85                                    |
| 235412_at                                                                                  | BETA-PIX           |                             |                             | 202154_x_at;<br>213476_x_at                                    | Tubulin beta 3                           |
| 235412_at                                                                                  | BETA-PIX           |                             |                             | 202395_at                                                      | NSF                                      |
| 235412_at                                                                                  | BETA-PIX           |                             |                             | 203856_at                                                      | VRK1                                     |
| 235412_at                                                                                  | BETA-PIX           |                             |                             | 208877_at;<br>208878_s_at                                      | PAK2                                     |
| 235412_at                                                                                  | BETA-PIX           |                             |                             | 209682_at                                                      | CBL-B                                    |
| 235412_at                                                                                  | BETA-PIX           |                             |                             | 211208_s_at                                                    | CASK                                     |
| 235412_at                                                                                  | BETA-PIX           |                             |                             | 212372_at;<br>213067_at                                        | MYH10                                    |
| 235412_at                                                                                  | BETA-PIX           |                             |                             | 212556_at                                                      | SCRIB                                    |
| 235412_at                                                                                  | BETA-PIX           |                             |                             | 213307_at;<br>243681_at                                        | SHANK2                                   |
| 235412_at                                                                                  | BETA-PIX           |                             |                             | 214607_at                                                      | PAK3                                     |
| 235412_at                                                                                  | BETA-PIX           |                             |                             | 218284_at                                                      | SMAD3                                    |
| 235412_at                                                                                  | BETA-PIX           |                             |                             | 220563_s_at                                                    | SHANK1                                   |
| 235412_at                                                                                  | BETA-PIX           |                             |                             | 221725_at;                                                     | WASF2                                    |

| <b>IDs in active data set</b>                                                              | <b>Object name</b> | <b>miR-128 tgts_miRanda</b> | <b>Transcription Factor</b> | <b>IDs of corresponding network object from GeneGo network</b> | <b>Corresponding network object name</b> |
|--------------------------------------------------------------------------------------------|--------------------|-----------------------------|-----------------------------|----------------------------------------------------------------|------------------------------------------|
| 1552703_s_at;<br>206011_at;<br>209970_x_at;<br>211366_x_at;<br>211367_s_at;<br>211368_s_at | Caspase-1          | x                           |                             | 1552701_a_at;<br>1552703_s_at                                  | Pseudo-ICE                               |
|                                                                                            |                    |                             |                             | 224562_at;<br>224563_at                                        |                                          |
| 235412_at                                                                                  | BETA-PIX           |                             |                             | 224681_at                                                      | G-protein alpha-12                       |
| 235412_at                                                                                  | BETA-PIX           |                             |                             | 224861_at                                                      | G-protein alpha-q                        |
| 235412_at                                                                                  | BETA-PIX           |                             |                             | 226563_at;<br>235598_at                                        | SMAD2                                    |
| 235412_at                                                                                  | BETA-PIX           |                             |                             | 237856_at                                                      | Rap1GDS1                                 |
| 235473_at                                                                                  | MED6               |                             | x                           | 1553993_s_at                                                   | MED25                                    |
| 235473_at                                                                                  | MED6               |                             | x                           | 204254_s_at;<br>204255_s_at;<br>213692_s_at                    | VDR                                      |
| 235473_at                                                                                  | MED6               |                             | x                           | 204535_s_at                                                    | NRSF                                     |
| 235473_at                                                                                  | MED6               |                             | x                           | 204760_s_at;<br>31637_s_at                                     | TR-alpha                                 |
| 235473_at                                                                                  | MED6               |                             | x                           | 209363_s_at                                                    | SRB7                                     |
| 235473_at                                                                                  | MED6               |                             | x                           | 209938_at;<br>210537_s_at                                      | ADA2                                     |
| 235473_at                                                                                  | MED6               |                             | x                           | 212897_at                                                      | CDK11                                    |
| 235473_at                                                                                  | MED6               |                             | x                           | 215167_at                                                      | TRAP170                                  |
| 235473_at                                                                                  | MED6               |                             | x                           | 222635_s_at                                                    | EG1                                      |
| 235473_at                                                                                  | MED6               |                             | x                           | 224871_at                                                      | TPRG1L                                   |
| 235473_at                                                                                  | MED6               |                             | x                           | 226563_at;<br>235598_at                                        | SMAD2                                    |
| 235473_at                                                                                  | MED6               |                             | x                           | 242707_at                                                      | DRIP130                                  |
| 242141_at                                                                                  | HDAC2              |                             | x                           | 1552758_at;<br>1552760_at;<br>234393_at                        | HDAC9                                    |
| 242141_at                                                                                  | HDAC2              |                             | x                           | 1553764_a_at;<br>225806_at                                     | Ajuba                                    |
| 242141_at                                                                                  | HDAC2              |                             | x                           | 1556499_s_at;<br>202310_s_at                                   | COL1A1                                   |
| 242141_at                                                                                  | HDAC2              |                             | x                           | 1565483_at                                                     | EGFR                                     |
| 242141_at                                                                                  | HDAC2              |                             | x                           | 201320_at                                                      | BAF170                                   |
| 242141_at                                                                                  | HDAC2              |                             | x                           | 201458_s_at;<br>209974_s_at                                    | BUB3                                     |
| 242141_at                                                                                  | HDAC2              |                             | x                           | 201693_s_at;<br>201694_s_at;<br>227404_s_at                    | EGR1                                     |
| 242141_at                                                                                  | HDAC2              |                             | x                           | 202240_at                                                      | PLK1                                     |

| <b>IDs in active data set</b>                                                              | <b>Object name</b> | <b>miR-128 tgts_miRanda</b> | <b>Transcription Factor</b> | <b>IDs of corresponding network object from GeneGo network</b> | <b>Corresponding network object name</b>      |
|--------------------------------------------------------------------------------------------|--------------------|-----------------------------|-----------------------------|----------------------------------------------------------------|-----------------------------------------------|
| 1552703_s_at;<br>206011_at;<br>209970_x_at;<br>211366_x_at;<br>211367_s_at;<br>211368_s_at | Caspase-1          | x                           |                             | 1552701_a_at;<br>1552703_s_at                                  | Pseudo-ICE                                    |
| 242141_at                                                                                  | HDAC2              |                             | x                           | 202599_s_at;<br>202600_s_at                                    | RIP140                                        |
| 242141_at                                                                                  | HDAC2              |                             | x                           | 202728_s_at                                                    | LTBP1                                         |
| 242141_at                                                                                  | HDAC2              |                             | x                           | 203298_s_at                                                    | JARID2                                        |
| 242141_at                                                                                  | HDAC2              |                             | x                           | 203408_s_at                                                    | SATB1                                         |
| 242141_at                                                                                  | HDAC2              |                             | x                           | 203520_s_at                                                    | TZF                                           |
| 242141_at                                                                                  | HDAC2              |                             | x                           | 204363_at                                                      | Tissue factor                                 |
| 242141_at                                                                                  | HDAC2              |                             | x                           | 204535_s_at                                                    | NRSF                                          |
| 242141_at                                                                                  | HDAC2              |                             | x                           | 204760_s_at;<br>31637_s_at                                     | TR-alpha                                      |
| 242141_at                                                                                  | HDAC2              |                             | x                           | 205014_at                                                      | HBP17                                         |
| 242141_at                                                                                  | HDAC2              |                             | x                           | 206382_s_at;<br>239367_at                                      | BDNF                                          |
| 242141_at                                                                                  | HDAC2              |                             | x                           | 206877_at;<br>228846_at                                        | MAD                                           |
| 242141_at                                                                                  | HDAC2              |                             | x                           | 207836_s_at                                                    | RBPM5                                         |
| 242141_at                                                                                  | HDAC2              |                             | x                           | 208151_x_at;<br>208719_s_at;<br>213998_s_at                    | DDX17                                         |
| 242141_at                                                                                  | HDAC2              |                             | x                           | 208991_at;<br>208992_s_at;<br>225289_at                        | STAT3                                         |
| 242141_at                                                                                  | HDAC2              |                             | x                           | 209332_s_at                                                    | Max                                           |
| 242141_at                                                                                  | HDAC2              |                             | x                           | 209715_at;<br>212126_at                                        | HP1 alpha                                     |
| 242141_at                                                                                  | HDAC2              |                             | x                           | 210282_at                                                      | ZNF198                                        |
| 242141_at                                                                                  | HDAC2              |                             | x                           | 210684_s_at                                                    | PSD-95                                        |
| 242141_at                                                                                  | HDAC2              |                             | x                           | 210719_s_at                                                    | HMG20B                                        |
| 242141_at                                                                                  | HDAC2              |                             | x                           | 212057_at                                                      | KIAA0182                                      |
| 242141_at                                                                                  | HDAC2              |                             | x                           | 212073_at                                                      | Casein kinase II,<br>alpha chain<br>(CSNK2A1) |
| 242141_at                                                                                  | HDAC2              |                             | x                           | 212118_at                                                      | RFP                                           |
| 242141_at                                                                                  | HDAC2              |                             | x                           | 212167_s_at                                                    | BAF47                                         |
| 242141_at                                                                                  | HDAC2              |                             | x                           | 212287_at                                                      | SUZ12                                         |
| 242141_at                                                                                  | HDAC2              |                             | x                           | 213348_at                                                      | p57                                           |
| 242141_at                                                                                  | HDAC2              |                             | x                           | 217192_s_at;<br>228964_at                                      | BLIMP1 (PRDI-<br>BF1)                         |
| 242141_at                                                                                  | HDAC2              |                             | x                           | 218457_s_at                                                    | DNMT3A                                        |



| <b>IDs in active data set</b>                                                              | <b>Object name</b> | <b>miR-128 tgts_miRanda</b> | <b>Transcription Factor</b> | <b>IDs of corresponding network object from GeneGo network</b> | <b>Corresponding network object name</b> |
|--------------------------------------------------------------------------------------------|--------------------|-----------------------------|-----------------------------|----------------------------------------------------------------|------------------------------------------|
| 1552703_s_at;<br>206011_at;<br>209970_x_at;<br>211366_x_at;<br>211367_s_at;<br>211368_s_at | Caspase-1          | x                           |                             | 1552701_a_at;<br>1552703_s_at                                  | Pseudo-ICE                               |
| 242141_at                                                                                  | HDAC2              |                             | x                           | 218619_s_at                                                    | Suv39H1                                  |
| 242141_at                                                                                  | HDAC2              |                             | x                           | 219497_s_at;<br>219498_s_at;<br>222891_s_at                    | CTIP1                                    |
| 242141_at                                                                                  | HDAC2              |                             | x                           | 219682_s_at;<br>225544_at                                      | TBX3                                     |
| 242141_at                                                                                  | HDAC2              |                             | x                           | 220085_at;<br>223556_at;<br>227349_at                          | HELLS (Lsh)                              |
| 242141_at                                                                                  | HDAC2              |                             | x                           | 220266_s_at                                                    | KLF4                                     |
| 242141_at                                                                                  | HDAC2              |                             | x                           | 221676_s_at                                                    | CORO1C                                   |
| 242141_at                                                                                  | HDAC2              |                             | x                           | 222895_s_at                                                    | CTIP2                                    |
| 242141_at                                                                                  | HDAC2              |                             | x                           | 223111_x_at                                                    | ARID4B                                   |
| 242141_at                                                                                  | HDAC2              |                             | x                           | 223392_s_at                                                    | ZNF537                                   |
| 242141_at                                                                                  | HDAC2              |                             | x                           | 223679_at                                                      | Beta-catenin                             |
| 242141_at                                                                                  | HDAC2              |                             | x                           | 224974_at                                                      | SDS3                                     |
| 242141_at                                                                                  | HDAC2              |                             | x                           | 225396_at;<br>237333_at;<br>244872_at                          | RBBP4 (RbAp48)                           |
| 242141_at                                                                                  | HDAC2              |                             | x                           | 225565_at;<br>225572_at                                        | CREB1                                    |
| 242141_at                                                                                  | HDAC2              |                             | x                           | 226554_at                                                      | FBI-1 (Pokemon)                          |
| 242141_at                                                                                  | HDAC2              |                             | x                           | 226563_at;<br>235598_at                                        | SMAD2                                    |
| 242141_at                                                                                  | HDAC2              |                             | x                           | 226648_at                                                      | FIH-1                                    |
| 242141_at                                                                                  | HDAC2              |                             | x                           | 227660_at                                                      | ATR/TEM8                                 |
| 242141_at                                                                                  | HDAC2              |                             | x                           | 231292_at                                                      | EID3                                     |
| 242141_at                                                                                  | HDAC2              |                             | x                           | 235588_at                                                      | ESCO2                                    |
| 242141_at                                                                                  | HDAC2              |                             | x                           | 241813_at                                                      | MBD1                                     |
| 242141_at                                                                                  | HDAC2              |                             | x                           | 241922_at                                                      | LMO4                                     |

**Supplementary Table 9. Differentially expressed genes that are targeted by NF- $\kappa$ B or IL-1**

**Beta.** Differentially expressed genes following miR-7 transfection in HEY cells that are directly regulated by NF- $\kappa$ B, by IL-1 beta, or by both are listed. IL-1 beta (IL1B) is a transcriptional target of NF- $\kappa$ B and both are significantly down-regulated following miR-7 transfection. The genes that are only targeted by IL-1 beta may be differentially expressed because RELA/NF- $\kappa$ B is a target of miR-7 and in turn regulates IL-1 beta.

| NF- $\kappa$ B only |         | IL1- $\beta$ only | Common targets |
|---------------------|---------|-------------------|----------------|
| ACO2                | KCTD12  | CASP1             | ASS1           |
| ADAM19              | LIFR    | DPP4              | BID            |
| ASPH                | LITAF   | IGFBP3            | BMP2           |
| ATXN3               | MAT2A   | IL1RAP            | CXCL1          |
| BACE1               | MATR3   | IL7               | CXCL2          |
| CALM1               | NQO1    | IRS1              | DDIT3          |
| CALM3               | OGT     | LAMC1             | FN1            |
| CBS                 | PAX6    | ME1               | HBEGF          |
| CCND2               | PCK2    | MMP14             | ICAM1          |
| CCRL2               | PDPN    | NFKBIZ            | IL8            |
| CDK6                | PHLDA1  | NR1H3             | MIR21          |
| CDKN1B              | PMEPA1  | NRP1              | NUPR1          |
| CSNK1A1             | PSME3   | NRP2              | PTX3           |
| DDIT4               | RRM2    | PAPPA             | RUNX2          |
| DDX21               | S100A6  | PRLR              | SAA1           |
| DLG1                | SH2B3   | SERPINH1          | SAA2           |
| DTNA                | SLC11A2 | SLC38A2           | SERPINE2       |
| EHD1                | SLC44A1 | SLC7A2            | SOD2           |
| EIF4A1              | ST6GAL1 | SOCS7             | SPP1           |
| ERAP1               | ST8SIA1 | THBD              | TGFA           |
| GAS5                | TFRC    | THBS1             | TGFB2          |
| GFPT2               | TGM2    | TIMP3             | TGFBR2         |
| GLO1                | TNIP1   |                   | VEGFA          |
| GREM1               | TXNIP   |                   | VEGFC          |
| HSPA9               | VIM     |                   | XIAP           |
| IL1B                | ZBED4   |                   |                |
| IL7R                |         |                   |                |

**Supplementary Table 10. Direct downstream targets of Caveolin-1 and SMAD2.** Caveolin-1

and SMAD2 are both identified as ‘hub genes’ among the genes differentially expressed after miR-128 transfection. CAV1 is a predicted target of miR-128 but SMAD2 is not. By targeting CAV1, miR-128 indirectly regulates SMAD2 and triggers the differential expression of genes regulated by SMAD2 as well. Differentially expressed genes that are direct targets of either Caveolin-1 or SMAD2 are listed. The relative fold change of these genes following miR-128 transfection into HEY cells are also provided.

| <b>Caveolin-1 and its direct targets</b> |                    | <b>SMAD2 and its direct targets</b> |                    |
|------------------------------------------|--------------------|-------------------------------------|--------------------|
| <b>Gene Symbol</b>                       | <b>Fold change</b> | <b>Gene Symbol</b>                  | <b>Fold change</b> |
| CAV1                                     | -2.44              | BUB3                                | -1.65              |
| CD40                                     | 2.25               | COL1A1                              | 2.40               |
| CFL1                                     | -1.70              | DAB2IP                              | 2.06               |
| ENO2                                     | 1.78               | DCAF7                               | -1.61              |
| EPHB1                                    | -2.66              | DOCK9                               | 1.57               |
| FLNA                                     | -2.09              | ERC1                                | 1.80               |
| FOLR1                                    | -1.86              | FGFBP1                              | -1.55              |
| GNAQ                                     | 1.53               | HMGA2                               | -1.64              |
| ITGA2                                    | 2.00               | HMG3                                | -1.49              |
| ITPR1                                    | 2.09               | ITGB5                               | -1.60              |
| MAPK14                                   | -1.83              | KLF4                                | -1.42              |
| NEDD8                                    | -1.57              | NEDD9                               | 1.97               |
| NGFRAP1                                  | -1.79              | NFIB                                | -1.54              |
| NT5E                                     | -1.73              | OPA1                                | -2.03              |
| PDE3B                                    | -1.59              | PKNOX1                              | 1.58               |
| PTEN                                     | -2.74              | PLIN3                               | -1.54              |
| PTGS1                                    | 4.12               | PRKAR1A                             | 2.84               |
| SEPT7                                    | -1.98              | SERPINE1                            | 2.23               |
| SLC9A7                                   | 1.71               | SMAD2                               | -1.59              |
| SMAD2                                    | -1.59              | ST13                                | -1.95              |
| SPRY4                                    | 1.71               | SURF6                               | 1.55               |
| STMN1                                    | -1.72              | TAF3                                | 1.53               |
| TNFRSF10A                                | 1.70               | TIMP3                               | -2.99              |
|                                          |                    | TNFRSF11B                           | 1.47               |
|                                          |                    | TOB1                                | -1.69              |
|                                          |                    | VEGFA                               | 2.15               |
|                                          |                    | WRNIP1                              | 1.48               |
|                                          |                    | WWP2                                | 1.73               |
|                                          |                    | ZFP106                              | 2.10               |
|                                          |                    | ZNHIT6                              | -1.63              |

**Supplementary Table 11. Significantly enriched GeneGo pathway maps among the differentially expressed genes following miR-7 transfection into HEY cells.** GeneGo pathway maps significantly enriched (FDR <0.05) among the differentially expressed genes after miR-7 transfection into HEY cells are listed. Also shown are the hypergeometric distribution p-values of enrichments from GeneGo and the ratio of number of genes actually present in the dataset to the number of genes in the Affymetrix array that are in each pathway. Pathways are sorted based on p-values and the most frequent pathways are highlighted using colors with pathways within a particular process marked with the same shade.

| <b>Maps</b>                                                                                         | <b>p-value</b> | <b>ratio</b> |
|-----------------------------------------------------------------------------------------------------|----------------|--------------|
| Cell adhesion_Chemokines and adhesion                                                               | 1.31E-07       | 15/100       |
| Cell cycle_Regulation of G1/S transition (part 1)                                                   | 8.68E-07       | 9/38         |
| Cell adhesion_Ephrin signaling                                                                      | 3.96E-06       | 9/45         |
| Development_EGFR signaling pathway                                                                  | 1.02E-05       | 10/63        |
| Development_ERBB-family signaling                                                                   | 1.13E-05       | 8/39         |
| Development_WNT signaling pathway. Part 1. Degradation of beta-catenin in the absence WNT signaling | 1.42E-05       | 6/20         |
| Development_VEGF-family signaling                                                                   | 1.68E-05       | 8/41         |
| Cytoskeleton remodeling_Cytoskeleton remodeling                                                     | 3.13E-05       | 12/102       |
| Neurophysiological process_Receptor-mediated axon growth repulsion                                  | 3.43E-05       | 8/45         |
| Proteolysis_Putative ubiquitin pathway                                                              | 3.44E-05       | 6/23         |
| Development_TGF-beta-dependent induction of EMT via RhoA, PI3K and ILK.                             | 4.05E-05       | 8/46         |
| Cell adhesion_Plasmin signaling                                                                     | 4.85E-05       | 7/35         |
| Development_TGF-beta-dependent induction of EMT via SMADs                                           | 4.85E-05       | 7/35         |
| Transport_RAB5A regulation pathway                                                                  | 5.75E-05       | 6/25         |
| Cytoskeleton remodeling_TGF, WNT and cytoskeletal remodeling                                        | 7.29E-05       | 12/111       |
| Cell cycle_Regulation of G1/S transition (part 2)                                                   | 7.30E-05       | 6/26         |
| Apoptosis and survival_HTR1A signaling                                                              | 7.54E-05       | 8/50         |
| Development_Regulation of epithelial-to-mesenchymal transition (EMT)                                | 7.67E-05       | 9/64         |
| Translation_Regulation of EIF2 activity                                                             | 1.01E-04       | 7/39         |
| Cell adhesion_ECM remodeling                                                                        | 1.01E-04       | 8/52         |
| Translation_Regulation of EIF4F activity                                                            | 1.16E-04       | 8/53         |
| Translation_Non-genomic (rapid) action of Androgen Receptor                                         | 1.19E-04       | 7/40         |
| Apoptosis and survival_NO synthesis and signaling                                                   | 1.51E-04       | 8/55         |

| <b>Maps</b>                                                                                | <b>p-value</b> | <b>ratio</b> |
|--------------------------------------------------------------------------------------------|----------------|--------------|
| Immune response_Neurotensin-induced activation of IL-8 in colonocytes                      | 1.64E-04       | 7/42         |
| Apoptosis and survival_TNFR1 signaling pathway                                             | 1.91E-04       | 7/43         |
| Role of alpha-6/beta-4 integrins in carcinoma progression                                  | 2.57E-04       | 7/45         |
| Development_EPO-induced MAPK pathway                                                       | 2.57E-04       | 7/45         |
| dCTP/dUTP metabolism                                                                       | 2.66E-04       | 9/75         |
| Development_GDNF family signaling                                                          | 2.95E-04       | 7/46         |
| Signal transduction_PTEN pathway                                                           | 2.95E-04       | 7/46         |
| Cytoskeleton remodeling_CDC42 in cellular processes                                        | 3.24E-04       | 5/22         |
| Development_TGF-beta-dependent induction of EMT via MAPK                                   | 3.39E-04       | 7/47         |
| Development_Gastrin in cell growth and proliferation                                       | 3.54E-04       | 8/62         |
| Proteolysis_Role of Parkin in the Ubiquitin-Proteasomal Pathway                            | 4.99E-04       | 5/24         |
| Development_Dopamine D2 receptor transactivation of EGFR                                   | 4.99E-04       | 5/24         |
| Development_TGF-beta receptor signaling                                                    | 5.00E-04       | 7/50         |
| Transport_RAB3 regulation pathway                                                          | 5.20E-04       | 4/14         |
| Development_IGF-1 receptor signaling                                                       | 5.66E-04       | 7/51         |
| Membrane-bound ESR1: interaction with G-proteins signaling                                 | 5.66E-04       | 7/51         |
| Immune response_Role of integrins in NK cells cytotoxicity                                 | 6.57E-04       | 6/38         |
| Development_WNT signaling pathway. Part 2                                                  | 7.18E-04       | 7/53         |
| Neurophysiological process_Dopamine D2 receptor transactivation of PDGFR in CNS            | 7.36E-04       | 5/26         |
| Immune response_Gastrin in inflammatory response                                           | 7.37E-04       | 8/69         |
| Transcription_Receptor-mediated HIF regulation                                             | 7.58E-04       | 6/39         |
| Regulation of degradation of deltaF508 CFTR in CF                                          | 8.83E-04       | 5/27         |
| PGE2 pathways in cancer                                                                    | 9.00E-04       | 7/55         |
| Regulation of lipid metabolism_Stimulation of Arachidonic acid production by ACM receptors | 9.80E-04       | 8/72         |
| Development_Mu-type opioid receptor regulation of proliferation                            | 1.05E-03       | 5/28         |
| Cytoskeleton remodeling_FAK signaling                                                      | 1.12E-03       | 7/57         |
| Apoptosis and survival_BAD phosphorylation                                                 | 1.14E-03       | 6/42         |
| Development_Role of IL-8 in angiogenesis                                                   | 1.24E-03       | 7/58         |
| Development_VEGF signaling and activation                                                  | 1.29E-03       | 6/43         |
| Regulation of degradation of wt-CFTR                                                       | 1.45E-03       | 4/18         |
| Immune response_IL-4 - antiapoptotic action                                                | 1.45E-03       | 5/30         |
| dATP/dITP metabolism                                                                       | 1.64E-03       | 9/96         |
| Cytoskeleton remodeling_Fibronectin-binding integrins in cell motility                     | 1.69E-03       | 5/31         |
| Cytoskeleton remodeling_Reverse signaling by ephrin B                                      | 1.69E-03       | 5/31         |
| Development_Alpha-2 adrenergic receptor activation of ERK                                  | 1.84E-03       | 7/62         |
| Development_Endothelin-1/EDNRA transactivation of EGFR                                     | 1.84E-03       | 6/46         |
| Development_PDGF signaling via STATs and NF-kB                                             | 1.96E-03       | 5/32         |

| <b>Maps</b>                                                                           | <b>p-value</b> | <b>ratio</b> |
|---------------------------------------------------------------------------------------|----------------|--------------|
| Development_EGFR signaling via small GTPases                                          | 1.96E-03       | 5/32         |
| Transport_Macropinocytosis regulation by growth factors                               | 2.02E-03       | 7/63         |
| Development_FGF2-dependent induction of EMT                                           | 2.20E-03       | 4/20         |
| Immune response_CD40 signaling                                                        | 2.22E-03       | 7/64         |
| Development_Angiotensin activation of ERK                                             | 2.26E-03       | 5/33         |
| Development_A3 receptor signaling                                                     | 2.56E-03       | 6/49         |
| Development_PEDF signaling                                                            | 2.56E-03       | 6/49         |
| G-protein signaling_G-Protein beta/gamma signaling cascades                           | 2.59E-03       | 5/34         |
| Cell cycle_Cell cycle (generic schema)                                                | 2.66E-03       | 4/21         |
| Development_EPO-induced Jak-STAT pathway                                              | 2.95E-03       | 5/35         |
| Development_EGFR signaling via PIP3                                                   | 3.76E-03       | 4/23         |
| Development_Beta-adrenergic receptors transactivation of EGFR                         | 3.78E-03       | 5/37         |
| Development_FGFR signaling pathway                                                    | 3.82E-03       | 6/53         |
| Cell cycle_Influence of Ras and Rho proteins on G1/S Transition                       | 3.82E-03       | 6/53         |
| Regulation of lipid metabolism_Regulation of lipid metabolism via LXR, NF-Y and SREBP | 4.25E-03       | 5/38         |
| Regulation of lipid metabolism_Insulin regulation of glycogen metabolism              | 4.61E-03       | 6/55         |
| Cell adhesion_PLAU signaling                                                          | 4.77E-03       | 5/39         |
| G-protein signaling_K-RAS regulation pathway                                          | 5.13E-03       | 4/25         |
| Cytoskeleton remodeling_Neurofilaments                                                | 5.13E-03       | 4/25         |
| Development_Prolactin receptor signaling                                              | 5.99E-03       | 6/58         |
| Regulation of CFTR activity (norm and CF)                                             | 5.99E-03       | 6/58         |
| Translation_Insulin regulation of translation                                         | 6.57E-03       | 5/42         |
| Immune response_Signaling pathway mediated by IL-6 and IL-1                           | 6.81E-03       | 4/27         |
| Immune response_IL-17 signaling pathways                                              | 7.07E-03       | 6/60         |
| Development_ACM2 and ACM4 activation of ERK                                           | 7.27E-03       | 5/43         |
| Signal transduction_AKT signaling                                                     | 7.27E-03       | 5/43         |
| Immune response_IL-4 signaling pathway                                                | 8.01E-03       | 5/44         |
| Development_Flt3 signaling                                                            | 8.01E-03       | 5/44         |
| Development_Activation of Erk by ACM1, ACM3 and ACM5                                  | 8.01E-03       | 5/44         |
| Development_Ligand-independent activation of ESR1 and ESR2                            | 8.01E-03       | 5/44         |
| Transcription_CREB pathway                                                            | 8.01E-03       | 5/44         |

**Supplementary Table 12. Significantly enriched GeneGo pathway maps among the differentially expressed genes following miR-128 transfection into HEY cells.** GeneGo pathway maps significantly enriched (FDR <0.05) among the differentially expressed genes after miR-128 transfection into HEY cells are listed. Also shown are the hypergeometric distribution p-values of enrichments from GeneGo and the ratio of number of genes actually present in the dataset to the number of genes in the Affymetrix array that are in each pathway. Pathways are sorted based on p-values and the most frequent pathways are highlighted using colors with those within a particular process marked with the same shade.

| <b>Maps</b>                                                           | <b>p-value</b> | <b>Ratio</b> |
|-----------------------------------------------------------------------|----------------|--------------|
| Cell cycle_ The metaphase checkpoint                                  | 1.01E-11       | 18/36        |
| Cytoskeleton remodeling_ TGF, WNT and cytoskeletal remodeling         | 1.29E-09       | 29/111       |
| Cell cycle_ Role of Nek in cell cycle regulation                      | 1.77E-09       | 15/32        |
| Transport_ Clathrin-coated vesicle cycle                              | 4.15E-09       | 22/71        |
| Cell cycle_ Initiation of mitosis                                     | 4.37E-09       | 13/25        |
| Immune response_ Histamine H1 receptor signaling in immune response   | 1.78E-07       | 16/48        |
| Cell cycle_ Role of APC in cell cycle regulation                      | 1.79E-07       | 13/32        |
| Cell cycle_ Spindle assembly and chromosome separation                | 2.75E-07       | 13/33        |
| Cytoskeleton remodeling_ Cytoskeleton remodeling                      | 2.98E-07       | 24/102       |
| Proteolysis_ Role of Parkin in the Ubiquitin-Proteasomal Pathway      | 3.68E-07       | 11/24        |
| Cytoskeleton remodeling_ Neurofilaments                               | 6.14E-07       | 11/25        |
| Cell cycle_ Chromosome condensation in prometaphase                   | 8.18E-07       | 10/21        |
| Immune response_ Gastrin in inflammatory response                     | 1.85E-06       | 18/69        |
| Neurophysiological process_ Receptor-mediated axon growth repulsion   | 2.69E-06       | 14/45        |
| Translation_ Non-genomic (rapid) action of Androgen Receptor          | 3.55E-06       | 13/40        |
| Development_ PIP3 signaling in cardiac myocytes                       | 4.80E-06       | 14/47        |
| Cytoskeleton remodeling_ Role of Activin A in cytoskeleton remodeling | 5.34E-06       | 9/20         |
| Apoptosis and survival_ Apoptotic Activin A signaling                 | 5.76E-06       | 10/25        |
| Apoptosis and survival_ BAD phosphorylation                           | 6.54E-06       | 13/42        |
| Immune response_ Fc epsilon RI pathway                                | 7.40E-06       | 15/55        |
| Cytoskeleton remodeling_ Reverse signaling by ephrin B                | 7.70E-06       | 11/31        |
| Development_ Gastrin in cell growth and proliferation                 | 8.04E-06       | 16/62        |
| Immune response_ Function of MEF2 in T lymphocytes                    | 1.07E-05       | 14/50        |
| Development_ Activation of Erk by ACM1, ACM3 and ACM5                 | 1.16E-05       | 13/44        |

| <b>Maps</b>                                                                                               | <b>p-value</b> | <b>Ratio</b> |
|-----------------------------------------------------------------------------------------------------------|----------------|--------------|
| Immune response_CD40 signaling                                                                            | 1.25E-05       | 16/64        |
| Cell cycle_Role of 14-3-3 proteins in cell cycle regulation                                               | 1.38E-05       | 9/22         |
| Cell adhesion_Histamine H1 receptor signaling in the interruption of cell barrier integrity               | 1.52E-05       | 13/45        |
| Signal transduction_Calcium signaling                                                                     | 1.52E-05       | 13/45        |
| Development_TGF-beta-dependent induction of EMT via RhoA, PI3K and ILK.                                   | 1.98E-05       | 13/46        |
| Proteolysis_Putative ubiquitin pathway                                                                    | 2.12E-05       | 9/23         |
| Cell cycle_Influence of Ras and Rho proteins on G1/S Transition                                           | 2.22E-05       | 14/53        |
| Cell cycle_Role of SCF complex in cell cycle regulation                                                   | 2.69E-05       | 10/29        |
| Development_Role of HDAC and calcium/calmodulin-dependent kinase (CaMK) in control of skeletal myogenesis | 2.79E-05       | 14/54        |
| Development_Angiopoietin - Tie2 signaling                                                                 | 2.88E-05       | 11/35        |
| Neurophysiological process_EphB receptors in dendritic spine morphogenesis and synaptogenesis             | 2.88E-05       | 11/35        |
| Development_Slit-Robo signaling                                                                           | 3.76E-05       | 10/30        |
| Cell adhesion_Chemokines and adhesion                                                                     | 3.83E-05       | 20/100       |
| Signal transduction_AKT signaling                                                                         | 4.73E-05       | 12/43        |
| Development_A2A receptor signaling                                                                        | 4.73E-05       | 12/43        |
| Development_Regulation of epithelial-to-mesenchymal transition (EMT)                                      | 5.28E-05       | 15/64        |
| Cytoskeleton remodeling_FAK signaling                                                                     | 5.37E-05       | 14/57        |
| Cell adhesion_Cadherin-mediated cell adhesion                                                             | 6.61E-05       | 9/26         |
| Development_Role of IL-8 in angiogenesis                                                                  | 6.61E-05       | 14/58        |
| Role of alpha-6/beta-4 integrins in carcinoma progression                                                 | 7.72E-05       | 12/45        |
| Development_Endothelin-1/EDNRA transactivation of EGFR                                                    | 9.75E-05       | 12/46        |
| Cytoskeleton remodeling_CDC42 in cellular processes                                                       | 1.14E-04       | 8/22         |
| Development_Leptin signaling via PI3K-dependent pathway                                                   | 1.22E-04       | 12/47        |
| Immune response_CD28 signaling                                                                            | 1.23E-04       | 13/54        |
| Cell adhesion_Alpha-4 integrins in cell migration and adhesion                                            | 1.25E-04       | 10/34        |
| G-protein signaling_G-Protein alpha-q signaling cascades                                                  | 1.25E-04       | 10/34        |
| Development_Role of CDK5 in neuronal development                                                          | 1.25E-04       | 10/34        |
| Immune response_IL-15 signaling via JAK-STAT cascade                                                      | 1.63E-04       | 8/23         |
| Cytoskeleton remodeling_Regulation of actin cytoskeleton by Rho GTPases                                   | 1.63E-04       | 8/23         |
| Delta508-CFTR traffic / ER-to-Golgi in CF                                                                 | 1.82E-04       | 6/13         |
| Normal wtCFTR traffic / ER-to-Golgi                                                                       | 1.82E-04       | 6/13         |
| Immune response_Neurotensin-induced activation of IL-8 in colonocytes                                     | 1.83E-04       | 11/42        |
| Immune response_TREM1 signaling pathway                                                                   | 1.83E-04       | 13/56        |
| Immune response_IL-2 activation and signaling pathway                                                     | 1.88E-04       | 12/49        |
| Signal transduction_IP3 signaling                                                                         | 1.88E-04       | 12/49        |



| <b>Maps</b>                                                                           | <b>p-value</b> | <b>Ratio</b> |
|---------------------------------------------------------------------------------------|----------------|--------------|
| Immune response_IL-15 signaling                                                       | 2.05E-04       | 14/64        |
| Immune response_IL-7 signaling in B lymphocytes                                       | 2.29E-04       | 11/43        |
| Apoptosis and survival_Anti-apoptotic action of Gastrin                               | 2.29E-04       | 11/43        |
| Development_A2B receptor: action via G-protein alpha s                                | 2.31E-04       | 12/50        |
| Immune response_CCR5 signaling in macrophages and T lymphocytes                       | 2.66E-04       | 13/58        |
| wtCFTR and delta508 traffic / Clathrin coated vesicles formation (norm and CF)        | 2.82E-04       | 7/19         |
| Development_IGF-1 receptor signaling                                                  | 2.82E-04       | 12/51        |
| Mucin expression in CF via TLRs, EGFR signaling pathways                              | 2.82E-04       | 12/51        |
| Development_Flt3 signaling                                                            | 2.86E-04       | 11/44        |
| Transcription_CREB pathway                                                            | 2.86E-04       | 11/44        |
| Cytoskeleton remodeling_Fibronectin-binding integrins in cell motility                | 3.04E-04       | 9/31         |
| Development_Leptin signaling via JAK/STAT and MAPK cascades                           | 3.15E-04       | 8/25         |
| Signal transduction_Activation of PKC via G-Protein coupled receptor                  | 3.42E-04       | 12/52        |
| Immune response_Human NKG2D signaling                                                 | 3.43E-04       | 10/38        |
| Regulation of lipid metabolism_Regulation of lipid metabolism via LXR, NF-Y and SREBP | 3.43E-04       | 10/38        |
| Cell cycle_Regulation of G1/S transition (part 1)                                     | 3.43E-04       | 10/38        |
| Development_Angiotensin signaling via STATs                                           | 3.96E-04       | 9/32         |
| Development_FGFR signaling pathway                                                    | 4.13E-04       | 12/53        |
| Development_A1 receptor signaling                                                     | 4.13E-04       | 12/53        |
| Development_Cross-talk between VEGF and Angiopoietin 1 signaling pathways             | 4.26E-04       | 8/26         |
| Immune response_IL-10 signaling pathway                                               | 4.26E-04       | 8/26         |
| Development_GDNF family signaling                                                     | 4.33E-04       | 11/46        |
| Immune response_MIF - the neuroendocrine-macrophage connector                         | 4.33E-04       | 11/46        |
| Signal transduction_PTEN pathway                                                      | 4.33E-04       | 11/46        |
| Immune response_IFN gamma signaling pathway                                           | 4.96E-04       | 12/54        |
| Immune response_BCR pathway                                                           | 4.96E-04       | 12/54        |
| Signal transduction_Activin A signaling regulation                                    | 5.08E-04       | 9/33         |
| Neurophysiological process_Circadian rhythm                                           | 5.28E-04       | 11/47        |
| Cytoskeleton remodeling_Role of PKA in cytoskeleton reorganization                    | 5.37E-04       | 10/40        |
| Reproduction_Progesterone-mediated oocyte maturation                                  | 5.37E-04       | 10/40        |
| Apoptosis and survival_Anti-apoptotic TNFs/NF-kB/IAP pathway                          | 5.66E-04       | 8/27         |
| PGE2 pathways in cancer                                                               | 5.92E-04       | 12/55        |
| Apoptosis and survival_NO synthesis and signaling                                     | 5.92E-04       | 12/55        |

| <b>Maps</b>                                                                               | <b>p-value</b> | <b>Ratio</b> |
|-------------------------------------------------------------------------------------------|----------------|--------------|
| Development_EGFR signaling pathway                                                        | 6.26E-04       | 13/63        |
| Transport_Macropinocytosis regulation by growth factors                                   | 6.26E-04       | 13/63        |
| Cell adhesion_Integrin-mediated cell adhesion and migration                               | 6.40E-04       | 11/48        |
| Development_NOTCH1-mediated pathway for NF-KB activity modulation                         | 6.46E-04       | 9/34         |
| Transport_ACM3 in salivary glands                                                         | 6.64E-04       | 10/41        |
| Muscle contraction_ACM regulation of smooth muscle contraction                            | 7.03E-04       | 12/56        |
| Development_A3 receptor signaling                                                         | 7.71E-04       | 11/49        |
| Cell cycle_Sister chromatid cohesion                                                      | 7.83E-04       | 7/22         |
| Transcription_Role of heterochromatin protein 1 (HP1) family in transcriptional silencing | 7.83E-04       | 7/22         |
| Development_EPO-induced Jak-STAT pathway                                                  | 8.14E-04       | 9/35         |
| Immune response_PIP3 signaling in B lymphocytes                                           | 8.14E-04       | 10/42        |
| Development_TGF-beta receptor signaling                                                   | 9.23E-04       | 11/50        |
| Regulation of CFTR activity (norm and CF)                                                 | 9.79E-04       | 12/58        |
| Development_VEGF signaling and activation                                                 | 9.92E-04       | 10/43        |
| Cytoskeleton remodeling_Keratin filaments                                                 | 1.01E-03       | 9/36         |
| Development_EGFR signaling via PIP3                                                       | 1.05E-03       | 7/23         |
| Muscle contraction_GPCRs in the regulation of smooth muscle tone                          | 1.07E-03       | 15/83        |
| Immune response_NFAT in immune response                                                   | 1.10E-03       | 11/51        |
| Transport_Macropinocytosis                                                                | 1.15E-03       | 5/12         |
| Immune response_IL-1 signaling pathway                                                    | 1.20E-03       | 10/44        |
| Muscle contraction_EDG5-mediated smooth muscle contraction                                | 1.22E-03       | 8/30         |
| Cell adhesion_Gap junctions                                                               | 1.22E-03       | 8/30         |
| G-protein signaling_G-Protein alpha-12 signaling pathway                                  | 1.25E-03       | 9/37         |
| Cell adhesion_Role of tetraspanins in the integrin-mediated cell adhesion                 | 1.25E-03       | 9/37         |
| Development_Hedgehog and PTH signaling pathways in bone and cartilage development         | 1.25E-03       | 9/37         |
| Development_Glucocorticoid receptor signaling                                             | 1.39E-03       | 7/24         |
| Immune response_Inhibitory action of Lipoxins on pro-inflammatory TNF-alpha signaling     | 1.44E-03       | 10/45        |
| Development_VEGF signaling via VEGFR2 - generic cascades                                  | 1.44E-03       | 10/45        |
| Immune response_CCR3 signaling in eosinophils                                             | 1.46E-03       | 14/77        |
| Development_WNT signaling pathway. Part 2                                                 | 1.54E-03       | 11/53        |
| Development_Gastrin in differentiation of the gastric mucosa                              | 1.54E-03       | 9/38         |
| Development_Angiotensin activation of Akt                                                 | 1.72E-03       | 10/46        |
| Immune response_ICOS pathway in T-helper cell                                             | 1.72E-03       | 10/46        |
| Development_WNT5A signaling                                                               | 1.72E-03       | 10/46        |
| Transcription_Transcription regulation of aminoacid metabolism                            | 1.81E-03       | 7/25         |

| <b>Maps</b>                                                                                              | <b>p-value</b> | <b>Ratio</b> |
|----------------------------------------------------------------------------------------------------------|----------------|--------------|
| Translation_Regulation of EIF2 activity                                                                  | 1.87E-03       | 9/39         |
| G-protein signaling_Regulation of p38 and JNK signaling mediated by G-proteins                           | 1.87E-03       | 9/39         |
| Development_TGF-beta-dependent induction of EMT via MAPK                                                 | 2.04E-03       | 10/47        |
| Neurophysiological process_NMDA-dependent postsynaptic long-term potentiation in CA1 hippocampal neurons | 2.14E-03       | 14/80        |
| Development_Role of Activin A in cell differentiation and proliferation                                  | 2.25E-03       | 9/40         |
| Immune response_MIF in innate immunity response                                                          | 2.25E-03       | 9/40         |
| Regulation of lipid metabolism_Stimulation of Arachidonic acid production by ACM receptors               | 2.28E-03       | 13/72        |
| DNA damage_ATM / ATR regulation of G2 / M checkpoint                                                     | 2.32E-03       | 7/26         |
| Development_EDG5 and EDG3 in cell proliferation and differentiation                                      | 2.32E-03       | 7/26         |
| Normal and pathological TGF-beta-mediated regulation of cell proliferation                               | 2.38E-03       | 8/33         |
| Development_Keratinocyte differentiation                                                                 | 2.45E-03       | 11/56        |
| Development_WNT signaling pathway. Part 1. Degradation of beta-catenin in the absence WNT signaling      | 2.62E-03       | 6/20         |
| Development_FGF2-dependent induction of EMT                                                              | 2.62E-03       | 6/20         |
| Neurophysiological process_Netrin-1 in regulation of axon guidance                                       | 2.70E-03       | 9/41         |
| Development_Melanocyte development and pigmentation                                                      | 2.83E-03       | 10/49        |
| Development_PEDF signaling                                                                               | 2.83E-03       | 10/49        |
| Signal transduction_Erk Interactions: Inhibition of Erk                                                  | 2.91E-03       | 8/34         |
| G-protein signaling_RhoA regulation pathway                                                              | 2.91E-03       | 8/34         |
| Neurophysiological process_GABA-A receptor life cycle                                                    | 2.94E-03       | 7/27         |
| Regulation of degradation of deltaF508 CFTR in CF                                                        | 2.94E-03       | 7/27         |
| Development_Prolactin receptor signaling                                                                 | 3.27E-03       | 11/58        |
| Development_EDNRB signaling                                                                              | 3.31E-03       | 10/50        |
| Apoptosis and survival_HTR1A signaling                                                                   | 3.31E-03       | 10/50        |
| Immune response_Histamine signaling in dendritic cells                                                   | 3.31E-03       | 10/50        |
| Development_GM-CSF signaling                                                                             | 3.31E-03       | 10/50        |
| Blood coagulation_GPIIb-IX-V-dependent platelet activation                                               | 3.32E-03       | 13/75        |
| Cell cycle_Cell cycle (generic schema)                                                                   | 3.45E-03       | 6/21         |
| Atherosclerosis_Role of ZNF202 in regulation of expression of genes involved in Atherosclerosis          | 3.45E-03       | 6/21         |
| Apoptosis and survival_Anti-apoptotic action of membrane-bound ESR1                                      | 3.53E-03       | 8/35         |
| Development_Regulation of telomere length and cellular immortalization                                   | 3.53E-03       | 8/35         |
| Development_Growth hormone signaling via STATs and PLC/IP3                                               | 3.53E-03       | 8/35         |

| <b>Maps</b>                                                                                       | <b>p-value</b> | <b>Ratio</b> |
|---------------------------------------------------------------------------------------------------|----------------|--------------|
| Development_EDG3 signaling pathway                                                                | 3.80E-03       | 9/43         |
| Immune response_HTR2A-induced activation of cPLA2                                                 | 3.80E-03       | 9/43         |
| Signal transduction_PKA signaling                                                                 | 3.85E-03       | 10/51        |
| Membrane-bound ESR1: interaction with G-proteins signaling                                        | 3.85E-03       | 10/51        |
| Chemotaxis_Inhibitory action of lipoxins on IL-8- and Leukotriene B4-induced neutrophil migration | 3.85E-03       | 10/51        |
| Some pathways of EMT in cancer cells                                                              | 3.85E-03       | 10/51        |
| Immune response_IL-17 signaling pathways                                                          | 4.29E-03       | 11/60        |
| Apoptosis and survival_nAChR in apoptosis inhibition and cell cycle progression                   | 4.53E-03       | 7/29         |
| NGF activation of NF-kB                                                                           | 4.53E-03       | 7/29         |
| Immune response_CD137 signaling in immune cell                                                    | 4.53E-03       | 7/29         |
| Cytoskeleton remodeling_ACM3 and ACM4 in keratinocyte migration                                   | 5.08E-03       | 8/37         |
| Development_Delta-type opioid receptor mediated cardioprotection                                  | 5.08E-03       | 8/37         |
| Development_Beta-adrenergic receptors transactivation of EGFR                                     | 5.08E-03       | 8/37         |
| Development_Endothelin-1/EDNRA signaling                                                          | 5.14E-03       | 10/53        |
| Neurophysiological process_Glutamate regulation of Dopamine D1A receptor signaling                | 5.23E-03       | 9/45         |
| Transcription_Androgen Receptor nuclear signaling                                                 | 5.23E-03       | 9/45         |
| Cell adhesion_Ephrin signaling                                                                    | 5.23E-03       | 9/45         |
| Development_Thrombopoietin-regulated cell processes                                               | 5.23E-03       | 9/45         |
| Cytoskeleton remodeling_RalA regulation pathway                                                   | 5.54E-03       | 7/30         |
| Immune response_Role of DAP12 receptors in NK cells                                               | 5.90E-03       | 10/54        |
| Immune response_Role of integrins in NK cells cytotoxicity                                        | 6.02E-03       | 8/38         |
| Immune response_IL-7 signaling in T lymphocytes                                                   | 6.02E-03       | 8/38         |
| Development_Mu-type opioid receptor signaling                                                     | 6.02E-03       | 8/38         |
| Chemotaxis_Lipoxin inhibitory action on fMLP-induced neutrophil chemotaxis                        | 6.09E-03       | 9/46         |
| Neurophysiological process_ACM regulation of nerve impulse                                        | 6.09E-03       | 9/46         |
| Reproduction_GnRH signaling                                                                       | 6.49E-03       | 12/72        |
| Transcription_Transcription factor Tubby signaling pathways                                       | 6.59E-03       | 5/17         |
| Development_HGF signaling pathway                                                                 | 7.04E-03       | 9/47         |
| Development_Dopamine D2 receptor transactivation of EGFR                                          | 7.06E-03       | 6/24         |
| Apoptosis and survival_NO signaling in survival                                                   | 7.06E-03       | 6/24         |
| HIV-1 signaling via CCR5 in macrophages and T lymphocytes                                         | 7.09E-03       | 8/39         |
| Development_ERBB-family signaling                                                                 | 7.09E-03       | 8/39         |
| Cell adhesion_PLAU signaling                                                                      | 7.09E-03       | 8/39         |
| Muscle contraction_Regulation of eNOS activity in endothelial cells                               | 7.11E-03       | 11/64        |
| Cell adhesion_Integrin inside-out signaling                                                       | 7.67E-03       | 10/56        |

| <b>Maps</b>                                                                                | <b>p-value</b> | <b>Ratio</b> |
|--------------------------------------------------------------------------------------------|----------------|--------------|
| Development_PDGF signaling via STATs and NF-kB                                             | 8.05E-03       | 7/32         |
| Development_Neurotrophin family signaling                                                  | 8.30E-03       | 8/40         |
| Inhibitory action of Lipoxins on neutrophil migration                                      | 8.70E-03       | 10/57        |
| Immune response_IL-23 signaling pathway                                                    | 8.71E-03       | 6/25         |
| Development_Angiotensin signaling via beta-Arrestin                                        | 8.71E-03       | 6/25         |
| Cytoskeleton remodeling_Integrin outside-in signaling                                      | 9.30E-03       | 9/49         |
| Immune response_Bacterial infections in normal airways                                     | 9.30E-03       | 9/49         |
| Development_Angiotensin activation of ERK                                                  | 9.57E-03       | 7/33         |
| Development_Activation of astroglial cells proliferation by ACM3                           | 9.57E-03       | 7/33         |
| Development_Signaling of Beta-adrenergic receptors via Beta-arrestins                      | 1.06E-02       | 6/26         |
| Cytoskeleton remodeling_Alpha-1A adrenergic receptor-dependent inhibition of PI3K          | 1.09E-02       | 5/19         |
| G-protein signaling_G-Protein beta/gamma signaling cascades                                | 1.13E-02       | 7/34         |
| wtCFTR and deltaF508 traffic / Membrane expression (norm and CF)                           | 1.13E-02       | 7/34         |
| Muscle contraction_Oxytocin signaling in uterus and mammary gland                          | 1.24E-02       | 10/60        |
| Immune response_CD16 signaling in NK cells                                                 | 1.24E-02       | 11/69        |
| G-protein signaling_G-Protein alpha-i signaling cascades                                   | 1.28E-02       | 6/27         |
| Development_ACM2 and ACM4 activation of ERK                                                | 1.29E-02       | 8/43         |
| Development_Angiotensin signaling via PYK2                                                 | 1.29E-02       | 8/43         |
| Cell adhesion_Plasmin signaling                                                            | 1.32E-02       | 7/35         |
| Development_TGF-beta-dependent induction of EMT via SMADs                                  | 1.32E-02       | 7/35         |
| G-protein signaling_EDG5 signaling                                                         | 1.32E-02       | 7/35         |
| ENaC regulation in airways (normal and CF)                                                 | 1.37E-02       | 9/52         |
| Immune response_T cell receptor signaling pathway                                          | 1.37E-02       | 9/52         |
| G-protein signaling_Proinsulin C-peptide signaling                                         | 1.37E-02       | 9/52         |
| Cytoskeleton remodeling_ESR1 action on cytoskeleton remodeling and cell migration          | 1.37E-02       | 5/20         |
| Translation_IL-2 regulation of translation                                                 | 1.37E-02       | 5/20         |
| Regulation of lipid metabolism_Alpha-1 adrenergic receptors signaling via arachidonic acid | 1.38E-02       | 11/70        |
| Development_Ligand-independent activation of ESR1 and ESR2                                 | 1.47E-02       | 8/44         |
| Immune response_IL-5 signalling                                                            | 1.47E-02       | 8/44         |
| Blood coagulation_GPCRs in platelet aggregation                                            | 1.53E-02       | 11/71        |
| Development_Delta-type opioid receptor signaling via G-protein alpha-14                    | 1.53E-02       | 6/28         |
| Translation_Regulation of EIF4F activity                                                   | 1.54E-02       | 9/53         |
| Immune response_IL-9 signaling pathway                                                     | 1.54E-02       | 7/36         |
| Cell adhesion_Tight junctions                                                              | 1.54E-02       | 7/36         |
| G-protein signaling_Regulation of RAC1 activity                                            | 1.54E-02       | 7/36         |

| <b>Maps</b>                                                     | <b>p-value</b> | <b>Ratio</b> |
|-----------------------------------------------------------------|----------------|--------------|
| G-protein signaling_RAC1 in cellular process                    | 1.54E-02       | 7/36         |
| Development_Alpha-2 adrenergic receptor activation of ERK       | 1.55E-02       | 10/62        |
| Cell cycle_Nucleocytoplasmic transport of CDK/Cyclins           | 1.67E-02       | 4/14         |
| Immune response_Delta-type opioid receptor signaling in T-cells | 1.81E-02       | 6/29         |

**Supplementary Table 13. Significantly enriched GeneGo pathway maps among the down-regulated genes following miR-7 transfection into HEY cells.** Significantly enriched (FDR <0.05) GeneGo pathway maps among the down-regulated genes after miR-7 transfection into HEY cells are listed. Also shown are the hypergeometric distribution p-values of enrichments from GeneGo and the ratio of number of genes actually present in the dataset to the number of genes in the Affymetrix array that are in each pathway. Pathways are sorted based on enrichment p-values.

| <b>Maps</b>                                                                                         | <b>p-value</b> | <b>Ratio</b> |
|-----------------------------------------------------------------------------------------------------|----------------|--------------|
| Cell adhesion_Chemokines and adhesion                                                               | 6.99E-08       | 14/100       |
| Cell adhesion_Ephrin signaling                                                                      | 7.47E-07       | 9/45         |
| Development_EGFR signaling pathway                                                                  | 1.70E-06       | 10/63        |
| Development_ERBB-family signaling                                                                   | 2.57E-06       | 8/39         |
| Development_VEGF-family signaling                                                                   | 3.83E-06       | 8/41         |
| Cytoskeleton remodeling_Cytoskeleton remodeling                                                     | 4.10E-06       | 12/102       |
| Development_WNT signaling pathway. Part 1. Degradation of beta-catenin in the absence WNT signaling | 4.47E-06       | 6/20         |
| Neurophysiological process_Receptor-mediated axon growth repulsion                                  | 7.97E-06       | 8/45         |
| Cytoskeleton remodeling_TGF, WNT and cytoskeletal remodeling                                        | 9.97E-06       | 12/111       |
| Apoptosis and survival_HTR1A signaling                                                              | 1.80E-05       | 8/50         |
| Transport_RAB5A regulation pathway                                                                  | 1.85E-05       | 6/25         |
| Cell cycle_Regulation of G1/S transition (part 1)                                                   | 2.35E-05       | 7/38         |
| Cell adhesion_ECM remodeling                                                                        | 2.42E-05       | 8/52         |
| Translation_Regulation of EIF4F activity                                                            | 2.79E-05       | 8/53         |
| Translation_Regulation of EIF2 activity                                                             | 2.81E-05       | 7/39         |
| Translation_Non-genomic (rapid) action of Androgen Receptor                                         | 3.33E-05       | 7/40         |
| Apoptosis and survival_NO synthesis and signaling                                                   | 3.69E-05       | 8/55         |

| <b>Maps</b>                                                                                | <b>p-value</b> | <b>Ratio</b> |
|--------------------------------------------------------------------------------------------|----------------|--------------|
| Immune response_Neurotensin-induced activation of IL-8 in colonocytes                      | 4.64E-05       | 7/42         |
| Apoptosis and survival_TNFR1 signaling pathway                                             | 5.43E-05       | 7/43         |
| Role of alpha-6/beta-4 integrins in carcinoma progression                                  | 7.35E-05       | 7/45         |
| Development_GDNF family signaling                                                          | 8.50E-05       | 7/46         |
| Signal transduction_PTEN pathway                                                           | 8.50E-05       | 7/46         |
| Development_Gastrin in cell growth and proliferation                                       | 8.90E-05       | 8/62         |
| Development_Regulation of epithelial-to-mesenchymal transition (EMT)                       | 1.12E-04       | 8/64         |
| Cell adhesion_Plasmin signaling                                                            | 1.40E-04       | 6/35         |
| Development_TGF-beta receptor signaling                                                    | 1.47E-04       | 7/50         |
| Proteolysis_Putative ubiquitin pathway                                                     | 1.59E-04       | 5/23         |
| Membrane-bound ESR1: interaction with G-proteins signaling                                 | 1.67E-04       | 7/51         |
| Immune response_Gastrin in inflammatory response                                           | 1.91E-04       | 8/69         |
| Development_Dopamine D2 receptor transactivation of EGFR                                   | 1.97E-04       | 5/24         |
| Development_WNT signaling pathway. Part 2                                                  | 2.13E-04       | 7/53         |
| Immune response_Role of integrins in NK cells cytotoxicity                                 | 2.24E-04       | 6/38         |
| Regulation of lipid metabolism_Stimulation of Arachidonic acid production by ACM receptors | 2.58E-04       | 8/72         |
| PGE2 pathways in cancer                                                                    | 2.70E-04       | 7/55         |
| Neurophysiological process_Dopamine D2 receptor transactivation of PDGFR in CNS            | 2.93E-04       | 5/26         |
| Cell cycle_Regulation of G1/S transition (part 2)                                          | 2.93E-04       | 5/26         |
| Cytoskeleton remodeling_FAK signaling                                                      | 3.38E-04       | 7/57         |
| Regulation of degradation of deltaF508 CFTR in CF                                          | 3.53E-04       | 5/27         |
| Development_Role of IL-8 in angiogenesis                                                   | 3.77E-04       | 7/58         |
| Apoptosis and survival_BAD phosphorylation                                                 | 3.94E-04       | 6/42         |
| Development_Mu-type opioid receptor regulation of proliferation                            | 4.22E-04       | 5/28         |
| Development_VEGF signaling and activation                                                  | 4.50E-04       | 6/43         |
| Development_Alpha-2 adrenergic receptor activation of ERK                                  | 5.70E-04       | 7/62         |
| Development_EPO-induced MAPK pathway                                                       | 5.78E-04       | 6/45         |
| Immune response_IL-4 - antiapoptotic action                                                | 5.89E-04       | 5/30         |
| Transport_Macropinocytosis regulation by growth factors                                    | 6.28E-04       | 7/63         |
| Development_TGF-beta-dependent induction of EMT via RhoA, PI3K and ILK.                    | 6.52E-04       | 6/46         |
| Development_Endothelin-1/EDNRA transactivation of EGFR                                     | 6.52E-04       | 6/46         |
| Regulation of degradation of wt-CFTR                                                       | 6.87E-04       | 4/18         |
| Cytoskeleton remodeling_Fibronectin-binding integrins in cell motility                     | 6.89E-04       | 5/31         |
| Cytoskeleton remodeling_Reverse signaling by ephrin B                                      | 6.89E-04       | 5/31         |
| Immune response_CD40 signaling                                                             | 6.92E-04       | 7/64         |

| <b>Maps</b>                                                                           | <b>p-value</b> | <b>Ratio</b> |
|---------------------------------------------------------------------------------------|----------------|--------------|
| Development_EGFR signaling via small GTPases                                          | 8.01E-04       | 5/32         |
| Development_PDGF signaling via STATs and NF-kB                                        | 8.01E-04       | 5/32         |
| Development_PEDF signaling                                                            | 9.18E-04       | 6/49         |
| Development_Angiotensin activation of ERK                                             | 9.27E-04       | 5/33         |
| Development_FGF2-dependent induction of EMT                                           | 1.05E-03       | 4/20         |
| G-protein signaling_G-Protein beta/gamma signaling cascades                           | 1.07E-03       | 5/34         |
| Development_IGF-1 receptor signaling                                                  | 1.14E-03       | 6/51         |
| Development_EPO-induced Jak-STAT pathway                                              | 1.22E-03       | 5/35         |
| Development_FGFR signaling pathway                                                    | 1.40E-03       | 6/53         |
| Cell cycle_Influence of Ras and Rho proteins on G1/S Transition                       | 1.40E-03       | 6/53         |
| Cytoskeleton remodeling_CDC42 in cellular processes                                   | 1.53E-03       | 4/22         |
| Development_Beta-adrenergic receptors transactivation of EGFR                         | 1.58E-03       | 5/37         |
| Regulation of lipid metabolism_Insulin regulation of glycogen metabolism              | 1.70E-03       | 6/55         |
| Regulation of lipid metabolism_Regulation of lipid metabolism via LXR, NF-Y and SREBP | 1.78E-03       | 5/38         |
| Development_EGFR signaling via PIP3                                                   | 1.81E-03       | 4/23         |
| Transcription_Receptor-mediated HIF regulation                                        | 2.01E-03       | 5/39         |
| Cell adhesion_PLAU signaling                                                          | 2.01E-03       | 5/39         |
| Proteolysis_Role of Parkin in the Ubiquitin-Proteasomal Pathway                       | 2.14E-03       | 4/24         |
| Regulation of CFTR activity (norm and CF)                                             | 2.23E-03       | 6/58         |
| Development_Prolactin receptor signaling                                              | 2.23E-03       | 6/58         |
| Cytoskeleton remodeling_Neurofilaments                                                | 2.50E-03       | 4/25         |
| Immune response_IL-17 signaling pathways                                              | 2.66E-03       | 6/60         |
| Translation_Insulin regulation of translation                                         | 2.80E-03       | 5/42         |
| Development_ACM2 and ACM4 activation of ERK                                           | 3.11E-03       | 5/43         |
| Signal transduction_AKT signaling                                                     | 3.11E-03       | 5/43         |
| Immune response_Signaling pathway mediated by IL-6 and IL-1                           | 3.34E-03       | 4/27         |
| Immune response_IL-4 signaling pathway                                                | 3.45E-03       | 5/44         |
| Transcription_CREB pathway                                                            | 3.45E-03       | 5/44         |
| Development_Flt3 signaling                                                            | 3.45E-03       | 5/44         |
| Development_Activation of Erk by ACM1, ACM3 and ACM5                                  | 3.45E-03       | 5/44         |
| Development_Ligand-independent activation of ESR1 and ESR2                            | 3.45E-03       | 5/44         |
| Development_Thrombopoietin-regulated cell processes                                   | 3.80E-03       | 5/45         |
| Development_PIP3 signaling in cardiac myocytes                                        | 4.60E-03       | 5/47         |
| Development_TGF-beta-dependent induction of EMT via MAPK                              | 4.60E-03       | 5/47         |
| Immune response_Histamine H1 receptor signaling in immune response                    | 5.04E-03       | 5/48         |
| Muscle contraction_Relaxin signaling pathway                                          | 5.04E-03       | 5/48         |
| Development_A3 receptor signaling                                                     | 5.51E-03       | 5/49         |
| Signal transduction_IP3 signaling                                                     | 5.51E-03       | 5/49         |



| <b>Maps</b>                                                                                       | <b>p-value</b> | <b>Ratio</b> |
|---------------------------------------------------------------------------------------------------|----------------|--------------|
| Cytoskeleton remodeling_Integrin outside-in signaling                                             | 5.51E-03       | 5/49         |
| Apoptosis and survival_Role of IAP-proteins in apoptosis                                          | 5.57E-03       | 4/31         |
| Immune response_Histamine signaling in dendritic cells                                            | 6.00E-03       | 5/50         |
| Immune response_IL-13 signaling via PI3K-ERK                                                      | 6.00E-03       | 5/50         |
| Chemotaxis_Inhibitory action of lipoxins on IL-8- and Leukotriene B4-induced neutrophil migration | 6.53E-03       | 5/51         |
| Mucin expression in CF via TLRs, EGFR signaling pathways                                          | 6.53E-03       | 5/51         |
| Apoptosis and survival_Caspase cascade                                                            | 6.99E-03       | 4/33         |
| G-protein signaling_Proinsulin C-peptide signaling                                                | 7.09E-03       | 5/52         |
| Development_Endothelin-1/EDNRA signaling                                                          | 7.69E-03       | 5/53         |
| Cell adhesion_Alpha-4 integrins in cell migration and adhesion                                    | 7.77E-03       | 4/34         |
| Development_CNTF receptor signaling                                                               | 7.77E-03       | 4/34         |
| G-protein signaling_G-Protein alpha-q signaling cascades                                          | 7.77E-03       | 4/34         |
| Development_Angiopoietin - Tie2 signaling                                                         | 8.62E-03       | 4/35         |
| Development_TGF-beta-dependent induction of EMT via SMADs                                         | 8.62E-03       | 4/35         |
| Development_FGF-family signaling                                                                  | 8.62E-03       | 4/35         |
| Neurophysiological process_EphB receptors in dendritic spine morphogenesis and synaptogenesis     | 8.62E-03       | 4/35         |
| Immune response_Fc epsilon RI pathway                                                             | 8.98E-03       | 5/55         |
| Immune response_IL-9 signaling pathway                                                            | 9.52E-03       | 4/36         |
| Muscle contraction_ACM regulation of smooth muscle contraction                                    | 9.67E-03       | 5/56         |
| Immune response_TREM1 signaling pathway                                                           | 9.67E-03       | 5/56         |
| Inhibitory action of Lipoxins on neutrophil migration                                             | 1.04E-02       | 5/57         |
| Development_Delta-type opioid receptor mediated cardioprotection                                  | 1.05E-02       | 4/37         |

**Supplementary Table 14. Significantly enriched GeneGo pathway maps among the down-regulated genes following miR-128 transfection into HEY cells.** Significantly enriched (FDR <0.05) GeneGo pathway maps among the down-regulated genes after miR-128 transfection into HEY cells are listed. Also shown are the hypergeometric distribution p-values of enrichments from GeneGo and the ratio of number of genes actually present in the dataset to the number of genes in the Affymetrix array that belong to each pathway. Pathways are sorted based on the enrichment p-values.

| <b>Maps</b>                                                              | <b>p-value</b> | <b>Ratio</b> |
|--------------------------------------------------------------------------|----------------|--------------|
| Cell cycle_ The metaphase checkpoint                                     | 2.30E-19       | 18/36        |
| Cell cycle_ Role of Nek in cell cycle regulation                         | 8.80E-16       | 15/32        |
| Cell cycle_ Role of APC in cell cycle regulation                         | 1.88E-11       | 12/32        |
| Cell cycle_ Spindle assembly and chromosome separation                   | 2.88E-11       | 12/33        |
| Cell cycle_ Chromosome condensation in prometaphase                      | 5.33E-11       | 10/21        |
| Cell cycle_ Initiation of mitosis                                        | 4.49E-10       | 10/25        |
| Cytoskeleton remodeling_ Neurofilaments                                  | 2.04E-07       | 8/25         |
| Cytoskeleton remodeling_ Regulation of actin cytoskeleton by Rho GTPases | 1.79E-06       | 7/23         |
| Proteolysis_ Putative ubiquitin pathway                                  | 1.79E-06       | 7/23         |
| Cytoskeleton remodeling_ Cytoskeleton remodeling                         | 3.78E-06       | 13/102       |
| Cytoskeleton remodeling_ Keratin filaments                               | 4.40E-06       | 8/36         |
| Cytoskeleton remodeling_ TGF, WNT and cytoskeletal remodeling            | 9.76E-06       | 13/111       |
| Cell cycle_ Role of SCF complex in cell cycle regulation                 | 9.89E-06       | 7/29         |
| Cell cycle_ Role of 14-3-3 proteins in cell cycle regulation             | 2.05E-05       | 6/22         |
| Development_ Role of IL-8 in angiogenesis                                | 2.47E-05       | 9/58         |
| Role of alpha-6/beta-4 integrins in carcinoma progression                | 2.53E-05       | 8/45         |
| Development_ PIP3 signaling in cardiac myocytes                          | 3.52E-05       | 8/47         |
| Proteolysis_ Role of Parkin in the Ubiquitin-Proteasomal Pathway         | 3.53E-05       | 6/24         |
| DNA damage_ ATM / ATR regulation of G2 / M checkpoint                    | 5.77E-05       | 6/26         |
| Cell cycle_ Influence of Ras and Rho proteins on G1/S Transition         | 8.61E-05       | 8/53         |
| Apoptosis and survival_ BAD phosphorylation                              | 1.26E-04       | 7/42         |
| Development_ Slit-Robo signaling                                         | 1.36E-04       | 6/30         |
| Cytoskeleton remodeling_ RalA regulation pathway                         | 1.36E-04       | 6/30         |
| Cell adhesion_ Gap junctions                                             | 1.36E-04       | 6/30         |
| Signal transduction_ AKT signaling                                       | 1.47E-04       | 7/43         |
| Neurophysiological process_ Receptor-mediated axon growth repulsion      | 1.98E-04       | 7/45         |

| <b>Maps</b>                                                                                               | <b>p-value</b> | <b>Ratio</b> |
|-----------------------------------------------------------------------------------------------------------|----------------|--------------|
| Cell cycle_Cell cycle (generic schema)                                                                    | 2.10E-04       | 5/21         |
| Transport_Macropinocytosis                                                                                | 2.29E-04       | 4/12         |
| Immune response_CCR3 signaling in eosinophils                                                             | 2.38E-04       | 9/77         |
| Cell cycle_Sister chromatid cohesion                                                                      | 2.66E-04       | 5/22         |
| Cell adhesion_Integrin-mediated cell adhesion and migration                                               | 2.99E-04       | 7/48         |
| Development_EGFR signaling via PIP3                                                                       | 3.33E-04       | 5/23         |
| Cell adhesion_Chemokines and adhesion                                                                     | 3.93E-04       | 10/100       |
| Muscle contraction_GPCRs in the regulation of smooth muscle tone                                          | 4.20E-04       | 9/83         |
| Development_Beta-adrenergic receptors transactivation of EGFR                                             | 4.53E-04       | 6/37         |
| Regulation of lipid metabolism_Regulation of lipid metabolism via LXR, NF-Y and SREBP                     | 5.25E-04       | 6/38         |
| Development_Role of HDAC and calcium/calmodulin-dependent kinase (CaMK) in control of skeletal myogenesis | 6.27E-04       | 7/54         |
| Immune response_BCR pathway                                                                               | 6.27E-04       | 7/54         |
| Transport_Clathrin-coated vesicle cycle                                                                   | 6.77E-04       | 8/71         |
| Reproduction_Progesterone-mediated oocyte maturation                                                      | 6.98E-04       | 6/40         |
| Cytoskeleton remodeling_Role of PKA in cytoskeleton reorganization                                        | 6.98E-04       | 6/40         |
| Regulation of degradation of deltaF508 CFTR in CF                                                         | 7.30E-04       | 5/27         |
| Cell cycle_Transition and termination of DNA replication                                                  | 8.69E-04       | 5/28         |
| Transcription_CREB pathway                                                                                | 1.17E-03       | 6/44         |
| Muscle contraction_EDG5-mediated smooth muscle contraction                                                | 1.20E-03       | 5/30         |
| Apoptosis and survival_Granzyme A signaling                                                               | 1.20E-03       | 5/30         |
| Cell adhesion_Histamine H1 receptor signaling in the interruption of cell barrier integrity               | 1.32E-03       | 6/45         |
| Cytoskeleton remodeling_Fibronectin-binding integrins in cell motility                                    | 1.40E-03       | 5/31         |
| Cytoskeleton remodeling_Reverse signaling by ephrin B                                                     | 1.40E-03       | 5/31         |
| Chemotaxis_Lipoxin inhibitory action on fMLP-induced neutrophil chemotaxis                                | 1.49E-03       | 6/46         |
| Signal transduction_PTEN pathway                                                                          | 1.49E-03       | 6/46         |
| wtCFTR and delta508 traffic / Clathrin coated vesicles formation (norm and CF)                            | 1.54E-03       | 4/19         |
| Cell cycle_Start of DNA replication in early S phase                                                      | 1.63E-03       | 5/32         |
| Cell adhesion_Alpha-4 integrins in cell migration and adhesion                                            | 2.15E-03       | 5/34         |
| Chemotaxis_Inhibitory action of lipoxins on IL-8- and Leukotriene B4-induced neutrophil migration         | 2.55E-03       | 6/51         |
| Transcription_Role of heterochromatin protein 1 (HP1) family in transcriptional silencing                 | 2.73E-03       | 4/22         |
| G-protein signaling_G-Protein alpha-12 signaling pathway                                                  | 3.15E-03       | 5/37         |

| <b>Maps</b>                                                               | <b>p-value</b> | <b>Ratio</b> |
|---------------------------------------------------------------------------|----------------|--------------|
| Cell adhesion_Role of tetraspanins in the integrin-mediated cell adhesion | 3.15E-03       | 5/37         |
| Development_MAG-dependent inhibition of neurite outgrowth                 | 3.15E-03       | 5/37         |
| Cell cycle_Regulation of G1/S transition (part 1)                         | 3.55E-03       | 5/38         |
| Translation_Regulation of EIF2 activity                                   | 3.98E-03       | 5/39         |
| Muscle contraction_ACM regulation of smooth muscle contraction            | 4.10E-03       | 6/56         |
| Apoptosis and survival_Apoptotic Activin A signaling                      | 4.42E-03       | 4/25         |
| Translation_Non-genomic (rapid) action of Androgen Receptor               | 4.45E-03       | 5/40         |
| Inhibitory action of Lipoxins on neutrophil migration                     | 4.48E-03       | 6/57         |
| Immune response_IL-10 signaling pathway                                   | 5.11E-03       | 4/26         |
| Development_EDG5 and EDG3 in cell proliferation and differentiation       | 5.11E-03       | 4/26         |
| Cell cycle_Nucleocytoplasmic transport of CDK/Cyclins                     | 5.91E-03       | 3/14         |
| Development_Flt3 signaling                                                | 6.73E-03       | 5/44         |
| Development_Gastrin in cell growth and proliferation                      | 6.78E-03       | 6/62         |

**Supplementary Table 15. Significantly enriched GeneGo pathway maps among the up-regulated genes following miR-7 transfection into HEY cells.** Significantly enriched (FDR <0.05) GeneGo pathway maps among the up-regulated genes after miR-7 transfection into HEY cells are listed. Also shown are the hypergeometric distribution p-values of enrichments from GeneGo and the ratio of number of genes actually present in the dataset to the number of genes in the Affymetrix array that are in each pathway. In this case only 1 pathway was found to be significant.

| <b>Maps</b>                       | <b>p-value</b> | <b>Ratio</b> |
|-----------------------------------|----------------|--------------|
| Transport_RAB3 regulation pathway | 8.01E-07       | 4/14         |

**Supplementary Table 16. Significantly enriched GeneGo pathway maps among the up-regulated genes following miR-128 transfection into HEY cells.** Significantly enriched (FDR <0.05) GeneGo pathway maps among the up-regulated genes after miR-128 transfection into HEY cells are listed. Also shown are the hypergeometric distribution p-values of enrichments from GeneGo and the ratio of number of genes actually present in the dataset to the number of genes in the Affymetrix array that belong to each pathway. Pathways are sorted based on the enrichment p-values.

| <b>Maps</b>                                                                                   | <b>p-value</b> | <b>Ratio</b> |
|-----------------------------------------------------------------------------------------------|----------------|--------------|
| Immune response_Histamine H1 receptor signaling in immune response                            | 2.89E-07       | 13/48        |
| Transport_Clathrin-coated vesicle cycle                                                       | 1.18E-06       | 15/71        |
| Immune response_Fc epsilon RI pathway                                                         | 1.59E-06       | 13/55        |
| Development_Activation of Erk by ACM1, ACM3 and ACM5                                          | 5.67E-06       | 11/44        |
| Development_Regulation of epithelial-to-mesenchymal transition (EMT)                          | 9.65E-06       | 13/64        |
| Neurophysiological process_Circadian rhythm                                                   | 1.13E-05       | 11/47        |
| Cytoskeleton remodeling_FAK signaling                                                         | 1.45E-05       | 12/57        |
| Development_Angiotensin signaling via STATs                                                   | 1.45E-05       | 9/32         |
| Development_Leptin signaling via JAK/STAT and MAPK cascades                                   | 1.53E-05       | 8/25         |
| Development_Cross-talk between VEGF and Angiopoietin 1 signaling pathways                     | 2.12E-05       | 8/26         |
| Cell adhesion_Cadherin-mediated cell adhesion                                                 | 2.12E-05       | 8/26         |
| Immune response_Gastrin in inflammatory response                                              | 2.27E-05       | 13/69        |
| Cytoskeleton remodeling_TGF, WNT and cytoskeletal remodeling                                  | 2.32E-05       | 17/111       |
| Immune response_Neurotensin-induced activation of IL-8 in colonocytes                         | 2.42E-05       | 10/42        |
| Cytoskeleton remodeling_Role of Activin A in cytoskeleton remodeling                          | 2.74E-05       | 7/20         |
| Neurophysiological process_EphB receptors in dendritic spine morphogenesis and synaptogenesis | 3.20E-05       | 9/35         |
| Development_Hedgehog and PTH signaling pathways in bone and cartilage development             | 5.17E-05       | 9/37         |
| Development_TGF-beta-dependent induction of EMT via RhoA, PI3K and ILK.                       | 5.62E-05       | 10/46        |
| Immune response_Human NKG2D signaling                                                         | 6.48E-05       | 9/38         |
| Immune response_IL-15 signaling via JAK-STAT cascade                                          | 7.64E-05       | 7/23         |

| <b>Maps</b>                                                             | <b>p-value</b> | <b>Ratio</b> |
|-------------------------------------------------------------------------|----------------|--------------|
| Development_A3 receptor signaling                                       | 9.94E-05       | 10/49        |
| Signal transduction_IP3 signaling                                       | 9.94E-05       | 10/49        |
| Translation_Non-genomic (rapid) action of Androgen Receptor             | 9.97E-05       | 9/40         |
| Development_Glucocorticoid receptor signaling                           | 1.03E-04       | 7/24         |
| Immune response_Function of MEF2 in T lymphocytes                       | 1.19E-04       | 10/50        |
| Mucin expression in CF via TLRs, EGFR signaling pathways                | 1.42E-04       | 10/51        |
| Development_A2A receptor signaling                                      | 1.81E-04       | 9/43         |
| Development_A1 receptor signaling                                       | 1.98E-04       | 10/53        |
| Development_Angiopoietin - Tie2 signaling                               | 2.17E-04       | 8/35         |
| Immune response_CD40 signaling                                          | 2.28E-04       | 11/64        |
| Apoptosis and survival_Anti-apoptotic TNFs/NF-kB/IAP pathway            | 2.34E-04       | 7/27         |
| Signal transduction_Calcium signaling                                   | 2.60E-04       | 9/45         |
| Apoptosis and survival_NO synthesis and signaling                       | 2.73E-04       | 10/55        |
| Development_GDNF family signaling                                       | 3.10E-04       | 9/46         |
| Development_Gastrin in differentiation of the gastric mucosa            | 3.96E-04       | 8/38         |
| Immune response_CCR5 signaling in macrophages and T lymphocytes         | 4.27E-04       | 10/58        |
| Development_Role of Activin A in cell differentiation and proliferation | 5.72E-04       | 8/40         |
| Cytoskeleton remodeling_Reverse signaling by ephrin B                   | 5.84E-04       | 7/31         |
| Development_EDNRB signaling                                             | 5.93E-04       | 9/50         |
| Apoptosis and survival_HTR1A signaling                                  | 5.93E-04       | 9/50         |
| Development_A2B receptor: action via G-protein alpha s                  | 5.93E-04       | 9/50         |
| Reproduction_GnRH signaling                                             | 6.54E-04       | 11/72        |
| Transport_ACM3 in salivary glands                                       | 6.81E-04       | 8/41         |
| Neurophysiological process_Netrin-1 in regulation of axon guidance      | 6.81E-04       | 8/41         |
| Development_Gastrin in cell growth and proliferation                    | 7.39E-04       | 10/62        |
| Signal transduction_Activation of PKC via G-Protein coupled receptor    | 7.99E-04       | 9/52         |
| Proteolysis_Role of Parkin in the Ubiquitin-Proteasomal Pathway         | 8.15E-04       | 6/24         |
| Immune response_IL-7 signaling in B lymphocytes                         | 9.49E-04       | 8/43         |
| Development_Angiotensin signaling via PYK2                              | 9.49E-04       | 8/43         |
| Apoptosis and survival_Apoptotic Activin A signaling                    | 1.03E-03       | 6/25         |
| Development_NOTCH1-mediated pathway for NF-KB activity modulation       | 1.05E-03       | 7/34         |
| G-protein signaling_G-Protein alpha-q signaling cascades                | 1.05E-03       | 7/34         |
| Immune response_IFN gamma signaling pathway                             | 1.06E-03       | 9/54         |
| Immune response_CD28 signaling                                          | 1.06E-03       | 9/54         |
| PGE2 pathways in cancer                                                 | 1.21E-03       | 9/55         |
| Development_EPO-induced Jak-STAT pathway                                | 1.26E-03       | 7/35         |

| <b>Maps</b>                                                                                         | <b>p-value</b> | <b>Ratio</b> |
|-----------------------------------------------------------------------------------------------------|----------------|--------------|
| Cytoskeleton remodeling_Cytoskeleton remodeling                                                     | 1.28E-03       | 13/102       |
| Neurophysiological process_Receptor-mediated axon growth repulsion                                  | 1.30E-03       | 8/45         |
| Neurophysiological process_Glutamate regulation of Dopamine D1A receptor signaling                  | 1.30E-03       | 8/45         |
| Cell adhesion_Histamine H1 receptor signaling in the interruption of cell barrier integrity         | 1.30E-03       | 8/45         |
| Transcription_Androgen Receptor nuclear signaling                                                   | 1.30E-03       | 8/45         |
| Development_Keratinocyte differentiation                                                            | 1.39E-03       | 9/56         |
| Immune response_TREM1 signaling pathway                                                             | 1.39E-03       | 9/56         |
| Development_Endothelin-1/EDNRA transactivation of EGFR                                              | 1.50E-03       | 8/46         |
| Immune response_MIF - the neuroendocrine-macrophage connector                                       | 1.50E-03       | 8/46         |
| Development_WNT5A signaling                                                                         | 1.50E-03       | 8/46         |
| Development_TGF-beta-dependent induction of EMT via MAPK                                            | 1.74E-03       | 8/47         |
| Development_Leptin signaling via PI3K-dependent pathway                                             | 1.74E-03       | 8/47         |
| Cytoskeleton remodeling_ACM3 and ACM4 in keratinocyte migration                                     | 1.78E-03       | 7/37         |
| Development_Prolactin receptor signaling                                                            | 1.79E-03       | 9/58         |
| Development_Delta-type opioid receptor signaling via G-protein alpha-14                             | 1.93E-03       | 6/28         |
| Immune response_IL-7 signaling in T lymphocytes                                                     | 2.09E-03       | 7/38         |
| Cell cycle_Regulation of G1/S transition (part 1)                                                   | 2.09E-03       | 7/38         |
| Development_WNT signaling pathway. Part 1. Degradation of beta-catenin in the absence WNT signaling | 2.25E-03       | 5/20         |
| Development_Melanocyte development and pigmentation                                                 | 2.29E-03       | 8/49         |
| Immune response_IL-2 activation and signaling pathway                                               | 2.29E-03       | 8/49         |
| Immune response_Bacterial infections in normal airways                                              | 2.29E-03       | 8/49         |
| Development_PACAP signaling in neural cells                                                         | 2.44E-03       | 7/39         |
| Transcription_NF-kB signaling pathway                                                               | 2.44E-03       | 7/39         |
| G-protein signaling_Regulation of p38 and JNK signaling mediated by G-proteins                      | 2.44E-03       | 7/39         |
| Development_Thyroliberin signaling                                                                  | 2.56E-03       | 9/61         |
| Immune response_Histamine signaling in dendritic cells                                              | 2.61E-03       | 8/50         |
| Development_GM-CSF signaling                                                                        | 2.61E-03       | 8/50         |
| Delta508-CFTR traffic / ER-to-Golgi in CF                                                           | 2.78E-03       | 4/13         |
| Normal wtCFTR traffic / ER-to-Golgi                                                                 | 2.78E-03       | 4/13         |
| Development_IGF-1 receptor signaling                                                                | 2.97E-03       | 8/51         |
| Membrane-bound ESR1: interaction with G-proteins signaling                                          | 2.97E-03       | 8/51         |
| Immune response_NFAT in immune response                                                             | 2.97E-03       | 8/51         |
| Some pathways of EMT in cancer cells                                                                | 2.97E-03       | 8/51         |
| Development_EGFR signaling pathway                                                                  | 3.21E-03       | 9/63         |

| <b>Maps</b>                                                                                               | <b>p-value</b> | <b>Ratio</b> |
|-----------------------------------------------------------------------------------------------------------|----------------|--------------|
| Cell adhesion_Chemokines and adhesion                                                                     | 3.24E-03       | 12/100       |
| Blood coagulation_GPIb-IX-V-dependent platelet activation                                                 | 3.25E-03       | 10/75        |
| Immune response_PGE2 common pathways                                                                      | 3.36E-03       | 8/52         |
| Immune response_Antiviral actions of Interferons                                                          | 3.36E-03       | 8/52         |
| Cytoskeleton remodeling_CDC42 in cellular processes                                                       | 3.53E-03       | 5/22         |
| Muscle contraction_Regulation of eNOS activity in endothelial cells                                       | 3.58E-03       | 9/64         |
| Immune response_PIP3 signaling in B lymphocytes                                                           | 3.78E-03       | 7/42         |
| Development_FGFR signaling pathway                                                                        | 3.79E-03       | 8/53         |
| Development_Endothelin-1/EDNRA signaling                                                                  | 3.79E-03       | 8/53         |
| Development_WNT signaling pathway. Part 2                                                                 | 3.79E-03       | 8/53         |
| Development_PDGF signaling via STATs and NF-kB                                                            | 3.95E-03       | 6/32         |
| Immune response_Role of DAP12 receptors in NK cells                                                       | 4.27E-03       | 8/54         |
| Development_Role of HDAC and calcium/calmodulin-dependent kinase (CaMK) in control of skeletal myogenesis | 4.27E-03       | 8/54         |
| Development_ACM2 and ACM4 activation of ERK                                                               | 4.33E-03       | 7/43         |
| Development_VEGF signaling and activation                                                                 | 4.33E-03       | 7/43         |
| Apoptosis and survival_Anti-apoptotic action of Gastrin                                                   | 4.33E-03       | 7/43         |
| Immune response_HTR2A-induced activation of cPLA2                                                         | 4.33E-03       | 7/43         |
| Development_Angiotensin activation of ERK                                                                 | 4.63E-03       | 6/33         |
| Normal and pathological TGF-beta-mediated regulation of cell proliferation                                | 4.63E-03       | 6/33         |
| Transcription_CREB pathway                                                                                | 4.94E-03       | 7/44         |
| Neurophysiological process_NMDA-dependent postsynaptic long-term potentiation in CA1 hippocampal neurons  | 5.20E-03       | 10/80        |
| Signal transduction_Erk Interactions: Inhibition of Erk                                                   | 5.40E-03       | 6/34         |
| Development_Role of CDK5 in neuronal development                                                          | 5.40E-03       | 6/34         |
| Development_VEGF signaling via VEGFR2 - generic cascades                                                  | 5.61E-03       | 7/45         |
| Development_Growth hormone signaling via STATs and PLC/IP3                                                | 6.25E-03       | 6/35         |
| IL-1 beta-dependent CFTR expression                                                                       | 6.31E-03       | 4/16         |
| Transcription_Transcription regulation of aminoacid metabolism                                            | 6.31E-03       | 5/25         |
| Development_G-Proteins mediated regulation MARK-ERK signaling                                             | 6.34E-03       | 7/46         |
| Neurophysiological process_ACM regulation of nerve impulse                                                | 6.34E-03       | 7/46         |
| Development_Hedgehog signaling                                                                            | 6.34E-03       | 7/46         |
| Immune response_ICOS pathway in T-helper cell                                                             | 6.34E-03       | 7/46         |
| Bacterial infections in CF airways                                                                        | 6.64E-03       | 8/58         |
| Regulation of CFTR activity (norm and CF)                                                                 | 6.64E-03       | 8/58         |
| Development_PIP3 signaling in cardiac myocytes                                                            | 7.15E-03       | 7/47         |
| Cell adhesion_Tight junctions                                                                             | 7.20E-03       | 6/36         |
| G-protein signaling_RAC1 in cellular process                                                              | 7.20E-03       | 6/36         |



| <b>Maps</b>                                                                                 | <b>p-value</b> | <b>Ratio</b> |
|---------------------------------------------------------------------------------------------|----------------|--------------|
| Regulation of lipid metabolism_ Stimulation of Arachidonic acid production by ACM receptors | 7.86E-03       | 9/72         |
| Transcription_ Transcription factor Tubby signaling pathways                                | 7.94E-03       | 4/17         |
| Muscle contraction_ Relaxin signaling pathway                                               | 8.03E-03       | 7/48         |
| G-protein signaling_ G-Protein alpha-i signaling cascades                                   | 8.85E-03       | 5/27         |
| Muscle contraction_ nNOS Signaling in Skeletal Muscle                                       | 8.85E-03       | 5/27         |
| Neurophysiological process_ Long-term depression in cerebellum                              | 8.99E-03       | 7/49         |
| Development_ Mu-type opioid receptor signaling                                              | 9.41E-03       | 6/38         |
| Immune response_ Oncostatin M signaling via JAK-Stat in mouse cells                         | 9.82E-03       | 4/18         |
| Development_ TGF-beta receptor signaling                                                    | 1.00E-02       | 7/50         |
| HIV-1 signaling via CCR5 in macrophages and T lymphocytes                                   | 1.07E-02       | 6/39         |
| Development_ ERBB-family signaling                                                          | 1.07E-02       | 6/39         |
| Transport_ Macropinocytosis regulation by growth factors                                    | 1.09E-02       | 8/63         |
| Signal transduction_ PKA signaling                                                          | 1.12E-02       | 7/51         |
| Immune response_ IL-15 signaling                                                            | 1.19E-02       | 8/64         |
| wtCFTR and delta508 traffic / Clathrin coated vesicles formation (norm and CF)              | 1.20E-02       | 4/19         |
| Immune response_ Delta-type opioid receptor signaling in T-cells                            | 1.20E-02       | 5/29         |
| Immune response_ CD137 signaling in immune cell                                             | 1.20E-02       | 5/29         |
| Immune response_ MIF in innate immunity response                                            | 1.21E-02       | 6/40         |
| Immune response_ T cell receptor signaling pathway                                          | 1.24E-02       | 7/52         |
